# Supplementary material for: Different Alterations in Gut Microbiota between Bifidobacterium longum and Fecal Microbiota Transplantation Treatments in Propionic Acid Rat Model of Autism
Source: Nutrients. 2022 Jan 30;14(3):608. doi: 10.3390/nu14030608 (PMC8838423; doi:10.3390/nu14030608)
Supplement: Supplementary file 1 [file nutrients-14-00608-s001.zip › Autism_manuscript_082021_Supplementary_Tables.xlsx]

## Sheet: Table S1
Table S1: Number of sequencing reads per sample. NS, Normal saline control group; PPA+NS; propionic acid control group; PPA+BF, Bifidobacterium treated group; PPA+FT, fecal microbiota transplantation treated group.
Sample ID	Group	Day	Number of reads
S1	NS	0	54449
S2	NS	0	54690
S3	NS	0	54045
S4	NS	0	56676
S5	NS	0	47188
S6	NS	4	53759
S7	NS	4	55342
S8	NS	4	46167
S9	NS	4	62318
S10	NS	4	55148
S11	NS	18	54171
S12	NS	18	49943
S13	NS	18	48946
S14	NS	18	56333
S15	NS	18	57668
S16	NS	33	60630
S17	NS	33	59268
S18	NS	33	54446
S19	NS	33	52594
S20	NS	33	61629
S21	PPA+NS	0	60048
S22	PPA+NS	0	55408
S23	PPA+NS	0	51232
S24	PPA+NS	0	45811
S25	PPA+NS	0	53299
S26	PPA+NS	4	53235
S27	PPA+NS	4	54481
S28	PPA+NS	4	47977
S29	PPA+NS	4	43312
S30	PPA+NS	4	55252
S31	PPA+NS	18	54346
S32	PPA+NS	18	50905
S33	PPA+NS	18	52922
S34	PPA+NS	18	60544
S35	PPA+NS	18	55124
S36	PPA+NS	33	51798
S37	PPA+NS	33	51090
S38	PPA+NS	33	53776
S39	PPA+NS	33	57131
S40	PPA+NS	33	58252
S41	PPA+BF	0	54201
S42	PPA+BF	0	50593
S43	PPA+BF	0	53798
S44	PPA+BF	0	56931
S45	PPA+BF	0	55615
S46	PPA+BF	4	48144
S47	PPA+BF	4	48125
S48	PPA+BF	4	49456
S49	PPA+BF	4	51246
S50	PPA+BF	4	50814
S51	PPA+BF	18	58393
S52	PPA+BF	18	50930
S53	PPA+BF	18	51106
S54	PPA+BF	18	51544
S55	PPA+BF	18	61594
S56	PPA+BF	33	56468
S57	PPA+BF	33	54989
S58	PPA+BF	33	57949
S59	PPA+BF	33	54407
S60	PPA+BF	33	53486
S61	PPA+FT	0	54546
S62	PPA+FT	0	50066
S63	PPA+FT	0	55664
S64	PPA+FT	0	50057
S65	PPA+FT	0	49392
S66	PPA+FT	4	51244
S67	PPA+FT	4	49498
S68	PPA+FT	4	50559
S69	PPA+FT	4	52586
S70	PPA+FT	4	49689
S71	PPA+FT	18	50469
S72	PPA+FT	18	66650
S73	PPA+FT	18	57428
S74	PPA+FT	18	58660
S75	PPA+FT	18	41737
S76	PPA+FT	33	58381
S77	PPA+FT	33	50454
S78	PPA+FT	33	60203
S79	PPA+FT	33	61719
S80	PPA+FT	33	54849

## Sheet: Table S2
Table S2: Relative abundance of the identified taxa in each sample. NS, Normal saline control group; PPA+NS; propionic acid control group; PPA+BF, Bifidobacterium treated group; PPA+FT, fecal microbiota transplantation treated group.
ID →	S1	S2	S3	S4	S5	S6	S7	S8	S9	S10	S11	S12	S13	S14	S15	S16	S17	S18	S19	S20	S21	S22	S23	S24	S25	S26	S27	S28	S29	S30	S31	S32	S33	S34	S35	S36	S37	S38	S39	S40	S41	S42	S43	S44	S45	S46	S47	S48	S49
Group →	NS	NS	NS	NS	NS	NS	NS	NS	NS	NS	NS	NS	NS	NS	NS	NS	NS	NS	NS	NS	PPA+NS	PPA+NS	PPA+NS	PPA+NS	PPA+NS	PPA+NS	PPA+NS	PPA+NS	PPA+NS	PPA+NS	PPA+NS	PPA+NS	PPA+NS	PPA+NS	PPA+NS	PPA+NS	PPA+NS	PPA+NS	PPA+NS	PPA+NS	PPA+BF	PPA+BF	PPA+BF	PPA+BF	PPA+BF	PPA+BF	PPA+BF	PPA+BF	PPA+BF
Time →	0	0	0	0	0	4	4	4	4	4	18	18	18	18	18	33	33	33	33	33	0	0	0	0	0	4	4	4	4	4	18	18	18	18	18	33	33	33	33	33	0	0	0	0	0	4	4	4	4
k__Bacteria;p__Actinobacteria;c__Actinobacteria;o__Bifidobacteriales;f__Bifidobacteriaceae;g__Bifidobacterium;s__breve	0.000695249	0.000967933	0.00192727	0.0037894	0.00166826	0.00764967	0.0534818	0.00128232	0.00124138	0.00503904	0.00237262	0.00186245	0.00119215	0.00135376	0.00204774	0.00193986	0.00087063	0.00450771	0	0.00146393	0.00292192	0.000968907	0.0238942	0.010458	0.00554925	0.00122066	0.0324369	0.0228248	0.0114965	0.00408521	0.00100525	0.00391901	0.0246677	0.000917559	0.00470912	0.00438817	0.00224623	0.000715286	0.00197874	0.000579993	0	0.00307215	0.00265244	0.00644846	0.000500574	0.0153903	0.0106796	0.0243306	0.0368797
k__Bacteria;p__Actinobacteria;c__Coriobacteriia;o__Coriobacteriales;f__Coriobacteriaceae;g__Eggerthella	0	0	0	0	0	0	0	0	0	0	0	0	0	0	0	0	0	0	0	0	0	0	0	0	0	0	0	0	0	0	0	0	0	0	0	0	0	0	0	0	0	0	0	0.000834845	0	0	0	0	0
k__Bacteria;p__Actinobacteria;c__Coriobacteriia;o__Coriobacteriales;f__Coriobacteriaceae;g__Enterococcus;s__casseliflavus	0	0.000562026	0	0.000976058	0.000532425	0	0.000220869	0	0	0	0	0	0	0	0	0.000221699	0.000571351	0	0	0	0	0	0	0	0	0	0	0	0	0	0	0	0	0	0	0	0	0	0	0	0	0	0	0	0	0	0	0	0
k__Bacteria;p__Actinobacteria;c__Coriobacteriia;o__Coriobacteriales;f__Coriobacteriaceae;g__Paraeggerthella;s__hongkongensis	0.00251614	0.0052768	0.00413797	0	0.00472083	0.00175035	0.0017354	0.00346572	0.00118621	0.00143084	0.00219901	0.00243812	0	0.000984555	0.00403698	0.00410143	0.0136308	0.00192764	0.00291007	0.00336979	0.00432669	0.00102763	0.00231119	0	0.0032805	0.0008719	0	0	0	0.00163408	0.00064855	0.00391901	0.00744744	0.00161268	0.00122847	0.00217734	0.00541737	0.00467916	0.00520127	0.0024726	0.00473003	0.00265175	0.00351672	0.00132424	0.00332735	0.00525253	0.000901526	0.00224276	0
k__Bacteria;p__Bacteroidetes;c__Bacteroidia;o__Bacteroidales	0.0357888	0.0776845	0.0822776	0.0343056	0.0807511	0.0309552	0.0235383	0.0641159	0.0287172	0.0311674	0.00465843	0.00115133	0.0631837	0.0370131	0.0110578	0.0551476	0.015753	0.00720641	0.0243445	0.00301072	0.0315231	0.0228427	0.0575665	0.0269073	0.0300763	0.0673805	0.0134756	0.0283417	0.0144871	0.0420193	0.0350542	0.00914435	0.0112183	0.0230224	0.00640557	0.00713496	0.0421498	0.0168986	0.00881954	0.0188345	0.0298974	0.0605375	0.0428563	0.0430377	0.00971703	0.0417264	0.0551664	0.0394522	0.0587495
k__Bacteria;p__Bacteroidetes;c__Bacteroidia;o__Bacteroidales;f__Bacteroidaceae;g__Bacteroides	0	0	0	0	0	0	0	0	0	0	0	0	0	0	0	0	0	0	0	0	0	0.000146804	0	0	0	0	0	0	0	0	0	0	0	0	0	0	0	0	0	0	0	3.23384e-05	0	0	0	0	0	0	0
k__Bacteria;p__Bacteroidetes;c__Bacteroidia;o__Bacteroidales;f__Bacteroidaceae;g__Bacteroides;s__acidifaciens	0.0996524	0.0202329	0.164073	0.0771947	0.0812125	0.049107	0.0691635	0.0697997	0.017269	0.0335936	0.220885	0.00992178	0.0795582	0.0336287	0.199596	0.0387973	0.0161611	0.0163998	0.0127355	0.0568169	0.189054	0.168825	0.065069	0.102453	0.103167	0.08297	0.0208992	0.0812029	0.114072	0.089787	0.0684221	0.0143353	0.0386513	0.0317531	0.086987	0.0471644	0.0368315	0.0805293	0.0197309	0.0249702	0.0894244	0.115286	0.136705	0.10165	0.047849	0.0204591	0.0379681	0.0143741	0.0912867
k__Bacteria;p__Bacteroidetes;c__Bacteroidia;o__Bacteroidales;f__Porphyromonadaceae	0	0	0	0	0	0.00204207	0.000662607	0.000138629	0	0	0	0	0	0	0	0	0	0	0	0	0	0	0.00160006	0	0	0	0	0	0.0014759	0	0	0	0.000157119	0	0	0	0.000132131	0	0	0	0	0	0	0	0	0	0	0	0
k__Bacteria;p__Bacteroidetes;c__Bacteroidia;o__Bacteroidales;f__Porphyromonadaceae;g__Macellibacteroides;s__fermentans	0	0	0	0	0	0	0	0	0	0	0.000549753	0	0	0	0	0	0	0	0	0	0	0	0	0	0	0	0	0	0	0	0	0	0	0	0	0	0	0	0	0	0	0	0	0	0	0	0	0	0
k__Bacteria;p__Bacteroidetes;c__Bacteroidia;o__Bacteroidales;f__Porphyromonadaceae;g__Parabacteroides;s__gordonii	0.00854163	0.00583882	0.00306096	0.00499512	0.00259113	0.0104373	0.00672073	0.0129965	0.0147034	0.00413699	0.0170713	0.0108361	0.0111851	0.00670728	0.00468055	0.00232784	0.000462522	0.00115658	0.000344202	0.000580046	0.00424241	0.0108635	0.00984924	0.0157757	0.00272864	0.00575454	0.0028919	0.00847366	0.015497	0.00939597	0.0128737	0.00299082	0.00534205	0.00255804	0.00602533	0.00998225	0.00621015	0.00739129	0.00146992	0.00442626	0.00473003	0.0027811	0.00917923	0.0137893	0.00291511	0.00367309	0.00766297	0.0155634	0.00387048
k__Bacteria;p__Bacteroidetes;c__Bacteroidia;o__Bacteroidales;f__Rikenellaceae	0	0	0	0	0	0	0	0.000311915	0.000110345	0	0.00144672	0.000677254	0	0	0.000263281	0	0	0	0	0	0	0	0	0	0	0	0	0	0	0	0.000194565	0	0	0	0.000321741	0	0	0.000357643	0	0	0	0	0	0	0	0	0.000346741	0.0005437	0
k__Bacteria;p__Bacteroidetes;c__Bacteroidia;o__Bacteroidales;f__Rikenellaceae;g__Alistipes;s__massiliensis	0.00834299	0.00152996	0	0.000229661	0.00028396	0	0.000441738	0	0	0	0	0	0	0.00104609	0.00119939	0.0015796	0.00108829	0	0	0	0	0.00205526	0	0	0	0	0.000864588	0	0	0.0103881	0	0.00209701	0.00122553	0	0	0.00170837	0	0	0.00025441	0.00958515	0.00139819	0	0.00163915	0	0	0.00653811	0	0	0
k__Bacteria;p__Bacteroidetes;c__Bacteroidia;o__Bacteroidales;f__S24-7	0.28439	0.23296	0.337415	0.435551	0.352359	0.248712	0.315527	0.28308	0.267614	0.22881	0.254941	0.056991	0.389201	0.183496	0.156184	0.148704	0.035723	0.0285587	0.0576069	0.121672	0.324586	0.327138	0.290357	0.295058	0.140663	0.215813	0.236569	0.270292	0.265274	0.298249	0.209774	0.097872	0.0671841	0.114472	0.115944	0.207182	0.184983	0.318302	0.183034	0.0913642	0.252625	0.28018	0.270549	0.451737	0.419511	0.199927	0.23561	0.302535	0.25155
k__Bacteria;p__Deferribacteres;c__Deferribacteres;o__Deferribacterales;f__Deferribacteraceae;g__Mucispirillum;s__schaedleri	0.00453567	0	0.00133209	0.000315783	0.00305257	0	0.000631054	0	0.000689655	0	0	0	0	0	0	0	0	0	0	0	0	0.00428668	0	0.00131168	0	0	0.000387574	0	0	0.000817041	0	0	0	0	0	0	0	0	0	0	0.00065447	0.000452737	0	0	0.000618356	0.000293848	0.000797503	0.00135925	0
k__Bacteria;p__Firmicutes	0	0.00349705	0.0027492	8.61228e-05	0.0021297	0.000518622	0.00132521	0	0.0030069	0.00326604	0.00251729	0.00216721	0	0.00172297	0	0	0.00693783	0	0.00197134	0	0.00233192	0	0.0015645	0.000248157	0.000521201	0.00129041	0.000387574	0	0	0.00163408	0.00038913	0.00103132	0.0019797	0.000861949	0	0.000502462	0	0.000774893	0.00489032	0.000427363	0	6.46768e-05	0	0	0	0.00268136	0.000520111	0.00159712	0
k__Bacteria;p__Firmicutes;c__Bacilli	0	0	0	0	0	0	0.00157764	0	0.000441379	0.0030172	0.00405081	0.0160509	0.0016129	0.00129223	0	0.000138562	0	0.00361803	0	0	0	0	0	0	0	0	0	0	0	0.00023344	0.038459	0.021692	0.00317381	0	0.00128696	0.00026798	0	0	0	0	0	0	0	0	0	0	0	0	0
k__Bacteria;p__Firmicutes;c__Bacilli;o__Bacillales;f__Bacillaceae	0.0023175	0.00193587	0	0.00192341	0	0.00301449	0.0046067	0	0.0017931	0.0047902	0.00222794	0	0.00350631	0.00110762	0.00193073	0.00884024	0.0921779	0.0497331	0.0135177	0.0220418	0.0223078	0	0.036908	0.00542399	0	0.00606843	0.0208694	0.064544	0.0180215	0.0437701	0.0109605	0.0114476	0.00336235	0.00467121	0.000380239	0.00291428	0.0375582	0.00295056	0.00189394	0.0153546	0	0.00190796	0	0.00437574	0.0241748	0.0161983	0	0.0153255	0.00623053
k__Bacteria;p__Firmicutes;c__Bacilli;o__Bacillales;f__Bacillaceae;g__Virgibacillus;s__halophilus	0	0	0	0	0	0	0	0	0	0	0	0	0	0	0	0	0	0	0	0	0	0	0	0	0	0	0	0	0	0	0	0	0	0	0	0	0	0	0	0	0.000118994	0	0	0	0	0	0	0	0
k__Bacteria;p__Firmicutes;c__Bacilli;o__Bacillales;f__Planococcaceae;g__Staphylococcus;s__saprophyticus	0	0.000124895	0	0	0	0.000972416	0.00403875	0.00277258	0.00311724	0.0177922	0.00402187	0.00619688	0.000876578	0	0	0	0	0	0	0.00066291	0	0	0	0	0	0.000383636	0	0	0	0	0.0821389	0.0510158	0.00958426	0	0	0	0	0	0	0	0	0	0	0	0	0	0	0	0
k__Bacteria;p__Firmicutes;c__Bacilli;o__Lactobacillales	0.000463499	0	0	0	0.000993859	0	0.000157764	0	0.00377931	0.00410588	0	0	7.01262e-05	9.2302e-05	0	0.00166274	0.000326486	0.00228351	0.000250329	0.000276213	0	0.000528495	0.00320011	0	0.00392433	0.00551041	0.00497883	0.000180291	0	0.000729501	0	0.000584413	0.00251391	0.00333658	0.00143321	0.000937929	0.00260959	0	0	9.15779e-05	0.000118994	0.000388061	0	0	0	0.00077135	0.00208044	0.00305831	0.00575852
k__Bacteria;p__Firmicutes;c__Bacilli;o__Lactobacillales;f__Carnobacteriaceae;g__Isobaculum;s__melis	0	0	0	0	0	0	0	0	0	0	0	0	0	0	0	0	0	0	0	0	0	0	0	0	0	0	0	0	0	0	0	0	0	0	0	0	0	0	0	0	0	0	0	0	0	0	0	0	0
k__Bacteria;p__Firmicutes;c__Bacilli;o__Lactobacillales;f__Lactobacillaceae	0.00615792	0	0.0127257	0.0330998	0.0270472	0.0351042	0.0813429	0.00949608	0.0124414	0.0158325	0.0192413	0.0330162	0.0373422	0.124085	0.0984086	0.122128	0.118433	0.366489	0.113055	0.0356867	0.024443	0.0689392	0.00714692	0.033572	0.121378	0.0569874	0.0592392	0.075073	0.0584534	0.0510067	0.0151761	0.0183575	0.0954341	0.0686223	0.259733	0.144676	0.0384171	0.0428874	0.0489597	0.100522	0.0103525	0.0619927	0.0696787	0.0040015	0.00527075	0.0768044	0.0846394	0.0132867	0.046666
k__Bacteria;p__Firmicutes;c__Bacilli;o__Lactobacillales;f__Lactobacillaceae;g__Lactobacillus	0	0	0	0	0.000674405	0	0	6.93145e-05	0	0.000248841	0	0	0.000140252	0	0	0	0	0	0	0	0	0	0	0	0	0	0.000536641	0	0	0	0	0	0	0.000139024	0	0	0	0	0	0	0	9.70152e-05	0.00032783	0	0	0	0	0	0
k__Bacteria;p__Firmicutes;c__Bacilli;o__Lactobacillales;f__Lactobacillaceae;g__Lactobacillus;s__hamsteri	0.0557524	0.00677553	0.0311198	0.183413	0.176659	0.100515	0.137507	0.0472725	0.126593	0.111823	0.0207459	0.0456469	0.0883941	0.220879	0.158758	0.183456	0.138104	0.0520759	0.356499	0.147857	0.079791	0.181479	0.0950434	0.0816081	0.286139	0.109127	0.203745	0.114485	0.120286	0.102276	0.0454634	0.116126	0.236244	0.0727096	0.189535	0.153016	0.125557	0.0484904	0.0356456	0.180988	0.200357	0.233257	0.229213	0.040821	0.00235564	0.25348	0.14837	0.0771034	0.251392
k__Bacteria;p__Firmicutes;c__Bacilli;o__Lactobacillales;f__Lactobacillaceae;g__Pediococcus	0	0	0	0.00011483	0	0	0	0	0	0	0	0	0	0.000307673	5.85069e-05	0.00299293	0.000136036	0.00584223	6.25821e-05	8.28638e-05	0	0.000675299	0	0	0.00386302	0.000279008	8.94401e-05	0	0	0.00020426	0	0	0	5.56096e-05	0.00532335	0.00378521	0	0	0	0	0	0	0.000208619	0	0	0.00113866	0.000832178	0.000101944	0.00198244
k__Bacteria;p__Firmicutes;c__Bacilli;o__Lactobacillales;f__Lactobacillaceae;g__Pediococcus;s__ethanolidurans	0	0	0	0	0	0	0	0	0	0	0	0	0	0	0	0	0	0.000177936	0	0	0	0	0	0	0.000459883	0	0	0	0	0	0	0	0	0	0.000760479	0	0	0	0	0	0	0	0	0	0	0	0	0	0
k__Bacteria;p__Firmicutes;c__Bacilli;o__Lactobacillales;f__Streptococcaceae;g__Streptococcus	0	0	0	0	0	0	0	0	0	0	0	0	0	0	0	0	0	0	0	0	0	0	0	0	0	0	0	0	0	0	0	0	0	0	0	0	0	0	0	0	0	0	0	0	0	0	0	0	0
k__Bacteria;p__Firmicutes;c__Bacilli;o__Lactobacillales;f__Streptococcaceae;g__Streptococcus;s__equi	0	0	0	0	0.00216519	0	0	0	0	0.000248841	0	0.000711117	0.000666199	0	0	0	0.00155081	0	0.0014081	0.00118771	0	0	0	0	0	0	0	0.00057693	0	0.000379341	0.000810688	0.00113445	0.000345662	0.00136244	0.000584983	0	0	0	0.000424016	0	0	0	0	0.000431816	0.000618356	0	0.000381415	0	9.4402e-05
k__Bacteria;p__Firmicutes;c__Clostridia	0	0	0	0	0	0	0	0	0	0	0.000115737	0.00121906	0	0	0	0	0	0	0	0	0	0	0	0	0	0	0	0	0	0	0	0	0	0	0	0	0	0	0	0	0	0	0	0	0	0	0	0	0
k__Bacteria;p__Firmicutes;c__Clostridia;o__Clostridiales	0.0195001	0.00234177	0.0246011	0.000746397	0.00223618	0.00207449	0.00656296	0.00609967	0.0204138	0.0036082	0.00167819	0.00379262	0.0110799	0.0138761	0.0152118	0.00850769	0.00582234	0.00435943	0.0136742	0.010938	0.00497289	0.00478581	0.00547575	0.0293888	0	0.00638231	0.00816886	0.00100963	0.00446654	0.0128392	0.00239964	0.00220014	0.0021054	0.0187126	0.00181345	0.00445516	0.00297295	0.0207731	0.0989937	0.0145914	0.00133869	0.00607962	0.00154974	0.00213029	0.00532964	0.0181084	0.00585992	0.0269471	0.00113282
k__Bacteria;p__Firmicutes;c__Clostridia;o__Clostridiales	0.018871	0.0190777	0.00632032	0.0136361	0.0196287	0.0177952	0.0297858	0.0165315	0.11931	0.0213692	0.0183444	0.0542819	0.0990533	0.0444588	0.0259771	0.1152	0.0627398	0.00862989	0.0929032	0.0902663	0.0169977	0.031005	0.0127293	0.00981991	0.00610111	0.00875388	0.0194085	0.0214546	0.00407815	0.0654217	0.0139438	0.0449998	0.00801307	0.0556652	0.0200942	0.0495093	0.0711855	0.0562692	0.0920115	0.0764981	0.016689	0.0151667	0.0147821	0.0506376	0.0677542	0.0140312	0.0215326	0.0176702	0.015419
k__Bacteria;p__Firmicutes;c__Clostridia;o__Clostridiales;f__Clostridiaceae;g__Clostridium	0	0	0.000538503	0	0	0	0	0	0.00102069	0	0	0	0	0	0	0	0	0	0	0	0	0	0.000284455	0	0	0.000627768	0	0	0	0	0	0.00037815	0	0	0.00116997	0	9.90982e-05	0	0	0	0.00160643	0	0.00077487	0	0	0	0	0.000509719	0.000157337
k__Bacteria;p__Firmicutes;c__Clostridia;o__Clostridiales;f__Clostridiaceae;g__Clostridium;s__disporicum	0.000264857	0.00231055	0	0	0.00134881	0.00126414	0.00375477	0.000797117	0.00148966	0.00146194	0.000347212	0.000474078	0	0	0.000321788	0.000665096	0.0116719	0.00252076	0	0	0.0018543	0.0253971	0.00718248	0	0.00107306	0.00142992	0.00432294	0.00540872	0.0075737	0.00466881	0.000875543	0.00563787	0.00194828	0	0	0	0.00654048	0	0.00158299	0.00030526	0.00139819	0	0.0246766	0.0141924	0	0.0137741	0.00124827	0.0016311	0.00465716
k__Bacteria;p__Firmicutes;c__Clostridia;o__Clostridiales;f__Eubacteriaceae;g__Anaerofustis	0	0	0.000425134	0	0.00056792	0	0	0	0	0	0	0	0	0	0	0	0.000244865	0	0	0	0	0	0	0	0.00027593	0	0	0	0	0	0	0	0	0	0	0	0.000231229	0	0.000197874	0	0	0	0	0	0	0	0	0	0
k__Bacteria;p__Firmicutes;c__Clostridia;o__Clostridiales;f__Lachnospiraceae	0.0167522	0.0405283	0.0495706	0.0187748	0.00979661	0.0190593	0.0363487	0.0416927	0.0875034	0.00230178	0.00491884	0.0320003	0.0282609	0.048797	0.0270594	0.0248303	0.0472317	0.0138197	0.0272232	0.0897691	0.0134015	0.00384627	0.00721803	0.00535309	0.016893	0.0382939	0.0399797	0.0165146	0.00617548	0.033878	0.0365458	0.0136478	0.0433334	0.0677603	0.0280207	0.045791	0.0229908	0.0382678	0.111234	0.0189566	0.0202886	0.0205996	0.00396376	0.0427786	0.0240865	0.0365106	0.012344	0.0554914	0.0172441
k__Bacteria;p__Firmicutes;c__Clostridia;o__Clostridiales;f__Lachnospiraceae;g__Butyrivibrio;s__crossotus	0	0	0	0	0	0	0	0	0	0	0	0	0	0	0	0	0	0	0	0	0	0	0	0	0	0	0	0	0	0	0	0	0	0	0	0	0	0	0	0	0	0	0	0	0	0	0	0	0
k__Bacteria;p__Firmicutes;c__Clostridia;o__Clostridiales;f__Lachnospiraceae;g__Clostridium	0.0945208	0.177881	0.186379	0.0149854	0.01434	0.0218145	0.0182375	0.102585	0.00984828	0.0196274	0.0151905	0.00389421	0.0100631	0.134976	0.0532705	0.0208397	0.0244048	0.00207592	0.0107328	0.0348856	0.0507684	0.00778062	0.0355568	0.151411	0.0115584	0.0622886	0.128436	0.00951935	0.0357323	0.0285964	0.00729619	0.015401	0.0449046	0.0239399	0.00231068	0.00984826	0.00303901	0.0298036	0.0249039	0.0228945	0.00865685	0.00996022	0.00968588	0.016812	0.026766	0.0347842	0.101179	0.0443455	0.010573
k__Bacteria;p__Firmicutes;c__Clostridia;o__Clostridiales;f__Lachnospiraceae;g__Clostridium;s__bolteae	0	0	0.00104866	0	0	0	0	0	0	0	0	0	0	0	0	0	0	0	0	0	0	0	0	0.0036869	0	0	0	0	0.00469958	0	0	0	0	0	0	0	0	0	0	0	0	0	0	0	0	0	0	0	0
k__Bacteria;p__Firmicutes;c__Clostridia;o__Clostridiales;f__Lachnospiraceae;g__Clostridium;s__colinum	0	0	0	0	0	0	0	0	0	0	0	0	0	0	0	0	0	0	0	0	0.000477622	0.000998268	0	0	0	0	0	0	0	0.000437701	0	0	0	0	0.00105297	0	0	0	0	0	0	0	0	0	0	0	0	0	0
k__Bacteria;p__Firmicutes;c__Clostridia;o__Clostridiales;f__Lachnospiraceae;g__Clostridium;s__fimetarium	0	0	0	0	0	0	0	0	0.000772414	0	0	0	0	0	0.00166745	0	0	0	0	0.00370125	0	0	0	0	0	0	0	0	0	0	0	0	0	0	0	0	0	0	0	0.0016484	0	0	0	0	0	0	0	0	0
k__Bacteria;p__Firmicutes;c__Clostridia;o__Clostridiales;f__Lachnospiraceae;g__Clostridium;s__lavalense	0	0	0	0	0	0	0	0	0	0	0	0	0	0	0	0	0	0	0	0	0	0	0	0	0	0	0	0	0.0014759	0	0	0	0	0	0	0	0	0	0	0	0	0	0	0	0	0	0	0	0
k__Bacteria;p__Firmicutes;c__Clostridia;o__Clostridiales;f__Lachnospiraceae;g__Defluviitalea;s__saccharophila	0.00023175	0	0.00286257	0	0	0.00132897	0.00280819	0.00131698	0.00107586	0.00102647	0	0.00182859	0.000771388	0.00824565	0.00131641	0.00213385	0.00214937	0	0	0.00149155	0.000927149	0	0	0.00648752	0.000582518	0.0100094	0.0102558	0.000612988	0.00563172	0.00215932	0	0	0.00103699	0.00675657	0	0.00472314	0.00366663	0.00232468	0.000565355	0.00390732	0	0	0.000149014	0	0.000412238	0	0.00169903	0.00540302	0
k__Bacteria;p__Firmicutes;c__Clostridia;o__Clostridiales;f__Lachnospiraceae;g__Dorea;s__longicatena	0	0.0052768	0.0185642	0	0	0	0.0076042	0.00689679	0.00190345	0.0116333	0.00162032	0.00430057	0	0.00190757	0.00816171	0.010503	0.0154265	0.00412218	0	0.00607668	0.00424241	0	0.00366235	0	0	0.0122764	0	0.00201926	0	0.00618617	0.00324275	0.0007563	0.00304811	0.00197414	0	0	0.0016186	0.00238429	0.0191938	0.00677676	0.00223115	0	0	0	0.00279733	0.0116437	0	0.00139323	0
k__Bacteria;p__Firmicutes;c__Clostridia;o__Clostridiales;f__Lachnospiraceae;g__Lachnospira;s__pectinoschiza	0	0	0	0	0	0	0.00523775	0	0.00253793	0	0.000260409	0	0	0.000584579	0	0	0.000244865	0	0	0	0	0	0	0	0	0	0	0	0	0.000496061	0	0	0	0	0	0	0	0	0	0	0.00151718	0	0	0	0.0023262	0	0	0.000203887	0
k__Bacteria;p__Firmicutes;c__Clostridia;o__Clostridiales;f__Lachnospiraceae;g__Lactonifactor;s__longoviformis	0	0	0	0	0.0091932	0.000777933	0.0105702	0	5.51724e-05	0	0.00439802	0.106431	0.0147966	0.00273829	0.00781067	0.0100042	0	0.00940095	0.00219037	0.0308529	0	0	0	0	0	0	0	0	0.0100983	0.00481471	0.0261366	0	0.0014455	0.0373141	0	0.0197635	0	0.0358239	0.129523	0.00192314	0	0	0.00259284	0	0	0.00312213	0	0	0
k__Bacteria;p__Firmicutes;c__Clostridia;o__Clostridiales;f__Lachnospiraceae;g__Marvinbryantia;s__formatexigens	0.00314517	0.0121148	0.0060369	0.0167652	0.00528875	0	0.00388098	0.0179871	0.00102069	0.0244176	0	0.00352172	0	0.0047074	0.00617248	0.00235555	0.00195892	0	0.00416171	0.00301072	0	0	0.00704025	0.000886273	0.00318852	0.00296446	0	0.0264667	0	0.00195506	0	0.00130634	0.00270245	0.00133463	0.0272017	0.00646501	0.0052522	0	0.00356174	0.0208187	0	0.00181095	0	0	0	0	0	0	0
k__Bacteria;p__Firmicutes;c__Clostridia;o__Clostridiales;f__Lachnospiraceae;g__Roseburia;s__inulinivorans	0	0	0	0	0	0.00382484	0.0149875	0.00228738	0.00129655	0	0	0.00629847	0	0.00249215	0	0	0	0	0	0	0	0	0.00113782	0	0	0.00149967	0.00286208	0	0	0.0231981	0	0.00182199	0	0.0152092	0	0.00696747	0	0.0273299	0	0.00286944	0	0	0	0	0	0	0	0	0
k__Bacteria;p__Firmicutes;c__Clostridia;o__Clostridiales;f__Lachnospiraceae;g__Ruminococcus	0	0	0	0	0	0	0	0	0	0	0	0	0	0	0	0	0	0	0	0	0	0	0	0	0	0	0	0	0	0	0	0	0	0	0	0	0	0	0.0104308	0	0	0	0	0	0	0	0	0	0
k__Bacteria;p__Firmicutes;c__Clostridia;o__Clostridiales;f__Lachnospiraceae;g__Ruminococcus;s__gauvreauii	0	0	0	0	0	0	0	0	0	0	0	0	0	0	0	0	0	0	0	0	0	0	0	0	0	0	0	0	0	0	0	0	0	0	0	0	0	0	0	0	0	0	0	0	0	0	0	0	0
k__Bacteria;p__Firmicutes;c__Clostridia;o__Clostridiales;f__Lachnospiraceae;g__Ruminococcus;s__lactaris	0.0662804	0.178537	0.00612193	0.0352242	0.0347851	0.0863181	0.00309217	0.154675	0.00744828	0.0739681	0.0134545	0.0407369	0.0449158	0.0463664	0.0924702	0.0517944	0.0175758	0.0805457	0.0143939	0.07118	0.0387998	0.010658	0.0598421	0.0109898	0.123954	0.134168	0.0180669	0.0425846	0.0341787	0.0279253	0.0847331	0.0467187	0.032178	0.19405	0.095908	0.135129	0.0388465	0.11537	0.00522953	0.0487805	0.0452774	0.0199851	0	0.0753087	0.0676364	0.0180716	0.0332871	0.169634	0.0441801
k__Bacteria;p__Firmicutes;c__Clostridia;o__Clostridiales;f__Lachnospiraceae;g__Shuttleworthia;s__satelles	0	0	0	0	0	0	0	0	0	0	0	0	0	0	0	0	0	0	0	0	0	0	0	0	0	0	0	0	0	0	0	0	0	0	0	0	0	0	0	0	0	0	0	0	0	0	0	0	0
k__Bacteria;p__Firmicutes;c__Clostridia;o__Clostridiales;f__Peptococcaceae;g__rc4-4	0	0	0	0	0	0.00136138	0	0	0.000717241	0	0.00457163	0.00237039	0.0022791	0.00129223	0	0	0	0	0	0	0	0	0	0	0	0	0	0.000721163	0	0.00020426	0.00168623	0	0	0	0	0.00120591	0	0	0.000197874	0.000915779	0	0	0	0	0	0	0	0	0
k__Bacteria;p__Firmicutes;c__Clostridia;o__Clostridiales;f__Peptostreptococcaceae	0	0	0	0	0	0	0	0	0	0	0	0	0	0	0	0	0	0.00014828	0	0	0	0	0	0	0	0	0	0	0	0	0	0	0	0	0	0	0	0	0	0	0	0	0	0	0	0	0	0	0
k__Bacteria;p__Firmicutes;c__Clostridia;o__Clostridiales;f__Peptostreptococcaceae;g__Clostridium;s__ruminantium	0.00711803	0.00808693	0.000566845	0.00953092	0.0063891	0.0153966	0.0230966	0.0052679	0.0097931	0.0250708	0.0492173	0.10125	0.0164095	0.0138453	0.0232857	0.01272	0.187485	0.215243	0.148069	0.131671	0.0321692	0	0.0641445	0.0118406	0.000735813	0.0101489	0.0700614	0.0352648	0.0808638	0.0536329	0.0513328	0.155179	0.072589	0.0588906	0.00488461	0.0236157	0.152842	0.0142461	0.00353347	0.0897158	0.00121969	0.0197264	0	0.00385756	0	0.0510193	0.00436893	0.0154615	0.011108
k__Bacteria;p__Firmicutes;c__Clostridia;o__Clostridiales;f__Ruminococcaceae	0.0208906	0.0381553	0.0156449	0.0352816	0.0267987	0.0274221	0.031111	0.0622097	0.0217931	0.00566114	0.00801481	0.00877044	0.012237	0.0124915	0.018693	0.0221976	0.0151	0.00901542	0.0367044	0.0511269	0.015902	0.00252503	0.0220808	0.0403077	0.0174755	0.0192864	0.00658875	0.013053	0.0208568	0.0178874	0.0164083	0.0180137	0.0215882	0.0223273	0.0135424	0.0203665	0.0269877	0.0191339	0.0483661	0.0394395	0.0488472	0.0449504	0.0471777	0.00788784	0.142045	0.0337925	0.0199029	0.0153595	0.0206426
k__Bacteria;p__Firmicutes;c__Clostridia;o__Clostridiales;f__Ruminococcaceae	0.111571	0.0426515	0.00583851	0.0178848	0.0191318	0.0646008	0.0147351	0.0249532	0.0773793	0.1033	0.0828101	0.0544513	0.0254208	0.0246754	0.0161187	0.0216988	0.151925	0.0298636	0.0136429	0.047039	0.0521451	0.0662086	0.0912032	0.00826007	0.0312414	0.020821	0.0156222	0.0788591	0.00784557	0.0139481	0.113496	0.0582351	0.0460045	0.0838871	0.00921349	0.0274344	0.119975	0.0696808	0.0149254	0.0627309	0.103942	0.0134851	0.0176134	0.0444771	0.0380142	0.0422406	0.0400139	0.0175003	0.056358
k__Bacteria;p__Firmicutes;c__Clostridia;o__Clostridiales;f__Ruminococcaceae;g__Butyricicoccus;s__pullicaecorum	0.00347625	0.00421519	0	0	0.000745395	0.00670967	0.00170385	0.0128578	0.00308966	0	0.000752293	0.00213335	0.00915147	0.00378438	0.0124035	0.0594984	0.000789008	0.0497331	0.0437762	0.0155508	0.0310173	0	0.0120538	0	0.0247417	0.0313535	0.00810924	0.0152886	0	0	0.00599909	0.00598164	0.00942714	0.0594467	0.0300097	0.0429773	0.0479966	0.0211904	0	0.0281755	0	0.00410698	0	0	0.000206119	0.000661157	0.000450763	0.0174324	0.00135309
k__Bacteria;p__Firmicutes;c__Clostridia;o__Clostridiales;f__Ruminococcaceae;g__Clostridium	0	0	0	0	0	0	0	0	0	0	0.00214114	0.000948156	0	0.000707649	0	0.00047111	0.00165964	0	0	0.000718153	0.00067429	0	0	0	0	0	0	0	0	0	0	0	0	0.000639511	0	0	0	0.00157959	0.0111092	0.0101651	0	0	0	0	0	0.00550964	0	0.000611662	0
k__Bacteria;p__Firmicutes;c__Clostridia;o__Clostridiales;f__Ruminococcaceae;g__Clostridium;s__islandicum	0.0149313	0.0108034	0.000425134	0	0	0.0063207	0	0	0.00361379	0.00531898	0.00303811	0.00179472	0.00269986	0	0.00430026	0.00182901	0.00244865	0	0.00059453	0.00229256	0.00191049	0.00889633	0	0.00230431	0.00714351	0	0	0	0	0	0	0.00519097	0	0.0116502	0	0	0.000825818	0.00840461	0.0245647	0.00100736	0.0031831	0.00656469	0.00137092	0	0.00212008	0	0.000520111	0.00197091	0
k__Bacteria;p__Firmicutes;c__Clostridia;o__Clostridiales;f__Ruminococcaceae;g__Clostridium;s__methylpentosum	0.00787949	0.00034346	0.0111385	0.00126313	0.00415291	0.00042138	0.00826681	0.000277258	0.00844138	0.00158636	0.0028645	0.000880431	0.000490884	0.0077226	0.00459279	0.00108078	0.00408108	0.000504152	0.00234683	0.00394984	0.00449527	0.00123315	0.000924477	0.00241066	0	0.00313884	0.0167551	0	0.000116518	0.00443537	0.000356703	0.000584413	0.000911291	0.00141805	0.0128696	0.00113891	0.00155254	0.00149018	0.0178087	0.0022284	0.0033021	0	0	0.000460604	0.000323901	0.00521579	0.00214979	0.00533506	0
k__Bacteria;p__Firmicutes;c__Clostridia;o__Clostridiales;f__Ruminococcaceae;g__Papillibacter;s__cinnamivorans	0.0125145	0.00437131	0.00544171	0.000258368	0	0	0.00160919	0.00450544	0.00513103	0.000404367	0.00219901	0.00223494	0.00045582	0.00184604	0.00119939	0.000665096	0	0	0	0.000939123	0.000955244	0	0.00248898	0.00102808	0.00177821	0.0050919	0.00113291	0	0	0.00198424	0.000453985	0.00357523	0.00163404	0	0.00198894	0.00013399	6.60655e-05	0.00074509	0.00152646	0.00250313	0	0	0	8.63632e-05	0.00288566	0	0	0.00428164	0
k__Bacteria;p__Firmicutes;c__Clostridia;o__Clostridiales;f__Ruminococcaceae;g__Ruminococcus	0	0	0	0	0	0	0	0	0	0	0	0	0	0	0	0	0	0	0	0	0	0	0	0	0	0	0	0	0	0	0	0	0	0	0	0	0	0	0	0	0.000475978	0	0	0	0	0	0	0	0
k__Bacteria;p__Firmicutes;c__Clostridia;o__Clostridiales;f__Ruminococcaceae;g__Ruminococcus;s__albus	0.00589306	0.00521435	0	0.00146409	0.00358499	0	0.0324993	0	0.00402759	0.00208405	0	0	0.00718794	0	0.00122864	0.00548704	0	0.00154211	0.000688404	0.0012982	0.0061248	0.0109222	0.0137605	0	0.0146856	0.000662644	0	0.0108896	0	0.0106507	0	0	0.00040851	0	0.0131621	0.00723545	0.0038318	0	0	0.000763149	0.0138629	0	0	0.0018712	0.0023262	0	0	0.0215781	0.00556972
k__Bacteria;p__Firmicutes;c__Clostridia;o__Clostridiales;f__Ruminococcaceae;g__Sporobacter;s__termitidis	0.00172157	0	0	0.000516737	0	0.000615863	0.00069416	0	0	0	0	0	0.00129734	0	0.00187222	0.00121934	0	0	0.00190876	0	0.00160144	0	0.00188451	0	0.000766471	0	0	0.000432698	0	0	0	0	0	0	0.000789728	0	0	0	0.00101764	0.00122104	0	0	0.000625857	0	0	0	0	0.000679625	0
k__Bacteria;p__Firmicutes;c__Clostridia;o__Clostridiales;f__Ruminococcaceae;g__Subdoligranulum;s__variabile	0	0.000967933	0	0	0	0	0	0	0	0	0.0020254	0.00101588	0	0	0	0	0	0	0	0	0	0.000557855	0	0	0	0	0.000327947	0	0	0	0.00025942	0	0	0.00108439	0	0	0	0.00113254	0	0	0	0	0	0	0	0	0	0	0
k__Bacteria;p__Firmicutes;c__Erysipelotrichi;o__Erysipelotrichales;f__Erysipelotrichaceae	0.00258235	0.00227933	0	0.00370328	0.00319455	0.00217173	0.00201937	0.00918417	0.000772414	0.00320383	0.00107057	0.00243812	0	0.000892253	0.0016967	0.00266039	0	0	0.000907441	0.00386698	0.00325907	0	0.00565353	0.00152439	0.00346445	0.0069752	0.00181862	0.00793279	0.00151474	0	0	0.00103132	0.000817019	0.00525511	0.00146246	0.00425418	0.000198196	0.00339761	0	0.00256418	0.000565224	0.00200498	0	0.000834845	0.00538853	0	0	0.00197091	0.00106989
k__Bacteria;p__Firmicutes;c__Erysipelotrichi;o__Erysipelotrichales;f__Erysipelotrichaceae;g__Anaerorhabdus;s__furcosa	0	0	0.00430802	0.000287076	0	0	0	0	0.000551724	0.000404367	0	0	0	0.000338441	0.000263281	0	0.00193171	0.000118624	0	0.00088388	0	0.00137996	0	0.00737379	0	0	0	0	0.00116518	0.000379341	0.00119982	0.00099694	0	0	0.0017842	0	0.00561557	0	0	0.000885253	0.00113045	0	0	0	0.000588911	0.00150597	0.00322469	0.000305831	0
k__Bacteria;p__Firmicutes;c__Erysipelotrichi;o__Erysipelotrichales;f__Erysipelotrichaceae;g__Clostridium	0	0	0	0.000344491	0.000177475	0	0	0	0	0	0	0	0	0	0	0	0	0	0	0	0	0	0	0.00280062	0	0	0.000626081	0	0.00302948	0	0	0	0	0	0	0	0	0	0	0	0	0.00116418	0	0.00218787	0	0	0	0	0.000188804
k__Bacteria;p__Firmicutes;c__Erysipelotrichi;o__Erysipelotrichales;f__Erysipelotrichaceae;g__Clostridium;s__saccharogumia	0.00705181	0.0118338	0.00439305	0.0343343	0.00724098	0.00800622	0.0171331	0.00582242	0.000358621	0.0065943	0.00309598	0.00700958	0	0.00286136	0.00102387	0.00299293	0.00160522	0.00886714	0.00137681	0.0035079	0.0114067	0	0.0104181	0.0144285	0.0127847	0.0275869	0.00208694	0.0339668	0.00469958	0.00574847	0.00402101	0.00240641	0.00641046	0.00658974	0.00435813	0.0026128	0.00155254	0.00637797	0.00234622	0.0016484	0.00339134	0.00992789	0.0167491	0.0196332	0.00550632	0	0.00724688	0.00288841	0.00280059
k__Bacteria;p__Firmicutes;c__Erysipelotrichi;o__Erysipelotrichales;f__Erysipelotrichaceae;g__Holdemania	0	9.3671e-05	0	0	0.0007099	0	0	0.00100506	0	0	0	0.000338627	0.000280505	0	0	0	0	0	0	0	0	0	0	0	0	0	8.94401e-05	0	0.000466074	0	0	0	0.000282814	0	0	0	0	0	0	0	0	0	0	0	0	0	0	0.000373794	0
k__Bacteria;p__Proteobacteria;c__Alphaproteobacteria	0	0	0.000453476	0	0	0.00162069	0	0	0.000331034	0	0.00150459	0	0.000350631	0.000276906	0	0	0	0	0	0	0	0.000411051	0.000640023	0	0	0	0.000327947	0.000540872	0.000699111	0	0	0	0	0	0	0	0	0	0	0	0.000505727	0	0	0	0	0	0.00197642	0	0
k__Bacteria;p__Proteobacteria;c__Alphaproteobacteria;o__Rickettsiales;f__mitochondria	0	0	0	0	0	0	0	0	0	0	0	0	0	0	0	0	0	0	0	0	0.000196668	0	0	0	0	0	0	0	0	0	0	0	0	0	0	0	0	0	0	0	0	0	0	0	0	0	0	0	0
k__Bacteria;p__Proteobacteria;c__Gammaproteobacteria;o__Enterobacteriales;f__Enterobacteriaceae	0.000695249	0	0	0	0.00166826	0.00126414	0.000473291	0.000797117	0.000358621	0.00174189	0	0	0.00382188	0.000369208	0	0.000526535	0	0	0	0	0.00193858	0	0.00160006	0.00109898	0.000950425	0	0	0	0.000543753	0.000379341	0.000810688	0	0	0	0.000467987	0.00053596	0	0.000298036	0	0.000915779	0	0.00329852	0	0.00025909	0	0	0.0026699	0.000849531	0
k__Bacteria;p__Proteobacteria;c__Gammaproteobacteria;o__Enterobacteriales;f__Enterobacteriaceae;g__Proteus;s__myxofaciens	0	0	0	0	0	0	0	0	0	0	0.00046295	0.00365717	0.000315568	0	0	0	0	0	0	0	0	0	0	0	0	0	0	0	0	0	0	0	0	0	0	0	0	0	0	0	0	0	0	0	0	0	0	0	0
k__Bacteria;p__Proteobacteria;c__Gammaproteobacteria;o__Pseudomonadales;f__Moraxellaceae;g__Psychrobacter	0	0	0	0	0	0	0	0	0	0	0	6.77254e-05	0	0	0	0	0	0	0	0	0	0	0	0	0	0	0	0	0	0	0	0	0	0	0	0	0	0	0	0	0	0	0	0	0	0	0	0	0
k__Bacteria;p__Tenericutes;c__Mollicutes	0.00612481	0	0.00184225	0	0	0.0063207	0	0.00280724	0.00115862	0	0	0	0.00291024	0	0	0	0	0	0	0	0.00067429	0	0.000746693	0	0	0.00505702	0	0.000288465	0	0	0	0	0	0	0.00508936	0	0	0	0.00217662	0	0.000713967	0.0157811	0.00128152	0	0.000471129	0.00168962	0	0.00132527	0
k__Bacteria;p__Tenericutes;c__Mollicutes;o__Acholeplasmatales;f__Acholeplasmataceae;g__Acholeplasma	0	0	0	0	0.000816384	0	9.46581e-05	0	0	0	0	0	0	0	0	0.000138562	0.0011427	0.00044484	0	0.000276213	0	0	0	0	0	0	0	0	0	0.000904581	0.000226993	0	0	0	0	0	0	0	0	0	0	0	0	0	0	0	0	0	0
k__Bacteria;p__Verrucomicrobia;c__Verrucomicrobiae;o__Verrucomicrobiales;f__Verrucomicrobiaceae	0	0	0	0	0	0.00132897	0	0	0	0	0	0	0	0	0	0	0	0	0	0	0	0.00035233	0	0	0	0.000279008	0	0	0	0.000379341	0	0	0	0	0	0	0	0	0.000424016	6.10519e-05	0.000237989	0	0	0	0	0	0	0	0
k__Bacteria;p__Verrucomicrobia;c__Verrucomicrobiae;o__Verrucomicrobiales;f__Verrucomicrobiaceae;g__Akkermansia;s__muciniphila	0.0684324	0.0736566	0.00666043	0.0190044	0.0912576	0.209556	0.0207301	0.0242947	0.12389	0.219914	0.21831	0.362737	0.0286816	0.0060304	0.0349286	0.0479424	0.000435315	0.0190688	0	0	0.0174473	0.0332658	0.0370502	0.114755	0.0184566	0.0372476	0.0474927	0.011178	0.144871	0.0202218	0.104449	0.256832	0.183578	0	0.0416508	0	0	0	0.0621325	0.0849843	0.123814	0.0426867	0.0899446	0.0476437	0.0861577	0.0639853	0.153779	0.057972	0.0527392
k__Bacteria;p__Verrucomicrobia;c__Verrucomicrobiae;o__Verrucomicrobiales;f__Verrucomicrobiaceae;g__Haloferula	0	0	0	0	0.000106485	0.000972416	0.000220869	0	0	0	0.00066549	0.000440215	0	0	0.000380295	0	0	0	0	0	0.000112382	0	0.000711136	0.000496313	0.000398565	0	0	0	0.000155358	0	0.00181594	0.00343773	0.00710178	0	0	0	0	0	0	0.000122104	0	0	0.000387435	0.000431816	0	0	0.000416089	0	0
k__Bacteria;p__Verrucomicrobia;c__Verrucomicrobiae;o__Verrucomicrobiales;f__Verrucomicrobiaceae;g__Haloferula;s__rosea	0.000397285	0.00187342	0	0	0	0.000875174	6.31054e-05	0.000346572	0.000193103	0	0	0.00101588	0.000140252	0	0.000351041	0	0	0	0	0	0	0	0	0.000531764	0	0	8.94401e-05	0	0	5.83601e-05	0.000940398	0	0	0	0.000497236	0	0	0	0.000141339	0.000366312	0.00139819	0	0.000149014	5.75755e-05	0	0	0.00017337	0	0.000346141
[truncated: 31 more columns]

## Sheet: Table S3
Table S3: Relative abundance of the identified phyla in each sample. NS, Normal saline control group; PPA+NS; propionic acid control group; PPA+BF, Bifidobacterium treated group; PPA+FT, fecal microbiota transplantation treated group.
ID →	S1	S2	S3	S4	S5	S6	S7	S8	S9	S10	S11	S12	S13	S14	S15	S16	S17	S18	S19	S20	S21	S22	S23	S24	S25	S26	S27	S28	S29	S30	S31	S32	S33	S34	S35	S36	S37	S38	S39	S40	S41	S42	S43	S44	S45	S46	S47	S48	S49
Group →	NS	NS	NS	NS	NS	NS	NS	NS	NS	NS	NS	NS	NS	NS	NS	NS	NS	NS	NS	NS	PPA+NS	PPA+NS	PPA+NS	PPA+NS	PPA+NS	PPA+NS	PPA+NS	PPA+NS	PPA+NS	PPA+NS	PPA+NS	PPA+NS	PPA+NS	PPA+NS	PPA+NS	PPA+NS	PPA+NS	PPA+NS	PPA+NS	PPA+NS	PPA+BF	PPA+BF	PPA+BF	PPA+BF	PPA+BF	PPA+BF	PPA+BF	PPA+BF	PPA+BF
Time →	0	0	0	0	0	4	4	4	4	4	18	18	18	18	18	33	33	33	33	33	0	0	0	0	0	4	4	4	4	4	18	18	18	18	18	33	33	33	33	33	0	0	0	0	0	4	4	4	4
Firmicutes	0.479887	0.579417	0.39682	0.423638	0.37898	0.427409	0.506295	0.536563	0.542538	0.474167	0.274934	0.548204	0.41946	0.729094	0.585274	0.698573	0.914161	0.92073	0.902059	0.812811	0.422976	0.427816	0.508605	0.431154	0.69473	0.583406	0.644565	0.576858	0.431429	0.521681	0.563785	0.605452	0.653427	0.825664	0.730674	0.719727	0.72203	0.570828	0.714637	0.761318	0.489871	0.47324	0.44114	0.332786	0.428933	0.641065	0.491852	0.539452	0.504578
Bacteroidetes	0.436716	0.338246	0.586827	0.552277	0.517197	0.341253	0.416054	0.430443	0.328414	0.297708	0.499552	0.0795774	0.543128	0.261892	0.372982	0.246557	0.0691879	0.0533215	0.095031	0.182079	0.549406	0.531871	0.424442	0.440194	0.276635	0.371918	0.2747	0.38831	0.410805	0.44984	0.326318	0.12644	0.123778	0.171806	0.215683	0.273172	0.270307	0.423479	0.213308	0.14918	0.378075	0.458817	0.460929	0.610214	0.479992	0.272323	0.336755	0.372468	0.405456
Verrucomicrobia	0.0688297	0.07553	0.00666043	0.0190044	0.0913641	0.212732	0.0210141	0.0246413	0.124083	0.219914	0.218975	0.364194	0.0288219	0.0060304	0.03566	0.0479424	0.000435315	0.0190688	0	0	0.0175596	0.0336181	0.0377613	0.115783	0.0188552	0.0375266	0.0475821	0.011178	0.145027	0.0206595	0.107205	0.26027	0.19068	0	0.0421481	0	0	0	0.0626979	0.0855337	0.12545	0.0426867	0.090481	0.0481331	0.0861577	0.0639853	0.154369	0.057972	0.0530854
Tenericutes	0.00612481	0	0.00184225	0	0.000816384	0.0063207	9.46581e-05	0.00280724	0.00115862	0	0	0	0.00291024	0	0	0.000138562	0.0011427	0.00044484	0	0.000276213	0.00067429	0	0.000746693	0	0	0.00505702	0	0.000288465	0	0.000904581	0.000226993	0	0	0	0.00508936	0	0	0	0.00217662	0	0.000713967	0.0157811	0.00128152	0	0.000471129	0.00168962	0	0.00132527	0
Deferribacteres	0.00453567	0	0.00133209	0.000315783	0.00305257	0	0.000631054	0	0.000689655	0	0	0	0	0	0	0	0	0	0	0	0	0.00428668	0	0.00131168	0	0	0.000387574	0	0	0.000817041	0	0	0	0	0	0	0	0	0	0	0.00065447	0.000452737	0	0	0.000618356	0.000293848	0.000797503	0.00135925	0
Actinobacteria	0.00321139	0.00680676	0.00606524	0.00476546	0.00692152	0.00940002	0.0554381	0.00474804	0.00242759	0.00646987	0.00457163	0.00430057	0.00119215	0.00233832	0.00608472	0.00626299	0.0150728	0.00643535	0.00291007	0.00483372	0.00724862	0.00199654	0.0262054	0.010458	0.00882975	0.00209256	0.0324369	0.0228248	0.0114965	0.00571929	0.0016538	0.00783801	0.0321151	0.00253024	0.00593758	0.0065655	0.00766359	0.00539445	0.00718001	0.0030526	0.00473003	0.00572389	0.00616916	0.00860754	0.00382792	0.0206428	0.0115811	0.0265733	0.0368797
Proteobacteria	0.000695249	0	0.000453476	0	0.00166826	0.00288483	0.000473291	0.000797117	0.000689655	0.00174189	0.00196754	0.0037249	0.00448808	0.000646114	0	0.000526535	0	0	0	0	0.00213525	0.000411051	0.00224008	0.00109898	0.000950425	0	0.000327947	0.000540872	0.00124286	0.000379341	0.000810688	0	0	0	0.000467987	0.00053596	0	0.000298036	0	0.000915779	0.000505727	0.00329852	0	0.00025909	0	0	0.00464632	0.000849531	0
[truncated: 31 more columns]

## Sheet: Table S4
Table S4: Relative abundance of the identified genera in each sample. NS, Normal saline control group; PPA+NS; propionic acid control group; PPA+BF, Bifidobacterium treated group; PPA+FT, fecal microbiota transplantation treated group.
ID →	S1	S2	S3	S4	S5	S6	S7	S8	S9	S10	S11	S12	S13	S14	S15	S16	S17	S18	S19	S20	S21	S22	S23	S24	S25	S26	S27	S28	S29	S30	S31	S32	S33	S34	S35	S36	S37	S38	S39	S40	S41	S42	S43	S44	S45	S46	S47	S48	S49
Group →	NS	NS	NS	NS	NS	NS	NS	NS	NS	NS	NS	NS	NS	NS	NS	NS	NS	NS	NS	NS	PPA+NS	PPA+NS	PPA+NS	PPA+NS	PPA+NS	PPA+NS	PPA+NS	PPA+NS	PPA+NS	PPA+NS	PPA+NS	PPA+NS	PPA+NS	PPA+NS	PPA+NS	PPA+NS	PPA+NS	PPA+NS	PPA+NS	PPA+NS	PPA+BF	PPA+BF	PPA+BF	PPA+BF	PPA+BF	PPA+BF	PPA+BF	PPA+BF	PPA+BF
Time →	0	0	0	0	0	4	4	4	4	4	18	18	18	18	18	33	33	33	33	33	0	0	0	0	0	4	4	4	4	4	18	18	18	18	18	33	33	33	33	33	0	0	0	0	0	4	4	4	4
k__Bacteria;p__Actinobacteria;c__Actinobacteria;o__Bifidobacteriales;f__Bifidobacteriaceae;g__Bifidobacterium	0.000695249	0.000967933	0.00192727	0.0037894	0.00166826	0.00764967	0.0534818	0.00128232	0.00124138	0.00503904	0.00237262	0.00186245	0.00119215	0.00135376	0.00204774	0.00193986	0.00087063	0.00450771	0	0.00146393	0.00292192	0.000968907	0.0238942	0.010458	0.00554925	0.00122066	0.0324369	0.0228248	0.0114965	0.00408521	0.00100525	0.00391901	0.0246677	0.000917559	0.00470912	0.00438817	0.00224623	0.000715286	0.00197874	0.000579993	0	0.00307215	0.00265244	0.00644846	0.000500574	0.0153903	0.0106796	0.0243306	0.0368797
k__Bacteria;p__Actinobacteria;c__Coriobacteriia;o__Coriobacteriales;f__Coriobacteriaceae;g__Eggerthella	0	0	0	0	0	0	0	0	0	0	0	0	0	0	0	0	0	0	0	0	0	0	0	0	0	0	0	0	0	0	0	0	0	0	0	0	0	0	0	0	0	0	0	0.000834845	0	0	0	0	0
k__Bacteria;p__Actinobacteria;c__Coriobacteriia;o__Coriobacteriales;f__Coriobacteriaceae;g__Enterococcus	0	0.000562026	0	0.000976058	0.000532425	0	0.000220869	0	0	0	0	0	0	0	0	0.000221699	0.000571351	0	0	0	0	0	0	0	0	0	0	0	0	0	0	0	0	0	0	0	0	0	0	0	0	0	0	0	0	0	0	0	0
k__Bacteria;p__Actinobacteria;c__Coriobacteriia;o__Coriobacteriales;f__Coriobacteriaceae;g__Paraeggerthella	0.00251614	0.0052768	0.00413797	0	0.00472083	0.00175035	0.0017354	0.00346572	0.00118621	0.00143084	0.00219901	0.00243812	0	0.000984555	0.00403698	0.00410143	0.0136308	0.00192764	0.00291007	0.00336979	0.00432669	0.00102763	0.00231119	0	0.0032805	0.0008719	0	0	0	0.00163408	0.00064855	0.00391901	0.00744744	0.00161268	0.00122847	0.00217734	0.00541737	0.00467916	0.00520127	0.0024726	0.00473003	0.00265175	0.00351672	0.00132424	0.00332735	0.00525253	0.000901526	0.00224276	0
k__Bacteria;p__Bacteroidetes;c__Bacteroidia;o__Bacteroidales;f__Bacteroidaceae;g__Bacteroides	0.0996524	0.0202329	0.164073	0.0771947	0.0812125	0.049107	0.0691635	0.0697997	0.017269	0.0335936	0.220885	0.00992178	0.0795582	0.0336287	0.199596	0.0387973	0.0161611	0.0163998	0.0127355	0.0568169	0.189054	0.168971	0.065069	0.102453	0.103167	0.08297	0.0208992	0.0812029	0.114072	0.089787	0.0684221	0.0143353	0.0386513	0.0317531	0.086987	0.0471644	0.0368315	0.0805293	0.0197309	0.0249702	0.0894244	0.115319	0.136705	0.10165	0.047849	0.0204591	0.0379681	0.0143741	0.0912867
k__Bacteria;p__Bacteroidetes;c__Bacteroidia;o__Bacteroidales;f__Porphyromonadaceae;g__Macellibacteroides	0	0	0	0	0	0	0	0	0	0	0.000549753	0	0	0	0	0	0	0	0	0	0	0	0	0	0	0	0	0	0	0	0	0	0	0	0	0	0	0	0	0	0	0	0	0	0	0	0	0	0
k__Bacteria;p__Bacteroidetes;c__Bacteroidia;o__Bacteroidales;f__Porphyromonadaceae;g__Parabacteroides	0.00854163	0.00583882	0.00306096	0.00499512	0.00259113	0.0104373	0.00672073	0.0129965	0.0147034	0.00413699	0.0170713	0.0108361	0.0111851	0.00670728	0.00468055	0.00232784	0.000462522	0.00115658	0.000344202	0.000580046	0.00424241	0.0108635	0.00984924	0.0157757	0.00272864	0.00575454	0.0028919	0.00847366	0.015497	0.00939597	0.0128737	0.00299082	0.00534205	0.00255804	0.00602533	0.00998225	0.00621015	0.00739129	0.00146992	0.00442626	0.00473003	0.0027811	0.00917923	0.0137893	0.00291511	0.00367309	0.00766297	0.0155634	0.00387048
k__Bacteria;p__Bacteroidetes;c__Bacteroidia;o__Bacteroidales;f__Rikenellaceae;g__Alistipes	0.00834299	0.00152996	0	0.000229661	0.00028396	0	0.000441738	0	0	0	0	0	0	0.00104609	0.00119939	0.0015796	0.00108829	0	0	0	0	0.00205526	0	0	0	0	0.000864588	0	0	0.0103881	0	0.00209701	0.00122553	0	0	0.00170837	0	0	0.00025441	0.00958515	0.00139819	0	0.00163915	0	0	0.00653811	0	0	0
k__Bacteria;p__Deferribacteres;c__Deferribacteres;o__Deferribacterales;f__Deferribacteraceae;g__Mucispirillum	0.00453567	0	0.00133209	0.000315783	0.00305257	0	0.000631054	0	0.000689655	0	0	0	0	0	0	0	0	0	0	0	0	0.00428668	0	0.00131168	0	0	0.000387574	0	0	0.000817041	0	0	0	0	0	0	0	0	0	0	0.00065447	0.000452737	0	0	0.000618356	0.000293848	0.000797503	0.00135925	0
k__Bacteria;p__Firmicutes;c__Bacilli;o__Bacillales;f__Bacillaceae;g__Virgibacillus	0	0	0	0	0	0	0	0	0	0	0	0	0	0	0	0	0	0	0	0	0	0	0	0	0	0	0	0	0	0	0	0	0	0	0	0	0	0	0	0	0.000118994	0	0	0	0	0	0	0	0
k__Bacteria;p__Firmicutes;c__Bacilli;o__Bacillales;f__Planococcaceae;g__Staphylococcus	0	0.000124895	0	0	0	0.000972416	0.00403875	0.00277258	0.00311724	0.0177922	0.00402187	0.00619688	0.000876578	0	0	0	0	0	0	0.00066291	0	0	0	0	0	0.000383636	0	0	0	0	0.0821389	0.0510158	0.00958426	0	0	0	0	0	0	0	0	0	0	0	0	0	0	0	0
k__Bacteria;p__Firmicutes;c__Bacilli;o__Lactobacillales;f__Carnobacteriaceae;g__Isobaculum	0	0	0	0	0	0	0	0	0	0	0	0	0	0	0	0	0	0	0	0	0	0	0	0	0	0	0	0	0	0	0	0	0	0	0	0	0	0	0	0	0	0	0	0	0	0	0	0	0
k__Bacteria;p__Firmicutes;c__Bacilli;o__Lactobacillales;f__Lactobacillaceae;g__Lactobacillus	0.0557524	0.00677553	0.0311198	0.183413	0.177333	0.100515	0.137507	0.0473418	0.126593	0.112072	0.0207459	0.0456469	0.0885344	0.220879	0.158758	0.183456	0.138104	0.0520759	0.356499	0.147857	0.079791	0.181479	0.0950434	0.0816081	0.286139	0.109127	0.204281	0.114485	0.120286	0.102276	0.0454634	0.116126	0.236244	0.0728486	0.189535	0.153016	0.125557	0.0484904	0.0356456	0.180988	0.200357	0.233354	0.22954	0.040821	0.00235564	0.25348	0.14837	0.0771034	0.251392
k__Bacteria;p__Firmicutes;c__Bacilli;o__Lactobacillales;f__Lactobacillaceae;g__Pediococcus	0	0	0	0.00011483	0	0	0	0	0	0	0	0	0	0.000307673	5.85069e-05	0.00299293	0.000136036	0.00602017	6.25821e-05	8.28638e-05	0	0.000675299	0	0	0.0043229	0.000279008	8.94401e-05	0	0	0.00020426	0	0	0	5.56096e-05	0.00608383	0.00378521	0	0	0	0	0	0	0.000208619	0	0	0.00113866	0.000832178	0.000101944	0.00198244
k__Bacteria;p__Firmicutes;c__Bacilli;o__Lactobacillales;f__Streptococcaceae;g__Streptococcus	0	0	0	0	0.00216519	0	0	0	0	0.000248841	0	0.000711117	0.000666199	0	0	0	0.00155081	0	0.0014081	0.00118771	0	0	0	0	0	0	0	0.00057693	0	0.000379341	0.000810688	0.00113445	0.000345662	0.00136244	0.000584983	0	0	0	0.000424016	0	0	0	0	0.000431816	0.000618356	0	0.000381415	0	9.4402e-05
k__Bacteria;p__Firmicutes;c__Clostridia;o__Clostridiales;f__Clostridiaceae;g__Clostridium	0.000264857	0.00231055	0.000538503	0	0.00134881	0.00126414	0.00375477	0.000797117	0.00251034	0.00146194	0.000347212	0.000474078	0	0	0.000321788	0.000665096	0.0116719	0.00252076	0	0	0.0018543	0.0253971	0.00746693	0	0.00107306	0.00205768	0.00432294	0.00540872	0.0075737	0.00466881	0.000875543	0.00601602	0.00194828	0	0.00116997	0	0.00663958	0	0.00158299	0.00030526	0.00300461	0	0.0254515	0.0141924	0	0.0137741	0.00124827	0.00214082	0.0048145
k__Bacteria;p__Firmicutes;c__Clostridia;o__Clostridiales;f__Eubacteriaceae;g__Anaerofustis	0	0	0.000425134	0	0.00056792	0	0	0	0	0	0	0	0	0	0	0	0.000244865	0	0	0	0	0	0	0	0.00027593	0	0	0	0	0	0	0	0	0	0	0	0.000231229	0	0.000197874	0	0	0	0	0	0	0	0	0	0
k__Bacteria;p__Firmicutes;c__Clostridia;o__Clostridiales;f__Lachnospiraceae;g__Butyrivibrio	0	0	0	0	0	0	0	0	0	0	0	0	0	0	0	0	0	0	0	0	0	0	0	0	0	0	0	0	0	0	0	0	0	0	0	0	0	0	0	0	0	0	0	0	0	0	0	0	0
k__Bacteria;p__Firmicutes;c__Clostridia;o__Clostridiales;f__Lachnospiraceae;g__Clostridium	0.0945208	0.177881	0.187427	0.0149854	0.01434	0.0218145	0.0182375	0.102585	0.0106207	0.0196274	0.0151905	0.00389421	0.0100631	0.134976	0.054938	0.0208397	0.0244048	0.00207592	0.0107328	0.0385869	0.051246	0.00877888	0.0355568	0.155098	0.0115584	0.0622886	0.128436	0.00951935	0.0419078	0.0290341	0.00729619	0.015401	0.0449046	0.0239399	0.00336365	0.00984826	0.00303901	0.0298036	0.0249039	0.0245429	0.00865685	0.00996022	0.00968588	0.016812	0.026766	0.0347842	0.101179	0.0443455	0.010573
k__Bacteria;p__Firmicutes;c__Clostridia;o__Clostridiales;f__Lachnospiraceae;g__Defluviitalea	0.00023175	0	0.00286257	0	0	0.00132897	0.00280819	0.00131698	0.00107586	0.00102647	0	0.00182859	0.000771388	0.00824565	0.00131641	0.00213385	0.00214937	0	0	0.00149155	0.000927149	0	0	0.00648752	0.000582518	0.0100094	0.0102558	0.000612988	0.00563172	0.00215932	0	0	0.00103699	0.00675657	0	0.00472314	0.00366663	0.00232468	0.000565355	0.00390732	0	0	0.000149014	0	0.000412238	0	0.00169903	0.00540302	0
k__Bacteria;p__Firmicutes;c__Clostridia;o__Clostridiales;f__Lachnospiraceae;g__Dorea	0	0.0052768	0.0185642	0	0	0	0.0076042	0.00689679	0.00190345	0.0116333	0.00162032	0.00430057	0	0.00190757	0.00816171	0.010503	0.0154265	0.00412218	0	0.00607668	0.00424241	0	0.00366235	0	0	0.0122764	0	0.00201926	0	0.00618617	0.00324275	0.0007563	0.00304811	0.00197414	0	0	0.0016186	0.00238429	0.0191938	0.00677676	0.00223115	0	0	0	0.00279733	0.0116437	0	0.00139323	0
k__Bacteria;p__Firmicutes;c__Clostridia;o__Clostridiales;f__Lachnospiraceae;g__Lachnospira	0	0	0	0	0	0	0.00523775	0	0.00253793	0	0.000260409	0	0	0.000584579	0	0	0.000244865	0	0	0	0	0	0	0	0	0	0	0	0	0.000496061	0	0	0	0	0	0	0	0	0	0	0.00151718	0	0	0	0.0023262	0	0	0.000203887	0
k__Bacteria;p__Firmicutes;c__Clostridia;o__Clostridiales;f__Lachnospiraceae;g__Lactonifactor	0	0	0	0	0.0091932	0.000777933	0.0105702	0	5.51724e-05	0	0.00439802	0.106431	0.0147966	0.00273829	0.00781067	0.0100042	0	0.00940095	0.00219037	0.0308529	0	0	0	0	0	0	0	0	0.0100983	0.00481471	0.0261366	0	0.0014455	0.0373141	0	0.0197635	0	0.0358239	0.129523	0.00192314	0	0	0.00259284	0	0	0.00312213	0	0	0
k__Bacteria;p__Firmicutes;c__Clostridia;o__Clostridiales;f__Lachnospiraceae;g__Marvinbryantia	0.00314517	0.0121148	0.0060369	0.0167652	0.00528875	0	0.00388098	0.0179871	0.00102069	0.0244176	0	0.00352172	0	0.0047074	0.00617248	0.00235555	0.00195892	0	0.00416171	0.00301072	0	0	0.00704025	0.000886273	0.00318852	0.00296446	0	0.0264667	0	0.00195506	0	0.00130634	0.00270245	0.00133463	0.0272017	0.00646501	0.0052522	0	0.00356174	0.0208187	0	0.00181095	0	0	0	0	0	0	0
k__Bacteria;p__Firmicutes;c__Clostridia;o__Clostridiales;f__Lachnospiraceae;g__Roseburia	0	0	0	0	0	0.00382484	0.0149875	0.00228738	0.00129655	0	0	0.00629847	0	0.00249215	0	0	0	0	0	0	0	0	0.00113782	0	0	0.00149967	0.00286208	0	0	0.0231981	0	0.00182199	0	0.0152092	0	0.00696747	0	0.0273299	0	0.00286944	0	0	0	0	0	0	0	0	0
k__Bacteria;p__Firmicutes;c__Clostridia;o__Clostridiales;f__Lachnospiraceae;g__Ruminococcus	0.0662804	0.178537	0.00612193	0.0352242	0.0347851	0.0863181	0.00309217	0.154675	0.00744828	0.0739681	0.0134545	0.0407369	0.0449158	0.0463664	0.0924702	0.0517944	0.0175758	0.0805457	0.0143939	0.07118	0.0387998	0.010658	0.0598421	0.0109898	0.123954	0.134168	0.0180669	0.0425846	0.0341787	0.0279253	0.0847331	0.0467187	0.032178	0.19405	0.095908	0.135129	0.0388465	0.11537	0.0156603	0.0487805	0.0452774	0.0199851	0	0.0753087	0.0676364	0.0180716	0.0332871	0.169634	0.0441801
k__Bacteria;p__Firmicutes;c__Clostridia;o__Clostridiales;f__Lachnospiraceae;g__Shuttleworthia	0	0	0	0	0	0	0	0	0	0	0	0	0	0	0	0	0	0	0	0	0	0	0	0	0	0	0	0	0	0	0	0	0	0	0	0	0	0	0	0	0	0	0	0	0	0	0	0	0
k__Bacteria;p__Firmicutes;c__Clostridia;o__Clostridiales;f__Peptococcaceae;g__rc4-4	0	0	0	0	0	0.00136138	0	0	0.000717241	0	0.00457163	0.00237039	0.0022791	0.00129223	0	0	0	0	0	0	0	0	0	0	0	0	0	0.000721163	0	0.00020426	0.00168623	0	0	0	0	0.00120591	0	0	0.000197874	0.000915779	0	0	0	0	0	0	0	0	0
k__Bacteria;p__Firmicutes;c__Clostridia;o__Clostridiales;f__Peptostreptococcaceae;g__Clostridium	0.00711803	0.00808693	0.000566845	0.00953092	0.0063891	0.0153966	0.0230966	0.0052679	0.0097931	0.0250708	0.0492173	0.10125	0.0164095	0.0138453	0.0232857	0.01272	0.187485	0.215243	0.148069	0.131671	0.0321692	0	0.0641445	0.0118406	0.000735813	0.0101489	0.0700614	0.0352648	0.0808638	0.0536329	0.0513328	0.155179	0.072589	0.0588906	0.00488461	0.0236157	0.152842	0.0142461	0.00353347	0.0897158	0.00121969	0.0197264	0	0.00385756	0	0.0510193	0.00436893	0.0154615	0.011108
k__Bacteria;p__Firmicutes;c__Clostridia;o__Clostridiales;f__Ruminococcaceae;g__Butyricicoccus	0.00347625	0.00421519	0	0	0.000745395	0.00670967	0.00170385	0.0128578	0.00308966	0	0.000752293	0.00213335	0.00915147	0.00378438	0.0124035	0.0594984	0.000789008	0.0497331	0.0437762	0.0155508	0.0310173	0	0.0120538	0	0.0247417	0.0313535	0.00810924	0.0152886	0	0	0.00599909	0.00598164	0.00942714	0.0594467	0.0300097	0.0429773	0.0479966	0.0211904	0	0.0281755	0	0.00410698	0	0	0.000206119	0.000661157	0.000450763	0.0174324	0.00135309
k__Bacteria;p__Firmicutes;c__Clostridia;o__Clostridiales;f__Ruminococcaceae;g__Clostridium	0.0228108	0.0111468	0.0115636	0.00126313	0.00415291	0.00674208	0.00826681	0.000277258	0.0120552	0.00690535	0.00804375	0.00362331	0.00319074	0.00843025	0.00889305	0.00338091	0.00818936	0.000504152	0.00294136	0.00696056	0.00708004	0.0101295	0.000924477	0.00471497	0.00714351	0.00313884	0.0167551	0	0.000116518	0.00443537	0.000356703	0.00577538	0.000911291	0.0137078	0.0128696	0.00113891	0.00237836	0.0114744	0.0534826	0.0134009	0.0064852	0.00656469	0.00137092	0.000460604	0.00244398	0.0107254	0.0026699	0.00791763	0
k__Bacteria;p__Firmicutes;c__Clostridia;o__Clostridiales;f__Ruminococcaceae;g__Papillibacter	0.0125145	0.00437131	0.00544171	0.000258368	0	0	0.00160919	0.00450544	0.00513103	0.000404367	0.00219901	0.00223494	0.00045582	0.00184604	0.00119939	0.000665096	0	0	0	0.000939123	0.000955244	0	0.00248898	0.00102808	0.00177821	0.0050919	0.00113291	0	0	0.00198424	0.000453985	0.00357523	0.00163404	0	0.00198894	0.00013399	6.60655e-05	0.00074509	0.00152646	0.00250313	0	0	0	8.63632e-05	0.00288566	0	0	0.00428164	0
k__Bacteria;p__Firmicutes;c__Clostridia;o__Clostridiales;f__Ruminococcaceae;g__Ruminococcus	0.00589306	0.00521435	0	0.00146409	0.00358499	0	0.0324993	0	0.00402759	0.00208405	0	0	0.00718794	0	0.00122864	0.00548704	0	0.00154211	0.000688404	0.0012982	0.0061248	0.0109222	0.0137605	0	0.0146856	0.000662644	0	0.0108896	0	0.0106507	0	0	0.00040851	0	0.0131621	0.00723545	0.0038318	0	0	0.000763149	0.0143388	0	0	0.0018712	0.0023262	0	0	0.0215781	0.00556972
k__Bacteria;p__Firmicutes;c__Clostridia;o__Clostridiales;f__Ruminococcaceae;g__Sporobacter	0.00172157	0	0	0.000516737	0	0.000615863	0.00069416	0	0	0	0	0	0.00129734	0	0.00187222	0.00121934	0	0	0.00190876	0	0.00160144	0	0.00188451	0	0.000766471	0	0	0.000432698	0	0	0	0	0	0	0.000789728	0	0	0	0.00101764	0.00122104	0	0	0.000625857	0	0	0	0	0.000679625	0
k__Bacteria;p__Firmicutes;c__Clostridia;o__Clostridiales;f__Ruminococcaceae;g__Subdoligranulum	0	0.000967933	0	0	0	0	0	0	0	0	0.0020254	0.00101588	0	0	0	0	0	0	0	0	0	0.000557855	0	0	0	0	0.000327947	0	0	0	0.00025942	0	0	0.00108439	0	0	0	0.00113254	0	0	0	0	0	0	0	0	0	0	0
k__Bacteria;p__Firmicutes;c__Erysipelotrichi;o__Erysipelotrichales;f__Erysipelotrichaceae;g__Anaerorhabdus	0	0	0.00430802	0.000287076	0	0	0	0	0.000551724	0.000404367	0	0	0	0.000338441	0.000263281	0	0.00193171	0.000118624	0	0.00088388	0	0.00137996	0	0.00737379	0	0	0	0	0.00116518	0.000379341	0.00119982	0.00099694	0	0	0.0017842	0	0.00561557	0	0	0.000885253	0.00113045	0	0	0	0.000588911	0.00150597	0.00322469	0.000305831	0
k__Bacteria;p__Firmicutes;c__Erysipelotrichi;o__Erysipelotrichales;f__Erysipelotrichaceae;g__Clostridium	0.00705181	0.0118338	0.00439305	0.0346788	0.00741845	0.00800622	0.0171331	0.00582242	0.000358621	0.0065943	0.00309598	0.00700958	0	0.00286136	0.00102387	0.00299293	0.00160522	0.00886714	0.00137681	0.0035079	0.0114067	0	0.0104181	0.0172292	0.0127847	0.0275869	0.00271302	0.0339668	0.00772906	0.00574847	0.00402101	0.00240641	0.00641046	0.00658974	0.00435813	0.0026128	0.00155254	0.00637797	0.00234622	0.0016484	0.00339134	0.0110921	0.0167491	0.0218211	0.00550632	0	0.00724688	0.00288841	0.0029894
k__Bacteria;p__Firmicutes;c__Erysipelotrichi;o__Erysipelotrichales;f__Erysipelotrichaceae;g__Holdemania	0	9.3671e-05	0	0	0.0007099	0	0	0.00100506	0	0	0	0.000338627	0.000280505	0	0	0	0	0	0	0	0	0	0	0	0	0	8.94401e-05	0	0.000466074	0	0	0	0.000282814	0	0	0	0	0	0	0	0	0	0	0	0	0	0	0.000373794	0
k__Bacteria;p__Proteobacteria;c__Gammaproteobacteria;o__Enterobacteriales;f__Enterobacteriaceae;g__Proteus	0	0	0	0	0	0	0	0	0	0	0.00046295	0.00365717	0.000315568	0	0	0	0	0	0	0	0	0	0	0	0	0	0	0	0	0	0	0	0	0	0	0	0	0	0	0	0	0	0	0	0	0	0	0	0
k__Bacteria;p__Proteobacteria;c__Gammaproteobacteria;o__Pseudomonadales;f__Moraxellaceae;g__Psychrobacter	0	0	0	0	0	0	0	0	0	0	0	6.77254e-05	0	0	0	0	0	0	0	0	0	0	0	0	0	0	0	0	0	0	0	0	0	0	0	0	0	0	0	0	0	0	0	0	0	0	0	0	0
k__Bacteria;p__Tenericutes;c__Mollicutes;o__Acholeplasmatales;f__Acholeplasmataceae;g__Acholeplasma	0	0	0	0	0.000816384	0	9.46581e-05	0	0	0	0	0	0	0	0	0.000138562	0.0011427	0.00044484	0	0.000276213	0	0	0	0	0	0	0	0	0	0.000904581	0.000226993	0	0	0	0	0	0	0	0	0	0	0	0	0	0	0	0	0	0
k__Bacteria;p__Verrucomicrobia;c__Verrucomicrobiae;o__Verrucomicrobiales;f__Verrucomicrobiaceae;g__Akkermansia	0.0684324	0.0736566	0.00666043	0.0190044	0.0912576	0.209556	0.0207301	0.0242947	0.12389	0.219914	0.21831	0.362737	0.0286816	0.0060304	0.0349286	0.0479424	0.000435315	0.0190688	0	0	0.0174473	0.0332658	0.0370502	0.114755	0.0184566	0.0372476	0.0474927	0.011178	0.144871	0.0202218	0.104449	0.256832	0.183578	0	0.0416508	0	0	0	0.0621325	0.0849843	0.123814	0.0426867	0.0899446	0.0476437	0.0861577	0.0639853	0.153779	0.057972	0.0527392
k__Bacteria;p__Verrucomicrobia;c__Verrucomicrobiae;o__Verrucomicrobiales;f__Verrucomicrobiaceae;g__Haloferula	0.000397285	0.00187342	0	0	0.000106485	0.00184759	0.000283974	0.000346572	0.000193103	0	0.00066549	0.0014561	0.000140252	0	0.000731336	0	0	0	0	0	0.000112382	0	0.000711136	0.00102808	0.000398565	0	8.94401e-05	0	0.000155358	5.83601e-05	0.00275634	0.00343773	0.00710178	0	0.000497236	0	0	0	0.000141339	0.000488415	0.00139819	0	0.000536449	0.000489392	0	0	0.000589459	0	0.000346141
[truncated: 31 more columns]

## Sheet: Table S5
Table S5: Spearman correlation between the identified genera and experimental time. Only genera with significant correlation are listed. NS, Normal saline control group; PPA+NS; propionic acid control group; PPA+BF, Bifidobacterium treated group; PPA+FT, fecal microbiota transplantation treated group.
Group →	NS					PPA+NS					PPA+BF					PPA+FT
Taxa ↓	R.__Spearman index___	P	FDR	Adjusted.P.__Bonferroni___	Mean.Abundance	R.__Spearman index___	P	FDR	Adjusted.P.__Bonferroni___	Mean.Abundance	R.__Spearman index___	P	FDR	Adjusted.P.__Bonferroni___	Mean.Abundance	R.__Spearman index___	P	FDR	Adjusted.P.__Bonferroni___	Mean.Abundance
f__Peptococcaceae__g__rc44	0.13	0.573666	0.79	1	0.13	0.39	0.0914212	0.49	1	0.05	0.47	0.0383928	0.21	1	0.034	0.3	0.205753	0.43	1	0.14
g__Akkermansia	-0.39	0.0910097	0.31	1	14.67	-0.12	0.612329	0.78	1	10.64	-0.55	0.0118299	0.08	0.57	12.19	-0.65	0.0020842	0.026	0.098	6.96
g__Bacteroides	-0.4	0.0778615	0.3	1	13.87	-0.54	0.0133791	0.31	0.62	14.69	-0.55	0.0118683	0.08	0.57	13.12	-0.4	0.0843086	0.33	1	16.85
g__Bifidobacterium	-0.14	0.545883	0.78	1	1.02	-0.45	0.0463125	0.41	1	1.53	-0.074	0.757457	0.82	1	2.12	-0.15	0.533718	0.76	1	2.2
g__Butyricicoccus	0.6	0.00534534	0.063	0.24	2.32	0.31	0.179651	0.49	1	3.69	0.16	0.504536	0.7	1	1.23	0.73	0.000279391	0.014	0.014	1.99
g__Clostridium	-0.11	0.656153	0.82	1	0.61	0.11	0.651078	0.78	1	0.78	0.18	0.446881	0.68	1	0.59	0.54	0.0147714	0.11	0.65	1.33
g__Clostridium	-0.29	0.2144	0.5	1	0.02	0.02	0.932018	0.98	1	0.024	-0.22	0.362337	0.6	1	0.087	0.44	0.0500019	0.28	1	0.032
g__Clostridium	0.57	0.00812691	0.076	0.35	0.062	0.41	0.074353	0.49	1	0.27	0.29	0.220114	0.4	1	0.21	0.36	0.123057	0.38	1	0.27
g__Clostridium	0.78	4.36613e-05	0.0021	0.0021	9.81	0.25	0.2914	0.57	1	9.3	0.7	0.000616957	0.033	0.033	9.99	0.32	0.171684	0.41	1	13.94
g__Clostridium	-0.45	0.0483857	0.25	1	0.0065	-0.32	0.162933	0.49	1	0.057	-0.45	0.0469768	0.22	1	0.046	-0.31	0.190748	0.41	1	0.0085
g__Clostridium	-0.16	0.51344	0.78	1	0.77	0.14	0.546036	0.77	1	0.77	0.51	0.0207632	0.12	0.96	0.57	0.25	0.284759	0.52	1	0.45
g__Clostridium	-0.54	0.0141473	0.095	0.58	1.42	-0.48	0.0333887	0.41	1	1.62	-0.17	0.482112	0.7	1	1.37	0.18	0.441673	0.69	1	0.63
g__Defluviitalea	0.16	0.507557	0.78	1	0.29	0.13	0.576018	0.77	1	0.57	0.65	0.00191782	0.035	0.1	0.37	0.61	0.00427735	0.036	0.19	0.9
g__Dorea	0.19	0.425759	0.7	1	1.05	0.2	0.402446	0.65	1	0.73	0.67	0.00127702	0.034	0.068	1.06	0.7	0.000573114	0.014	0.028	1.48
g__Lachnospira	0.11	0.637906	0.82	1	0.1	-0.1	0.666885	0.78	1	0.006	-0.096	0.688417	0.78	1	0.11	0.47	0.0368932	0.23	1	0.056
g__Lactonifactor	0.51	0.022468	0.13	0.9	1.83	0.61	0.00419153	0.2	0.2	3.1	0.58	0.00787275	0.08	0.39	0.78	0.63	0.00264809	0.026	0.12	0.99
g__Marvinbryantia	-0.54	0.012965	0.095	0.54	1.17	0.27	0.24751	0.53	1	1.13	0.62	0.00344243	0.046	0.18	0.82	0.19	0.430432	0.69	1	0.29
g__Mucispirillum	-0.69	0.000790477	0.019	0.036	0.12	-0.47	0.0383928	0.41	1	0.071	-0.4	0.0802119	0.29	1	0.055	-0.15	0.528543	0.76	1	0.046
g__Paraeggerthella	0	1	1	1	0.62	0.44	0.0522984	0.41	1	0.48	-0.24	0.307038	0.53	1	0.52	0.66	0.00166909	0.026	0.08	0.39
g__Pediococcus	0.31	0.186773	0.46	1	0.002	-0.13	0.573341	0.77	1	0.01	0.45	0.0483857	0.22	1	0.008	-0.16	0.490293	0.74	1	0.0025
g__Pediococcus	0.63	0.00312028	0.049	0.14	0.1	-0.15	0.531007	0.77	1	0.13	0.44	0.0546355	0.23	1	0.19	0.11	0.646073	0.76	1	0.087
g__Roseburia	-0.086	0.718289	0.83	1	0.31	0.32	0.165367	0.49	1	0.92	0.56	0.0103385	0.08	0.51	0.42	0.42	0.0662136	0.33	1	0.98

## Sheet: Table S6
Table S6: Relative abundance of the KEGG Orthology annotations in all samples. NS, Normal saline control group; PPA+NS; propionic acid control group; PPA+BF, Bifidobacterium treated group; PPA+FT, fecal microbiota transplantation treated group.
KEGG Ortholog ↓	ID →	S1	S2	S3	S4	S5	S6	S7	S8	S9	S10	S11	S12	S13	S14	S15	S16	S17	S18	S19	S20	S21	S22	S23	S24	S25	S26	S27	S28	S29	S30	S31	S32	S33	S34	S35	S36	S37	S38	S39	S40	S41	S42	S43	S44	S45	S46	S47	S48
	Group →	NS	NS	NS	NS	NS	NS	NS	NS	NS	NS	NS	NS	NS	NS	NS	NS	NS	NS	NS	NS	PPA+NS	PPA+NS	PPA+NS	PPA+NS	PPA+NS	PPA+NS	PPA+NS	PPA+NS	PPA+NS	PPA+NS	PPA+NS	PPA+NS	PPA+NS	PPA+NS	PPA+NS	PPA+NS	PPA+NS	PPA+NS	PPA+NS	PPA+NS	PPA+BF	PPA+BF	PPA+BF	PPA+BF	PPA+BF	PPA+BF	PPA+BF	PPA+BF
	Time →	0	0	0	0	0	4	4	4	4	4	18	18	18	18	18	33	33	33	33	33	0	0	0	0	0	4	4	4	4	4	18	18	18	18	18	33	33	33	33	33	0	0	0	0	0	4	4	4
	Function ↓
K00001	alcohol dehydrogenase [EC:1.1.1.1]	0.00032056	0.000156121	0.000353273	0.000489675	0.000618848	0.00043901	0.000396774	0.000270069	0.000346128	0.000398645	0.000544909	0.000316937	0.000397255	0.000324951	0.000395162	0.000358132	0.000132082	0.000897904	0.000242004	0.000202857	0.000440237	0.000474361	0.000342604	0.000356922	0.000483268	0.000378958	0.000350946	0.000330321	0.000504383	0.000366031	0.000324368	0.000353977	0.000475326	0.000243048	0.000695738	0.000410228	0.000277732	0.000295692	0.000138495	0.000307772	0.000287703	0.000617805	0.000558242	0.000391661	0.000287593	0.000387325	0.000424921	0.000287448
K00002	alcohol dehydrogenase (NADP+) [EC:1.1.1.2]	0	0	0	0	0	0	0	0	0	0	0	0	0	0	0	0	0	2.85477e-07	0	0	0	0	0	0	0	0	0	0	4.63236e-06	0	0	0	0	0	0	0	0	0	0	0	0	0	0	6.54711e-06	0	0	0	0
K00003	homoserine dehydrogenase [EC:1.1.1.3]	0.000553611	0.000747774	0.000440042	0.000348555	0.000401521	0.000627667	0.00050241	0.000699521	0.000550633	0.000582028	0.00038554	0.000915912	0.000511533	0.000542538	0.000507321	0.000660585	0.000729017	0.000869179	0.000523948	0.000682518	0.000405998	0.000382896	0.000564157	0.000468651	0.000518513	0.00067864	0.000557721	0.000599645	0.000471274	0.000521831	0.000643498	0.000677115	0.000549506	0.000818454	0.000626742	0.000713302	0.000633774	0.000658063	0.000724414	0.00061402	0.000448023	0.000370091	0.000375986	0.000561886	0.000654786	0.000527684	0.000548016	0.000782384
K00004	(R,R)-butanediol dehydrogenase / meso-butanediol dehydrogenase / diacetyl reductase [EC:1.1.1.4 1.1.1.- 1.1.1.303]	1.54673e-06	9.85638e-06	8.48205e-06	5.56319e-06	2.30671e-05	1.54235e-05	2.73025e-05	1.21285e-05	1.65293e-06	5.74544e-06	1.30878e-05	5.83746e-05	0.000117425	3.30748e-05	1.84292e-05	1.33371e-05	4.08199e-05	3.0771e-06	8.21493e-05	6.34825e-05	9.49515e-06	1.87667e-05	1.12312e-05	1.83908e-05	2.97639e-06	4.67415e-06	1.05167e-05	1.08304e-05	1.75e-05	7.50737e-06	1.43728e-05	5.99932e-05	6.1157e-06	2.03238e-05	6.17345e-06	2.62099e-05	6.399e-05	1.87001e-05	5.61161e-06	1.77171e-05	8.30286e-06	1.73834e-05	2.13962e-05	6.24804e-05	8.88338e-05	2.42779e-06	2.63048e-05	5.44634e-06
K00005	glycerol dehydrogenase [EC:1.1.1.6]	0.000159541	0.000358978	0.000221256	0.000147503	0.000154945	0.000172472	0.000204027	0.000351254	0.000125749	0.000183035	8.50739e-05	0.000381974	0.000200781	0.000294297	0.000251943	0.00024845	0.000270421	0.000197909	0.000265445	0.000314375	0.000134859	0.000176519	0.000147902	0.000296146	0.000206715	0.000259559	0.000323353	0.000209089	0.000241166	0.000201531	0.000400034	0.000303899	0.000224862	0.000325273	0.000197543	0.000286871	0.000202842	0.000246011	0.000298618	0.000240571	0.000112882	0.000134164	0.000126995	0.000222995	0.000172538	0.000230763	0.000293146	0.00037386
K00007	D-arabinitol 4-dehydrogenase [EC:1.1.1.11]	8.32855e-07	0	0	0	2.4146e-06	1.7486e-06	9.21568e-08	8.88395e-07	4.77515e-07	3.14204e-07	0	0	4.16609e-06	4.05826e-07	0	5.78552e-07	0	0	0	0	3.29655e-07	0	2.15985e-06	1.67897e-07	9.92128e-07	0	0	0	7.20589e-07	6.91273e-08	1.05125e-06	0	0	0	4.70358e-07	5.71333e-07	0	3.32743e-07	0	1.33412e-07	0	3.1131e-06	0	4.5264e-08	0	0	3.40988e-06	1.04737e-06
K00008	L-iditol 2-dehydrogenase [EC:1.1.1.14]	0.000565945	0.00070173	0.000743521	0.000327116	0.000381575	0.000539061	0.000364713	0.000736187	0.000663369	0.000568302	0.000577096	0.000649395	0.000491642	0.000392704	0.000621625	0.000445658	0.000410817	0.000322529	0.000291148	0.00065204	0.000518528	0.000348739	0.000459296	0.000437332	0.000433262	0.000646285	0.000361219	0.000407822	0.000398726	0.000488326	0.000563642	0.000524143	0.000515535	0.000702858	0.000389887	0.000509861	0.000440466	0.000650027	0.000751488	0.00038639	0.000478097	0.000311432	0.000246833	0.000551763	0.000576558	0.000317541	0.000425991	0.000741128
K00009	mannitol-1-phosphate 5-dehydrogenase [EC:1.1.1.17]	1.41585e-05	2.38759e-05	3.62295e-05	0.000134672	4.19216e-05	3.6855e-05	0.00013465	2.92784e-05	3.91782e-05	6.14403e-05	3.79313e-05	0.000100085	9.67512e-05	0.00022361	0.000105716	0.000175411	0.000126143	0.000408271	0.000279744	8.09231e-05	0.000105913	0.000136554	8.91778e-05	0.000102723	0.000155284	6.77828e-05	0.000112323	8.12063e-05	6.6603e-05	4.85697e-05	0.000109623	0.000135789	0.000168919	4.90301e-05	0.000277776	0.000123901	0.000108609	3.77996e-05	1.41537e-05	0.000128173	0.000239115	7.58704e-05	0.000229148	5.74739e-05	2.35723e-05	0.000149904	8.6487e-05	2.21624e-05
K00010	myo-inositol 2-dehydrogenase / D-chiro-inositol 1-dehydrogenase [EC:1.1.1.18 1.1.1.369]	0.000128934	4.10741e-05	0.000214862	0.000129344	0.00014652	9.65987e-05	0.000130991	0.000108519	5.05126e-05	5.49767e-05	0.000308102	7.6784e-05	0.000248563	7.57711e-05	0.00022657	0.000126341	6.77478e-05	6.95972e-05	0.000142089	0.000136651	0.000272742	0.000223472	0.000116584	0.000139089	0.00013613	0.000130991	4.53918e-05	0.000129702	0.000215353	0.000120331	0.000109961	8.96358e-05	6.53468e-05	0.000102199	0.000124086	0.000117937	0.000166494	0.000135216	4.62281e-05	8.03672e-05	0.000122894	0.000173042	0.000192358	0.00024882	0.000153749	3.37906e-05	8.30696e-05	6.20464e-05
K00012	UDPglucose 6-dehydrogenase [EC:1.1.1.22]	0.000764848	0.000570107	0.000869347	0.000661186	0.00068123	0.000655824	0.00061104	0.000690869	0.000436993	0.000632839	0.00104224	0.000597404	0.000745	0.000538539	0.000752774	0.000535283	0.00058724	0.00109657	0.00032543	0.000585615	0.000840948	0.000754952	0.000734125	0.000776139	0.0005164	0.00061511	0.000518536	0.000639591	0.000751082	0.000645577	0.000732856	0.000624474	0.00058843	0.000573692	0.000806676	0.000554328	0.000612458	0.000671309	0.000473635	0.000503101	0.000633747	0.000671436	0.000746566	0.000840234	0.00100286	0.000444612	0.00062727	0.000642204
K00013	histidinol dehydrogenase [EC:1.1.1.23]	0.000683893	0.000592207	0.000623795	0.00054346	0.00054126	0.000642519	0.000544704	0.000603632	0.000631526	0.000650601	0.000712122	0.000679244	0.000645111	0.000415168	0.000530962	0.000508415	0.000412391	0.000274961	0.000330243	0.000560134	0.000615179	0.000533047	0.000613173	0.000491017	0.00043479	0.000590626	0.000356891	0.000540385	0.000497203	0.000554763	0.000696933	0.000568813	0.000416452	0.000638235	0.000393268	0.000522832	0.000562231	0.000685855	0.000696434	0.000506063	0.000596469	0.000463376	0.000491308	0.000724973	0.000776362	0.000420885	0.000427718	0.000617119
K00014	shikimate dehydrogenase [EC:1.1.1.25]	0.000939649	0.0011383	0.000981816	0.000656136	0.000692558	0.000820999	0.000658956	0.00107635	0.000727167	0.000801971	0.000781466	0.000977422	0.000812905	0.000737174	0.000739088	0.000671228	0.000643113	0.000516086	0.00049316	0.000852628	0.000793604	0.000606277	0.000835326	0.000896788	0.000601051	0.000867445	0.000767125	0.000758067	0.000711809	0.000760712	0.000926033	0.000770481	0.000596246	0.000951778	0.000584108	0.000734494	0.000762189	0.000954528	0.000949151	0.00068439	0.000728965	0.000586872	0.000559549	0.000910509	0.000988309	0.000595603	0.00075531	0.00100053
K00015	glyoxylate reductase [EC:1.1.1.26]	0	0	6.01633e-06	0	0	2.24179e-06	0	2.43343e-06	3.74665e-06	0	3.77833e-06	0	3.74761e-06	3.04369e-07	1.01778e-05	0	2.17013e-06	0	0	1.90105e-05	0	3.24185e-06	8.6394e-07	0	2.40031e-06	8.81191e-07	4.19224e-06	6.57718e-07	5.55883e-06	0	0	9.20638e-06	3.4443e-05	2.66239e-06	1.76384e-06	2.67812e-06	0	1.53062e-06	6.11042e-06	0	6.44514e-07	4.52948e-06	0	4.5264e-06	2.01525e-05	0	6.95261e-06	1.49984e-05
K00016	L-lactate dehydrogenase [EC:1.1.1.27]	0.000706945	0.00066379	0.000616	0.00146324	0.00123389	0.00113667	0.00175246	0.000733921	0.0010872	0.00111176	0.000444402	0.000886018	0.00102186	0.00189323	0.00137699	0.00182585	0.00195663	0.00144875	0.00251098	0.00127566	0.000767628	0.00153864	0.000935023	0.000947141	0.00193481	0.00121046	0.00170307	0.00154711	0.00126801	0.00125929	0.000895562	0.00120931	0.00170818	0.00118081	0.00169148	0.00176136	0.00133914	0.000954642	0.00112851	0.00181806	0.00120446	0.0015396	0.00158078	0.00066581	0.000570804	0.00205317	0.00164389	0.000921196
K00018	glycerate dehydrogenase [EC:1.1.1.29]	0.000611623	0.000701585	0.000671569	0.000489297	0.000457926	0.000483666	0.000426828	0.000628655	0.000516646	0.000496734	0.000563685	0.000383969	0.00046773	0.000379478	0.000507597	0.000309053	0.000341225	0.000183365	0.000178421	0.000519416	0.000552713	0.000472878	0.00051456	0.000507325	0.00038861	0.000498563	0.000383237	0.000432143	0.000453804	0.000472355	0.000543246	0.000333811	0.000382566	0.000537559	0.00032257	0.000415234	0.000409664	0.000609349	0.000595935	0.000340793	0.000499666	0.000412468	0.000394608	0.000616934	0.000666284	0.000344806	0.000423253	0.000548614
K00019	3-hydroxybutyrate dehydrogenase [EC:1.1.1.30]	8.32855e-07	0	5.26018e-07	0	2.4146e-06	5.55964e-06	1.19459e-06	2.62656e-06	5.75221e-06	5.38635e-06	3.10835e-06	2.71807e-06	5.51139e-06	7.10195e-07	0	5.78552e-07	1.98674e-07	7.24971e-07	0	5.42342e-07	3.29655e-07	5.04288e-07	3.74374e-06	1.67897e-07	9.92128e-07	8.42879e-08	6.8666e-07	1.18389e-06	2.36765e-06	6.91273e-08	2.41263e-05	1.51956e-05	2.29433e-06	0	1.23469e-06	5.71333e-07	4.55298e-07	1.39752e-06	0	1.33412e-07	6.44514e-07	3.1131e-06	0	4.5264e-08	0	0	5.93408e-06	8.37898e-06
K00020	3-hydroxyisobutyrate dehydrogenase [EC:1.1.1.31]	7.00986e-05	0.000107447	8.03602e-05	7.4982e-05	0.000102766	0.000158853	9.07848e-05	7.43324e-05	0.000109394	0.000155922	0.000133442	0.000345911	7.92465e-05	7.1335e-05	8.24045e-05	0.00012053	0.0001998	0.000128731	8.20261e-05	0.000153285	7.14931e-05	7.75224e-05	0.000128095	0.000122023	8.32482e-05	0.000131853	0.000157173	0.000179484	0.00018116	0.000113999	0.000130563	0.000202608	0.000239825	8.72657e-05	0.000104292	0.000104636	9.13493e-05	6.6679e-05	0.000111546	0.00012273	9.48698e-05	0.000106761	0.000119894	0.000146352	0.000149529	0.000132172	0.000130867	0.000145152
K00023	acetoacetyl-CoA reductase [EC:1.1.1.36]	0	0	5.26018e-07	0	0	2.24179e-06	0	0	4.40783e-07	3.14204e-07	2.02549e-06	9.12103e-08	4.80463e-07	3.04369e-07	0	0	1.98674e-07	7.24971e-07	0	2.85443e-07	0	5.04288e-07	1.58389e-06	1.67897e-07	0	0	6.8666e-07	6.57718e-07	1.28677e-06	0	0	0	0	0	0	0	4.55298e-07	0	0	1.33412e-07	6.44514e-07	0	0	4.5264e-08	0	0	2.5242e-06	0
K00024	malate dehydrogenase [EC:1.1.1.37]	0.000476909	0.000258448	0.000629753	0.000597195	0.000599942	0.000440893	0.000440361	0.000364519	0.000310957	0.000400438	0.000879251	0.000246409	0.000554881	0.000202975	0.000490349	0.000218744	6.75287e-05	6.32819e-05	7.76441e-05	0.00018678	0.000667614	0.000650627	0.000436809	0.000506801	0.000311662	0.000351431	0.000228206	0.000389669	0.000560396	0.000472904	0.000415564	0.000272435	0.000229075	0.000126833	0.000252734	0.000220284	0.000239197	0.000370592	0.000174682	0.000169958	0.000468953	0.000529063	0.000587373	0.000661977	0.000469363	0.000248928	0.000358672	0.000284034
K00027	malate dehydrogenase (oxaloacetate-decarboxylating) [EC:1.1.1.38]	0.000490165	0.000636125	0.000454743	0.000475132	0.000315491	0.000495178	0.000644871	0.000542433	0.000531505	0.000504995	0.000295575	0.000620296	0.000535966	0.000788728	0.000575369	0.000791455	0.000917579	0.000818335	0.000918047	0.000711778	0.000466375	0.000479722	0.000534395	0.000516753	0.000634178	0.000578538	0.000632567	0.000666948	0.000435879	0.00055297	0.000579483	0.000587285	0.000615444	0.000726687	0.00070353	0.000741556	0.000712334	0.000603732	0.000746211	0.000773118	0.000602731	0.000395413	0.000493324	0.000435873	0.000588452	0.000666148	0.000583598	0.00055979
K00029	malate dehydrogenase (oxaloacetate-decarboxylating)(NADP+) [EC:1.1.1.40]	0.000261685	0.000146745	0.000317751	0.00030425	0.000325423	0.00027713	0.00022579	0.000190934	0.000188196	0.000251393	0.000498758	0.000211391	0.00029065	0.000105399	0.000253191	0.000119902	3.42584e-05	3.5153e-05	3.75638e-05	9.12276e-05	0.000338176	0.000338581	0.000232116	0.000281828	0.000160458	0.000184188	0.000123843	0.000199873	0.000318857	0.000249699	0.000225865	0.000196778	0.000155841	6.39039e-05	0.000135505	0.000113999	0.000121275	0.000187725	9.92138e-05	0.000108748	0.000264519	0.000276106	0.000316806	0.000347342	0.000255431	0.000143498	0.000218336	0.00015904
K00030	isocitrate dehydrogenase (NAD+) [EC:1.1.1.41]	2.23582e-05	2.924e-05	2.61694e-05	3.65673e-05	2.23736e-05	3.55884e-05	4.76502e-05	4.64766e-05	2.43073e-05	3.67955e-05	4.14545e-05	9.49271e-05	2.38069e-05	3.45797e-05	3.11514e-05	7.69703e-05	7.08961e-05	0.000117614	9.37555e-05	6.66438e-05	6.64409e-05	6.80789e-06	6.72673e-05	5.01527e-05	4.6534e-05	9.37032e-05	5.58814e-05	8.70161e-05	6.51876e-05	3.7444e-05	9.24789e-05	0.000114764	5.22461e-05	9.42908e-05	3.65336e-05	6.76583e-05	0.000129574	4.8256e-05	1.37874e-05	7.98069e-05	1.30135e-05	2.95946e-05	3.22268e-05	5.01339e-05	2.83763e-05	2.27665e-05	1.85108e-05	4.8022e-05
K00031	isocitrate dehydrogenase [EC:1.1.1.42]	0.00055606	0.000468264	0.00047249	0.000334498	0.000349967	0.000507407	0.000382962	0.000450529	0.000504782	0.00052906	0.00058697	0.000541243	0.000352111	0.000287612	0.000444788	0.000369167	0.000346095	0.000205742	0.000173696	0.000432791	0.000448107	0.000396313	0.000445101	0.000338477	0.000344378	0.000420403	0.000236627	0.000366725	0.0003637	0.000407668	0.000525852	0.000408852	0.000363183	0.000506902	0.000323516	0.000377981	0.000344309	0.000531479	0.000628542	0.000388171	0.000485168	0.000317363	0.000356483	0.000445968	0.00051608	0.000326142	0.000298696	0.000465292
K00033	6-phosphogluconate dehydrogenase [EC:1.1.1.44 1.1.1.343]	0.000313788	0.000149927	0.000378018	0.000633798	0.000591051	0.000394196	0.000548731	0.000289066	0.000338369	0.000360756	0.000466557	0.000211635	0.000485133	0.00049701	0.00052491	0.00052897	0.000338235	0.000569231	0.000638127	0.000356026	0.000505244	0.000633268	0.000398108	0.000395948	0.000641499	0.000413564	0.000463631	0.000475322	0.000513433	0.00042943	0.000399498	0.000369793	0.000550287	0.00027358	0.000662271	0.000503124	0.000402111	0.00032232	0.000179112	0.000439067	0.00048076	0.000675465	0.000663424	0.000402197	0.000267875	0.000553787	0.0004697	0.000306252
K00034	glucose 1-dehydrogenase [EC:1.1.1.47]	0	4.62574e-07	1.09806e-05	7.27495e-07	3.85309e-07	2.69015e-07	1.25316e-06	5.48487e-06	7.44188e-06	5.64669e-06	4.58852e-06	2.58125e-06	6.77452e-06	3.65243e-06	2.36331e-05	7.2045e-06	5.76155e-06	1.73349e-05	0	3.84492e-05	1.06988e-06	5.90737e-06	0	0	1.76343e-05	2.80449e-06	7.5894e-06	0	6.8456e-06	0	2.29909e-05	3.36084e-05	7.86843e-05	7.22272e-06	3.39833e-05	1.22051e-05	0	3.06123e-06	1.22208e-05	2.52593e-06	0	9.05896e-06	4.65793e-06	5.1124e-06	4.0305e-05	0	1.09382e-05	2.99968e-05
K00036	glucose-6-phosphate 1-dehydrogenase [EC:1.1.1.49 1.1.1.363]	0.000310695	0.000144483	0.00037792	0.000628277	0.000586427	0.000388368	0.000543563	0.000278831	0.000335577	0.000351518	0.000458922	0.000185823	0.000482923	0.000488352	0.000519964	0.000516163	0.000334735	0.000550172	0.000632355	0.000351744	0.000500296	0.000632836	0.000389757	0.000394087	0.000622169	0.000404944	0.000456728	0.000461773	0.000510808	0.00042943	0.000349963	0.000335092	0.000535955	0.000264433	0.000627318	0.000491741	0.000401407	0.000318526	0.000179112	0.000428714	0.00048004	0.000669671	0.000658766	0.000401025	0.000260425	0.000547979	0.00046629	0.000303822
K00038	3alpha(or 20beta)-hydroxysteroid dehydrogenase [EC:1.1.1.53]	0	1.4233e-07	0	0	0	0	0	0	0	3.14204e-07	0	0	0	0	0	0	0	0	0	6.85063e-07	0	0	0	0	0	0	0	0	0	0	0	0	0	0	0	0	0	0	0	0	0	0	0	0	0	0	0	0
K00039	ribitol 2-dehydrogenase [EC:1.1.1.56]	8.32855e-07	0	0	0	2.4146e-06	1.7486e-06	9.21568e-08	8.88395e-07	4.77515e-07	3.14204e-07	0	0	4.16609e-06	4.05826e-07	0	5.78552e-07	0	0	0	0	3.29655e-07	0	2.15985e-06	1.67897e-07	9.92128e-07	0	0	0	7.20589e-07	6.91273e-08	1.05125e-06	0	0	0	4.70358e-07	5.71333e-07	0	3.32743e-07	0	1.33412e-07	0	3.1131e-06	0	4.5264e-08	0	0	3.40988e-06	1.04737e-06
K00040	fructuronate reductase [EC:1.1.1.57]	0.00017486	0.000128625	0.000192046	9.10866e-05	8.57954e-05	0.00013388	5.58384e-05	0.000233957	7.31394e-05	0.000130125	5.09034e-05	0.000233666	0.000134804	0.000166997	0.000156002	0.000172302	5.22666e-05	0.000146536	0.000111116	0.000223311	0.000106063	3.07255e-05	0.000120136	9.44965e-05	0.00012632	0.000199322	8.62842e-05	0.000108151	9.16178e-05	9.10496e-05	0.000187123	0.000110274	0.000135921	0.000291874	0.000153351	0.000205126	0.000134416	0.000229116	0.000178849	0.000141772	7.61285e-05	5.67732e-05	1.79122e-05	0.000132326	0.000181372	6.90888e-05	7.98811e-05	0.000287986
K00041	tagaturonate reductase [EC:1.1.1.58]	0.000384372	0.000228212	0.00049777	0.000374061	0.000346495	0.000282443	0.000271589	0.000382898	0.000339537	0.00026741	0.000426925	0.000116198	0.000355552	0.000269037	0.00036691	0.000200986	8.69887e-05	0.00010873	0.000100619	0.000241194	0.000397287	0.00033373	0.000297279	0.000315234	0.000245904	0.000328704	0.000172921	0.000273413	0.000327958	0.000362123	0.000301731	0.000150451	0.000153809	0.000302227	0.000236112	0.000237371	0.000193481	0.000376579	0.000245651	0.000177518	0.00028261	0.000295285	0.000278065	0.000435074	0.0003699	0.000175091	0.000211804	0.000363061
K00042	2-hydroxy-3-oxopropionate reductase [EC:1.1.1.60]	2.04248e-05	8.59971e-05	6.61961e-05	3.87425e-05	5.65633e-05	4.09351e-05	6.1932e-05	4.86976e-05	5.1137e-05	3.79401e-05	2.79608e-05	0.000325298	8.10401e-05	5.07171e-05	5.24845e-05	6.79342e-05	7.21596e-05	3.97204e-05	3.40001e-05	0.00016476	2.53102e-05	3.88662e-05	3.79654e-05	5.11644e-05	3.18121e-05	8.93451e-05	7.16836e-05	6.78327e-05	8.58016e-05	3.0836e-05	0.000117825	5.05845e-05	0.000123709	7.17659e-05	3.21313e-05	8.78067e-05	4.09631e-05	6.37675e-05	8.05057e-05	3.82297e-05	2.21474e-05	4.59187e-05	5.40396e-05	0.000113488	6.81317e-05	4.3954e-05	4.28963e-05	0.00010545
K00045	mannitol 2-dehydrogenase [EC:1.1.1.67]	0.000119297	2.30575e-05	0.00019032	0.000114987	0.000117545	6.56396e-05	9.38363e-05	7.46638e-05	2.29942e-05	4.84772e-05	0.000289801	1.33623e-05	0.000109017	3.65243e-05	0.000195965	4.26302e-05	1.81558e-05	1.75604e-05	1.43251e-05	5.87156e-05	0.000219525	0.000202291	8.33222e-05	0.000124668	0.000105486	8.74678e-05	2.53341e-05	9.87454e-05	0.000145816	0.000110009	8.59506e-05	2.10937e-05	4.61491e-05	3.01035e-05	8.55463e-05	4.80634e-05	4.61506e-05	8.87092e-05	2.17606e-05	2.91015e-05	0.000113548	0.000145474	0.000167231	0.000139268	6.36737e-05	2.65153e-05	4.64984e-05	1.75959e-05
K00046	gluconate 5-dehydrogenase [EC:1.1.1.69]	0.000549159	0.000445752	0.000518613	0.000419914	0.000373261	0.000446183	0.000331894	0.000489013	0.000474295	0.000446877	0.000535548	0.00023318	0.000436909	0.000311818	0.000464174	0.000294833	0.000210167	0.000196197	0.000180656	0.000428257	0.000534269	0.0004142	0.000469251	0.000360307	0.000371104	0.000460691	0.000261608	0.000411775	0.000326157	0.000446977	0.000476702	0.000297601	0.000351844	0.000534343	0.00030649	0.000388649	0.000382926	0.000586742	0.000502262	0.000277176	0.0004023	0.000339425	0.00029984	0.000537601	0.000450489	0.000214205	0.000284415	0.00050917
K00048	lactaldehyde reductase [EC:1.1.1.77]	0.000316098	0.00032763	0.000399281	0.000242869	0.000247432	0.000266773	0.000265818	0.000343654	0.000259924	0.000240063	0.000367601	0.000308777	0.000281922	0.000262254	0.000412041	0.000209938	8.9215e-05	0.000506118	9.79703e-05	0.000301523	0.000341124	0.000244949	0.000244315	0.000212343	0.000323026	0.000377447	0.000153396	0.000269478	0.000252464	0.000296419	0.00030048	0.000140928	0.000239056	0.00040005	0.000436147	0.000338041	0.000141191	0.00041561	0.000368662	0.000212706	0.000209777	0.000253857	0.000237668	0.000324935	0.000237799	0.000195834	0.000164501	0.000345906
K00050		3.82717e-06	0	4.15883e-06	2.35366e-07	4.6237e-06	7.8911e-06	3.18673e-06	8.88395e-07	3.32424e-06	2.24431e-07	2.02549e-06	4.56051e-07	4.4683e-06	1.10926e-05	0	1.76611e-06	0	0	0	0	0	3.13379e-06	3.02379e-06	8.71938e-06	9.92128e-07	5.86184e-06	1.30646e-05	1.40313e-06	1.64706e-06	2.19275e-06	1.05125e-06	0	0	4.58669e-06	4.70358e-07	4.85633e-06	0	2.09628e-06	0	2.49035e-06	1.06155e-06	3.22368e-06	1.89347e-07	0	3.44017e-06	1.90415e-07	9.67609e-06	8.33709e-06
K00052	3-isopropylmalate dehydrogenase [EC:1.1.1.85]	0.000719706	0.00077382	0.000706478	0.000548082	0.000564481	0.000648482	0.000547848	0.000706648	0.000639864	0.000649568	0.000707915	0.000664012	0.000645544	0.000471781	0.000545912	0.000510334	0.000420705	0.000275799	0.000331827	0.000567727	0.000647844	0.000536217	0.0006305	0.000643461	0.000441287	0.00061438	0.000477743	0.00054341	0.000533644	0.000571785	0.000657868	0.000548175	0.000421517	0.000648384	0.000393533	0.000521868	0.000562313	0.000690281	0.000715077	0.00050737	0.00060299	0.000471986	0.000491308	0.000731606	0.00078593	0.000429835	0.000537631	0.000650133
K00053	ketol-acid reductoisomerase [EC:1.1.1.86]	0.000700272	0.000761509	0.000699245	0.00052232	0.000547785	0.000639874	0.000519512	0.000700583	0.000630167	0.000644182	0.000709123	0.000684853	0.000643382	0.000468129	0.000545394	0.000503026	0.000417037	0.000273736	0.000331827	0.000567727	0.000644668	0.000524006	0.000609237	0.000629229	0.00043383	0.000614227	0.000474888	0.00054341	0.000526078	0.000564241	0.000707025	0.000579234	0.000425306	0.000638763	0.000393533	0.000521511	0.000562231	0.000684058	0.000714267	0.000507237	0.00059719	0.000463376	0.00045128	0.000727034	0.000623122	0.000429835	0.000536967	0.000646236
K00054	hydroxymethylglutaryl-CoA reductase [EC:1.1.1.88]	7.4719e-05	7.86375e-06	5.08594e-05	0.000322922	0.000300541	0.000187952	0.000302076	6.39644e-05	0.000191579	0.000198882	6.03675e-05	0.000130184	0.000175945	0.000381037	0.000252777	0.000340176	0.000290461	0.000467719	0.000530099	0.000191632	0.000124039	0.000308282	0.000142262	0.000140592	0.000434008	0.000188391	0.000325585	0.000231363	0.000236868	0.000196901	0.000150664	0.000246961	0.000405265	0.000138629	0.000460693	0.000321903	0.000208733	0.000101919	9.37762e-05	0.000328299	0.000268687	0.000373254	0.000380265	6.35312e-05	1.38421e-05	0.000430386	0.000301797	0.000115337
K00055	aryl-alcohol dehydrogenase [EC:1.1.1.90]	0	1.06748e-07	1.80819e-06	1.33945e-05	0	3.45236e-06	1.20639e-05	0	3.30587e-06	1.61591e-06	2.72663e-07	4.56051e-06	5.12702e-06	2.88813e-05	1.8688e-05	3.35865e-05	1.80029e-05	2.73878e-05	4.65654e-05	1.58564e-05	3.63958e-06	1.17967e-05	2.35184e-06	6.44758e-06	4.08693e-05	4.44427e-06	2.07082e-05	1.77584e-05	9.88237e-06	7.65083e-06	3.23787e-06	3.03507e-06	2.72768e-05	7.67085e-06	5.07986e-05	3.41371e-05	9.10595e-06	1.86336e-06	3.11756e-06	2.8141e-05	4.5116e-06	1.08255e-05	1.81962e-05	1.45491e-06	0	3.14185e-05	1.5898e-05	1.00548e-06
K00057	glycerol-3-phosphate dehydrogenase (NAD(P)+) [EC:1.1.1.94]	0.000809247	0.000787582	0.000763321	0.000878878	0.000866204	0.00085503	0.000866263	0.000776676	0.000842321	0.000860906	0.000791983	0.000826947	0.000835831	0.000858347	0.000806523	0.000864144	0.000873437	0.000853826	0.000918795	0.000813365	0.000807732	0.000847705	0.000844877	0.000796801	0.000876319	0.00081873	0.000849018	0.000862097	0.000821082	0.00084389	0.000807746	0.000849886	0.000852458	0.000802855	0.000863156	0.000852439	0.000864486	0.000800036	0.000817248	0.000877668	0.00087343	0.00087667	0.000873732	0.000803316	0.000825665	0.000897697	0.000841288	0.000792041
K00058	D-3-phosphoglycerate dehydrogenase / 2-oxoglutarate reductase [EC:1.1.1.95 1.1.1.399]	0.00127507	0.00239417	0.00171877	0.000723579	0.000872754	0.000956134	0.000864774	0.00180131	0.000950448	0.000911908	0.00091744	0.00101906	0.000967868	0.00129214	0.000981342	0.00088989	0.000920034	0.00057936	0.000749674	0.00108721	0.00112948	0.000761994	0.00101193	0.00203912	0.000772337	0.00111598	0.00166123	0.000827742	0.00105496	0.00093086	0.0010883	0.00103769	0.00089958	0.00108916	0.000655603	0.00087531	0.000961692	0.00101081	0.00119532	0.000803055	0.00087707	0.000694914	0.000580793	0.00102323	0.0010932	0.000769396	0.00167252	0.00133969
K00059	3-oxoacyl-[acyl-carrier protein] reductase [EC:1.1.1.100]	0.00230159	0.00214808	0.00176903	0.00141789	0.0015806	0.00210475	0.00145811	0.00215433	0.00211342	0.00227129	0.00201965	0.00223716	0.00174292	0.00163914	0.00181545	0.00180028	0.00217905	0.00203572	0.00149007	0.00214565	0.0018293	0.00167486	0.00214989	0.00161771	0.00174339	0.00198552	0.00168245	0.0020119	0.00149914	0.00169351	0.00241043	0.00217252	0.00199528	0.0023473	0.00182229	0.00195466	0.00222917	0.00217001	0.00194031	0.00183635	0.00211394	0.00149217	0.00134102	0.00186298	0.00196635	0.0015903	0.00182919	0.00229906
K00060	threonine 3-dehydrogenase [EC:1.1.1.103]	3.36315e-05	4.33691e-05	4.64484e-05	1.81946e-05	6.30021e-05	0.000103885	2.69641e-05	2.38001e-05	8.02654e-05	0.000119024	0.000109104	0.00032309	4.63349e-05	1.73264e-05	3.1372e-05	5.59877e-05	4.45284e-05	2.14914e-05	8.41204e-06	6.06566e-05	1.17807e-05	1.63414e-05	2.36302e-05	5.24842e-05	9.81471e-06	2.80066e-05	3.02672e-05	7.99478e-06	8.21817e-05	1.78899e-05	9.3071e-05	0.000140288	0.000129086	2.01261e-05	2.80942e-05	3.83507e-05	5.67053e-06	2.58708e-05	8.64708e-05	5.35159e-05	5.68245e-05	2.55973e-05	3.85889e-05	3.301e-05	6.68423e-05	4.71359e-05	7.93718e-05	5.7047e-05
K00065	2-dehydro-3-deoxy-D-gluconate 5-dehydrogenase [EC:1.1.1.127]	0.000149755	0.000222534	0.000155406	0.000136641	5.81559e-05	0.00010662	0.000130237	0.000144113	0.000134733	0.000171914	0.00011557	0.000116156	0.000119079	0.000244341	0.000173712	0.000154382	0.000232265	4.48193e-05	0.000306811	0.000228811	0.000172976	0.000180283	0.000186035	0.000249931	0.000155188	8.00735e-05	0.000256269	0.000152766	0.000115243	5.29129e-05	0.000176516	0.000216299	0.000329601	0.000110581	8.78687e-05	9.60553e-05	0.000206995	0.000111602	6.22577e-05	0.000144921	0.000349592	7.94324e-05	0.000167837	0.000101005	0.000112935	0.000167661	0.000245334	0.000138421
K00067	dTDP-4-dehydrorhamnose reductase [EC:1.1.1.133]	0.00105563	0.00100712	0.00121608	0.00108079	0.0010994	0.000966054	0.000997705	0.00100233	0.000870074	0.000916621	0.00134168	0.000762613	0.001019	0.000928848	0.00117493	0.000792457	0.000824421	0.000426267	0.000866924	0.000963417	0.00125586	0.0012166	0.000985543	0.00121398	0.00100951	0.000980191	0.000946226	0.00100766	0.00112108	0.00104243	0.000911359	0.000796436	0.000907144	0.000828392	0.000770965	0.000854206	0.000886927	0.000957271	0.000885883	0.000806989	0.0010778	0.00111844	0.00118123	0.00109141	0.000999139	0.000877659	0.00102127	0.000844421
K00068	sorbitol-6-phosphate 2-dehydrogenase [EC:1.1.1.140]	1.66571e-06	1.56563e-06	0	0	4.8292e-06	3.49719e-06	2.33751e-06	1.77679e-06	1.54274e-06	4.98238e-06	5.45325e-06	2.16168e-05	1.05423e-05	2.23204e-06	0	1.1571e-06	0	0	0	6.85063e-07	1.76262e-06	0	4.3197e-06	1.67897e-07	2.59234e-06	5.1339e-06	0	0	8.90443e-06	1.38255e-07	5.16376e-05	3.19188e-05	3.78948e-06	0	9.40715e-07	1.14267e-06	0	6.65486e-07	0	1.33412e-07	0	6.2262e-06	0	4.5264e-08	0	0	9.65395e-06	5.15307e-06
K00073	ureidoglycolate dehydrogenase (NAD+) [EC:1.1.1.350]	0	0	0	0	2.87697e-06	5.38029e-07	4.35807e-06	1.23603e-06	2.24799e-06	1.49022e-05	7.61897e-06	2.49551e-05	2.69059e-06	1.42039e-06	0	2.25331e-06	0	0	0	0	0	0	0	0	0	1.68576e-07	0	0	4.63236e-06	0	9.22539e-05	6.231e-05	8.37813e-06	0	0	0	0	0	0	0	0	0	0	4.5264e-06	0	0	0	0
K00074	3-hydroxybutyryl-CoA dehydrogenase [EC:1.1.1.157]	0.000652225	0.000555231	0.00033177	0.000188328	0.00017267	0.000474542	0.000343468	0.000354305	0.000565298	0.000546255	0.000368776	0.000364282	0.000363178	0.000377322	0.000282097	0.000448911	0.000651707	0.000228901	0.000434452	0.000406878	0.000410177	0.000377838	0.000553569	0.000336476	0.000326106	0.000340925	0.000357442	0.00050162	0.000174331	0.000320664	0.000512583	0.000454266	0.000322882	0.000521499	0.000212499	0.000382257	0.000647102	0.000488125	0.000566128	0.000480092	0.000419111	0.000153965	0.000189839	0.000290184	0.000395477	0.000313979	0.000410728	0.000314212
K00075	UDP-N-acetylmuramate dehydrogenase [EC:1.3.1.98]	0.00078442	0.000770295	0.00077074	0.000886316	0.000828118	0.000755987	0.000857779	0.000770325	0.000788601	0.000763125	0.000695616	0.000664673	0.000822058	0.000857051	0.000797476	0.000848838	0.000885149	0.000850789	0.000920432	0.00081841	0.000805726	0.000834299	0.000828854	0.000767701	0.000870905	0.000810704	0.000831021	0.000861293	0.000760878	0.000840025	0.000765429	0.000724268	0.000777613	0.000804358	0.000849319	0.000853599	0.000875869	0.000805202	0.000798303	0.000846841	0.00082597	0.000871774	0.000838059	0.000799025	0.0007907	0.000878647	0.000781224	0.000772281
K00076	7-alpha-hydroxysteroid dehydrogenase [EC:1.1.1.159]	7.65433e-06	3.8447e-05	3.5424e-05	2.76448e-05	6.67868e-06	1.89655e-05	1.84529e-05	2.57538e-05	1.29113e-05	1.32976e-05	1.09065e-06	1.30545e-05	1.18194e-05	4.83609e-06	1.91911e-05	1.75697e-05	5.01728e-05	1.14626e-05	3.51968e-06	2.73383e-05	4.53025e-06	0	1.20472e-05	1.83908e-06	7.84101e-06	4.42128e-05	3.34114e-05	1.8153e-05	1.64706e-06	1.00904e-05	1.31617e-05	1.03192e-05	2.99031e-05	3.33326e-05	1.65507e-05	2.21391e-05	1.17136e-05	1.89081e-05	3.82524e-05	6.67058e-06	1.01795e-05	1.7465e-05	4.92302e-07	4.86588e-05	8.32562e-06	1.64471e-05	5.66837e-06	3.64905e-05
K00077	2-dehydropantoate 2-reductase [EC:1.1.1.169]	0.000826162	0.000564271	0.000579617	0.000353035	0.000413466	0.000732774	0.000474719	0.00057193	0.000572432	0.000891395	0.000870705	0.000773603	0.000451351	0.000515782	0.000633365	0.00044997	0.000834013	0.000309401	0.000415058	0.000597696	0.000608081	0.00068183	0.000698859	0.000544518	0.000531714	0.000544187	0.000546292	0.000749758	0.000512193	0.000390708	0.000997358	0.000730358	0.000678857	0.000692412	0.000446999	0.000561372	0.000728821	0.000688362	0.000483565	0.000571823	0.000733508	0.000373675	0.000365515	0.000550721	0.000359481	0.00048129	0.00070442	0.000546757
K00078	dihydrodiol dehydrogenase / D-xylose 1-dehydrogenase (NADP) [EC:1.3.1.20 1.1.1.179]	0	0	0	0	0	0	0	0	0	0	0	0	0	0	0	0	0	0	0	0	0	0	0	0	0	0	0	0	4.63236e-06	0	0	0	0	0	0	0	0	0	0	0	0	0	0	4.5264e-06	0	0	0	0
K00082	5-amino-6-(5-phosphoribosylamino)uracil reductase [EC:1.1.1.193]	0	0	0	0	0	0	0	0	0	0	0	0	0	0	0	0	0	0	0	0	0	0	0	0	0	0	0	0	0	0	0	0	0	0	0	0	0	0	0	0	0	0	0	0	0	0	0	0
K00086	1,3-propanediol dehydrogenase [EC:1.1.1.202]	5.9093e-06	1.06748e-07	1.36107e-05	5.2508e-05	2.51221e-05	4.16524e-05	0.00010224	6.21877e-06	1.84394e-05	2.4463e-05	1.2153e-05	1.87437e-05	3.84711e-05	0.000101828	7.83458e-05	0.000105723	0.000126479	2.3328e-05	0.000144377	4.50572e-05	1.33353e-05	8.72958e-05	8.87938e-06	3.0507e-05	9.78047e-05	4.58986e-05	7.59301e-05	9.41852e-05	6.37207e-05	6.04626e-05	2.174e-05	2.64557e-05	6.56218e-05	4.37317e-05	6.97011e-05	0.000103375	4.28394e-05	3.20764e-05	5.1315e-05	0.000105982	1.37623e-05	5.26109e-05	5.89437e-05	7.07249e-06	0	0.000108251	9.60966e-05	1.49565e-05
K00087	xanthine dehydrogenase molybdenum-binding subunit [EC:1.17.1.4]	3.49402e-05	2.52281e-05	6.27441e-05	9.52162e-06	1.95223e-06	1.7755e-05	2.58384e-05	4.77416e-05	5.77855e-05	5.96988e-06	1.2971e-05	8.20892e-06	3.5314e-05	2.28277e-05	6.8283e-05	4.18841e-05	4.79721e-05	2.73878e-06	1.78096e-05	0.000117317	1.27884e-05	4.84837e-05	1.86707e-05	2.49249e-05	2.11547e-05	8.88854e-06	4.74518e-05	1.08304e-05	7.56104e-05	1.49962e-05	1.5096e-05	8.09858e-05	0.000224355	2.96026e-05	1.64331e-05	1.93539e-05	1.16929e-05	3.12279e-05	0.000120915	3.26414e-05	1.08051e-05	2.71769e-05	3.24541e-05	5.1609e-05	0.00013036	3.21802e-05	3.38331e-05	0.000117913
K00088	IMP dehydrogenase [EC:1.1.1.205]	0.000809456	0.00079896	0.000763387	0.00088029	0.000865985	0.000861531	0.000890917	0.000778154	0.000843689	0.000862724	0.000792782	0.000830812	0.000846233	0.000858719	0.000810074	0.000867052	0.000879337	0.000858079	0.000937872	0.000842573	0.000810239	0.000848939	0.000854704	0.000804493	0.000880583	0.000819065	0.000863276	0.000869496	0.000840383	0.000845191	0.000819972	0.000854616	0.000864689	0.000805867	0.000869278	0.000861571	0.00087235	0.000800235	0.000817575	0.000877837	0.00087434	0.000881679	0.000874773	0.000819805	0.000830448	0.000907003	0.000847266	0.000807354
K00090	glyoxylate/hydroxypyruvate/2-ketogluconate reductase [EC:1.1.1.79 1.1.1.81 1.1.1.215]	8.32855e-07	0	0	0	2.4146e-06	1.7486e-06	9.21568e-08	8.88395e-07	4.77515e-07	3.14204e-07	0	0	4.16609e-06	4.05826e-07	0	5.78552e-07	1.98674e-07	7.24971e-07	0	2.85443e-07	3.29655e-07	0	2.8798e-06	1.67897e-07	9.92128e-07	0	2.8912e-07	0	1.08088e-06	6.91273e-08	1.05125e-06	0	0	0	4.70358e-07	5.71333e-07	4.55298e-07	3.32743e-07	0	1.33412e-07	0	3.1131e-06	0	4.5264e-08	0	0	3.40988e-06	1.04737e-06
K00091	dihydroflavonol-4-reductase [EC:1.1.1.219]	9.91097e-05	3.19532e-05	5.26018e-07	5.56319e-07	1.495e-05	7.98077e-05	2.97141e-06	1.46392e-05	6.89825e-05	0.000122315	9.17315e-05	6.33455e-05	1.89302e-05	0	1.22478e-05	1.43116e-06	0.000105206	2.18458e-05	6.75779e-06	3.67651e-05	5.3126e-05	5.9578e-05	0.000103145	0	2.08027e-05	1.94245e-05	1.46367e-05	8.26532e-05	5.55883e-06	1.15212e-06	0.000128127	8.22504e-05	4.26973e-05	6.13668e-05	4.14503e-06	2.04608e-05	0.00011668	6.67815e-05	1.55878e-07	2.93861e-05	0.000102781	4.57029e-06	2.49938e-06	4.74463e-05	0	2.13741e-05	5.11039e-05	1.5962e-05
K00096	glycerol-1-phosphate dehydrogenase [NAD(P)+] [EC:1.1.1.261]	4.52518e-05	5.85334e-05	1.3808e-05	2.1782e-05	6.13411e-05	8.23633e-05	3.46449e-05	0.000158327	1.47662e-05	2.3296e-05	2.35658e-05	0.000104573	0.000157111	4.07855e-05	9.22324e-05	7.24408e-05	4.78193e-05	7.83246e-05	8.98926e-05	0.000116946	1.95921e-05	2.52144e-05	3.92613e-05	8.56793e-06	7.45376e-05	0.000111279	2.37259e-05	3.79503e-05	2.68677e-05	4.00084e-05	3.35561e-05	9.63635e-05	2.25493e-05	0.000147631	6.81431e-05	0.000115248	8.41059e-05	0.000124945	1.68348e-05	2.90304e-05	3.23394e-05	4.16223e-05	9.84604e-07	0.000110533	0.000125312	1.63995e-05	5.57759e-05	0.000194204
K00097	4-hydroxythreonine-4-phosphate dehydrogenase [EC:1.1.1.262]	0.000331169	0.000343244	0.0005503	0.00032708	0.000361591	0.000287218	0.000275972	0.000319809	0.000243263	0.000272176	0.000518461	0.000233153	0.000322237	0.000268034	0.000324565	0.000169658	0.000106927	5.54155e-05	6.01249e-05	0.000201561	0.000398565	0.000359834	0.000275745	0.000511907	0.000179245	0.000254454	0.000310253	0.000208928	0.000412739	0.000320284	0.000250591	0.000252724	0.00033733	0.000114199	0.000159273	0.000149868	0.000132285	0.000233899	0.000243474	0.000153343	0.000297143	0.000313835	0.000324986	0.000375268	0.000358453	0.000191736	0.000363558	0.000290695
K00098	L-idonate 5-dehydrogenase [EC:1.1.1.264]	0	0	0	0	0	0	0	0	0	0	0	0	0	0	0	0	0	0	0	0	0	0	0	0	0	0	0	0	0	0	2.83839e-07	9.10521e-07	2.81397e-08	0	0	0	0	0	0	0	0	0	0	0	0	0	0	0
K00099	1-deoxy-D-xylulose-5-phosphate reductoisomerase [EC:1.1.1.267]	0.000734528	0.000778437	0.000711968	0.000555956	0.000564841	0.000667078	0.000564187	0.000712712	0.000650742	0.000662338	0.000731616	0.000696763	0.000659886	0.00047731	0.000553747	0.000523968	0.000582701	0.000386107	0.000388696	0.000622418	0.000683693	0.000539423	0.000702615	0.00065621	0.000442023	0.000630339	0.000523433	0.000630733	0.000581537	0.000646989	0.000657082	0.000602925	0.000447193	0.000664227	0.000402462	0.000530536	0.000655463	0.000698117	0.000723253	0.000549368	0.000604744	0.000503417	0.000493466	0.000735258	0.000814265	0.000470548	0.000538827	0.000676704
K00100	butanol dehydrogenase [EC:1.1.1.-]	0.000700619	0.000648715	0.000758751	0.000702147	0.000814457	0.000721923	0.000606663	0.000733898	0.000785407	0.000721891	0.000721589	0.000715594	0.000718228	0.00061072	0.000643363	0.000643614	0.000594687	0.000735535	0.000461544	0.000700753	0.000661501	0.000670097	0.000694203	0.000719706	0.000616133	0.000680126	0.000647728	0.000671019	0.000701052	0.000704327	0.000673292	0.000662463	0.000750237	0.000719946	0.000691593	0.000646356	0.000669426	0.000737344	0.000811171	0.000610059	0.000583118	0.000794169	0.000637919	0.000751662	0.000870957	0.000605508	0.000707041	0.000785914
K00101	L-lactate dehydrogenase (cytochrome) [EC:1.1.2.3]	1.66571e-06	0	0	0	4.8292e-06	3.49719e-06	1.84314e-07	1.77679e-06	9.55029e-07	6.28408e-07	0	9.12103e-08	8.33218e-06	8.11652e-07	0	1.1571e-06	0	0	0	0	6.59311e-07	0	4.3197e-06	3.35794e-07	1.98426e-06	0	0	0	1.44118e-06	1.38255e-07	2.10251e-06	0	0	0	9.40715e-07	1.14267e-06	0	6.65486e-07	0	2.66823e-07	0	6.2262e-06	0	9.05279e-08	0	0	6.81976e-06	2.09475e-06
K00102	D-lactate dehydrogenase (cytochrome) [EC:1.1.2.4]	0	0	1.05204e-06	0	0	4.48358e-06	0	0	8.81565e-07	0	2.22025e-06	9.12103e-08	9.60925e-07	3.04369e-07	0	0	1.98674e-07	7.24971e-07	0	5.42342e-07	0	1.00858e-06	2.44783e-06	0	0	0	1.0842e-06	1.31544e-06	2.21324e-06	0	0	0	0	0	0	0	4.55298e-07	0	0	0	1.28903e-06	0	0	0	0	0	5.0484e-06	0
K00104	glycolate oxidase [EC:1.1.3.15]	3.78453e-05	3.31776e-05	1.61037e-05	2.27449e-05	5.33437e-05	0.000111271	3.72503e-05	1.14398e-05	7.60504e-05	0.000127215	0.000130998	0.000229345	3.18628e-05	3.24492e-05	2.18698e-05	3.0737e-05	6.38407e-05	6.96778e-05	6.10752e-05	5.19458e-05	2.37686e-05	2.11682e-05	4.96204e-05	5.80283e-05	1.25991e-05	1.94149e-05	5.36588e-05	1.8891e-05	9.39942e-05	4.16563e-05	0.000117197	0.000226977	0.000119406	1.57371e-05	2.72343e-05	1.37745e-05	5.7002e-05	6.41096e-06	3.79797e-05	6.59082e-05	6.28686e-05	2.92274e-05	4.47995e-05	2.68015e-05	4.35957e-05	5.8636e-05	7.44855e-05	3.56496e-05
K00105	alpha-glycerophosphate oxidase [EC:1.1.3.21]	0	0	0	0	4.57233e-06	0	2.1532e-06	0	5.8771e-07	4.9734e-06	5.45325e-06	2.25745e-05	3.12301e-06	1.42039e-06	0	1.26672e-06	1.74222e-06	0	1.58386e-06	1.2274e-06	0	0	0	0	0	0	0	7.01566e-07	0	4.83148e-07	5.06705e-05	3.35881e-05	4.2022e-06	1.29165e-06	5.87947e-07	9.99832e-08	0	0	4.67634e-07	0	0	0	0	6.06214e-07	8.54954e-07	0	4.87126e-07	0
K00108	choline dehydrogenase [EC:1.1.99.1]	8.32855e-07	1.4233e-07	0	0	2.4146e-06	2.01761e-06	1.19459e-06	1.50641e-06	1.30766e-06	5.70056e-06	1.70609e-06	6.68571e-06	4.83874e-06	4.05826e-07	0	5.78552e-07	0	0	0	6.85063e-07	3.29655e-07	0	2.15985e-06	1.67897e-07	9.92128e-07	8.42879e-08	0	0	7.20589e-07	6.91273e-08	2.24107e-05	1.51956e-05	2.29433e-06	0	4.70358e-07	5.71333e-07	0	3.32743e-07	0	1.33412e-07	0	3.1131e-06	0	4.5264e-08	0	0	3.40988e-06	1.04737e-06
K00111	glycerol-3-phosphate dehydrogenase [EC:1.1.5.3]	0.000393871	0.000598894	0.000498361	0.000332714	0.00034164	0.000346087	0.000353399	0.000528894	0.000434971	0.000344401	0.000238156	0.00047499	0.000526703	0.000434197	0.000358126	0.000469541	0.000464067	0.000754493	0.000366759	0.000555303	0.000369254	0.000244129	0.000445301	0.000408805	0.000304791	0.000438764	0.00046748	0.000372356	0.00036723	0.000478644	0.000391456	0.00044027	0.000442378	0.000552136	0.000465632	0.000488239	0.00047302	0.00049887	0.000576143	0.000417946	0.000228401	0.000308457	0.00021204	0.000463713	0.000559659	0.000339919	0.000371972	0.000636908
K00112	glycerol-3-phosphate dehydrogenase subunit B [EC:1.1.5.3]	8.32855e-07	0	0	0	2.4146e-06	1.7486e-06	9.21568e-08	8.88395e-07	4.77515e-07	3.14204e-07	6.23229e-07	4.92535e-06	4.59851e-06	4.05826e-07	0	5.78552e-07	0	0	0	0	3.29655e-07	0	2.15985e-06	1.67897e-07	9.92128e-07	0	0	0	7.20589e-07	6.91273e-08	1.05125e-06	0	0	0	4.70358e-07	5.71333e-07	0	3.32743e-07	0	1.33412e-07	0	3.1131e-06	0	4.5264e-08	0	0	3.40988e-06	1.04737e-06
K00113	glycerol-3-phosphate dehydrogenase subunit C	8.32855e-07	0	0	0	2.4146e-06	1.7486e-06	9.21568e-08	8.88395e-07	4.77515e-07	3.14204e-07	6.23229e-07	4.92535e-06	4.59851e-06	4.05826e-07	0	5.78552e-07	0	0	0	0	3.29655e-07	0	2.15985e-06	1.67897e-07	9.92128e-07	0	0	0	7.20589e-07	6.91273e-08	1.05125e-06	0	0	0	4.70358e-07	5.71333e-07	0	3.32743e-07	0	1.33412e-07	0	3.1131e-06	0	4.5264e-08	0	0	3.40988e-06	1.04737e-06
K00116	malate dehydrogenase (quinone) [EC:1.1.5.4]	1.66571e-06	2.84661e-07	0	0	4.8292e-06	4.03522e-06	2.38919e-06	3.01282e-06	2.61531e-06	1.14011e-05	2.16572e-06	3.3383e-06	8.81265e-06	8.11652e-07	0	1.1571e-06	1.98674e-07	7.24971e-07	0	1.91247e-06	6.59311e-07	0	5.03965e-06	3.35794e-07	1.98426e-06	1.68576e-07	2.8912e-07	0	1.80147e-06	1.38255e-07	4.64529e-05	3.03912e-05	4.58865e-06	0	9.40715e-07	1.14267e-06	4.55298e-07	6.65486e-07	0	2.66823e-07	1.5165e-07	6.2262e-06	0	9.05279e-08	0	0	6.81976e-06	2.09475e-06
K00117	quinoprotein glucose dehydrogenase [EC:1.1.5.2]	8.32855e-07	0	0	0	2.4146e-06	1.7486e-06	9.21568e-08	8.88395e-07	4.77515e-07	3.14204e-07	0	0	4.16609e-06	4.05826e-07	0	5.78552e-07	0	0	0	0	3.29655e-07	0	2.15985e-06	1.67897e-07	9.92128e-07	0	0	0	7.20589e-07	6.91273e-08	1.05125e-06	0	0	0	4.70358e-07	5.71333e-07	0	3.32743e-07	0	1.33412e-07	0	3.1131e-06	0	4.5264e-08	0	0	3.40988e-06	1.04737e-06
K00121	S-(hydroxymethyl)glutathione dehydrogenase / alcohol dehydrogenase [EC:1.1.1.284 1.1.1.1]	8.32855e-07	0	5.26018e-07	0	3.85309e-06	3.99039e-06	4.39855e-06	8.88395e-07	3.19567e-06	9.02214e-06	1.35552e-05	4.82502e-05	9.49923e-06	3.55098e-06	0	1.70521e-06	0	2.85477e-07	0	2.56899e-07	3.29655e-07	5.04288e-07	4.2717e-06	1.67897e-07	9.92128e-07	0	1.42753e-06	2.5651e-06	1.64706e-06	6.91273e-08	0.000100122	6.38377e-05	7.57897e-06	0	4.70358e-07	1.9461e-06	0	3.52707e-06	0	1.33412e-07	6.44514e-07	3.56197e-06	1.89347e-07	2.06598e-06	2.44272e-06	0	5.93408e-06	2.66033e-06
K00123	formate dehydrogenase major subunit [EC:1.17.1.9]	2.83171e-05	2.69182e-05	2.65968e-05	4.83142e-05	5.06809e-05	5.45203e-05	3.58421e-05	2.333e-05	2.73506e-05	3.43829e-05	5.40963e-05	9.33127e-05	4.49257e-05	2.96253e-05	3.10508e-05	4.74869e-05	0.000177401	0.000136101	0.000114354	0.000100961	4.38582e-05	8.19468e-06	7.37469e-05	4.86987e-05	1.47379e-05	2.05433e-05	5.83841e-05	2.87642e-05	9.30075e-05	5.13921e-05	8.28494e-05	0.00015357	7.63393e-05	5.28919e-05	1.61979e-05	3.38157e-05	0.000128021	3.67182e-05	6.32085e-05	9.28456e-05	3.3856e-05	9.13833e-05	2.36305e-05	3.59727e-05	1.54909e-05	6.11947e-05	5.35396e-05	3.14421e-05
K00124	formate dehydrogenase iron-sulfur subunit	5.23509e-06	3.32697e-06	3.17255e-06	9.6286e-07	8.42541e-06	4.0128e-06	2.30995e-06	2.81969e-06	2.20391e-06	1.34659e-06	7.38137e-06	8.16332e-06	6.16001e-06	1.96149e-06	1.9838e-06	2.95366e-06	7.97753e-06	1.04718e-06	1.63665e-06	1.7412e-06	2.90404e-06	3.25986e-06	3.71974e-06	9.68436e-07	2.70435e-06	4.78908e-07	4.1561e-07	4.38479e-07	7.20589e-07	1.76014e-06	2.56506e-06	2.88332e-06	4.44608e-06	7.64448e-07	1.0877e-06	2.3746e-06	3.39404e-06	2.94477e-06	3.05521e-06	2.1079e-06	3.43109e-06	5.17381e-06	2.23429e-06	1.5608e-06	2.72771e-06	3.90351e-06	4.49484e-06	3.2678e-06
K00127	formate dehydrogenase subunit gamma	4.0453e-06	1.47668e-06	1.90682e-06	9.6286e-07	5.00901e-06	1.7486e-06	1.85778e-06	8.88395e-07	1.7264e-06	1.34659e-06	2.96034e-06	4.92535e-06	4.59851e-06	1.2513e-06	1.16441e-06	2.16196e-06	4.76818e-06	5.79977e-07	9.8551e-07	6.70791e-07	2.08492e-06	3.25986e-06	2.75981e-06	9.68436e-07	2.20829e-06	4.78908e-07	2.3491e-07	0	7.20589e-07	1.63007e-06	1.05125e-06	7.8406e-07	1.96978e-06	7.64448e-07	1.0877e-06	1.73185e-06	2.11093e-06	2.02973e-06	1.69907e-06	1.57426e-06	9.09902e-07	4.4189e-06	1.68519e-06	1.5608e-06	2.72771e-06	2.23738e-06	4.49484e-06	2.49275e-06
K00128	aldehyde dehydrogenase (NAD+) [EC:1.2.1.3]	0.00030425	0.000285461	0.000297685	0.000311475	0.000267045	0.000273442	0.000275902	0.000365507	0.000206839	0.000298415	0.000183586	0.000355745	0.000318979	0.000174919	0.000207803	0.000291765	0.000309779	0.000239458	0.000169789	0.00031555	0.000237237	0.000180211	0.000325333	0.00018129	0.000170006	0.00033456	0.000237458	0.000347977	0.000241771	0.000299375	0.000425233	0.000296537	0.00015714	0.000328574	0.000195419	0.000267357	0.000284954	0.000323742	0.000280019	0.00024634	0.000190985	0.000212406	0.000168566	0.000400616	0.000343722	0.000268652	0.000184842	0.000428344
K00130	betaine-aldehyde dehydrogenase [EC:1.2.1.8]	8.32855e-07	1.4233e-07	0	0	2.4146e-06	2.01761e-06	4.85503e-06	1.50641e-06	1.30766e-06	5.70056e-06	1.70609e-06	6.68571e-06	4.83874e-06	4.05826e-07	0	5.78552e-07	1.98674e-07	7.24971e-07	0	9.70506e-07	3.29655e-07	0	3.88773e-06	1.67897e-07	9.92128e-07	8.42879e-08	2.81892e-06	2.63087e-07	1.08088e-06	6.91273e-08	2.24107e-05	1.51956e-05	3.68255e-06	0	4.70358e-07	5.71333e-07	4.55298e-07	3.32743e-07	0	1.33412e-07	0	3.1131e-06	1.13608e-07	4.5264e-08	1.22136e-07	6.18849e-07	3.40988e-06	2.97454e-06
K00131	glyceraldehyde-3-phosphate dehydrogenase (NADP+) [EC:1.2.1.9]	1.30877e-06	3.17859e-06	6.37797e-06	3.03836e-06	8.32267e-06	3.90071e-06	4.82316e-06	2.50682e-05	1.05053e-05	4.66817e-06	1.01988e-05	1.68132e-05	4.37221e-06	4.1259e-06	6.78518e-06	1.2789e-06	9.39881e-06	1.28723e-05	2.99173e-06	1.19124e-05	5.75058e-06	7.20411e-06	7.53548e-06	8.65447e-06	2.49632e-06	1.1034e-05	1.90819e-05	3.99016e-06	1.71397e-05	1.31565e-05	7.56904e-06	4.29968e-06	5.47787e-06	1.52626e-05	4.67418e-06	5.99899e-06	8.27814e-06	1.31157e-05	3.00314e-06	7.61336e-06	1.11084e-05	6.36576e-06	5.26384e-06	4.04143e-06	7.81672e-06	5.13312e-06	4.13304e-06	1.26523e-05
K00132	acetaldehyde dehydrogenase (acetylating) [EC:1.2.1.10]	0	2.85835e-06	5.91771e-06	0	0	0	2.82069e-06	2.43343e-06	1.07503e-05	1.79545e-07	2.17468e-06	2.58581e-07	5.57337e-06	7.20341e-06	1.01778e-05	1.25454e-05	5.59344e-06	0	4.92755e-06	2.07897e-05	0	2.73756e-06	0	4.63014e-06	2.40031e-06	8.81191e-07	1.01553e-05	0	4.01471e-06	1.85826e-06	5.29832e-06	1.36072e-05	4.15781e-05	6.74823e-06	1.76384e-06	4.14216e-06	0	1.0354e-05	2.65719e-05	9.74795e-06	1.13738e-06	4.52948e-06	0	0	2.01525e-05	5.03791e-06	7.54292e-06	1.80986e-05
K00133	aspartate-semialdehyde dehydrogenase [EC:1.2.1.11]	0.000746982	0.000783063	0.000753951	0.000745233	0.000625771	0.000736932	0.000797711	0.000725961	0.000705458	0.000739713	0.00077835	0.000810256	0.000794882	0.00080214	0.000744709	0.000814754	0.000830524	0.00083604	0.000834745	0.000746885	0.000792883	0.000740724	0.000778402	0.000770876	0.00071297	0.000719615	0.000701712	0.00078624	0.00069014	0.000751381	0.000786384	0.000759795	0.000699566	0.000746945	0.000785429	0.000761026	0.000798965	0.00075831	0.000788036	0.000785374	0.000857469	0.000628458	0.000766448	0.000779274	0.000822408	0.000723372	0.000714502	0.000698867
K00134		0.000816079	0.000788605	0.000770061	0.000884997	0.000872368	0.000867505	0.000890051	0.000780771	0.000855263	0.000883049	0.000821919	0.00088967	0.00085113	0.000875578	0.000813898	0.000871768	0.000933941	0.000912081	0.000962852	0.00084836	0.000824548	0.000848605	0.000870579	0.000810881	0.000877759	0.000828651	0.000887806	0.000874308	0.000845916	0.000867554	0.000897481	0.000951771	0.000884074	0.000820227	0.000866323	0.0008636	0.000912437	0.000807639	0.000822181	0.000904635	0.00087598	0.000886396	0.000874035	0.000800189	0.000826357	0.000919392	0.000845318	0.000812748
K00135	succinate-semialdehyde dehydrogenase / glutarate-semialdehyde dehydrogenase [EC:1.2.1.16 1.2.1.79 1.2.1.20]	6.98408e-05	8.00608e-06	3.72487e-05	0.000276619	0.000265503	0.000152487	0.000201885	5.60461e-05	0.000177915	0.000172318	3.36855e-05	6.83439e-05	0.000135545	0.000255603	0.000160573	0.000218114	0.000162378	7.00644e-05	0.000417364	0.000158892	9.70437e-05	0.000224714	0.000143654	0.000102194	0.000319241	0.000126593	0.000268014	0.000149105	0.000165684	0.000135935	8.37514e-05	0.000188536	0.000299225	7.80001e-05	0.000208405	0.000180862	0.000166018	5.6899e-05	4.243e-05	0.000223714	0.000258905	0.000309958	0.00029612	5.74432e-05	3.50124e-06	0.000340653	0.000211988	0.000108215
K00137	aminobutyraldehyde dehydrogenase [EC:1.2.1.19]	8.32855e-07	0	0	0	2.4146e-06	1.7486e-06	9.21568e-08	8.88395e-07	4.77515e-07	3.14204e-07	0	0	4.16609e-06	4.05826e-07	0	5.78552e-07	0	0	0	0	3.29655e-07	0	2.15985e-06	1.67897e-07	9.92128e-07	0	0	0	7.20589e-07	6.91273e-08	1.05125e-06	0	0	0	4.70358e-07	5.71333e-07	0	3.32743e-07	0	1.33412e-07	0	3.1131e-06	0	4.5264e-08	0	0	3.40988e-06	1.04737e-06
K00138	aldehyde dehydrogenase [EC:1.2.1.-]	8.32855e-07	1.4233e-07	5.26018e-07	0	2.4146e-06	3.99039e-06	9.21568e-08	8.88395e-07	9.18297e-07	6.28408e-07	1.94759e-07	9.12103e-08	4.64655e-06	4.05826e-07	0	5.78552e-07	0	0	0	9.41962e-07	3.29655e-07	5.04288e-07	3.02379e-06	1.67897e-07	9.92128e-07	0	3.9754e-07	6.57718e-07	1.64706e-06	6.91273e-08	1.33509e-06	9.10521e-07	2.81397e-08	0	4.70358e-07	5.71333e-07	0	3.32743e-07	0	1.33412e-07	6.44514e-07	3.1131e-06	0	4.5264e-08	0	0	5.93408e-06	1.04737e-06
K00140	malonate-semialdehyde dehydrogenase (acetylating) / methylmalonate-semialdehyde dehydrogenase [EC:1.2.1.18 1.2.1.27]	3.56938e-06	1.54073e-07	1.1671e-05	1.88293e-06	5.65119e-06	4.57325e-06	1.27314e-05	3.32182e-06	1.56357e-05	1.6967e-06	4.20017e-06	3.49791e-07	7.9137e-06	2.50259e-06	1.17591e-05	7.18623e-07	4.96685e-06	1.27273e-06	2.63976e-06	2.24738e-05	4.17452e-06	3.45797e-06	5.7596e-06	1.4228e-06	3.39244e-06	2.33707e-06	8.16763e-06	9.20805e-07	6.63972e-06	3.85998e-06	2.6828e-06	9.20638e-06	3.70758e-05	4.00676e-06	2.82215e-06	3.34944e-06	1.44867e-06	2.86724e-06	8.52122e-06	2.44588e-06	4.85281e-06	8.25467e-06	1.13608e-07	5.21829e-06	2.02746e-05	3.89542e-06	1.06428e-05	2.02352e-05
K00145	N-acetyl-gamma-glutamyl-phosphate reductase [EC:1.2.1.38]	0.000719706	0.000772717	0.000706478	0.000548082	0.000561347	0.000648482	0.000550001	0.000706648	0.000640268	0.000653509	0.000710759	0.000683303	0.000646841	0.000473201	0.000545912	0.000513488	0.000418963	0.000277216	0.000330243	0.0005665	0.000647844	0.000536217	0.0006305	0.000643293	0.000441287	0.00061507	0.000477346	0.000542709	0.000533644	0.000571302	0.000706016	0.000578424	0.000425081	0.000646064	0.000394091	0.000522932	0.000562231	0.000689016	0.00071461	0.000507237	0.000602839	0.000471659	0.000491308	0.000730954	0.000780189	0.000429835	0.000537144	0.000650133
K00146	phenylacetaldehyde dehydrogenase [EC:1.2.1.39]	1.66571e-06	0	0	0	4.8292e-06	3.49719e-06	1.84314e-07	1.77679e-06	9.55029e-07	6.28408e-07	0	0	8.33218e-06	8.11652e-07	0	1.1571e-06	0	0	0	0	6.59311e-07	0	4.3197e-06	3.35794e-07	1.98426e-06	0	0	0	1.44118e-06	1.38255e-07	2.10251e-06	0	0	0	9.40715e-07	1.14267e-06	0	6.65486e-07	0	2.66823e-07	0	6.2262e-06	0	9.05279e-08	0	0	6.81976e-06	2.09475e-06
K00147	glutamate-5-semialdehyde dehydrogenase [EC:1.2.1.41]	0.000717088	0.000769141	0.000703947	0.000608763	0.000604245	0.00069686	0.000657765	0.000714508	0.000658171	0.000664551	0.000736514	0.000725939	0.000702767	0.000618927	0.000645289	0.000652782	0.000534606	0.000680928	0.000489543	0.000609045	0.000676095	0.000631329	0.000637651	0.000690676	0.000587065	0.000666784	0.000560197	0.000642112	0.000612497	0.00062233	0.000705976	0.000589887	0.000534352	0.000708657	0.000659608	0.000678727	0.00060923	0.000735767	0.000754249	0.000621829	0.000614686	0.000556944	0.000587136	0.000723437	0.000781349	0.00053254	0.000655605	0.000665571
K00151	5-carboxymethyl-2-hydroxymuconic-semialdehyde dehydrogenase [EC:1.2.1.60]	8.32855e-07	0	0	0	2.4146e-06	1.7486e-06	9.21568e-08	8.88395e-07	4.77515e-07	3.14204e-07	0	0	4.16609e-06	4.05826e-07	0	5.78552e-07	0	0	0	0	3.29655e-07	0	2.15985e-06	1.67897e-07	9.92128e-07	0	0	0	7.20589e-07	6.91273e-08	1.05125e-06	0	0	0	4.70358e-07	5.71333e-07	0	3.32743e-07	0	1.33412e-07	0	3.1131e-06	0	4.5264e-08	0	0	3.40988e-06	1.04737e-06
K00153	S-(hydroxymethyl)mycothiol dehydrogenase [EC:1.1.1.306]	0	0	0	0	0	0	3.66043e-06	0	0	0	0	0	0	0	0	0	0	0	0	0	0	0	1.00793e-06	0	0	0	2.5298e-06	2.63087e-07	0	0	0	0	1.38823e-06	0	0	0	0	0	0	0	0	0	1.13608e-07	0	1.22136e-07	6.18849e-07	0	1.92717e-06
K00154	coniferyl-aldehyde dehydrogenase [EC:1.2.1.68]	0	0	0	0	0	0	0	0	0	0	0	9.12103e-08	0	0	0	0	0	0	0	0	0	0	0	0	0	0	0	0	0	0	0	0	0	0	0	0	0	0	0	0	0	0	0	0	0	0	0	0
K00156	pyruvate dehydrogenase (quinone) [EC:1.2.5.1]	0.000147495	5.10372e-05	0.000192895	0.000124473	0.000163953	0.000165153	0.0001073	8.61423e-05	7.84593e-05	0.000154574	0.000391544	0.00017599	0.000126044	3.93594e-05	0.000207442	6.07075e-05	1.83187e-05	2.44879e-05	1.43251e-05	5.87156e-05	0.0002295	0.000218309	0.000105081	0.000171635	0.000114004	0.000102946	4.70543e-05	0.000103539	0.000212917	0.000120726	0.000133439	0.000147066	0.0001206	3.01035e-05	0.000100911	4.97416e-05	4.61506e-05	8.96409e-05	4.4602e-05	6.22499e-05	0.000166278	0.000166542	0.000208679	0.000163326	0.000104745	5.47763e-05	0.000116371	4.44576e-05
K00158	pyruvate oxidase [EC:1.2.3.3]	6.73423e-05	7.75701e-06	3.44871e-05	0.000266819	0.000258773	0.000142309	0.000189852	5.3381e-05	0.000174939	0.0001738	3.41919e-05	8.20254e-05	0.000118914	0.000241365	0.000153098	0.000209131	0.000152673	8.60621e-05	0.000384314	0.000144377	9.65563e-05	0.000212773	0.000130359	9.73196e-05	0.000318249	0.000123374	0.000249004	0.000136257	0.00015575	0.000129372	0.000126611	0.000217774	0.000298108	7.78683e-05	0.000233569	0.000171971	0.00015952	5.40374e-05	3.99048e-05	0.000209083	0.000254924	0.000296048	0.000291784	5.58525e-05	3.25697e-06	0.000316565	0.000188075	9.79503e-05
K00161	pyruvate dehydrogenase E1 component alpha subunit [EC:1.2.4.1]	4.28325e-05	3.03637e-05	2.49638e-05	6.91407e-05	9.02305e-05	0.000159167	0.000146406	2.50554e-05	9.15946e-05	0.000142176	0.000134142	0.000241735	7.57872e-05	0.000166095	0.000122555	0.000174609	0.000146525	0.000415243	0.000164193	5.44768e-05	4.79725e-05	0.000110661	3.41415e-05	0.000103248	0.000152905	8.76287e-05	0.000123797	0.000112594	0.00015038	8.13495e-05	0.000146296	0.000208597	0.000214068	7.13046e-05	0.000292406	0.000175517	5.35596e-05	5.61337e-05	7.81469e-05	0.000167174	7.39421e-05	0.000102517	0.000137561	3.26818e-05	5.39569e-05	0.000151745	0.000187647	7.55436e-05
K00162	pyruvate dehydrogenase E1 component beta subunit [EC:1.2.4.1]	4.28325e-05	3.03637e-05	2.49638e-05	6.91407e-05	9.02305e-05	0.000159167	0.000146406	2.50554e-05	9.15946e-05	0.000142176	0.000134142	0.000241735	7.57872e-05	0.000165926	0.000122555	0.000174609	0.000146525	0.000415243	0.000163771	5.44768e-05	4.79725e-05	0.000110661	3.41415e-05	0.000103248	0.000152905	8.76287e-05	0.000123797	0.000112594	0.00015038	8.13495e-05	0.000146296	0.000208597	0.000214068	7.13046e-05	0.000292406	0.000175517	5.35596e-05	5.61337e-05	7.81469e-05	0.000167174	7.39421e-05	0.000102517	0.000137561	3.26818e-05	5.39569e-05	0.000151745	0.000187647	7.55436e-05
K00163	pyruvate dehydrogenase E1 component [EC:1.2.4.1]	8.32855e-07	0	0	0	2.4146e-06	1.7486e-06	3.75259e-06	8.88395e-07	4.77515e-07	3.14204e-07	6.23229e-07	5.01657e-06	4.59851e-06	4.05826e-07	0	5.78552e-07	0	0	0	0	3.29655e-07	0	3.16778e-06	1.67897e-07	9.92128e-07	0	2.5298e-06	2.63087e-07	7.20589e-07	6.91273e-08	1.05125e-06	0	1.38823e-06	0	4.70358e-07	5.71333e-07	0	3.32743e-07	0	1.33412e-07	0	3.1131e-06	1.13608e-07	4.5264e-08	1.22136e-07	6.18849e-07	3.40988e-06	2.97454e-06
K00164	2-oxoglutarate dehydrogenase E1 component [EC:1.2.4.2]	2.81584e-05	2.8122e-05	3.10121e-06	9.44331e-06	4.64081e-05	0.000100881	1.4286e-05	1.05321e-05	5.67361e-05	0.000111483	0.000101695	0.000169314	1.81797e-05	2.91958e-06	1.13758e-05	1.80773e-05	3.61587e-07	7.52359e-06	0	1.2274e-06	7.25041e-06	1.41082e-05	2.10864e-05	4.67722e-05	7.4144e-06	1.37236e-05	2.24068e-05	5.45161e-06	6.57111e-05	8.5428e-06	6.90918e-05	0.000141168	7.67457e-05	0	1.44244e-05	5.71333e-07	4.55298e-07	3.32743e-07	2.28414e-05	3.31484e-05	5.33176e-05	2.10678e-05	3.82102e-05	2.23406e-05	3.98298e-05	2.8261e-05	7.14007e-05	2.67989e-05
K00166	2-oxoisovalerate dehydrogenase E1 component alpha subunit [EC:1.2.4.4]	2.73256e-05	2.8122e-05	2.57519e-06	9.44331e-06	4.39935e-05	9.68901e-05	1.05334e-05	9.64372e-06	5.58178e-05	0.000111169	9.90467e-05	0.000164297	1.31008e-05	2.20938e-06	1.13758e-05	1.74988e-05	3.61587e-07	7.52359e-06	0	1.2274e-06	6.92076e-06	1.36039e-05	1.70547e-05	4.66043e-05	6.42227e-06	1.37236e-05	1.94794e-05	4.5308e-06	6.4064e-05	8.47367e-06	6.80406e-05	0.000141168	7.53574e-05	0	1.3954e-05	0	4.55298e-07	0	2.28414e-05	3.30149e-05	5.26731e-05	1.79547e-05	3.80966e-05	2.22953e-05	3.97077e-05	2.76421e-05	6.54666e-05	2.38244e-05
K00167	2-oxoisovalerate dehydrogenase E1 component beta subunit [EC:1.2.4.4]	2.73256e-05	2.8122e-05	2.57519e-06	9.44331e-06	4.39935e-05	9.68901e-05	1.05334e-05	9.64372e-06	5.58178e-05	0.000111169	9.90467e-05	0.000164297	1.31008e-05	2.20938e-06	1.13758e-05	1.74988e-05	3.61587e-07	7.52359e-06	0	1.2274e-06	6.92076e-06	1.36039e-05	1.70547e-05	4.66043e-05	6.42227e-06	1.37236e-05	1.94794e-05	4.5308e-06	6.4064e-05	8.47367e-06	6.80406e-05	0.000141168	7.53574e-05	0	1.3954e-05	0	4.55298e-07	0	2.28414e-05	3.30149e-05	5.26731e-05	1.79547e-05	3.80966e-05	2.22953e-05	3.97077e-05	2.76421e-05	6.54666e-05	2.38244e-05
K00169	pyruvate ferredoxin oxidoreductase alpha subunit [EC:1.2.7.1]	3.58921e-05	5.25555e-05	3.26953e-05	1.79948e-05	1.27922e-05	1.44371e-05	4.42697e-05	4.64862e-05	3.46014e-05	1.95704e-05	1.60092e-05	8.36854e-06	1.28284e-05	1.79916e-05	9.61712e-06	0.000112726	4.37389e-05	6.81022e-06	2.91254e-05	3.85633e-05	3.19458e-05	1.67316e-05	1.05833e-05	1.0169e-05	1.88984e-05	1.72024e-05	1.70219e-05	2.31298e-05	2.40883e-05	4.3409e-05	3.65837e-06	1.54789e-05	1.1875e-05	1.21257e-05	3.19255e-05	3.08163e-05	3.60099e-05	2.5355e-05	7.11739e-05	6.16184e-05	5.92195e-05	6.85543e-06	2.39334e-05	2.15206e-05	3.50124e-05	2.56346e-05	9.05611e-06	4.63148e-05
K00170		3.91838e-05	5.71812e-05	3.26953e-05	1.9407e-05	1.25354e-05	1.86517e-05	4.42697e-05	5.23574e-05	3.88256e-05	2.22636e-05	1.60092e-05	1.34763e-05	1.72006e-05	1.79916e-05	1.70348e-05	0.000112726	4.37389e-05	6.81022e-06	2.98645e-05	4.50144e-05	3.19458e-05	1.67316e-05	1.22631e-05	6.75049e-06	1.88984e-05	1.93479e-05	1.6263e-05	2.31298e-05	6.17648e-06	4.3409e-05	8.11569e-06	1.54789e-05	1.52892e-05	1.34965e-05	3.19255e-05	3.08163e-05	3.67549e-05	2.79171e-05	7.11739e-05	6.59587e-05	5.92195e-05	6.32495e-06	2.39334e-05	4.86992e-06	3.50124e-05	2.56346e-05	9.05611e-06	4.86609e-05
K00171	pyruvate ferredoxin oxidoreductase delta subunit [EC:1.2.7.1]	3.53963e-05	5.10788e-05	3.15611e-05	1.43145e-05	1.21501e-05	1.44371e-05	4.29347e-05	4.64862e-05	3.38117e-05	1.8538e-05	1.55028e-05	8.36854e-06	1.28284e-05	1.74505e-05	8.45272e-06	0.00011093	3.89707e-05	6.23024e-06	2.81398e-05	3.78926e-05	2.89201e-05	1.61012e-05	9.9833e-06	6.75049e-06	1.76823e-05	1.67235e-05	1.58293e-05	2.31298e-05	6.17648e-06	3.96925e-05	3.65837e-06	1.46948e-05	9.90518e-06	1.1124e-05	3.13082e-05	2.96557e-05	3.3899e-05	2.3658e-05	6.86642e-05	6.01776e-05	5.83475e-05	4.36626e-06	2.22483e-05	3.35438e-06	3.27122e-05	2.35877e-05	8.48042e-06	4.57073e-05
K00172	pyruvate ferredoxin oxidoreductase gamma subunit [EC:1.2.7.1]	3.91838e-05	8.68927e-05	3.26953e-05	1.99205e-05	1.75187e-05	1.86517e-05	4.42697e-05	7.60737e-05	4.42987e-05	2.22636e-05	1.60092e-05	1.34763e-05	1.72006e-05	2.69536e-05	1.87024e-05	0.000112726	4.37389e-05	6.81022e-06	4.70757e-05	7.01619e-05	3.64928e-05	1.67316e-05	1.22631e-05	1.0169e-05	3.25642e-05	2.91943e-05	1.70219e-05	3.29078e-05	1.94559e-05	5.58222e-05	8.11569e-06	2.05373e-05	1.98291e-05	1.90058e-05	4.44194e-05	4.71349e-05	6.12582e-05	3.33741e-05	8.67928e-05	8.06874e-05	0.000100393	7.79397e-06	3.70741e-05	1.69942e-05	6.1231e-05	2.56346e-05	9.05611e-06	4.86609e-05
K00174	2-oxoglutarate/2-oxoacid ferredoxin oxidoreductase subunit alpha [EC:1.2.7.3 1.2.7.11]	0.000667216	0.000340537	0.000691073	0.000697004	0.000669358	0.000531663	0.000559017	0.000471448	0.000416684	0.000496734	0.00098794	0.000353635	0.00085998	0.000333115	0.000578561	0.000387325	0.000457317	0.000233533	0.000375515	0.000490144	0.000796138	0.000804285	0.000651771	0.000578595	0.000361551	0.000420681	0.000358147	0.000535733	0.000646188	0.00059102	0.000589008	0.000497637	0.000310055	0.000314887	0.000296913	0.000361404	0.000632174	0.000547068	0.000318542	0.000368139	0.000603588	0.000646716	0.00065355	0.000869957	0.000844592	0.000380735	0.000430833	0.000383234
K00175	2-oxoglutarate/2-oxoacid ferredoxin oxidoreductase subunit beta [EC:1.2.7.3 1.2.7.11]	0.000667216	0.000340537	0.000691073	0.000697004	0.000669358	0.000531663	0.000559017	0.000471448	0.000416684	0.000496734	0.0009872	0.000353635	0.00085998	0.000333115	0.000578561	0.000387325	0.000457317	0.000233533	0.000375515	0.000490144	0.000796138	0.000804285	0.000651771	0.000578595	0.000361551	0.000420681	0.000358147	0.000535733	0.000646188	0.00059102	0.000589008	0.000497637	0.000310055	0.000314887	0.000296913	0.000361404	0.000632174	0.000547068	0.000318542	0.000368139	0.000603588	0.000646716	0.00065355	0.000869957	0.000844592	0.000380735	0.000430833	0.000383234
K00176	2-oxoglutarate ferredoxin oxidoreductase subunit delta [EC:1.2.7.3]	0.000392007	0.000194824	0.000362698	0.000383582	0.000366043	0.000331673	0.000306141	0.000268933	0.000259584	0.000318334	0.000554985	0.000239963	0.000448608	0.000181818	0.000314698	0.000167734	0.000344822	0.000197397	0.000237869	0.000313245	0.000449197	0.000434354	0.000415663	0.000326036	0.000200938	0.000243458	0.000233076	0.000318314	0.000374102	0.000320132	0.000363419	0.00033817	0.000211639	0.000226613	0.000151712	0.000204608	0.000422309	0.000326795	0.000194731	0.00020677	0.00036907	0.000370336	0.000357894	0.000479121	0.0005163	0.000235056	0.000252442	0.000225122
K00177	2-oxoglutarate ferredoxin oxidoreductase subunit gamma [EC:1.2.7.3]	0.000392007	0.000194824	0.000362698	0.000383582	0.000366043	0.000331673	0.000306141	0.000268933	0.000259584	0.000318334	0.000555726	0.000239963	0.000448608	0.000181818	0.000314698	0.000167734	0.000344822	0.000197397	0.000237869	0.000313245	0.000449197	0.000434354	0.000415663	0.000326036	0.000200938	0.000243458	0.000233076	0.000318314	0.000378734	0.000320132	0.000363419	0.00033817	0.000211639	0.000226613	0.000151712	0.000204608	0.000422309	0.000326795	0.000194731	0.00020677	0.00036907	0.000370336	0.000357894	0.000483648	0.0005163	0.000235056	0.000252442	0.000225122
K00179	indolepyruvate ferredoxin oxidoreductase, alpha subunit [EC:1.2.7.8]	0.00024364	0.00014193	0.000298696	0.000243197	0.000219241	0.000168145	0.000268482	0.00016698	0.000112727	0.000127948	0.000383529	0.000151238	0.000299857	0.00011588	0.000303886	0.000159521	0.000246402	0.000117195	0.000171769	0.000271827	0.000279095	0.000291118	0.00022952	0.000224302	0.000164581	0.000176995	0.000115512	0.000169976	0.000245515	0.000212808	0.000168085	0.000199703	0.000212974	0.000141897	0.000156504	0.000145699	0.000222668	0.000188133	0.000199755	0.000178822	0.000211031	0.000276227	0.000295154	0.000292498	0.000585623	0.000160715	0.000120608	0.000153618
K00180	indolepyruvate ferredoxin oxidoreductase, beta subunit [EC:1.2.7.8]	0.00024364	0.00014193	0.000298696	0.000243197	0.000219241	0.000168145	0.000268482	0.00016698	0.000112727	0.000127948	0.000383529	0.000151238	0.000299857	0.00011588	0.000303886	0.000159521	0.000246402	0.000117195	0.000171769	0.000271827	0.000279095	0.000291118	0.00022952	0.000224302	0.000164581	0.000176995	0.000115512	0.000169976	0.000248192	0.000212808	0.000168085	0.000199703	0.000212974	0.000141897	0.000156504	0.000145699	0.000222668	0.000188133	0.000199755	0.000178822	0.000211031	0.000276227	0.000295154	0.000297025	0.000585623	0.000160715	0.000120608	0.000153618
K00183		5.03679e-06	1.06748e-05	7.33138e-06	2.18248e-06	1.48215e-05	4.84227e-06	2.82069e-06	7.72517e-06	1.57947e-06	2.06477e-06	4.90793e-06	6.56714e-06	0	1.0822e-06	5.6064e-06	6.45542e-06	2.26947e-05	3.02877e-06	4.57558e-06	5.62323e-06	6.78702e-06	1.26072e-06	5.03965e-06	0	4.41657e-06	9.57817e-07	0	0	0	2.08125e-06	1.68201e-06	9.96515e-06	1.38447e-05	1.5289e-06	1.23469e-06	2.32104e-06	9.3543e-06	7.05415e-06	8.07448e-06	2.88169e-06	1.10705e-05	4.6519e-06	5.5668e-06	3.61708e-06	4.60046e-06	9.52076e-06	1.15139e-06	4.31518e-06
K00184	dimethyl sulfoxide reductase iron-sulfur subunit	3.96003e-05	4.89556e-05	1.7879e-05	1.47711e-05	7.30715e-05	0.000105095	1.6838e-05	2.25448e-05	5.96893e-05	0.000110944	0.000107312	0.00017412	1.28605e-05	4.91489e-06	2.29336e-05	3.12013e-05	4.71111e-05	1.29689e-05	9.48554e-06	1.08468e-05	2.14309e-05	1.93852e-05	2.6054e-05	4.74049e-05	1.59755e-05	1.60339e-05	1.94252e-05	4.5308e-06	6.37037e-05	1.41971e-05	4.79932e-05	0.000144587	0.000100246	3.82224e-06	1.70408e-05	5.8026e-06	1.95364e-05	1.48902e-05	3.95204e-05	4.02192e-05	7.30511e-05	2.79114e-05	5.03663e-05	3.2803e-05	5.16364e-05	4.75643e-05	6.88544e-05	3.3125e-05
K00185	dimethyl sulfoxide reductase membrane subunit	3.65861e-05	4.13409e-05	1.30791e-05	1.11337e-05	6.40552e-05	0.000102674	1.37159e-05	1.86822e-05	5.7816e-05	0.000108879	0.000104352	0.000170837	1.28605e-05	3.83269e-06	1.8966e-05	2.60857e-05	3.01933e-05	1.08746e-05	6.21224e-06	7.36443e-06	1.62822e-05	1.81245e-05	2.29342e-05	4.74049e-05	1.25511e-05	1.5076e-05	1.94252e-05	4.5308e-06	6.37037e-05	1.21159e-05	4.71521e-05	0.000138821	9.13539e-05	2.29335e-06	1.58061e-05	3.48156e-06	1.27483e-05	9.66618e-06	3.37841e-05	3.73375e-05	6.7023e-05	2.45653e-05	4.58977e-05	2.62559e-05	4.70359e-05	4.07569e-05	6.7703e-05	3.036e-05
K00194	acetyl-CoA decarbonylase/synthase, CODH/ACS complex subunit delta [EC:2.1.1.245]	3.94119e-05	4.44694e-05	6.64098e-06	2.24239e-05	4.7059e-05	6.80944e-05	1.76562e-05	0.000133182	9.79823e-06	2.68196e-05	2.52116e-05	6.66633e-05	4.09114e-05	1.19211e-05	7.14887e-05	5.94615e-05	5.44367e-05	0.000132831	5.00411e-05	8.20078e-05	2.63875e-05	6.44768e-06	5.19084e-05	3.61324e-06	7.44416e-05	0.000107917	3.17399e-05	4.06251e-05	4.45993e-05	5.03031e-05	3.1422e-05	9.09383e-05	4.00897e-05	0.000127057	6.48726e-05	9.5725e-05	6.75289e-05	7.62813e-05	1.20104e-05	2.86835e-05	2.5828e-05	3.15533e-05	0	5.77722e-05	4.24627e-05	2.34806e-05	3.1796e-05	0.000190674
K00196	anaerobic carbon-monoxide dehydrogenase iron sulfur subunit	0.000143796	8.78919e-05	3.77418e-05	2.39645e-05	8.25074e-05	0.000153865	3.52263e-05	0.000166593	9.55672e-05	0.000159055	0.000131543	0.000187091	0.000184666	5.23346e-05	0.000124189	7.24028e-05	0.000231104	0.000161116	0.0001374	0.000218973	8.67017e-05	0.000152079	0.000178812	2.00567e-05	0.000102573	0.000133204	7.84689e-05	0.000140905	8.48494e-05	6.72505e-05	0.000175486	0.000267428	0.000157038	0.000210381	7.69549e-05	0.000145967	0.000263183	0.000163166	3.54024e-05	7.49329e-05	0.000138428	5.92607e-05	6.60063e-05	0.000199182	0.000166512	8.35961e-05	0.000107979	0.000237932
K00197	acetyl-CoA decarbonylase/synthase, CODH/ACS complex subunit gamma [EC:2.1.1.245]	3.95904e-05	4.44694e-05	6.64098e-06	2.24239e-05	4.7059e-05	6.9148e-05	1.81084e-05	0.000133182	1.02757e-05	2.68196e-05	2.86588e-05	6.82595e-05	4.24729e-05	1.26313e-05	7.14887e-05	5.94615e-05	5.44367e-05	0.000132831	5.00411e-05	8.20078e-05	2.63875e-05	6.44768e-06	5.19084e-05	3.61324e-06	7.44416e-05	0.000107917	3.19206e-05	4.10635e-05	4.45993e-05	5.04332e-05	3.25153e-05	9.09383e-05	4.00897e-05	0.000127057	6.48726e-05	9.63677e-05	6.75289e-05	7.62813e-05	1.21974e-05	2.92172e-05	2.5828e-05	3.16554e-05	0	5.77722e-05	4.24627e-05	2.379e-05	3.1796e-05	0.000190674
K00198	anaerobic carbon-monoxide dehydrogenase catalytic subunit [EC:1.2.7.4]	0.000102471	0.00010034	2.49366e-05	6.02109e-05	0.000105934	0.000147297	5.48635e-05	0.000281158	5.37479e-05	8.04811e-05	9.07932e-05	0.0001749	0.000101233	4.13604e-05	0.000161172	0.000132146	0.000187976	0.000338407	0.000146005	0.000223207	7.00685e-05	3.36792e-05	0.000143846	2.04678e-05	0.0001569	0.000225096	0.000110037	0.000104183	0.000152327	0.000134538	8.87785e-05	0.000250726	0.00015056	0.000280553	0.000139424	0.000211884	0.00019962	0.000175417	4.90314e-05	0.000121443	6.77403e-05	8.37444e-05	1.2478e-05	0.000144016	0.000133088	8.42387e-05	7.49359e-05	0.00041896
K00208	enoyl-[acyl-carrier protein] reductase I [EC:1.3.1.9 1.3.1.10]	0.000269062	0.000146995	0.000334748	0.000363947	0.000366266	0.000328288	0.0003445	0.000202136	0.000208457	0.00028285	0.000526212	0.000261584	0.000347489	0.000257009	0.000360805	0.000273602	0.000178205	0.000444729	0.000197991	0.000144192	0.0003684	0.000435026	0.000245603	0.000329038	0.000305757	0.000250323	0.000208952	0.000301688	0.000403371	0.000317971	0.000271774	0.000240756	0.000282738	0.000129014	0.000409341	0.000285106	0.000174172	0.000235607	0.00015321	0.000239349	0.000281201	0.000360003	0.000415172	0.000354414	0.000263248	0.000265887	0.000339276	0.000176427
K00209	enoyl-[acyl-carrier protein] reductase / trans-2-enoyl-CoA reductase (NAD+) [EC:1.3.1.9 1.3.1.44]	3.72802e-05	4.21654e-05	6.4766e-06	1.88721e-05	4.47472e-05	6.27701e-05	1.19287e-05	0.000131714	8.22794e-06	2.21289e-05	1.41006e-05	5.62767e-05	3.75241e-05	9.53691e-06	6.63855e-05	5.59673e-05	2.2007e-06	7.55858e-05	8.55282e-06	4.82399e-05	1.68171e-05	6.44768e-06	3.15818e-05	0	7.42496e-05	0.00010513	1.15467e-05	3.28201e-05	1.85294e-05	3.40062e-05	6.59768e-05	6.80868e-05	2.22116e-05	0.000114905	6.36453e-05	9.15382e-05	2.06954e-05	7.54993e-05	1.10362e-05	4.87397e-06	2.54394e-05	2.56671e-05	0	5.8439e-05	4.24627e-05	6.95016e-06	3.05118e-05	0.000188087
K00210		0.000119336	2.30575e-05	0.00019032	0.00011503	0.000117545	6.67829e-05	9.41162e-05	7.62282e-05	2.29942e-05	4.84772e-05	0.00029358	1.33623e-05	0.000109017	3.67441e-05	0.000196066	4.26302e-05	1.81558e-05	1.76893e-05	1.43251e-05	5.87156e-05	0.00022225	0.000204705	8.5578e-05	0.000124862	0.00010659	8.93068e-05	2.53341e-05	9.87454e-05	0.000148493	0.000112183	8.73383e-05	2.10937e-05	4.61491e-05	3.01035e-05	8.6487e-05	4.91703e-05	4.61506e-05	8.93082e-05	2.17606e-05	2.91015e-05	0.000113757	0.000145474	0.000170469	0.000140985	6.49154e-05	2.65153e-05	4.74948e-05	1.76587e-05
K00215	4-hydroxy-tetrahydrodipicolinate reductase [EC:1.17.1.8]	0.000770758	0.000822233	0.000804581	0.000789139	0.00066759	0.000786678	0.000858361	0.000756958	0.000730993	0.000777777	0.000833285	0.00093716	0.000928512	0.000853984	0.000799695	0.000869473	0.00102449	0.000972427	0.0010099	0.000923327	0.000844091	0.000754592	0.000852796	0.000847387	0.000722187	0.00078128	0.00076689	0.000857514	0.000794626	0.000804569	0.000850784	0.000945516	0.000796391	0.000812688	0.000804067	0.000809768	0.000971585	0.000810955	0.000864801	0.00087982	0.000890605	0.000724525	0.000796365	0.000894046	0.000945338	0.000772776	0.000770315	0.000735127
K00216	2,3-dihydro-2,3-dihydroxybenzoate dehydrogenase [EC:1.3.1.28]	8.32855e-07	0	0	0	2.4146e-06	1.7486e-06	9.21568e-08	8.88395e-07	4.77515e-07	3.14204e-07	0	0	4.16609e-06	4.05826e-07	0	5.78552e-07	1.98674e-07	7.24971e-07	0	2.85443e-07	3.29655e-07	0	2.8798e-06	1.67897e-07	9.92128e-07	0	2.8912e-07	0	1.08088e-06	6.91273e-08	1.05125e-06	0	0	0	4.70358e-07	5.71333e-07	4.55298e-07	3.32743e-07	0	1.33412e-07	0	3.1131e-06	0	4.5264e-08	0	0	3.40988e-06	1.04737e-06
K00218	protochlorophyllide reductase [EC:1.3.1.33]	0	0	0	0	0	0	0	0	0	0	0	0	0	0	0	0	0	0	0	0	0	0	0	0	0	0	0	0	4.63236e-06	0	0	0	0	0	0	0	0	0	0	0	0	0	0	4.5264e-06	0	0	0	0
K00219	2,4-dienoyl-CoA reductase (NADPH2) [EC:1.3.1.34]	1.11047e-06	0	8.35054e-06	0	2.4146e-06	2.95916e-06	2.84825e-06	3.32182e-06	5.73017e-06	5.38635e-07	2.37606e-06	5.47262e-06	7.86565e-06	1.07882e-05	1.01778e-05	1.76611e-06	2.17013e-06	0	0	1.87536e-05	3.29655e-07	2.73756e-06	2.15985e-06	8.08674e-06	3.39244e-06	6.74303e-06	1.62269e-05	7.45414e-07	5.35295e-06	1.74156e-06	1.05125e-06	9.20638e-06	3.4443e-05	7.24908e-06	2.2342e-06	7.53445e-06	0	3.6269e-06	6.11042e-06	2.62376e-06	0	7.64258e-06	1.89347e-07	4.57166e-06	2.07224e-05	0	7.8383e-06	1.96487e-05
K00220	cyclohexadieny/prephenate dehydrogenase [EC:1.3.1.43 1.3.1.12]	0	0	5.26018e-07	0	0	2.24179e-06	0	0	4.40783e-07	0	2.02549e-06	0	4.80463e-07	3.04369e-07	0	0	0	0	0	0	0	5.04288e-07	8.6394e-07	0	0	0	3.9754e-07	6.57718e-07	9.26472e-07	0	0	0	0	0	0	0	0	0	0	0	6.44514e-07	0	0	0	0	0	2.5242e-06	0
K00221	alkylmercury lyase [EC:4.99.1.2]	0	0	0	0	0	2.69015e-07	1.10244e-06	6.18014e-07	8.30141e-07	5.07215e-06	1.08286e-06	1.66915e-06	2.40231e-07	0	0	0	0	0	0	0	0	0	0	0	0	8.42879e-08	0	0	0	0	2.10756e-05	1.42851e-05	2.26619e-06	0	0	0	0	0	0	0	0	0	0	0	0	0	0	0
K00226	dihydroorotate dehydrogenase (fumarate) [EC:1.3.98.1]	0.000207014	3.60185e-05	0.000230774	0.000387562	0.000399963	0.000225928	0.000310172	0.000142887	0.00020595	0.000223031	0.000350578	0.00011111	0.000256663	0.00031345	0.000366802	0.000269913	0.000178669	0.000446276	0.000391476	0.000202971	0.000335707	0.000437371	0.00023666	0.000250991	0.000428479	0.000234338	0.000283789	0.000245099	0.000341534	0.0002685	0.000176619	0.000216408	0.000381121	0.000124005	0.000449148	0.000265404	0.000213659	0.000164209	6.52661e-05	0.000258792	0.000371923	0.000472239	0.000493362	0.000209386	7.89e-05	0.000361765	0.000260679	0.000137206
K00228	coproporphyrinogen III oxidase [EC:1.3.3.3]	8.32855e-07	0	0	0	2.4146e-06	1.7486e-06	9.21568e-08	8.88395e-07	4.77515e-07	3.14204e-07	6.23229e-07	5.01657e-06	4.59851e-06	4.05826e-07	0	5.78552e-07	0	0	0	0	3.29655e-07	0	2.15985e-06	1.67897e-07	9.92128e-07	0	0	0	7.20589e-07	6.91273e-08	1.05125e-06	0	0	0	4.70358e-07	5.71333e-07	0	3.32743e-07	0	1.33412e-07	0	3.1131e-06	0	4.5264e-08	0	0	3.40988e-06	1.04737e-06
K00230	menaquinone-dependent protoporphyrinogen oxidase [EC:1.3.5.3]	8.32855e-07	0	0	0	2.4146e-06	1.7486e-06	9.21568e-08	8.88395e-07	4.77515e-07	3.14204e-07	6.23229e-07	4.92535e-06	4.59851e-06	4.05826e-07	0	5.78552e-07	0	0	0	0	1.43296e-06	0	2.15985e-06	1.67897e-07	1.60021e-06	5.1339e-06	0	0	1.28162e-05	6.91273e-08	1.05125e-06	0	0	0	4.70358e-07	5.71333e-07	0	3.32743e-07	0	1.33412e-07	0	3.1131e-06	0	4.57166e-06	0	0	5.57981e-06	4.1057e-06
K00231	protoporphyrinogen/coproporphyrinogen III oxidase [EC:1.3.3.4 1.3.3.15]	7.8328e-06	3.4693e-06	2.5479e-06	3.95843e-06	4.08427e-06	8.8999e-06	1.0232e-05	7.93762e-06	1.10783e-05	8.63163e-06	1.25736e-05	8.96597e-06	7.90361e-06	3.68625e-06	2.30006e-06	1.41898e-06	6.57153e-07	2.07825e-06	1.93582e-07	2.06946e-06	2.52424e-06	9.2933e-06	1.01753e-05	1.04286e-05	1.42418e-06	3.24508e-06	5.09574e-06	5.41521e-06	1.19669e-05	6.50391e-06	3.13379e-05	1.7396e-05	6.96552e-06	1.21257e-06	3.02793e-06	5.42052e-06	4.8841e-06	4.12601e-06	8.10565e-07	2.57929e-06	3.58274e-06	2.04031e-06	5.94549e-06	9.67921e-06	2.56486e-06	3.18945e-06	5.40267e-06	1.2359e-05
K00232	acyl-CoA oxidase [EC:1.3.3.6]	0	0	0	0	0	0	3.66043e-06	0	0	0	0	0	0	0	0	0	0	0	0	0	0	0	1.00793e-06	0	0	0	2.5298e-06	2.63087e-07	0	0	0	0	1.38823e-06	0	0	0	0	0	0	0	0	0	1.13608e-07	0	1.22136e-07	6.18849e-07	0	1.92717e-06
K00239	succinate dehydrogenase / fumarate reductase, flavoprotein subunit [EC:1.3.5.1 1.3.5.4]	0.000286601	0.000175541	0.000357465	0.000345781	0.000368436	0.000298315	0.000292005	0.000232023	0.000220557	0.000281714	0.000526952	0.000278971	0.000423978	0.000139218	0.000295958	0.000142633	0.000108838	5.24557e-05	0.000124517	0.000203285	0.000354492	0.000380734	0.000275925	0.000310939	0.000175748	0.000190393	0.00017068	0.0002142	0.000348195	0.000283779	0.000266044	0.000291998	0.000242973	0.000106917	0.000147536	0.000148448	0.000191308	0.000222364	0.000144917	0.000135902	0.00029538	0.000316555	0.00036543	0.000409661	0.000550553	0.000165967	0.000253143	0.000216269
K00240	succinate dehydrogenase / fumarate reductase, iron-sulfur subunit [EC:1.3.5.1 1.3.5.4]	0.000262072	0.000147164	0.0003238	0.000308101	0.000326283	0.000281098	0.000248339	0.000194343	0.000193516	0.000259944	0.000504009	0.000215694	0.000296127	0.000106887	0.000263872	0.000120649	3.73302e-05	3.71024e-05	4.06963e-05	0.000114984	0.000340316	0.000341616	0.000241655	0.00028688	0.000164307	0.000185565	0.000140268	0.000207448	0.000323026	0.000253805	0.000250276	0.000222621	0.000200983	6.7021e-05	0.000138452	0.000118489	0.000122599	0.000189455	0.000106867	0.000109451	0.000265202	0.000281707	0.000318188	0.000349605	0.000276377	0.000149258	0.000226174	0.000182983
K00241	succinate dehydrogenase / fumarate reductase, cytochrome b subunit	0.000261863	0.000146888	0.000317751	0.00030425	0.00032568	0.000278453	0.000231005	0.000191552	0.000189797	0.000258126	0.000501458	0.000215067	0.000292452	0.000106515	0.000253191	0.000119902	3.49156e-05	3.5878e-05	4.06963e-05	9.58518e-05	0.000338176	0.000338581	0.000233844	0.000283688	0.000160458	0.000184349	0.000126842	0.000200575	0.000319217	0.000249829	0.00024995	0.000211973	0.000159523	6.39039e-05	0.000135505	0.000114641	0.000121896	0.000187725	9.94009e-05	0.000109282	0.000264823	0.000276208	0.000317374	0.000347342	0.000256082	0.000144426	0.000218336	0.000160967
K00242	succinate dehydrogenase / fumarate reductase, membrane anchor subunit	3.54955e-06	0	1.29861e-06	2.35366e-07	4.6237e-06	3.99039e-06	4.18323e-06	8.88395e-07	1.37745e-06	3.14204e-07	2.64872e-06	5.01657e-06	5.07897e-06	7.10195e-07	0	5.78552e-07	0	0	0	0	3.29655e-07	3.13379e-06	4.03172e-06	9.68436e-07	9.92128e-07	0	3.16225e-06	9.20805e-07	1.64706e-06	5.8944e-07	1.05125e-06	0	1.38823e-06	0	4.70358e-07	5.71333e-07	0	3.32743e-07	0	1.33412e-07	1.06155e-06	3.39874e-06	1.13608e-07	4.5264e-08	5.49613e-07	8.09265e-07	6.44335e-06	3.81244e-06
K00243	uncharacterized	protein	0.000607015	0.00068947	0.000737801	0.000700851	0.00056631	0.000666117	0.000619462	0.000618915	0.000557524	0.000533012	0.000495238	0.000615064	0.000756812	0.000714794	0.000609089	0.000616893	0.000728016	0.00071578	0.000606833	0.000622046	0.000691343	0.000589771	0.000625329	0.000749441	0.000659359	0.000720523	0.000645967	0.000678319	0.000728256	0.00057409	0.000525859	0.000663622	0.000594642	0.000745333	0.000694903	0.000540818	0.000612743	0.000590149	0.000637515	0.000577226	0.000726523	0.000709152	0.000594039	0.000433166	0.000746324	0.000644607	0.000631388
K00244	fumarate reductase flavoprotein subunit [EC:1.3.5.4]	0.000215095	0.000240075	0.00024856	0.000500452	0.000621914	0.000340124	0.000406772	0.000261265	0.00036866	0.000340678	9.70091e-05	0.000178636	0.000258461	0.000598897	0.000379107	0.000445108	0.000432727	0.000514729	0.000691864	0.000362298	0.000206945	0.000449158	0.000277901	0.000371981	0.000657077	0.000344776	0.00063142	0.00032557	0.000428802	0.000356627	0.000146923	0.000364689	0.000695783	0.000232893	0.000590549	0.000461237	0.000330629	0.0001973	0.000219601	0.000466745	0.000332607	0.000678752	0.000535454	0.000116383	6.76024e-05	0.000686375	0.000574122	0.000290709
K00245	fumarate reductase iron-sulfur subunit [EC:1.3.5.4]	1.84418e-06	1.8503e-06	1.26573e-06	0	5.831e-06	2.95916e-06	9.21568e-08	2.81969e-06	4.77515e-07	3.14204e-07	1.59702e-06	6.56714e-06	4.59851e-06	4.05826e-07	8.19396e-07	1.37026e-06	3.20935e-06	4.67203e-07	6.51141e-07	1.07041e-06	1.14878e-06	0	3.11978e-06	1.67897e-07	1.48819e-06	0	0	0	7.20589e-07	6.91273e-08	1.47176e-06	2.09926e-06	2.4763e-06	0	4.70358e-07	5.71333e-07	1.28311e-06	1.24779e-06	1.16908e-06	1.33412e-07	2.52119e-06	3.766e-06	5.49106e-07	4.5264e-08	0	1.35671e-06	3.40988e-06	1.82243e-06
K00246	fumarate reductase subunit C	8.32855e-07	0	0	0	2.4146e-06	1.7486e-06	9.21568e-08	8.88395e-07	4.77515e-07	3.14204e-07	6.23229e-07	4.92535e-06	4.59851e-06	4.05826e-07	0	5.78552e-07	0	0	0	0	3.29655e-07	0	2.15985e-06	1.67897e-07	9.92128e-07	0	0	0	7.20589e-07	6.91273e-08	1.05125e-06	0	0	0	4.70358e-07	5.71333e-07	0	3.32743e-07	0	1.33412e-07	0	3.1131e-06	0	4.5264e-08	0	0	3.40988e-06	1.04737e-06
K00247	fumarate reductase subunit D	8.32855e-07	0	0	0	2.4146e-06	1.7486e-06	9.21568e-08	8.88395e-07	4.77515e-07	3.14204e-07	6.23229e-07	4.92535e-06	4.59851e-06	4.05826e-07	0	5.78552e-07	0	0	0	0	3.29655e-07	0	2.15985e-06	1.67897e-07	9.92128e-07	0	0	0	7.20589e-07	6.91273e-08	1.05125e-06	0	0	0	4.70358e-07	5.71333e-07	0	3.32743e-07	0	1.33412e-07	0	3.1131e-06	0	4.5264e-08	0	0	3.40988e-06	1.04737e-06
K00248	butyryl-CoA dehydrogenase [EC:1.3.8.1]	0.000260198	0.000398706	0.000230166	5.40768e-05	8.58981e-05	0.000203992	0.000142025	0.000246974	0.000334851	0.000216913	0.000152071	0.000230188	0.000225313	0.000250051	0.000160875	0.000194447	0.000294303	0.000200785	0.000269212	0.000303607	0.000243082	0.000129134	0.00026223	0.000246241	0.00015346	0.000204465	0.000243484	0.000180587	0.000123452	0.000200513	0.000261058	0.000336931	0.00024162	0.00032381	0.000108469	0.00021949	0.000380581	0.000255569	0.000328702	0.0002332	0.000160051	7.08088e-05	5.40017e-05	0.000155211	0.000202828	0.000113444	0.000207914	0.000231229
K00249	acyl-CoA dehydrogenase [EC:1.3.8.7]	0	0	0	0	0	0	0	0	0	0	0	0	0	0	0	0	1.98674e-07	7.24971e-07	0	5.42342e-07	0	0	7.1995e-07	0	0	0	2.8912e-07	0	3.60295e-07	0	0	0	0	0	0	0	4.55298e-07	0	0	0	0	0	0	0	0	0	0	0
K00252	glutaryl-CoA dehydrogenase [EC:1.3.8.6]	0	1.4233e-07	5.26018e-07	0	0	2.5108e-06	9.06926e-06	6.18014e-07	2.44634e-06	1.40943e-05	1.40149e-05	4.4994e-05	5.14095e-06	3.14515e-06	0	0	0	0	0	6.85063e-07	0	5.04288e-07	1.87187e-06	0	0	8.42879e-08	2.92734e-06	9.20805e-07	9.26472e-07	0	0.00012043	7.90333e-05	1.12615e-05	0	0	0	0	0	0	0	6.44514e-07	0	1.13608e-07	0	1.22136e-07	6.18849e-07	2.5242e-06	1.92717e-06
K00253	isovaleryl-CoA dehydrogenase [EC:1.3.8.4]	0	0	5.26018e-07	0	0	2.24179e-06	0	0	4.40783e-07	0	2.02549e-06	9.12103e-08	4.80463e-07	3.04369e-07	0	0	0	0	0	0	0	5.04288e-07	8.6394e-07	0	0	0	3.9754e-07	6.57718e-07	9.26472e-07	0	0	0	0	0	0	0	0	0	0	0	6.44514e-07	0	0	0	0	0	2.5242e-06	0
K00254	dihydroorotate dehydrogenase [EC:1.3.5.2]	3.86286e-05	3.18582e-05	3.10121e-06	9.78566e-06	4.7076e-05	0.000105005	1.41741e-05	1.0648e-05	5.631e-05	0.000106096	0.000103456	0.000171156	1.88524e-05	4.06942e-06	1.37334e-05	1.99957e-05	1.38552e-06	7.12083e-06	0	0	7.38415e-06	1.70619e-05	2.23343e-05	4.82868e-05	7.83045e-06	1.39458e-05	2.32741e-05	5.45161e-06	6.64316e-05	2.26656e-05	5.08105e-05	0.000134116	8.4394e-05	0	1.52475e-05	2.39246e-06	0	7.32034e-07	2.37455e-05	4.49597e-05	5.72605e-05	2.10678e-05	4.09747e-05	2.30276e-05	4.03591e-05	3.67344e-05	7.25964e-05	2.74692e-05
K00255	long-chain-acyl-CoA dehydrogenase [EC:1.3.8.8]	0	0	0	0	0	0	0	0	0	0	0	9.12103e-08	0	0	0	0	0	0	0	0	0	0	0	0	0	0	0	0	0	0	0	0	0	0	0	0	0	0	0	0	0	0	0	0	0	0	0	0
K00257	acyl-ACP dehydrogenase [EC:1.3.99.-]	0.000230334	0.000116631	0.000314929	0.000294571	0.000276549	0.000176877	0.000220212	0.000181252	0.000134387	0.000150369	0.000400553	4.309e-05	0.000272999	0.000102784	0.000240895	0.000101642	3.44929e-05	2.97676e-05	3.75638e-05	9.20554e-05	0.000330792	0.00032224	0.000216117	0.00023274	0.000152628	0.000170327	0.000108845	0.00019817	0.000254999	0.000239744	0.000196383	8.00323e-05	7.79527e-05	6.39039e-05	0.000120581	0.000114802	0.000122185	0.000190587	7.57489e-05	7.49596e-05	0.000209837	0.000255161	0.000278028	0.000326335	0.000215418	0.000116284	0.000150721	0.000136871
K00259	alanine dehydrogenase [EC:1.4.1.1]	0.00012361	0.000108536	0.000154082	0.000202736	0.000170872	0.000122581	0.000145668	0.000115868	0.000119346	0.000130621	0.000118445	6.19363e-05	0.000178612	7.13323e-05	5.33542e-05	8.64205e-05	0.000150946	7.13613e-05	4.31601e-05	7.064e-05	0.000144918	0.000120759	0.000192551	0.00014163	5.64073e-05	0.000134428	0.000109043	0.000214372	0.000150462	0.000185631	0.000178619	0.000110434	5.33116e-05	4.45687e-05	5.61122e-05	7.89974e-05	0.000134292	0.000104964	7.58892e-05	6.01954e-05	0.000102355	0.000147943	0.000109168	0.000235908	0.000195815	0.000118141	0.000107898	0.000144558
K00260	glutamate dehydrogenase [EC:1.4.1.2]	2.13171e-06	2.58863e-06	1.64381e-07	3.55189e-06	2.31185e-06	5.86228e-06	1.01717e-05	2.70381e-06	4.92024e-06	1.98173e-05	1.873e-05	3.53417e-05	6.07785e-06	3.80462e-06	5.10326e-06	3.79865e-06	5.24347e-05	5.82554e-05	4.14882e-05	3.56804e-05	1.06737e-05	0	2.22944e-05	8.11357e-06	8.00104e-07	8.08972e-06	2.15123e-05	9.7123e-06	4.01214e-05	1.62969e-05	5.94148e-05	8.51616e-05	2.62562e-05	1.21521e-05	1.22734e-06	5.56157e-06	4.72889e-05	4.0761e-06	9.74237e-07	2.38095e-05	5.40255e-07	6.33515e-06	0	1.35388e-06	0	1.65304e-05	3.45417e-06	7.25829e-06
K00261	glutamate dehydrogenase (NAD(P)+) [EC:1.4.1.3]	8.32855e-07	0	0	2.43925e-06	2.4146e-06	1.7486e-06	9.21568e-08	8.88395e-07	4.77515e-07	3.14204e-07	0	0	4.16609e-06	4.05826e-07	0	1.37026e-05	0	0	0	0	2.70344e-06	0	2.15985e-06	4.66822e-06	1.60021e-06	5.1339e-06	4.3368e-07	0	2.1e-05	2.74502e-06	1.05125e-06	0	0	2.37243e-07	1.41107e-06	5.71333e-07	0	3.32743e-07	8.10565e-07	1.33412e-07	3.79126e-07	3.1131e-06	0	4.57166e-06	0	0	5.57981e-06	4.1057e-06
K00262	glutamate dehydrogenase (NADP+) [EC:1.4.1.4]	0.000868073	0.000866264	0.00102818	0.000850035	0.000849789	0.000769326	0.000804591	0.000887204	0.000725455	0.000684571	0.00104802	0.000728744	0.000938122	0.000624059	0.000805855	0.000657632	0.000422447	0.000719739	0.000410738	0.000657485	0.000954372	0.000816421	0.000775534	0.000895095	0.00062107	0.00079493	0.000594349	0.000677387	0.000836278	0.000841056	0.000748003	0.000605492	0.000532616	0.000685084	0.000725061	0.0006822	0.000622475	0.00083603	0.000798316	0.000597343	0.000718965	0.00078402	0.000804213	0.00102148	0.00100589	0.000553819	0.000660409	0.000819063
K00263	leucine dehydrogenase [EC:1.4.1.9]	0	1.4233e-07	0	0	0	0	0	0	0	3.14204e-07	0	0	0	0	0	0	1.98674e-07	7.24971e-07	0	1.2274e-06	0	0	7.1995e-07	0	0	0	2.8912e-07	0	3.60295e-07	0	0	0	0	0	0	0	4.55298e-07	0	0	0	1.5165e-07	0	0	0	0	0	0	0
K00265	glutamate synthase (NADPH) large chain [EC:1.4.1.13]	0.000251423	0.000143285	0.000318309	0.00030532	0.000326797	0.00027565	0.000246896	0.000191176	0.000189035	0.000258598	0.000495226	0.000210176	0.000290386	0.000104317	0.000251567	0.000121897	3.3479e-05	3.9519e-05	3.75638e-05	9.28332e-05	0.000339179	0.000335745	0.000239591	0.000283505	0.00016149	0.000184991	0.000134703	0.000207009	0.000321945	0.000236877	0.000244473	0.000205271	0.000156784	6.41214e-05	0.000137011	0.000114597	0.000122434	0.000187526	9.88553e-05	9.72126e-05	0.000260349	0.000277034	0.000314856	0.000348918	0.000255695	0.000140475	0.00022055	0.000167314
K00266	glutamate synthase (NADPH) small chain [EC:1.4.1.13]	0.00121549	0.00124694	0.00130872	0.00103249	0.00092966	0.000959071	0.00104104	0.0012083	0.00107624	0.000942098	0.00109899	0.000729106	0.00108055	0.000816939	0.00101702	0.000887631	0.000792822	0.000536273	0.000553584	0.00102186	0.00115822	0.000971628	0.00111365	0.00100256	0.000809441	0.00113462	0.000767929	0.0010647	0.000891755	0.00112189	0.00100785	0.000718493	0.000667924	0.00113129	0.000701774	0.00091325	0.00094257	0.00125546	0.00137083	0.000852432	0.000934416	0.000848024	0.000901235	0.00129987	0.00139577	0.000765449	0.000745265	0.00119339
K00274	monoamine oxidase [EC:1.4.3.4]	0	1.54073e-07	4.2739e-07	0	0	0	2.82069e-06	0	8.54641e-06	1.79545e-07	4.21848e-07	3.49791e-07	0	3.38188e-07	0	0	1.98674e-07	1.01045e-06	0	7.23027e-07	0	0	1.96786e-06	0	0	0	1.31911e-06	1.90738e-06	3.60295e-07	0	0	0	1.24453e-06	0	0	1.37477e-06	4.55298e-07	3.26654e-06	9.76731e-07	0	0	4.48867e-07	1.89347e-07	2.02071e-06	0	6.10757e-07	2.80319e-07	1.61295e-06
K00275	pyridoxamine 5'-phosphate oxidase [EC:1.4.3.5]	0.000152611	5.43642e-05	0.000195295	0.000128196	0.000165828	0.000176025	0.000112338	9.34619e-05	8.86891e-05	0.000157558	0.000406423	0.000188304	0.000134764	4.335e-05	0.000209742	6.19864e-05	1.85785e-05	2.51162e-05	1.45187e-05	5.90153e-05	0.000232125	0.000225477	0.000113672	0.000181263	0.000115428	0.000106107	4.92046e-05	0.000109349	0.00022509	0.00012671	0.000141786	0.000149266	0.000123883	3.1316e-05	0.000103939	5.50622e-05	5.01241e-05	9.37669e-05	4.54125e-05	6.48292e-05	0.000169937	0.000168296	0.000214511	0.000173005	0.000106761	5.71565e-05	0.000123789	5.40515e-05
K00276	primary-amine oxidase [EC:1.4.3.21]	8.32855e-07	0	0	0	2.4146e-06	1.7486e-06	9.21568e-08	8.88395e-07	4.77515e-07	3.14204e-07	0	0	4.16609e-06	4.05826e-07	0	5.78552e-07	0	0	0	0	3.29655e-07	0	2.15985e-06	1.67897e-07	9.92128e-07	0	0	0	7.20589e-07	6.91273e-08	1.05125e-06	0	0	0	4.70358e-07	5.71333e-07	0	3.32743e-07	0	1.33412e-07	0	3.1131e-06	0	4.5264e-08	0	0	3.40988e-06	1.04737e-06
K00278	L-aspartate oxidase [EC:1.4.3.16]	0.000622876	0.000759985	0.000556431	0.000515622	0.000548003	0.000606012	0.000479501	0.000667848	0.000603416	0.000621997	0.000701727	0.000674728	0.00062743	0.000381603	0.00050385	0.000427639	0.000436737	0.000275388	0.000307057	0.000560096	0.000575803	0.000527689	0.000586115	0.000615869	0.000405546	0.00052928	0.000433969	0.000503147	0.000544067	0.000553463	0.000640819	0.000566934	0.000411975	0.000581475	0.000360828	0.000470823	0.000543212	0.000634016	0.000682263	0.000465186	0.000584138	0.000460458	0.000474589	0.00070521	0.000750266	0.000393462	0.000522317	0.00058971
K00281	glycine dehydrogenase [EC:1.4.4.2]	0.000162645	5.61077e-05	0.000194769	0.000128581	0.000166239	0.000174927	0.000113221	9.53738e-05	8.83953e-05	0.000157558	0.000410124	0.000189216	0.000134284	4.44153e-05	0.00021128	6.3722e-05	1.98011e-05	2.52451e-05	1.45187e-05	5.90153e-05	0.00023485	0.000229907	0.000115064	0.000181458	0.000116533	0.000107946	4.98551e-05	0.000108691	0.00022684	0.000142115	0.000143426	0.000152352	0.000125347	3.1316e-05	0.000105203	5.79903e-05	5.01241e-05	9.47652e-05	4.56931e-05	7.60002e-05	0.000171283	0.000168296	0.000219832	0.000174723	0.000108002	6.56299e-05	0.000122704	5.47847e-05
K00282	glycine dehydrogenase subunit 1 [EC:1.4.4.2]	0.00015266	0.00030803	0.000251938	0.000185704	0.000199359	0.000122603	0.000152408	0.000235888	0.00014016	0.000117571	0.000115913	9.23208e-05	0.000300962	0.000167056	9.60778e-05	0.000104051	9.8955e-05	3.30265e-05	0.000132718	0.000160034	0.000154363	0.000141453	0.000158185	0.000280773	5.77035e-05	0.000120769	0.000239039	0.000103722	0.000170407	0.000157571	0.000145883	0.000145261	8.63541e-05	7.79144e-05	4.75282e-05	9.76015e-05	0.000147579	0.000131824	0.000134718	7.51908e-05	0.000123794	0.000146147	0.000105589	0.00024486	0.000278013	0.000113285	0.000237164	0.000181091
K00283	glycine dehydrogenase subunit 2 [EC:1.4.4.2]	0.00015266	0.00030803	0.000251938	0.000185704	0.000199359	0.000122603	0.000152408	0.000235888	0.00014016	0.000117571	0.000115913	9.23208e-05	0.000300962	0.000167056	9.60778e-05	0.000104051	9.8955e-05	3.30265e-05	0.000132718	0.000160034	0.000154363	0.000141453	0.000158185	0.000280773	5.77035e-05	0.000120769	0.000239039	0.000103722	0.000170407	0.000157571	0.000145883	0.000145261	8.63541e-05	7.79144e-05	4.75282e-05	9.76015e-05	0.000147579	0.000131824	0.000134718	7.51908e-05	0.000123794	0.000146147	0.000105589	0.00024486	0.000285341	0.000113285	0.000237164	0.000181091
K00284	glutamate synthase (ferredoxin) [EC:1.4.7.1]	0.000274921	0.000370462	0.000255086	0.000178593	0.000145826	0.000221534	0.000255111	0.000308148	0.000314976	0.000231961	8.42267e-05	0.000290638	0.000172702	0.000234319	0.000204787	0.000266956	0.000161334	0.000128763	0.000114231	0.000290512	0.000146077	9.8174e-05	0.000208138	0.000132565	0.000208795	0.000311137	0.000139591	0.000204638	0.000121059	0.000257716	0.000224149	0.000143601	0.000175004	0.00038573	0.000200211	0.000281721	0.000149069	0.000346782	0.000466922	0.000250357	0.000171258	8.95695e-05	0.000148429	0.000234322	0.000396332	0.000178395	0.000111802	0.000370582
K00285	D-amino-acid dehydrogenase [EC:1.4.5.1]	1.66571e-06	0	1.05204e-06	0	4.8292e-06	7.98077e-06	1.84314e-07	1.77679e-06	1.83659e-06	6.28408e-07	4.67422e-06	5.19899e-06	9.72552e-06	1.42039e-06	0	1.1571e-06	1.98674e-07	7.24971e-07	0	2.85443e-07	6.59311e-07	1.00858e-06	6.76753e-06	3.35794e-07	1.98426e-06	0	1.0842e-06	1.31544e-06	3.65442e-06	1.38255e-07	2.10251e-06	0	0	0	9.40715e-07	1.14267e-06	4.55298e-07	6.65486e-07	0	2.66823e-07	1.28903e-06	6.2262e-06	0	9.05279e-08	0	0	1.18682e-05	2.09475e-06
K00286	pyrroline-5-carboxylate reductase [EC:1.5.1.2]	0.00074828	0.00078679	0.000759606	0.000738814	0.000621815	0.000741315	0.000800504	0.000728973	0.00070813	0.000745113	0.000795927	0.000842259	0.000796553	0.000799722	0.000757345	0.000813364	0.000881736	0.000894295	0.000862612	0.000795154	0.000802123	0.000735285	0.000793689	0.000774321	0.000704937	0.000721445	0.000718345	0.000792773	0.000711269	0.000765788	0.000801482	0.000818018	0.000746812	0.000760969	0.000784767	0.000764081	0.000841452	0.000763484	0.000795121	0.000803998	0.000855166	0.00063115	0.00075717	0.000774925	0.00084256	0.000728192	0.000716672	0.000719867
K00287	dihydrofolate reductase [EC:1.5.1.3]	0.000762935	0.00071575	0.00072359	0.000817768	0.000801189	0.000787967	0.000791482	0.000701472	0.000794652	0.000826883	0.000744472	0.00072437	0.000679272	0.000789018	0.000756727	0.000746797	0.000721559	0.000712988	0.000702167	0.00064855	0.000715112	0.000805795	0.000762443	0.000739833	0.000820568	0.000749969	0.00077953	0.000801345	0.000755585	0.000769541	0.00075799	0.000715066	0.000830453	0.000681334	0.00079646	0.000740984	0.000640231	0.000715503	0.000671135	0.000752554	0.000765617	0.000783683	0.000823631	0.00069737	0.000700312	0.000816473	0.000792332	0.000738719
K00290	saccharopine dehydrogenase (NAD+, L-lysine forming) [EC:1.5.1.7]	0.000519573	0.000484863	0.00051504	0.000439778	0.00047726	0.000516239	0.000390009	0.000523967	0.000365446	0.000449252	0.000639485	0.000362694	0.000399177	0.000288122	0.000407003	0.000321406	0.000230548	0.000228104	0.000143066	0.000293316	0.000532698	0.000445454	0.000483426	0.000552956	0.000328384	0.00045094	0.000366378	0.00038592	0.00044182	0.000377942	0.00043004	0.000369667	0.000294545	0.000421139	0.000282345	0.00031725	0.000372302	0.000487482	0.000394514	0.000255042	0.0004741	0.000414305	0.000427517	0.000566726	0.000553097	0.000256057	0.000453721	0.00050327
K00294	1-pyrroline-5-carboxylate dehydrogenase [EC:1.2.1.88]	7.8328e-06	3.61163e-06	2.64653e-06	3.95843e-06	4.08427e-06	8.8999e-06	6.57156e-06	7.93762e-06	1.10783e-05	8.6855e-06	1.33137e-05	8.96597e-06	8.04775e-06	3.68625e-06	2.30006e-06	7.73433e-06	4.58479e-07	1.35328e-06	1.93582e-07	2.21218e-06	2.62454e-06	9.2933e-06	8.44741e-06	1.04286e-05	1.42418e-06	3.24508e-06	2.27682e-06	5.15213e-06	1.16066e-05	6.50391e-06	3.13379e-05	1.7396e-05	5.57729e-06	1.21257e-06	3.49829e-06	5.32053e-06	4.42881e-06	4.12601e-06	8.10565e-07	2.57929e-06	3.58274e-06	2.04031e-06	5.83188e-06	9.67921e-06	2.44272e-06	2.57061e-06	5.40267e-06	1.04318e-05
K00297	methylenetetrahydrofolate reductase (NADH) [EC:1.5.1.54]	0.000674018	0.000660098	0.000680506	0.000549836	0.000562966	0.000604723	0.000514706	0.000673236	0.000436996	0.000595839	0.000704924	0.000661157	0.000641172	0.00043157	0.000515091	0.000409879	0.000390873	0.000269923	0.000338444	0.000564701	0.000611234	0.000530454	0.00060175	0.000637537	0.000395585	0.000553379	0.000449699	0.000506183	0.000526953	0.000460364	0.000684917	0.000543956	0.00041619	0.00057679	0.0003649	0.000452129	0.000540169	0.000635178	0.000554554	0.000408904	0.000588963	0.000477658	0.000518877	0.000727095	0.000918855	0.000403367	0.000524479	0.000598518
K00299	FMN reductase [EC:1.5.1.38]	8.32855e-07	0	0	0	2.4146e-06	2.28663e-06	1.02639e-05	2.12442e-06	3.31322e-06	1.91664e-05	1.30722e-05	4.6572e-05	9.06681e-06	3.24661e-06	0	5.78552e-07	0	0	0	2.56899e-07	3.29655e-07	0	3.16778e-06	1.67897e-07	9.92128e-07	1.68576e-07	2.5298e-06	2.63087e-07	7.20589e-07	6.91273e-08	0.000142924	9.42289e-05	1.35558e-05	0	4.70358e-07	5.71333e-07	0	3.32743e-07	0	1.33412e-07	0	3.1131e-06	1.13608e-07	4.5264e-08	1.22136e-07	6.18849e-07	3.40988e-06	2.97454e-06
K00302	sarcosine oxidase, subunit alpha [EC:1.5.3.1]	0	0	0	0	0	0	0	0	0	0	0	0	0	0	0	0	3.97348e-07	1.44994e-06	0	5.70886e-07	0	0	1.4399e-06	0	0	0	5.7824e-07	0	7.20589e-07	0	0	0	0	0	0	0	9.10595e-07	0	0	0	0	0	0	0	0	0	0	0
K00303	sarcosine oxidase, subunit beta [EC:1.5.3.1]	0	0	5.26018e-07	0	0	4.93194e-06	0	0	4.40783e-07	0	2.02549e-06	0	4.80463e-07	3.04369e-07	0	0	1.98674e-07	7.24971e-07	0	2.85443e-07	0	5.04288e-07	1.58389e-06	0	0	0	6.8666e-07	6.57718e-07	1.28677e-06	0	0	0	0	0	0	0	4.55298e-07	0	0	0	6.44514e-07	0	0	0	0	0	5.75694e-06	2.84885e-06
K00311	electron-transferring-flavoprotein dehydrogenase [EC:1.5.5.1]	0	0	5.26018e-07	0	0	2.24179e-06	0	0	4.40783e-07	0	2.02549e-06	9.12103e-08	4.80463e-07	3.04369e-07	0	0	0	0	0	0	0	5.04288e-07	8.6394e-07	0	0	0	3.9754e-07	6.57718e-07	9.26472e-07	0	0	0	0	0	0	0	0	0	0	0	6.44514e-07	0	0	0	0	0	2.5242e-06	0
K00313	electron transfer flavoprotein-quinone oxidoreductase [EC:1.5.5.-]	1.50707e-06	3.32697e-06	2.92598e-06	7.27495e-07	3.80171e-06	3.45236e-06	1.33498e-06	1.93129e-06	1.23052e-06	1.03238e-06	1.67493e-06	1.64178e-06	4.80463e-07	5.41101e-07	1.9838e-06	2.37511e-06	7.97753e-06	1.04718e-06	1.63665e-06	1.7412e-06	2.57439e-06	1.13465e-06	2.42383e-06	0	1.71222e-06	4.78908e-07	3.9754e-07	6.57718e-07	9.26472e-07	1.04063e-06	4.20502e-07	2.88332e-06	4.44608e-06	7.64448e-07	6.17345e-07	1.16052e-06	3.39404e-06	2.61203e-06	2.86815e-06	1.44085e-06	3.65857e-06	1.67305e-06	2.23429e-06	1.51553e-06	2.30023e-06	3.40367e-06	3.09989e-06	1.38253e-06
K00318	proline dehydrogenase [EC:1.5.5.2]	7.8328e-06	3.4693e-06	2.64653e-06	3.95843e-06	4.08427e-06	8.8999e-06	6.57156e-06	7.93762e-06	1.10783e-05	8.37129e-06	1.33137e-05	8.96597e-06	8.04775e-06	3.68625e-06	2.30006e-06	1.2789e-06	4.58479e-07	1.35328e-06	1.93582e-07	1.78402e-06	2.62454e-06	9.2933e-06	8.44741e-06	1.04286e-05	1.42418e-06	3.24508e-06	2.27682e-06	5.15213e-06	1.16066e-05	6.50391e-06	3.13379e-05	1.7396e-05	5.57729e-06	1.21257e-06	3.02793e-06	5.32053e-06	4.42881e-06	4.12601e-06	8.10565e-07	2.57929e-06	3.58274e-06	2.04031e-06	5.83188e-06	9.67921e-06	2.44272e-06	2.57061e-06	5.40267e-06	1.04318e-05
K00322	NAD(P) transhydrogenase [EC:1.6.1.1]	8.32855e-07	0	0	0	2.4146e-06	1.7486e-06	9.21568e-08	8.88395e-07	4.77515e-07	3.14204e-07	6.23229e-07	5.01657e-06	4.59851e-06	4.05826e-07	0	5.78552e-07	0	0	0	0	3.29655e-07	0	2.15985e-06	1.67897e-07	9.92128e-07	0	0	0	7.20589e-07	6.91273e-08	1.05125e-06	0	0	0	4.70358e-07	5.71333e-07	0	3.32743e-07	0	1.33412e-07	0	3.1131e-06	0	4.5264e-08	0	0	3.40988e-06	1.04737e-06
K00324	H+-translocating NAD(P) transhydrogenase subunit alpha [EC:1.6.1.2 7.1.1.1]	8.30872e-06	6.49382e-06	2.16983e-06	5.00687e-06	8.81072e-06	1.15228e-05	7.91145e-05	1.60297e-06	7.5484e-06	6.95737e-06	6.27124e-06	6.36192e-06	1.62257e-05	1.75858e-06	2.21381e-06	7.67343e-06	4.89044e-07	4.12428e-06	7.7433e-07	2.09801e-06	9.35673e-06	1.50026e-05	3.80853e-05	6.55057e-06	1.92185e-05	1.39841e-06	1.91903e-05	2.83038e-05	1.01912e-05	1.6236e-05	1.70303e-06	2.88332e-06	1.45201e-05	4.34945e-07	1.60657e-05	1.06232e-05	6.20861e-06	7.32034e-07	1.09115e-06	1.3608e-06	1.89563e-05	5.05139e-06	1.62838e-06	7.19859e-06	3.50124e-06	9.66357e-06	1.5278e-05	4.16854e-05
K00325	H+-translocating NAD(P) transhydrogenase subunit beta [EC:1.6.1.2 7.1.1.1]	4.57079e-06	3.24691e-06	1.08491e-06	2.50344e-06	5.61266e-06	6.6357e-06	3.96033e-05	1.24568e-06	4.01296e-06	3.63579e-06	3.44724e-06	5.64364e-06	1.04121e-05	1.0822e-06	1.1069e-06	4.12599e-06	2.44522e-07	2.06214e-06	3.87165e-07	1.049e-06	4.84319e-06	7.50128e-06	2.01226e-05	3.35923e-06	1.01053e-05	6.99206e-07	9.59516e-06	1.41519e-05	5.45589e-06	8.15256e-06	1.37714e-06	1.44166e-06	7.26005e-06	2.17472e-07	8.26801e-06	5.59727e-06	3.1043e-06	5.32388e-07	5.45573e-07	7.47105e-07	9.47815e-06	4.08225e-06	8.14192e-07	3.62193e-06	1.75062e-06	4.83179e-06	9.34396e-06	2.13664e-05
K00330	NADH-quinone oxidoreductase subunit A [EC:7.1.1.2]	0.000256747	0.000143419	0.000315877	0.000302966	0.000324061	0.000269553	0.000221204	0.000183615	0.000179472	0.000248408	0.000488884	0.000205691	0.000284548	0.000102288	0.000250891	0.000118837	3.41973e-05	3.52497e-05	3.77926e-05	9.12133e-05	0.000336822	0.000331918	0.000225108	0.0002722	0.000159034	0.000181027	0.000122993	0.000195159	0.000307971	0.000246521	0.000218612	0.000194577	0.000152558	6.29286e-05	0.000132477	0.000109321	0.000117757	0.000183599	9.94009e-05	0.000106703	0.000261884	0.000274453	0.000310974	0.000337663	0.000253945	0.000141427	0.000213442	0.000149446
K00331	NADH-quinone oxidoreductase subunit B [EC:7.1.1.2]	0.000256747	0.000143419	0.000315877	0.000302966	0.000323805	0.000269553	0.000221204	0.000183615	0.000179178	0.000248408	0.000488884	0.000205691	0.000284548	0.000102288	0.000250891	0.000118837	3.41973e-05	3.52497e-05	3.77926e-05	9.12133e-05	0.000336822	0.000331918	0.000225108	0.0002722	0.000159034	0.000181027	0.000122993	0.000195159	0.000307971	0.000246521	0.000218612	0.000194577	0.000152558	6.29286e-05	0.000132477	0.000109321	0.000117757	0.000183599	9.94009e-05	0.000106703	0.000261884	0.000274453	0.000310974	0.000337663	0.000253945	0.000141427	0.000213442	0.000149446
K00332	NADH-quinone oxidoreductase subunit C [EC:7.1.1.2]	3.06967e-05	3.01146e-05	3.8738e-06	1.21179e-05	4.67164e-05	0.00010431	1.07014e-05	9.41197e-06	5.69161e-05	0.000105782	0.000104332	0.000166824	1.58154e-05	3.39304e-06	1.22958e-05	1.78946e-05	3.61587e-07	7.8458e-06	4.22362e-07	2.85443e-07	8.32497e-06	1.735e-05	1.99824e-05	4.89194e-05	6.83833e-06	1.39458e-05	2.08347e-05	5.627e-06	6.60713e-05	1.26919e-05	5.06003e-05	0.000131031	8.15425e-05	2.37243e-07	1.44538e-05	6.42749e-07	4.55298e-07	0	2.44626e-05	3.4189e-05	5.63506e-05	1.83832e-05	3.88919e-05	2.29824e-05	4.06644e-05	2.81419e-05	6.92529e-05	2.46623e-05
K00333	NADH-quinone oxidoreductase subunit D [EC:7.1.1.2]	3.06967e-05	3.01146e-05	3.8738e-06	1.21179e-05	4.69732e-05	0.00010431	1.07014e-05	9.41197e-06	5.72099e-05	0.000105782	0.000104332	0.000166824	1.58154e-05	3.39304e-06	1.22958e-05	1.78946e-05	3.61587e-07	7.8458e-06	4.22362e-07	2.85443e-07	8.32497e-06	1.735e-05	1.99824e-05	4.89194e-05	6.83833e-06	1.39458e-05	2.08347e-05	5.627e-06	6.60713e-05	1.26919e-05	5.06003e-05	0.000131031	8.15425e-05	2.37243e-07	1.44538e-05	6.42749e-07	4.55298e-07	0	2.44626e-05	3.4189e-05	5.63506e-05	1.83832e-05	3.88919e-05	2.29824e-05	4.06644e-05	2.81419e-05	6.92529e-05	2.46623e-05
K00334	NADH-quinone oxidoreductase subunit E [EC:7.1.1.2]	0.000447808	0.000335885	0.000345178	0.000298465	0.00036868	0.000466998	0.000310777	0.000444446	0.000488727	0.00047431	0.000623278	0.000682618	0.000576694	0.000262096	0.000442043	0.000380198	0.000506976	0.000311366	0.000388687	0.000557763	0.000453787	0.000391964	0.000432634	0.000312443	0.000292699	0.000381546	0.000254615	0.000477715	0.000418491	0.000421071	0.000552417	0.000558828	0.00031928	0.000475118	0.000305804	0.000378267	0.000562624	0.000457446	0.0004343	0.000433167	0.000487907	0.000352505	0.000296707	0.000558072	0.000525952	0.000232097	0.000314779	0.000448671
K00335	NADH-quinone oxidoreductase subunit F [EC:7.1.1.2]	0.000400336	0.000315466	0.0003376	0.000276897	0.000330098	0.000433259	0.000240497	0.000423481	0.000478718	0.000452865	0.000591071	0.000621579	0.000450452	0.000209609	0.00043566	0.000258123	0.00046831	0.000303073	0.000291456	0.000527375	0.000426505	0.000354971	0.000399564	0.000266877	0.000283082	0.000346241	0.000238424	0.000423431	0.000396281	0.000366234	0.000537825	0.000503413	0.000386252	0.000470004	0.000294662	0.000351218	0.000482926	0.000436553	0.00042701	0.000355325	0.000452932	0.000327369	0.000258837	0.000487327	0.000459856	0.000204089	0.00029043	0.000455458
K00336	NADH-quinone oxidoreductase subunit G [EC:7.1.1.2]	0.00048721	0.000472024	0.000499038	0.000286932	0.000369091	0.00046043	0.000265926	0.000513962	0.000488298	0.000472481	0.000599342	0.000794932	0.000489321	0.000382423	0.00046385	0.000331249	0.000471398	0.000356177	0.000333551	0.000555472	0.000505108	0.000357852	0.000451064	0.000508315	0.000298412	0.00041007	0.000371944	0.0004331	0.000451921	0.000412579	0.000596822	0.000511354	0.000374596	0.00053779	0.000307626	0.000397014	0.000519122	0.00048459	0.000462981	0.000384534	0.000425313	0.000331735	0.000259216	0.000511777	0.000433638	0.000222314	0.000408661	0.000506402
K00337	NADH-quinone oxidoreductase subunit H [EC:7.1.1.2]	0.000257065	0.000146052	0.000315877	0.000302966	0.000325757	0.000271301	0.000226329	0.000184503	0.000181162	0.000250518	0.000489352	0.000206329	0.000284404	0.000102288	0.000251207	0.000119568	4.73098e-05	3.79885e-05	3.77926e-05	9.12133e-05	0.000339029	0.000363075	0.000234803	0.0002722	0.000160154	0.000182598	0.000128234	0.000201737	0.000318007	0.000252467	0.000219747	0.000202873	0.000154884	6.29286e-05	0.000132477	0.000109321	0.000125952	0.000183599	0.000101147	0.000107058	0.000263666	0.000274453	0.00034214	0.000357587	0.000253945	0.000159279	0.000215036	0.000151457
K00338	NADH-quinone oxidoreductase subunit I [EC:7.1.1.2]	0.000256747	0.000143419	0.000315877	0.000302966	0.000323805	0.000269553	0.000221204	0.000183615	0.000179178	0.000248408	0.000488884	0.000205691	0.000284404	0.000102288	0.000250891	0.000118837	3.41973e-05	3.52497e-05	3.77926e-05	9.12133e-05	0.000336822	0.000331918	0.000225108	0.0002722	0.000159034	0.000181027	0.000122993	0.000195159	0.000307971	0.000246521	0.000218612	0.000194577	0.000152558	6.29286e-05	0.000132477	0.000109321	0.000117757	0.000183599	9.94009e-05	0.000106703	0.000261884	0.000274453	0.000310974	0.000337663	0.000253945	0.000141427	0.000213442	0.000149446
K00339	NADH-quinone oxidoreductase subunit J [EC:7.1.1.2]	0.000256747	0.000143419	0.000315877	0.000302966	0.000323805	0.000269553	0.000221204	0.000183615	0.000179178	0.000248408	0.000488884	0.000205691	0.000284404	0.000102288	0.000250891	0.000118837	3.41973e-05	3.52497e-05	3.77926e-05	9.12133e-05	0.000336822	0.000331918	0.000225108	0.0002722	0.000159034	0.000181027	0.000122993	0.000195159	0.000307971	0.000246521	0.000218612	0.000194577	0.000152558	6.29286e-05	0.000132477	0.000109321	0.000117757	0.000183599	9.94009e-05	0.000106703	0.000261884	0.000274453	0.000310974	0.000337663	0.000253945	0.000141427	0.000213442	0.000149446
K00340	NADH-quinone oxidoreductase subunit K [EC:7.1.1.2]	0.000256747	0.000143419	0.000315877	0.000302966	0.000323805	0.000269553	0.000221204	0.000183615	0.000179178	0.000248408	0.000488884	0.000205691	0.000284404	0.000102288	0.000250891	0.000118837	3.41973e-05	3.52497e-05	3.77926e-05	9.12133e-05	0.000336822	0.000331918	0.000225108	0.0002722	0.000159034	0.000181027	0.000122993	0.000195159	0.000307971	0.000246521	0.000220243	0.000194577	0.000152558	6.29286e-05	0.000132477	0.000109321	0.000117757	0.000183599	9.94009e-05	0.000106703	0.000261884	0.000274453	0.000310974	0.000337663	0.000253945	0.000141427	0.000213442	0.000149446
K00341	NADH-quinone oxidoreductase subunit L [EC:7.1.1.2]	0.000256311	0.000141284	0.000315877	0.000303009	0.000323805	0.000266302	0.000221096	0.000184793	0.000179215	0.000248408	0.000491767	0.000203091	0.000283491	0.000102508	0.000250072	0.000118654	3.41973e-05	3.50564e-05	3.77926e-05	9.12133e-05	0.000339413	0.000333899	0.000225396	0.00027088	0.000159722	0.00018256	0.000122885	0.000195159	0.000309566	0.000247803	0.000215542	0.000189519	0.000144078	6.29286e-05	0.000132918	0.000110428	0.000117757	0.000184198	9.87774e-05	0.000106062	0.00025978	0.000274453	0.00031353	0.000338693	0.000254657	0.000141427	0.000213686	0.000149509
K00342	NADH-quinone oxidoreductase subunit M [EC:7.1.1.2]	0.000256747	0.000143419	0.000315877	0.000302966	0.000324061	0.000269553	0.000221204	0.000183615	0.000179472	0.000248408	0.000488884	0.000205691	0.000284404	0.000102288	0.000250891	0.000118837	3.41973e-05	3.52497e-05	3.77926e-05	9.12133e-05	0.000336822	0.000331918	0.000225108	0.0002722	0.000159034	0.000181027	0.000122993	0.000195159	0.000307971	0.000246521	0.000218612	0.000194577	0.000152558	6.29286e-05	0.000132477	0.000109321	0.000117757	0.000183599	9.94009e-05	0.000106703	0.000261884	0.000274453	0.000310974	0.000337663	0.000253945	0.000141427	0.000213442	0.000149446
K00343	NADH-quinone oxidoreductase subunit N [EC:7.1.1.2]	0.000256747	0.000143419	0.000315877	0.000302966	0.000323805	0.000269553	0.000221204	0.000183615	0.000179178	0.000248408	0.000488884	0.000205691	0.000284548	0.000102288	0.000250891	0.000118837	3.41973e-05	3.52497e-05	3.77926e-05	9.12133e-05	0.000336822	0.000331918	0.000225108	0.0002722	0.000159034	0.000181027	0.000122993	0.000195159	0.000307971	0.000246521	0.000218612	0.000194577	0.000152558	6.29286e-05	0.000132477	0.000109321	0.000117757	0.000183599	9.94009e-05	0.000106703	0.000261884	0.000274453	0.000310974	0.000337663	0.000253945	0.000141427	0.000213442	0.000149446
K00344	NADPH:quinone reductase [EC:1.6.5.5]	8.32855e-07	0	1.57806e-06	0	2.4146e-06	8.47396e-06	3.75259e-06	8.88395e-07	1.79986e-06	3.14204e-07	6.69971e-06	5.01657e-06	6.0399e-06	1.31893e-06	0	5.78552e-07	3.97348e-07	1.44994e-06	0	8.27785e-07	3.29655e-07	1.51286e-06	7.1995e-06	1.67897e-07	9.92128e-07	0	4.30066e-06	2.23624e-06	4.22059e-06	6.91273e-08	2.6828e-06	0	1.38823e-06	0	4.70358e-07	5.71333e-07	9.10595e-07	3.32743e-07	0	1.33412e-07	1.93354e-06	3.1131e-06	1.13608e-07	4.5264e-08	1.22136e-07	6.18849e-07	1.09825e-05	2.97454e-06
K00346	Na+-transporting NADH:ubiquinone oxidoreductase subunit A [EC:7.2.1.1]	0.000233884	0.000116631	0.000314649	0.000294806	0.000281173	0.000173873	0.000215972	0.000181522	0.00013251	0.000145611	0.000396043	4.61638e-05	0.000276396	0.000102581	0.000240895	0.000102221	3.40955e-05	2.80322e-05	3.75638e-05	9.12276e-05	0.000331122	0.000323861	0.000212853	0.000233709	0.00015362	0.000170242	0.000104146	0.000194685	0.000253146	0.000240333	0.000176359	6.57472e-05	7.42983e-05	6.39039e-05	0.000121051	0.000113999	0.000121275	0.000187725	7.57489e-05	7.5093e-05	0.000208965	0.000258111	0.000277914	0.00032436	0.000215723	0.000115856	0.000149592	0.000135216
K00347	Na+-transporting NADH:ubiquinone oxidoreductase subunit B [EC:7.2.1.1]	0.000233884	0.000116631	0.000314649	0.000294806	0.000281173	0.000173873	0.000215972	0.000181522	0.00013251	0.000145611	0.000396043	4.61638e-05	0.000276396	0.000102581	0.000240895	0.000102221	3.40955e-05	2.80322e-05	3.75638e-05	9.12276e-05	0.000331122	0.000323861	0.000212853	0.000233709	0.00015362	0.000170242	0.000104146	0.000194685	0.000253146	0.000240333	0.000176359	6.57472e-05	7.42983e-05	6.39039e-05	0.000121051	0.000113999	0.000121275	0.000187725	7.57489e-05	7.5093e-05	0.000208965	0.000258111	0.000277914	0.00032436	0.000215723	0.000115856	0.000149592	0.000135216
K00348	Na+-transporting NADH:ubiquinone oxidoreductase subunit C [EC:7.2.1.1]	0.000233884	0.000116631	0.000314649	0.000294806	0.000281173	0.000173873	0.000215972	0.000181522	0.00013251	0.000145611	0.000396043	4.61638e-05	0.000276396	0.000102581	0.000240895	0.000102221	3.40955e-05	2.80322e-05	3.75638e-05	9.12276e-05	0.000331122	0.000323861	0.000212853	0.000233709	0.00015362	0.000170242	0.000104146	0.000194685	0.000253146	0.000240333	0.000176359	6.57472e-05	7.42983e-05	6.39039e-05	0.000121051	0.000113999	0.000121275	0.000187725	7.57489e-05	7.5093e-05	0.000208965	0.000258111	0.000277914	0.00032436	0.000215723	0.000115856	0.000149592	0.000135216
K00349	Na+-transporting NADH:ubiquinone oxidoreductase subunit D [EC:7.2.1.1]	0.000233884	0.000116631	0.000314649	0.000294806	0.000281173	0.000173873	0.000215972	0.000181522	0.00013251	0.000145611	0.000396043	4.61638e-05	0.000276396	0.000102581	0.000240895	0.000102221	3.40955e-05	2.80322e-05	3.75638e-05	9.12276e-05	0.000331122	0.000323861	0.000212853	0.000233709	0.00015362	0.000170242	0.000104146	0.000194685	0.000253146	0.000240333	0.000176359	6.57472e-05	7.42983e-05	6.39039e-05	0.000121051	0.000113999	0.000121275	0.000187725	7.57489e-05	7.5093e-05	0.000208965	0.000258111	0.000277914	0.00032436	0.000215723	0.000115856	0.000149592	0.000135216
K00350	Na+-transporting NADH:ubiquinone oxidoreductase subunit E [EC:7.2.1.1]	0.000233884	0.000116631	0.000314649	0.000294806	0.000281173	0.000173873	0.000215972	0.000181522	0.00013251	0.000145611	0.000396043	4.61638e-05	0.000276396	0.000102581	0.000240895	0.000102221	3.40955e-05	2.80322e-05	3.75638e-05	9.12276e-05	0.000331122	0.000323861	0.000212853	0.000233709	0.00015362	0.000170242	0.000104146	0.000194685	0.000253146	0.000240333	0.000176359	6.57472e-05	7.42983e-05	6.39039e-05	0.000121051	0.000113999	0.000121275	0.000187725	7.57489e-05	7.5093e-05	0.000208965	0.000258111	0.000277914	0.00032436	0.000215723	0.000115856	0.000149592	0.000135216
K00351	Na+-transporting NADH:ubiquinone oxidoreductase subunit F [EC:7.2.1.1]	0.000233884	0.000116631	0.000314649	0.000294806	0.000281173	0.000173873	0.000215972	0.000181522	0.00013251	0.000145611	0.000396043	4.61638e-05	0.000276396	0.000102581	0.000240895	0.000102221	3.40955e-05	2.80322e-05	3.75638e-05	9.12276e-05	0.000331122	0.000323861	0.000212853	0.000233709	0.00015362	0.000170242	0.000104146	0.000194685	0.000253146	0.000240333	0.000176359	6.57472e-05	7.42983e-05	6.39039e-05	0.000121051	0.000113999	0.000121275	0.000187725	7.57489e-05	7.5093e-05	0.000208965	0.000258111	0.000277914	0.00032436	0.000215723	0.000115856	0.000149592	0.000135216
K00354	NADPH2 dehydrogenase [EC:1.6.99.1]	5.39373e-06	4.02083e-06	2.86022e-06	9.79978e-06	2.2502e-05	1.15676e-05	1.30914e-05	1.5489e-05	1.76313e-06	4.62329e-06	1.54639e-05	3.26533e-05	2.1813e-05	4.65347e-05	2.64219e-05	4.74717e-05	1.29138e-05	0.000378934	6.05385e-06	5.50905e-06	1.99933e-05	8.64493e-06	1.35351e-05	1.46261e-05	4.31736e-05	2.70487e-05	7.87852e-06	1.37682e-05	2.07427e-05	6.76407e-06	2.22866e-06	3.84442e-06	5.41783e-05	2.58067e-05	0.00019705	6.2061e-05	7.07781e-06	1.99313e-05	2.08876e-06	2.34805e-05	7.20339e-07	3.52157e-05	3.53321e-05	1.17201e-06	1.47378e-05	1.13773e-05	2.32935e-05	5.90718e-06
K00355	NAD(P)H dehydrogenase (quinone) [EC:1.6.5.2]	8.32855e-07	3.66501e-06	2.00544e-06	5.09246e-06	9.96665e-06	9.7742e-06	2.34759e-05	8.88395e-07	9.55029e-07	2.91761e-06	3.1551e-06	2.82752e-06	4.16609e-06	3.55098e-06	0	3.86716e-06	1.98674e-07	2.40046e-06	1.54866e-06	5.42342e-07	7.04981e-06	0	8.15943e-06	8.90892e-06	3.96851e-06	3.71633e-06	2.56594e-06	5.70022e-06	1.0603e-05	3.67415e-06	2.6828e-06	2.47864e-06	5.40283e-06	3.69044e-06	2.38119e-06	3.07091e-06	1.61424e-06	2.42902e-06	9.04092e-07	1.69878e-06	1.40277e-06	5.72469e-06	2.04116e-05	1.35032e-05	5.98468e-06	0	1.12039e-05	1.04737e-06
K00356		2.71669e-06	0	1.29861e-06	2.35366e-07	2.2091e-06	2.24179e-06	4.30639e-07	0	8.99931e-07	0	2.02549e-06	0	4.80463e-07	3.04369e-07	0	0	0	0	0	0	0	3.13379e-06	8.6394e-07	8.00539e-07	0	0	6.3245e-07	6.57718e-07	9.26472e-07	5.20313e-07	0	0	0	0	0	0	0	0	0	0	1.06155e-06	2.85643e-07	0	0	4.27477e-07	1.90415e-07	3.03347e-06	8.37898e-07
K00362	nitrite reductase (NADH) large subunit [EC:1.7.1.15]	1.66571e-06	0	0	0	4.8292e-06	3.49719e-06	1.84314e-07	1.77679e-06	9.55029e-07	6.28408e-07	0	9.12103e-08	8.33218e-06	8.11652e-07	0	1.1571e-06	1.98674e-07	7.24971e-07	0	2.85443e-07	6.59311e-07	0	5.03965e-06	3.35794e-07	1.98426e-06	0	2.8912e-07	0	8.38972e-06	1.38255e-07	4.0179e-06	9.10521e-07	2.81397e-08	0	9.40715e-07	1.14267e-06	4.55298e-07	6.65486e-07	0	2.66823e-07	0	6.2262e-06	0	4.61692e-06	0	0	6.81976e-06	2.09475e-06
K00363	nitrite reductase (NADH) small subunit [EC:1.7.1.15]	8.32855e-07	0	0	0	2.4146e-06	1.7486e-06	9.21568e-08	8.88395e-07	4.77515e-07	3.14204e-07	0	9.12103e-08	4.16609e-06	4.05826e-07	0	5.78552e-07	1.98674e-07	7.24971e-07	0	2.85443e-07	3.29655e-07	0	2.8798e-06	1.67897e-07	9.92128e-07	0	2.8912e-07	0	1.08088e-06	6.91273e-08	1.33509e-06	9.10521e-07	2.81397e-08	0	4.70358e-07	5.71333e-07	4.55298e-07	3.32743e-07	0	1.33412e-07	0	3.1131e-06	0	4.5264e-08	0	0	3.40988e-06	1.04737e-06
K00364	GMP reductase [EC:1.7.1.7]	7.55518e-05	7.86375e-06	5.08594e-05	0.000322922	0.000302955	0.0001897	0.000302168	6.48528e-05	0.000192056	0.000199196	6.03675e-05	0.000130184	0.000180112	0.000381442	0.000252777	0.000340755	0.00029066	0.000468444	0.000530099	0.000192174	0.000124368	0.000308282	0.000145142	0.00014076	0.000435	0.000188391	0.000325874	0.000231363	0.000237949	0.00019697	0.000153347	0.000246961	0.000405265	0.000138629	0.000461164	0.000322474	0.000209189	0.000102252	9.37762e-05	0.000328433	0.000268687	0.000376367	0.000380265	6.35765e-05	1.13994e-05	0.000430386	0.000305206	0.000116384
K00366	ferredoxin-nitrite reductase [EC:1.7.7.1]	6.40406e-05	0.00019818	0.000103971	2.30158e-05	3.78116e-05	1.604e-05	3.09414e-05	0.000121266	0.000174302	3.31934e-05	2.69967e-05	5.25791e-05	1.04501e-05	0.000112217	2.53582e-05	1.78666e-05	9.75441e-05	6.39908e-05	4.71549e-05	5.21884e-05	5.97599e-05	3.43276e-05	6.68833e-05	0.000205392	1.14255e-05	3.68089e-05	0.000156043	2.87423e-05	8.68053e-05	0.000124479	2.98662e-05	7.62182e-05	3.87015e-05	4.62755e-05	3.66732e-06	1.00965e-05	6.46593e-05	2.66916e-05	6.72015e-05	4.98099e-05	2.19294e-05	1.71488e-05	3.38174e-05	3.29578e-05	1.40253e-05	6.26742e-05	0.000121368	5.09132e-05
K00370	nitrate reductase / nitrite oxidoreductase, alpha subunit [EC:1.7.5.1 1.7.99.-]	6.74216e-06	1.4233e-07	1.18025e-05	4.20235e-05	2.75367e-05	4.0128e-05	9.54848e-05	7.10716e-06	1.56111e-05	2.37897e-05	1.25035e-05	2.00207e-05	3.81209e-05	8.10975e-05	6.74492e-05	8.78486e-05	0.000114024	2.08953e-05	0.000106118	3.24834e-05	1.25282e-05	7.59313e-05	9.40734e-06	2.64723e-05	8.01704e-05	4.24121e-05	5.8619e-05	7.9277e-05	5.89854e-05	5.4065e-05	1.98372e-05	2.43312e-05	5.14676e-05	3.85124e-05	5.89417e-05	8.62712e-05	3.72516e-05	3.05458e-05	4.87898e-05	8.47609e-05	1.12221e-05	4.67875e-05	4.90409e-05	5.70811e-06	0	7.95936e-05	8.87898e-05	1.49984e-05
K00371	nitrate reductase / nitrite oxidoreductase, beta subunit [EC:1.7.5.1 1.7.99.-]	6.74216e-06	1.4233e-07	1.18025e-05	4.20235e-05	2.75367e-05	4.0128e-05	9.54848e-05	7.10716e-06	1.56111e-05	2.37897e-05	1.25035e-05	2.00207e-05	3.81209e-05	8.10975e-05	6.74492e-05	8.78486e-05	0.000114024	2.08953e-05	0.000106118	3.24834e-05	1.25282e-05	7.59313e-05	9.40734e-06	2.64723e-05	8.01704e-05	4.24121e-05	5.8619e-05	7.9277e-05	5.89854e-05	5.4065e-05	1.98372e-05	2.43312e-05	5.14676e-05	3.85124e-05	5.89417e-05	8.62712e-05	3.72516e-05	3.05458e-05	4.87898e-05	8.47609e-05	1.12221e-05	4.67875e-05	4.90409e-05	5.70811e-06	0	7.95936e-05	8.87898e-05	1.49984e-05
K00372	assimilatory nitrate reductase catalytic subunit [EC:1.7.99.-]	1.46741e-06	5.26622e-06	5.49032e-06	0	6.31906e-06	5.24579e-06	1.03414e-05	5.09862e-06	7.75043e-06	4.53351e-06	2.68768e-06	1.27694e-06	7.43324e-06	4.05826e-07	1.08103e-05	2.04016e-06	2.83951e-05	5.47756e-06	0	1.87536e-05	4.74289e-06	6.50531e-05	2.15505e-05	1.67897e-07	5.63273e-06	4.02283e-06	1.42753e-05	1.31544e-05	3.66471e-05	1.1962e-05	3.32197e-06	2.57981e-05	3.90955e-05	2.66239e-06	2.52817e-06	3.24945e-06	1.63907e-05	1.86336e-06	9.60208e-06	8.44941e-07	3.56378e-06	7.64258e-06	6.27117e-05	5.34729e-05	2.01525e-05	3.57029e-05	1.10268e-05	2.00677e-05
K00373	nitrate reductase molybdenum cofactor assembly chaperone NarJ/NarW	6.74216e-06	1.4233e-07	1.18025e-05	4.20235e-05	2.75367e-05	4.0128e-05	9.54848e-05	7.10716e-06	1.56111e-05	2.37897e-05	1.25035e-05	2.00207e-05	3.81209e-05	8.10975e-05	6.74492e-05	8.78486e-05	0.000114024	2.08953e-05	0.000106118	3.24834e-05	1.25282e-05	7.59313e-05	9.40734e-06	2.64723e-05	8.01704e-05	4.24121e-05	5.8619e-05	7.9277e-05	5.89854e-05	5.4065e-05	1.98372e-05	2.43312e-05	5.14676e-05	3.85124e-05	5.89417e-05	8.62712e-05	3.72516e-05	3.05458e-05	4.87898e-05	8.47609e-05	1.12221e-05	4.67875e-05	4.90409e-05	5.70811e-06	0	7.95936e-05	8.87898e-05	1.49984e-05
K00374	nitrate reductase gamma subunit [EC:1.7.5.1 1.7.99.-]	6.74216e-06	1.4233e-07	1.18025e-05	4.20235e-05	2.75367e-05	4.0128e-05	9.54848e-05	7.10716e-06	1.56111e-05	2.37897e-05	1.25035e-05	2.00207e-05	3.81209e-05	8.10975e-05	6.74492e-05	8.78486e-05	0.000114024	2.08953e-05	0.000106118	3.24834e-05	1.25282e-05	7.59313e-05	9.40734e-06	2.64723e-05	8.01704e-05	4.24121e-05	5.8619e-05	7.9277e-05	5.89854e-05	5.4065e-05	1.98372e-05	2.43312e-05	5.14676e-05	3.85124e-05	5.89417e-05	8.62712e-05	3.72516e-05	3.05458e-05	4.87898e-05	8.47609e-05	1.12221e-05	4.67875e-05	4.90409e-05	5.70811e-06	0	7.95936e-05	8.87898e-05	1.49984e-05
K00375	GntR family transcriptional regulator / MocR family aminotransferase	0.000403459	0.000590066	0.00036961	0.000173372	0.000189264	0.000337434	0.000252258	0.0004922	0.000430279	0.000376742	0.000191802	0.000412747	0.000237389	0.000311866	0.000267943	0.000366132	0.000290564	0.000213391	0.000189535	0.000400326	0.000282869	0.000116671	0.000335545	0.000297758	0.000267971	0.000406034	0.000304028	0.000312043	0.000165736	0.000284492	0.000481714	0.000329801	0.000295491	0.00054579	0.000242337	0.00036817	0.000332271	0.000476713	0.000586522	0.000337792	0.000284616	0.000128301	9.29693e-05	0.000288052	0.000270776	0.000199198	0.000296962	0.000465013
K00380	sulfite reductase (NADPH) flavoprotein alpha-component [EC:1.8.1.2]	2.81584e-05	2.8122e-05	2.57519e-06	9.44331e-06	4.64081e-05	9.89077e-05	1.1728e-05	1.11501e-05	5.71254e-05	0.000116555	0.000100753	0.000170892	1.79395e-05	2.61521e-06	1.13758e-05	1.80773e-05	3.61587e-07	7.52359e-06	0	9.70506e-07	7.25041e-06	1.36039e-05	1.92145e-05	4.67722e-05	7.4144e-06	1.38079e-05	1.94794e-05	4.5308e-06	6.47846e-05	8.5428e-06	8.88197e-05	0.000156363	7.76518e-05	0	1.44244e-05	5.71333e-07	4.55298e-07	3.32743e-07	2.28414e-05	3.31484e-05	5.25215e-05	2.10678e-05	3.80966e-05	2.23406e-05	3.97077e-05	2.76421e-05	6.88765e-05	2.48717e-05
K00381	sulfite reductase (NADPH) hemoprotein beta-component [EC:1.8.1.2]	2.81584e-05	2.8122e-05	3.10121e-06	9.44331e-06	4.64081e-05	0.000100881	1.06256e-05	1.05321e-05	5.67361e-05	0.000111483	0.000101695	0.000169314	1.81797e-05	2.91958e-06	1.13758e-05	1.80773e-05	1.62913e-07	6.79862e-06	0	6.85063e-07	7.25041e-06	1.41082e-05	1.93585e-05	4.67722e-05	7.4144e-06	1.37236e-05	1.95879e-05	5.18852e-06	6.53508e-05	8.5428e-06	6.74603e-05	0.000141168	7.53574e-05	0	1.44244e-05	5.71333e-07	0	3.32743e-07	2.28414e-05	3.31484e-05	5.3166e-05	2.10678e-05	3.80966e-05	2.23406e-05	3.97077e-05	2.76421e-05	7.14007e-05	2.48717e-05
K00382	dihydrolipoamide dehydrogenase [EC:1.8.1.4]	0.000611345	0.00031549	0.000641696	0.000577895	0.000601419	0.000645109	0.000597834	0.000531238	0.000469955	0.00054262	0.000998537	0.000538443	0.000725743	0.00041288	0.000728858	0.000580626	0.000631916	0.000712099	0.000445345	0.000557301	0.000762369	0.000768226	0.000596902	0.000575052	0.000538403	0.000534611	0.00042703	0.000655047	0.00071585	0.000621977	0.000675941	0.000638611	0.00059093	0.000456587	0.0006443	0.000557571	0.000573034	0.000578138	0.000453075	0.000479099	0.000588245	0.000672774	0.000629853	0.000714728	0.000599224	0.000431814	0.000554533	0.000626137
K00383	glutathione reductase (NADPH) [EC:1.8.1.7]	6.39315e-05	3.23802e-06	9.59984e-06	0.000137539	0.000253584	0.000130293	7.76331e-05	5.31106e-05	0.000143093	0.000132675	2.2818e-05	4.77759e-05	5.35576e-05	7.84935e-05	7.30556e-05	7.76356e-05	5.54453e-05	5.65477e-05	0.000106928	7.28308e-05	1.76483e-05	0.000108764	7.1755e-05	2.83382e-05	0.000203898	0.000101536	0.000160642	8.90331e-05	0.000131096	9.77765e-05	9.52101e-05	0.000140683	0.000185371	6.90112e-05	0.000151257	0.000116009	7.02814e-05	4.42548e-05	3.25785e-05	0.000114725	1.85772e-05	0.000260967	0.000119686	2.0212e-05	4.11192e-06	0.000194319	0.000144676	9.53947e-05
K00384	thioredoxin reductase (NADPH) [EC:1.8.1.9]	0.00138004	0.00151595	0.00122691	0.00149326	0.00146059	0.00151802	0.00153219	0.00158258	0.00163797	0.00146028	0.0011054	0.00133143	0.0013591	0.00173154	0.00153508	0.00184828	0.00190733	0.00228209	0.00198392	0.00167413	0.00139366	0.00141985	0.00153191	0.00150127	0.0017711	0.00164364	0.00180955	0.00173512	0.00149164	0.00159288	0.00141874	0.00160375	0.00180795	0.00171524	0.00193241	0.00179797	0.0017434	0.00147693	0.00144193	0.0017711	0.00149016	0.00160913	0.00147118	0.00129987	0.00128492	0.00178386	0.00171795	0.00170885
K00385	anaerobic sulfite reductase subunit C	6.17701e-06	1.43782e-05	1.1145e-05	9.58581e-06	1.30491e-05	1.3574e-05	2.60106e-05	1.92357e-05	1.68508e-05	2.01764e-05	2.33353e-05	3.7461e-05	1.21317e-05	5.12355e-06	2.80751e-05	8.60977e-06	9.59137e-05	6.57468e-05	4.25089e-05	7.57089e-05	2.00685e-05	9.89485e-05	5.82919e-05	1.33928e-05	1.19695e-05	1.69246e-05	4.7497e-05	3.90904e-05	7.69744e-05	3.41363e-05	1.84705e-05	9.95883e-05	9.85078e-05	2.2459e-05	6.51886e-06	1.54528e-05	7.1668e-05	1.0903e-05	1.94093e-05	2.78653e-05	6.90957e-06	1.93931e-05	9.36889e-05	6.98965e-05	5.0198e-05	7.06955e-05	1.58683e-05	4.26595e-05
K00389	putative membrane protein	8.72515e-07	0	0	4.27938e-08	2.4146e-06	2.89191e-06	4.12466e-06	2.45274e-06	4.77515e-07	3.14204e-07	1.79178e-06	0	4.34434e-06	4.05826e-07	1.00628e-07	5.78552e-07	0	1.28884e-07	0	0	3.38415e-06	2.17924e-06	5.42362e-06	3.62622e-07	2.09627e-06	1.83901e-06	2.5298e-06	2.63087e-07	3.19118e-06	2.31242e-06	2.43891e-06	0	1.38823e-06	0	1.35228e-06	1.67829e-06	0	9.3168e-07	0	1.33412e-07	2.08519e-07	3.28816e-06	3.25677e-06	1.76287e-06	1.36385e-06	6.18849e-07	4.40627e-06	3.03738e-06
K00390	phosphoadenosine phosphosulfate reductase [EC:1.8.4.8 1.8.4.10]	3.03794e-05	3.36729e-05	2.97144e-05	1.81946e-05	4.64081e-05	0.000100881	1.48674e-05	2.32787e-05	6.97943e-05	0.000111483	0.000115406	0.000175607	2.59632e-05	3.56214e-06	3.23063e-05	2.63445e-05	3.28066e-05	9.8712e-06	1.02071e-06	4.11323e-05	9.80808e-06	1.97634e-05	2.14223e-05	5.12726e-05	1.2215e-05	1.5486e-05	2.92915e-05	7.57823e-06	7.48728e-05	9.04453e-06	7.04795e-05	0.000159732	0.000153755	1.12822e-05	2.86233e-05	1.97288e-05	5.11175e-06	9.79928e-06	5.29415e-05	4.4515e-05	5.40759e-05	3.06164e-05	3.87025e-05	3.50307e-05	8.24147e-05	3.18788e-05	8.02575e-05	5.8639e-05
K00392	sulfite reductase (ferredoxin) [EC:1.8.7.1]	0	0	0	0	0	0	3.66043e-06	0	0	0	0	0	0	0	0	0	0	0	0	0	0	0	1.00793e-06	0	0	0	2.5298e-06	2.63087e-07	0	0	0	0	1.38823e-06	0	0	0	0	0	0	0	0	0	1.13608e-07	0	1.22136e-07	6.18849e-07	0	1.92717e-06
K00394	adenylylsulfate reductase, subunit A [EC:1.8.99.2]	0	1.54073e-07	0	0	0	0	0	0	0	1.79545e-07	4.21848e-07	2.58581e-07	0	3.38188e-07	0	0	0	0	0	4.37584e-07	0	0	0	0	0	0	0	0	0	0	0	0	0	0	2.35179e-07	0	0	7.22052e-08	9.76731e-07	0	0	0	0	0	0	5.89478e-06	2.80319e-07	0
K00395	adenylylsulfate reductase, subunit B [EC:1.8.99.2]	0	1.54073e-07	0	0	0	0	0	0	0	1.79545e-07	4.21848e-07	2.58581e-07	0	3.38188e-07	0	0	0	0	0	4.37584e-07	0	0	0	0	0	0	0	0	0	0	0	0	0	0	2.35179e-07	0	0	7.22052e-08	9.76731e-07	0	0	0	0	0	0	5.89478e-06	2.80319e-07	0
K00404	cytochrome c oxidase cbb3-type subunit I [EC:7.1.1.9]	2.71669e-06	0	1.29861e-06	2.35366e-07	2.2091e-06	2.24179e-06	4.30639e-07	0	8.99931e-07	0	2.02549e-06	9.12103e-08	4.80463e-07	3.04369e-07	0	0	0	0	0	0	0	3.13379e-06	8.6394e-07	8.00539e-07	0	0	6.3245e-07	6.57718e-07	9.26472e-07	5.20313e-07	0	0	0	0	0	0	0	0	0	0	1.06155e-06	2.85643e-07	0	0	4.27477e-07	1.90415e-07	3.03347e-06	8.37898e-07
K00405	cytochrome c oxidase cbb3-type subunit II	2.71669e-06	0	1.29861e-06	2.35366e-07	2.2091e-06	2.24179e-06	4.30639e-07	0	8.99931e-07	0	2.02549e-06	9.12103e-08	4.80463e-07	3.04369e-07	0	0	0	0	0	0	0	3.13379e-06	8.6394e-07	8.00539e-07	0	0	6.3245e-07	6.57718e-07	9.26472e-07	5.20313e-07	0	0	0	0	0	0	0	0	0	0	1.06155e-06	2.85643e-07	0	0	4.27477e-07	1.90415e-07	3.03347e-06	8.37898e-07
K00406	cytochrome c oxidase cbb3-type subunit III	0	0	5.26018e-07	0	0	2.24179e-06	0	0	4.40783e-07	0	2.02549e-06	9.12103e-08	4.80463e-07	3.04369e-07	0	0	0	0	0	0	0	5.04288e-07	8.6394e-07	0	0	0	3.9754e-07	6.57718e-07	9.26472e-07	0	0	0	0	0	0	0	0	0	0	0	6.44514e-07	0	0	0	0	0	2.5242e-06	0
K00407	cytochrome c oxidase cbb3-type subunit IV	0	0	5.26018e-07	0	0	2.24179e-06	0	0	4.40783e-07	0	2.02549e-06	9.12103e-08	4.80463e-07	3.04369e-07	0	0	0	0	0	0	0	5.04288e-07	8.6394e-07	0	0	0	3.9754e-07	6.57718e-07	9.26472e-07	0	0	0	0	0	0	0	0	0	0	0	6.44514e-07	0	0	0	0	0	2.5242e-06	0
K00410	ubiquinol-cytochrome c reductase cytochrome b/c1 subunit	0	0	5.26018e-07	0	0	2.24179e-06	0	0	4.40783e-07	0	2.02549e-06	0	4.80463e-07	3.04369e-07	0	0	0	0	0	0	0	5.04288e-07	8.6394e-07	0	0	0	3.9754e-07	6.57718e-07	9.26472e-07	0	0	0	0	0	0	0	0	0	0	0	6.44514e-07	0	0	0	0	0	2.5242e-06	0
K00411	ubiquinol-cytochrome c reductase iron-sulfur subunit [EC:7.1.1.8]	0	0	5.26018e-07	0	0	2.24179e-06	0	0	4.40783e-07	0	2.02549e-06	9.12103e-08	4.80463e-07	3.04369e-07	0	0	0	0	0	0	0	5.04288e-07	8.6394e-07	0	0	0	3.9754e-07	6.57718e-07	9.26472e-07	0	0	0	0	0	0	0	0	0	0	0	6.44514e-07	0	0	0	0	0	2.5242e-06	0
K00412	ubiquinol-cytochrome c reductase cytochrome b subunit	0	0	5.26018e-07	0	0	2.24179e-06	0	0	4.40783e-07	0	2.02549e-06	9.12103e-08	4.80463e-07	3.04369e-07	0	0	0	0	0	0	0	5.04288e-07	8.6394e-07	0	0	0	3.9754e-07	6.57718e-07	9.26472e-07	0	0	0	0	0	0	0	0	0	0	0	6.44514e-07	0	0	0	0	0	2.5242e-06	0
K00413	ubiquinol-cytochrome c reductase cytochrome c1 subunit	0	0	5.26018e-07	0	0	2.24179e-06	0	0	4.40783e-07	0	2.02549e-06	9.12103e-08	4.80463e-07	3.04369e-07	0	0	0	0	0	0	0	5.04288e-07	8.6394e-07	0	0	0	3.9754e-07	6.57718e-07	9.26472e-07	0	0	0	0	0	0	0	0	0	0	0	6.44514e-07	0	0	0	0	0	2.5242e-06	0
K00425	cytochrome bd ubiquinol oxidase subunit I [EC:7.1.1.7]	0.000339755	0.000157936	0.00037101	0.000617244	0.000629714	0.00046896	0.00052635	0.000258607	0.000377295	0.000445473	0.000557393	0.000326663	0.000470772	0.000478015	0.000501425	0.00044997	0.000327318	0.000484973	0.000556769	0.00028306	0.000464111	0.000638885	0.000377858	0.000424616	0.000576176	0.000369648	0.000443718	0.000428079	0.000555725	0.000445493	0.00033056	0.00040747	0.000545328	0.000198869	0.000562068	0.000426457	0.000329843	0.000292922	0.000195578	0.000431818	0.000533831	0.000652628	0.000685938	0.000410741	0.000268927	0.00056741	0.000520929	0.000279781
K00426	cytochrome bd ubiquinol oxidase subunit II [EC:7.1.1.7]	0.000339755	0.000157936	0.00037101	0.000617244	0.000629714	0.00046896	0.00052635	0.000258607	0.000377295	0.000445473	0.000557393	0.000326663	0.000470772	0.000478015	0.000501425	0.00044997	0.000327517	0.000485698	0.000556769	0.000283345	0.000464111	0.000638885	0.000378577	0.000424616	0.000576176	0.000369648	0.000444007	0.000428079	0.000556085	0.000445493	0.00033056	0.00040747	0.000545328	0.000198869	0.000562068	0.000426457	0.000330298	0.000292922	0.000195578	0.000431818	0.000533831	0.000652628	0.000685938	0.000410741	0.000268927	0.00056741	0.000520929	0.000279781
K00427	L-lactate permease	8.32855e-07	0	0	0	2.4146e-06	1.7486e-06	9.21568e-08	8.88395e-07	4.77515e-07	3.14204e-07	0	0	4.16609e-06	4.05826e-07	0	5.78552e-07	0	0	0	0	3.29655e-07	0	2.15985e-06	1.67897e-07	9.92128e-07	0	0	0	7.20589e-07	6.91273e-08	1.05125e-06	0	0	0	4.70358e-07	5.71333e-07	0	3.32743e-07	0	1.33412e-07	0	3.1131e-06	0	4.5264e-08	0	0	3.40988e-06	1.04737e-06
K00428	cytochrome c peroxidase [EC:1.11.1.5]	3.00819e-05	2.79797e-05	3.8738e-06	9.72147e-06	4.62026e-05	0.000100006	1.01416e-05	1.05901e-05	5.58876e-05	0.000105782	0.000103768	0.000162628	1.3341e-05	2.73357e-06	1.14764e-05	1.74988e-05	1.62913e-07	6.9275e-06	0	0	9.6456e-06	1.93312e-05	1.95505e-05	4.75996e-05	7.52641e-06	1.54783e-05	1.98228e-05	5.18852e-06	6.73066e-05	1.11681e-05	4.64373e-05	0.000125972	7.30631e-05	0	1.48948e-05	1.10696e-06	0	5.98937e-07	2.28414e-05	3.30149e-05	5.38674e-05	1.82811e-05	4.1448e-05	2.40129e-05	4.13769e-05	2.78325e-05	6.94965e-05	2.47251e-05
K00432	glutathione peroxidase [EC:1.11.1.9]	0.00019236	0.000180881	0.000285201	0.00014689	0.000148472	0.00014084	0.000184502	0.000138396	9.55158e-05	0.000139161	0.000363175	0.000114158	0.000173179	0.000123236	0.000247165	0.00011531	0.000231684	0.000169896	9.81551e-05	0.000166475	0.000301136	0.000236637	0.000225488	0.000156463	0.000190793	0.000156505	0.000102412	0.000222988	0.000225261	0.000260165	0.000211925	0.000172163	0.000123345	0.000114417	0.000173128	0.0001363	0.000175883	0.00016961	0.000244456	0.000156504	0.000153006	0.000199739	0.000200613	0.000165284	0.00015552	0.000102233	7.50687e-05	9.28705e-05
K00433	non-heme chloroperoxidase [EC:1.11.1.10]	1.61713e-05	1.67267e-05	1.66025e-05	1.35656e-05	1.88544e-05	1.20945e-05	3.45218e-05	1.52572e-05	2.40381e-05	2.2286e-05	2.26731e-05	3.6184e-05	1.68263e-05	7.76142e-06	1.01346e-05	2.07289e-05	8.01421e-05	7.5763e-05	4.89148e-05	4.43102e-05	2.8556e-05	3.82538e-05	5.12844e-05	2.14363e-05	1.37618e-05	3.53913e-05	4.74066e-05	5.49414e-05	5.64376e-05	4.24932e-05	2.38109e-05	6.70624e-05	3.1279e-05	2.46732e-05	8.45909e-06	1.2114e-05	6.21895e-05	1.85561e-05	1.96899e-05	3.93476e-05	2.40461e-05	2.97289e-05	3.73013e-05	5.21999e-05	1.21729e-05	4.32757e-05	1.46284e-05	2.61319e-05
K00448	protocatechuate 3,4-dioxygenase, alpha subunit [EC:1.13.11.3]	8.32855e-07	0	0	0	2.4146e-06	1.7486e-06	9.21568e-08	8.88395e-07	4.77515e-07	3.14204e-07	0	0	4.16609e-06	4.05826e-07	0	5.78552e-07	0	0	0	0	3.29655e-07	0	2.15985e-06	1.67897e-07	9.92128e-07	0	0	0	7.20589e-07	6.91273e-08	1.05125e-06	0	0	0	4.70358e-07	5.71333e-07	0	3.32743e-07	0	1.33412e-07	0	3.1131e-06	0	4.5264e-08	0	0	3.40988e-06	1.04737e-06
K00449	protocatechuate 3,4-dioxygenase, beta subunit [EC:1.13.11.3]	8.32855e-07	0	0	0	2.4146e-06	1.7486e-06	9.21568e-08	8.88395e-07	4.77515e-07	3.14204e-07	0	0	4.16609e-06	4.05826e-07	0	5.78552e-07	0	0	0	0	3.29655e-07	0	2.15985e-06	1.67897e-07	9.92128e-07	0	0	0	7.20589e-07	6.91273e-08	1.05125e-06	0	0	0	4.70358e-07	5.71333e-07	0	3.32743e-07	0	1.33412e-07	0	3.1131e-06	0	4.5264e-08	0	0	3.40988e-06	1.04737e-06
K00450	gentisate 1,2-dioxygenase [EC:1.13.11.4]	3.09346e-06	4.02083e-06	0	5.5204e-06	4.6237e-06	3.004e-06	2.75609e-06	1.02359e-05	1.02849e-06	4.62329e-06	1.44122e-06	3.28357e-06	0	9.80746e-07	1.66754e-06	2.92321e-06	0	0	1.02071e-06	3.9962e-06	3.8783e-06	0	7.63147e-06	6.36104e-06	3.61647e-06	7.66253e-06	2.20454e-06	9.64653e-06	8.23531e-06	0	0	1.51754e-06	9.7551e-07	4.9821e-06	1.46987e-06	4.53495e-06	2.48344e-07	3.79327e-06	0	2.98842e-06	7.20339e-07	2.52998e-06	0	1.17201e-06	7.45031e-06	0	6.64263e-07	2.4299e-06
K00451	homogentisate 1,2-dioxygenase [EC:1.13.11.5]	0	0	0	0	0	0	0	0	0	0	0	0	0	0	0	0	1.98674e-07	7.24971e-07	0	2.85443e-07	0	0	7.1995e-07	0	0	0	2.8912e-07	0	3.60295e-07	0	0	0	0	0	0	0	4.55298e-07	0	0	0	0	0	0	0	0	0	0	0
K00452	3-hydroxyanthranilate 3,4-dioxygenase [EC:1.13.11.6]	0	0	0	0	0	0	0	0	0	0	0	0	0	0	0	0	1.98674e-07	7.24971e-07	0	2.85443e-07	0	0	7.1995e-07	0	0	0	2.8912e-07	0	3.60295e-07	0	0	0	0	0	0	0	4.55298e-07	0	0	0	0	0	0	0	0	0	0	0
K00453	tryptophan 2,3-dioxygenase [EC:1.13.11.11]	0	1.4233e-07	0	0	0	0	0	0	0	3.14204e-07	0	0	0	0	0	0	1.98674e-07	7.24971e-07	0	1.2274e-06	0	0	7.1995e-07	0	0	0	2.8912e-07	0	3.60295e-07	0	0	0	0	0	0	0	4.55298e-07	0	0	0	0	0	0	0	0	0	0	0
K00455	3,4-dihydroxyphenylacetate 2,3-dioxygenase [EC:1.13.11.15]	8.32855e-07	0	0	0	2.4146e-06	1.7486e-06	9.21568e-08	8.88395e-07	4.77515e-07	3.14204e-07	0	0	4.16609e-06	4.05826e-07	0	5.78552e-07	0	0	0	0	3.29655e-07	0	2.15985e-06	1.67897e-07	9.92128e-07	0	0	0	7.20589e-07	6.91273e-08	1.05125e-06	0	0	0	4.70358e-07	5.71333e-07	0	3.32743e-07	0	1.33412e-07	0	3.1131e-06	0	4.5264e-08	0	0	3.40988e-06	1.04737e-06
K00457	4-hydroxyphenylpyruvate dioxygenase [EC:1.13.11.27]	8.32855e-07	0	0	0	2.4146e-06	1.7486e-06	9.21568e-08	8.88395e-07	4.77515e-07	3.14204e-07	0	9.12103e-08	4.16609e-06	4.05826e-07	0	5.78552e-07	1.98674e-07	7.24971e-07	0	2.85443e-07	3.29655e-07	0	2.8798e-06	1.67897e-07	9.92128e-07	0	2.8912e-07	0	1.08088e-06	6.91273e-08	1.05125e-06	0	0	0	4.70358e-07	5.71333e-07	4.55298e-07	3.32743e-07	0	1.33412e-07	0	3.1131e-06	0	4.5264e-08	0	0	3.40988e-06	1.04737e-06
K00459	nitronate monooxygenase [EC:1.13.12.16]	3.56938e-06	1.4233e-07	5.22731e-06	1.88293e-06	5.65119e-06	2.60048e-06	1.31664e-05	1.50641e-06	5.86241e-06	1.09971e-05	6.53611e-06	2.33772e-05	6.61645e-06	3.28043e-06	1.58129e-06	5.78552e-07	2.79672e-06	1.27273e-06	2.63976e-06	4.22456e-06	4.17452e-06	2.16123e-07	4.89566e-06	1.4228e-06	9.92128e-07	1.54017e-06	3.9754e-06	2.63087e-07	1.08088e-06	3.85998e-06	7.35773e-05	4.71144e-05	7.47203e-06	1.34437e-06	1.0583e-06	5.71333e-07	1.44867e-06	1.26442e-06	1.43408e-06	2.44588e-06	4.2083e-06	3.72519e-06	1.13608e-07	6.91892e-07	1.22136e-07	3.28466e-06	3.40988e-06	5.23686e-06
K00472	prolyl 4-hydroxylase [EC:1.14.11.2]	0	0	0	0	0	0	0	0	0	0	0	0	0	0	0	0	1.98674e-07	7.24971e-07	0	2.85443e-07	0	0	7.1995e-07	0	0	0	2.8912e-07	0	3.60295e-07	0	0	0	0	0	0	0	4.55298e-07	0	0	0	0	0	0	0	0	0	0	0
K00481	p-hydroxybenzoate 3-monooxygenase [EC:1.14.13.2]	8.32855e-07	0	0	0	2.4146e-06	1.7486e-06	9.21568e-08	8.88395e-07	4.77515e-07	3.14204e-07	0	0	4.16609e-06	4.05826e-07	0	5.78552e-07	0	0	0	0	3.29655e-07	0	2.15985e-06	1.67897e-07	9.92128e-07	0	0	0	7.20589e-07	6.91273e-08	1.05125e-06	0	0	0	4.70358e-07	5.71333e-07	0	3.32743e-07	0	1.33412e-07	0	3.1131e-06	0	4.5264e-08	0	0	3.40988e-06	1.04737e-06
K00483	4-hydroxyphenylacetate 3-monooxygenase [EC:1.14.14.9]	8.32855e-07	0	1.09806e-05	0	2.4146e-06	1.7486e-06	9.21568e-08	5.75525e-06	7.08925e-06	3.14204e-07	3.50566e-06	0	1.07004e-05	4.05826e-07	2.03555e-05	5.78552e-07	4.34026e-06	0	0	3.77641e-05	3.29655e-07	5.47513e-06	2.15985e-06	1.67897e-07	5.79275e-06	1.76238e-06	7.5894e-06	0	7.20589e-07	6.91273e-08	1.05125e-06	1.84128e-05	6.8886e-05	5.32478e-06	3.99804e-06	5.92758e-06	0	3.39398e-06	1.22208e-05	1.33412e-07	0	1.21721e-05	0	4.5264e-08	4.0305e-05	0	1.22667e-05	3.10441e-05
K00484	flavin reductase (NADH) [EC:1.5.1.36]	8.32855e-07	0	0	0	2.4146e-06	1.7486e-06	9.21568e-08	8.88395e-07	4.77515e-07	3.14204e-07	6.23229e-07	4.92535e-06	4.59851e-06	4.05826e-07	0	5.78552e-07	0	0	0	0	3.29655e-07	0	2.15985e-06	1.67897e-07	9.92128e-07	0	0	0	7.20589e-07	6.91273e-08	1.05125e-06	0	0	0	4.70358e-07	5.71333e-07	0	3.32743e-07	0	1.33412e-07	0	3.1131e-06	0	4.5264e-08	0	0	3.40988e-06	1.04737e-06
K00491	nitric-oxide synthase, bacterial [EC:1.14.14.47]	0	1.4233e-07	0	0	0	2.69015e-07	1.10244e-06	6.18014e-07	8.30141e-07	5.38635e-06	1.08286e-06	1.66915e-06	2.40231e-07	0	0	0	1.98674e-07	7.24971e-07	0	1.2274e-06	0	0	7.1995e-07	0	0	8.42879e-08	2.8912e-07	0	3.60295e-07	0	2.29909e-05	1.51956e-05	2.29433e-06	0	0	0	4.55298e-07	0	0	0	1.5165e-07	0	0	0	0	0	0	0
K00500	phenylalanine-4-hydroxylase [EC:1.14.16.1]	0	0	0	0	0	0	0	0	0	0	0	9.12103e-08	0	0	0	0	1.98674e-07	7.24971e-07	0	2.85443e-07	0	0	7.1995e-07	0	0	0	2.8912e-07	0	3.60295e-07	0	0	0	0	0	0	0	4.55298e-07	0	0	0	0	0	0	0	0	0	0	0
K00507	stearoyl-CoA desaturase (Delta-9 desaturase) [EC:1.14.19.1]	0	0	0	0	0	0	0	0	0	0	0	9.12103e-08	0	0	0	0	0	0	0	0	0	0	0	0	0	0	0	0	0	0	0	0	0	0	0	0	0	0	0	0	0	0	0	0	0	0	0	0
K00510	heme oxygenase 1 [EC:1.14.14.18]	3.17278e-07	2.63311e-06	0	0	1.95223e-06	1.7486e-06	8.78504e-06	8.88395e-07	1.98352e-06	2.10966e-06	4.67422e-07	6.38472e-07	0	0	3.16258e-07	7.30803e-07	1.31125e-05	2.73878e-06	0	0	2.20662e-06	3.11578e-05	1.07033e-05	0	1.12014e-06	1.57082e-06	7.7701e-06	6.84027e-06	1.00368e-05	5.94644e-06	1.13536e-06	8.29586e-06	3.71444e-06	0	0	0	8.19536e-06	0	1.74583e-06	3.55764e-07	1.78189e-06	0	3.12801e-05	1.99242e-05	1.22136e-07	1.84703e-05	1.59423e-06	3.93812e-06
K00517	indol-3-yl-methylglucosinolate hydroxylase [EC:1.14.-.-]	0	0	0	0	0	0	0	0	0	0	0	0	0	0	0	0	1.98674e-07	7.24971e-07	0	2.85443e-07	0	0	7.1995e-07	0	0	0	2.8912e-07	0	3.60295e-07	0	0	0	0	0	0	0	4.55298e-07	0	0	0	0	0	0	0	0	0	0	0
K00520	mercuric reductase [EC:1.16.1.1]	0	1.24539e-06	0	0	0	5.38029e-07	4.35807e-06	1.23603e-06	2.24799e-06	1.48125e-05	1.02287e-05	2.63233e-05	2.69059e-06	1.42039e-06	0	2.13151e-06	0	1.41772e-06	0	6.85063e-07	0	0	0	0	0	8.58204e-07	3.9754e-07	0	0	0	9.20226e-05	6.0489e-05	8.50945e-06	1.02805e-06	1.1465e-06	9.64124e-07	0	1.26442e-06	0	0	0	0	0	0	0	0	0	0
K00525	ribonucleoside-diphosphate reductase alpha chain [EC:1.17.4.1]	0.000501299	0.000319751	0.000440938	0.000642749	0.000542724	0.000642609	0.00070763	0.000463247	0.000418697	0.000583015	0.00075544	0.000633557	0.000710681	0.000595163	0.000670638	0.000800679	0.000857396	0.000866167	0.000882428	0.000607032	0.000678442	0.00075913	0.000634724	0.000548088	0.000656946	0.000558382	0.000541386	0.000757234	0.000690218	0.000611887	0.000715031	0.000803752	0.000652718	0.000532992	0.000721666	0.000676192	0.000765149	0.00053677	0.000413708	0.000666854	0.000720665	0.000620695	0.000731362	0.000692222	0.000511042	0.000650851	0.000637788	0.00053511
K00526	ribonucleoside-diphosphate reductase beta chain [EC:1.17.4.1]	0.000105098	5.02722e-05	7.67658e-05	0.000358976	0.000328219	0.000233314	0.00037627	9.02107e-05	0.000229643	0.000246922	0.000104437	0.000210108	0.000221225	0.000406282	0.000277588	0.00038592	0.000486278	0.000589893	0.000619807	0.000309729	0.000182714	0.000347301	0.000260778	0.000198729	0.000461764	0.000246462	0.000409854	0.00038471	0.000332681	0.000295472	0.000272609	0.000397938	0.000503268	0.00017807	0.000485299	0.000354058	0.000331643	0.000131048	0.000139669	0.000390683	0.000282875	0.000437343	0.000436558	0.000136145	9.08897e-05	0.000501391	0.000342641	0.000182609
K00527	ribonucleoside-triphosphate reductase (thioredoxin) [EC:1.17.4.2]	0.0010562	0.0011636	0.00106928	0.00115744	0.00102063	0.00107877	0.00121484	0.00115029	0.00118942	0.00108088	0.000893157	0.00103102	0.00109084	0.00133423	0.0011606	0.00140283	0.00129775	0.00112203	0.00147652	0.00121732	0.0010803	0.00112704	0.00109156	0.0011948	0.00121227	0.00119976	0.00130642	0.00119199	0.00112149	0.00114994	0.00103041	0.00115416	0.00125534	0.00126095	0.00117973	0.0012334	0.00121892	0.00114291	0.00123665	0.00130919	0.00122359	0.00105439	0.00117824	0.00110812	0.00104809	0.00127731	0.00120477	0.00124923
K00528	ferredoxin/flavodoxin---NADP+ reductase [EC:1.18.1.2 1.19.1.1]	0.000581035	0.000719966	0.000512547	0.000427567	0.000394029	0.000492118	0.000447871	0.000622707	0.000566341	0.000493962	0.000316334	0.000481549	0.000530777	0.000433301	0.000337464	0.000456508	0.000495488	0.000301994	0.000326776	0.000523721	0.000442244	0.000317422	0.00057464	0.000476305	0.000326146	0.000523744	0.000457053	0.000517745	0.000339874	0.000504014	0.00050312	0.000393147	0.000291024	0.000620653	0.000299471	0.000474643	0.000557595	0.000601727	0.000671982	0.000460934	0.00043203	0.000332021	0.00028153	0.000569007	0.000706385	0.000395877	0.000423024	0.000628801
K00529	3-phenylpropionate/trans-cinnamate dioxygenase ferredoxin reductase component [EC:1.18.1.3]	8.32855e-07	0	0	0	2.4146e-06	1.7486e-06	0	8.88395e-07	4.77515e-07	3.14204e-07	0	0	3.98784e-06	4.05826e-07	0	5.78552e-07	0	0	0	0	0	0	2.15985e-06	1.67897e-07	9.92128e-07	0	0	0	7.20589e-07	0	1.05125e-06	0	0	0	4.70358e-07	5.71333e-07	0	3.32743e-07	0	1.33412e-07	0	2.93804e-06	0	4.5264e-08	0	0	3.40988e-06	1.04737e-06
K00532	ferredoxin hydrogenase [EC:1.12.7.2]	5.70109e-06	6.32481e-06	1.06519e-05	1.97921e-05	6.93555e-06	9.09046e-06	1.06368e-05	1.52669e-05	8.32896e-06	1.4487e-05	1.97583e-05	3.65981e-05	8.86454e-06	5.15737e-06	1.72073e-05	6.41736e-06	5.65763e-05	5.95846e-05	4.25089e-05	5.79378e-05	1.34487e-05	2.73756e-06	2.9206e-05	1.97322e-05	6.2088e-06	1.1331e-05	2.72224e-05	1.93588e-05	5.17023e-05	1.67801e-05	1.66203e-05	6.69613e-05	5.70861e-05	2.03501e-05	4.60804e-06	1.27746e-05	5.41183e-05	1.01237e-05	7.08465e-06	2.78297e-05	2.54962e-06	1.33946e-05	1.89347e-07	1.61051e-05	2.8417e-05	1.84822e-05	1.04953e-05	2.24242e-05
K00533	ferredoxin hydrogenase large subunit [EC:1.12.7.2]	3.01018e-05	1.15405e-05	3.30898e-05	1.7581e-05	1.09428e-05	1.54683e-05	4.67674e-05	3.29865e-05	3.31384e-05	9.8301e-06	7.78374e-06	3.77004e-05	1.15791e-05	5.18331e-05	1.46341e-05	2.5502e-05	3.8599e-05	2.9321e-06	1.60849e-05	2.7469e-05	1.77924e-05	9.00514e-07	1.92947e-05	6.15333e-05	5.02465e-06	1.91563e-05	1.73833e-05	1.22774e-05	1.8478e-05	3.00607e-05	1.46335e-05	1.81598e-05	2.67016e-05	4.41799e-05	1.40813e-05	2.16035e-05	2.18199e-05	7.24271e-05	7.64684e-05	2.97003e-05	1.63278e-05	3.14207e-06	2.46151e-06	1.2488e-05	1.42492e-05	2.58408e-05	2.09314e-05	2.10107e-05
K00537	arsenate reductase (glutaredoxin) [EC:1.20.4.1]	0.000764501	0.000733559	0.000715634	0.000677832	0.000795628	0.000778293	0.000596744	0.000731397	0.000769583	0.000794497	0.000740684	0.000704737	0.000602909	0.000551154	0.000615719	0.000611926	0.000608238	0.000788631	0.000402563	0.000605755	0.000706096	0.00062082	0.000742056	0.000665281	0.000637624	0.00074062	0.000668029	0.000688623	0.000719144	0.000723199	0.000734946	0.000683944	0.000668255	0.000705434	0.000670213	0.000646018	0.000641059	0.000710079	0.000726106	0.000640142	0.000559969	0.000775864	0.000610123	0.000704144	0.000557616	0.000664462	0.000674957	0.00074116
K00547	homocysteine S-methyltransferase [EC:2.1.1.10]	4.73934e-05	0.000152649	5.96045e-05	0.000189662	7.23866e-05	0.000115273	0.000249458	7.16124e-05	8.1824e-05	0.000117333	5.95495e-05	0.000177021	0.000261069	0.000349112	0.000234635	0.00028818	0.000288521	0.000426584	0.000493002	0.00021481	0.000137474	0.000209694	0.00011332	0.000131413	0.000289605	0.000135788	0.000174556	0.000171029	0.000120647	0.000132526	0.000108006	0.000188043	0.000229842	0.00015202	0.000350887	0.000286434	0.000202897	0.000149102	0.000218058	0.000268593	0.000258602	0.000131244	0.000256622	9.75649e-05	0.000107297	0.00024078	0.00019547	4.28794e-05
K00548	5-methyltetrahydrofolate--homocysteine methyltransferase [EC:2.1.1.13]	0.000918342	0.000915457	0.000744845	0.000591389	0.00068936	0.000865409	0.000582058	0.00100522	0.000740524	0.000815378	0.00084553	0.000881908	0.000865115	0.000520446	0.000725302	0.000657629	0.000643113	0.000509879	0.00048862	0.000814557	0.000748621	0.000628079	0.000820147	0.000650833	0.000611205	0.000842428	0.000523108	0.000695135	0.000614427	0.000674231	0.000825167	0.000814874	0.0005203	0.000974481	0.000543092	0.000750115	0.0008393	0.000947275	0.000797389	0.000607794	0.000781436	0.000549171	0.000502157	0.000955071	0.000983363	0.000486733	0.000670838	0.00103168
K00549	5-methyltetrahydropteroyltriglutamate--homocysteine methyltransferase [EC:2.1.1.14]	3.66952e-05	5.39165e-05	1.26902e-05	8.15864e-05	6.47447e-05	6.03714e-05	0.000177919	1.29686e-05	1.75156e-05	4.91191e-05	3.73665e-05	7.19809e-05	2.89301e-05	1.99362e-05	1.05228e-05	3.18539e-05	1.02546e-05	2.23613e-05	1.23013e-05	1.34943e-05	4.23463e-05	1.84155e-05	8.13663e-05	6.50769e-05	4.6302e-05	5.0475e-05	2.25333e-05	7.72051e-05	4.90001e-05	3.44551e-05	0.00013189	9.93177e-05	4.97754e-05	3.69374e-05	2.88168e-05	2.32657e-05	1.13204e-05	3.67015e-05	1.98589e-05	8.21816e-06	3.49933e-05	4.21372e-05	0.000126957	8.19949e-05	0.000192873	5.45064e-06	5.57538e-05	3.07928e-05
K00554	tRNA (guanine37-N1)-methyltransferase [EC:2.1.1.228]	0.000809247	0.000790927	0.000764833	0.000883457	0.000872677	0.000863055	0.000889647	0.000776676	0.000842798	0.00086351	0.000797748	0.000831143	0.000835831	0.000861492	0.000806523	0.000867433	0.000873162	0.000855501	0.000920344	0.000813365	0.000814452	0.000847705	0.000850157	0.000802124	0.000879007	0.000822446	0.000850934	0.000867797	0.000821957	0.000847495	0.000808082	0.000852365	0.000857861	0.000807574	0.000865066	0.000854939	0.000865355	0.000803397	0.000817933	0.000879233	0.000874833	0.000877813	0.000894143	0.000809176	0.000831649	0.000900934	0.000848418	0.000792041
K00556	tRNA (guanosine-2'-O-)-methyltransferase [EC:2.1.1.34]	1.08271e-05	1.74355e-06	0	3.4235e-07	2.8256e-06	1.7486e-06	6.95052e-07	1.23603e-06	6.24442e-07	3.14204e-07	2.57082e-06	5.83746e-06	4.59851e-06	1.55567e-06	1.43754e-06	2.31421e-06	1.22261e-06	0	0	0	3.29655e-07	2.52144e-06	2.15985e-06	1.67897e-07	9.92128e-07	0	1.04806e-06	0	7.20589e-07	1.32999e-05	1.30356e-06	3.08566e-06	1.46327e-06	0	7.93729e-07	2.39246e-06	0	7.32034e-07	2.8058e-07	1.13044e-05	1.78189e-06	3.1131e-06	2.08282e-06	4.5264e-08	0	8.47348e-06	3.85272e-06	1.71769e-06
K00557	tRNA (uracil-5-)-methyltransferase [EC:2.1.1.35]	3.13312e-06	0	2.86022e-06	4.27938e-06	1.88544e-05	1.03122e-05	1.04275e-05	6.14151e-06	1.21215e-06	3.14204e-07	1.46459e-05	3.42951e-05	2.64115e-05	4.70082e-05	2.49844e-05	4.35132e-05	1.27151e-05	0.000385717	5.03314e-06	9.70506e-07	1.7548e-05	8.64493e-06	7.34349e-06	1.29332e-05	4.50298e-05	2.00758e-05	5.38486e-06	4.1217e-06	1.90956e-05	6.8332e-06	3.27992e-06	2.32689e-06	5.49663e-05	2.12991e-05	0.000203371	6.43463e-05	6.37417e-06	1.64708e-05	2.08876e-06	2.07322e-05	0	3.75127e-05	3.64682e-05	4.5264e-08	7.28746e-06	1.13773e-05	2.60391e-05	4.52465e-06
K00558	DNA (cytosine-5)-methyltransferase 1 [EC:2.1.1.37]	0.00120279	0.00140746	0.00111557	0.000851247	0.000719568	0.000965965	0.000977595	0.00128228	0.00142599	0.00117404	0.000661225	0.00112052	0.000868739	0.00118731	0.000793523	0.000912214	0.000963478	0.00044422	0.000862383	0.000987059	0.000811147	0.000605548	0.00094729	0.00107873	0.000676541	0.000964184	0.0010375	0.000863818	0.000663659	0.000995081	0.00116073	0.000886855	0.000759591	0.00133823	0.000699699	0.000882102	0.000975724	0.00124781	0.00146147	0.001066	0.00116181	0.000487608	0.000615179	0.000972167	0.00129369	0.000935911	0.000995536	0.00111466
K00560	thymidylate synthase [EC:2.1.1.45]	0.000652443	0.000504626	0.000556793	0.000763163	0.000745962	0.000757635	0.000708907	0.000576266	0.000740528	0.000784847	0.000708798	0.000686259	0.000646889	0.00063144	0.000719729	0.000619561	0.000670148	0.000698553	0.000677371	0.000592879	0.000656002	0.000762787	0.000694167	0.000520724	0.000793028	0.000695928	0.000632621	0.000769183	0.000690629	0.000696344	0.000726536	0.000670383	0.000761047	0.000635665	0.000774486	0.000709222	0.000609216	0.000671808	0.00056677	0.000664366	0.000734528	0.000753201	0.000762945	0.000679224	0.000473424	0.000769297	0.000659398	0.000656082
K00561	23S rRNA (adenine-N6)-dimethyltransferase [EC:2.1.1.184]	1.23342e-05	2.00686e-05	1.18025e-05	4.75439e-05	2.84101e-05	5.07093e-05	0.000106997	3.47247e-05	2.57344e-05	5.82175e-05	2.08314e-05	3.45048e-05	5.33314e-05	8.54263e-05	8.42397e-05	0.000153438	0.000120641	7.27549e-05	0.00017081	8.02666e-05	5.40621e-05	7.68679e-05	2.8174e-05	2.79972e-05	0.000108878	8.24565e-05	7.03645e-05	0.000107515	5.91913e-05	5.39267e-05	0.000163584	0.000122485	7.97067e-05	9.71377e-05	9.28957e-05	0.000138941	0.000100455	5.73316e-05	4.87898e-05	0.000119359	1.28524e-05	5.23135e-05	4.90409e-05	1.19626e-05	1.18472e-05	8.04028e-05	8.197e-05	3.84176e-05
K00563	23S rRNA (guanine745-N1)-methyltransferase [EC:2.1.1.187]	0.000218178	9.94978e-05	5.54785e-05	0.000146954	0.000114835	0.000205482	0.000266163	0.000103382	0.000165498	0.00021485	0.000164474	0.000172729	0.000137302	0.000191584	0.000157247	0.000284392	0.000397593	0.000566447	0.000250267	0.000154054	0.000195615	0.000198176	0.000270305	0.000116495	0.000253801	0.000182148	0.000162883	0.000363181	0.00013686	0.000183461	0.000238141	0.00019937	0.000225368	0.000226534	0.00038257	0.000268403	0.000306946	0.000189772	0.000205582	0.000268863	0.000169811	0.000155799	0.000194705	0.000119894	0.000283946	0.000195565	0.000190798	0.000137206
K00564	16S rRNA (guanine1207-N2)-methyltransferase [EC:2.1.1.172]	8.90362e-05	2.36624e-05	2.40653e-05	0.000187501	0.000287569	0.00015975	0.000127626	7.53301e-05	0.000156753	0.000153828	4.27496e-05	8.54982e-05	9.08896e-05	0.00012983	0.00010333	0.000133283	0.000178241	0.000483382	0.000145398	0.000108147	7.79959e-05	0.000131007	0.000159301	8.00703e-05	0.000262306	0.000175127	0.000203287	0.000222462	0.000190647	0.000173705	9.22287e-05	0.000159834	0.000257994	9.86534e-05	0.000345985	0.000186926	0.000140149	7.03668e-05	3.94059e-05	0.000161793	2.94581e-05	0.000342579	0.000188741	6.26469e-05	6.15974e-05	0.00023978	0.000181742	0.000126229
K00566	tRNA-uridine 2-sulfurtransferase [EC:2.8.1.13]	0.00115359	0.000927012	0.0012666	0.00128792	0.00126429	0.00109069	0.00117684	0.00102586	0.000987164	0.00105248	0.00147372	0.000877729	0.00120843	0.000996353	0.00124068	0.00100989	0.000925337	0.00089937	0.000972039	0.00096263	0.001364	0.00136668	0.00113089	0.00114691	0.00113535	0.0010785	0.000969229	0.0011492	0.00120782	0.00119214	0.00106205	0.000935564	0.000968009	0.000900151	0.00106792	0.00101105	0.0010281	0.00107577	0.000914087	0.000980546	0.00119412	0.00127527	0.00133588	0.00126253	0.0011097	0.0010359	0.00103328	0.000926419
K00567	methylated-DNA-[protein]-cysteine S-methyltransferase [EC:2.1.1.63]	0.000833043	0.000644973	0.000626699	0.000840841	0.00110801	0.000953287	0.000662807	0.000743832	0.000917426	0.000982735	0.000868556	0.000928472	0.000760647	0.000602975	0.000661365	0.000637646	0.000683943	0.000771824	0.000546325	0.000687851	0.000673362	0.000778768	0.000801096	0.000767052	0.000769238	0.000768598	0.000852452	0.000761875	0.000917469	0.000791766	0.000850945	0.000970522	0.000888777	0.000670131	0.00075611	0.000683146	0.000704242	0.000674681	0.00052945	0.000721879	0.000634973	0.00106287	0.000779835	0.000778589	0.000818431	0.000863636	0.00089933	0.000817353
K00568	2-polyprenyl-6-hydroxyphenyl methylase / 3-demethylubiquinone-9 3-methyltransferase [EC:2.1.1.222 2.1.1.64]	8.32855e-07	0	5.26018e-07	0	2.4146e-06	3.99039e-06	9.21568e-08	8.88395e-07	9.18297e-07	3.14204e-07	2.64872e-06	5.01657e-06	5.07897e-06	7.10195e-07	0	1.46161e-06	0	0	0	0	3.29655e-07	5.04288e-07	3.02379e-06	1.67897e-07	9.92128e-07	0	3.9754e-07	6.57718e-07	1.64706e-06	6.91273e-08	1.05125e-06	0	0	0	4.70358e-07	5.71333e-07	0	3.32743e-07	0	1.33412e-07	6.44514e-07	3.1131e-06	0	4.5264e-08	0	0	5.93408e-06	1.04737e-06
K00569	thiopurine S-methyltransferase [EC:2.1.1.67]	0	0	0	0	0	0	0	0	0	0	0	9.12103e-08	0	0	0	0	0	0	0	0	0	0	0	0	0	0	0	0	0	0	0	0	0	0	0	0	0	0	0	0	0	0	0	0	0	0	0	0
K00571	site-specific DNA-methyltransferase (adenine-specific) [EC:2.1.1.72]	0.000631621	0.000498655	0.000611398	0.000747294	0.000600542	0.000565155	0.000827047	0.000508857	0.000649362	0.000644199	0.000566741	0.00069131	0.000589408	0.000985306	0.00078479	0.000828185	0.000906234	0.00107512	0.00111419	0.000697023	0.000741535	0.00080994	0.000613685	0.00064571	0.000915911	0.00066251	0.000824588	0.000815088	0.000658825	0.000686504	0.000676724	0.000566824	0.000837816	0.000646895	0.00102158	0.000795234	0.000734961	0.000630065	0.000621777	0.000858691	0.000921137	0.000733817	0.000854542	0.000457611	0.000349045	0.000905123	0.000717676	0.000416373
K00573	protein-L-isoaspartate(D-aspartate) O-methyltransferase [EC:2.1.1.77]	3.54955e-06	0	1.82463e-06	2.67461e-06	4.88058e-06	6.23217e-06	5.22796e-07	8.88395e-07	2.11208e-06	3.14204e-07	4.67422e-06	4.92535e-06	5.55943e-06	1.01456e-06	0	7.91703e-07	0	0	0	0	1.60013e-06	3.81818e-06	3.98372e-06	9.68436e-07	9.92128e-07	0	1.46367e-06	1.31544e-06	2.57353e-06	3.26534e-06	1.05125e-06	0	0	2.37243e-07	4.70358e-07	5.71333e-07	0	3.32743e-07	8.10565e-07	1.33412e-07	2.16102e-06	3.43955e-06	1.13608e-07	4.5264e-08	4.27477e-07	1.90415e-07	8.96754e-06	1.88527e-06
K00574	cyclopropane-fatty-acyl-phospholipid synthase [EC:2.1.1.79]	0.000170309	0.000249793	0.000154222	0.000350652	0.000369421	0.000272915	0.000343602	0.00030527	0.000225369	0.000221985	7.38188e-05	0.000163267	0.00023869	0.000475695	0.000344506	0.000415781	0.00032335	0.00053461	0.000562762	0.00029732	0.000186918	0.000353605	0.000222596	0.000344167	0.00051217	0.000336766	0.000484294	0.000278664	0.000341405	0.000275793	0.000146248	0.000284874	0.000480057	0.000268513	0.00050315	0.000419635	0.000245861	0.000191865	0.00017623	0.000342361	0.000307926	0.000422847	0.000409557	0.000161828	8.26252e-05	0.000478244	0.000472172	0.000375986
K00575	chemotaxis protein methyltransferase CheR [EC:2.1.1.80]	0.000380327	0.000254507	0.000316696	0.000118481	9.80482e-05	0.000261202	0.000233643	0.000180035	0.000402266	0.000269834	0.00019149	0.000238055	0.000249913	0.000245536	0.000190488	0.000293242	0.000371526	0.000185406	0.000283924	0.000331509	0.000245773	0.000132358	0.000294339	0.000130964	0.000139138	0.000224982	0.000197351	0.000206041	0.000111563	0.000240763	0.000227431	0.000280403	0.000171434	0.000338374	0.000109836	0.000233595	0.000359989	0.000340585	0.000529567	0.000333099	0.000199803	0.000128162	6.18786e-05	0.000164102	0.000191754	0.000264776	0.000150654	0.00020559
K00590	site-specific DNA-methyltransferase (cytosine-N4-specific) [EC:2.1.1.113]	0	0	0	0	0	0	0	0	0	0	0	0	0	0	0	0	0	0	0	0	0	0	0	4.50033e-06	0	0	0	0	6.22795e-06	0	0	0	0	0	0	0	0	0	0	0	0	0	0	0	0	0	0	0
K00595	precorrin-6B C5,15-methyltransferase / cobalt-precorrin-6B C5,C15-methyltransferase [EC:2.1.1.132 2.1.1.289 2.1.1.196]	0.000462909	0.000762831	0.000430349	0.000173415	0.000205575	0.000348396	0.000222102	0.000585839	0.000408355	0.000359023	0.000204685	0.000536142	0.000256207	0.000377745	0.000287062	0.000376531	0.00026741	0.000214539	0.000166745	0.000407494	0.000286833	0.000123226	0.000359015	0.000480172	0.000240751	0.000422455	0.000450087	0.000260588	0.000231695	0.000298078	0.000430405	0.000260738	0.000293673	0.000549507	0.000221509	0.0003621	0.000290197	0.000481385	0.000576946	0.000307908	0.000242931	0.000113359	8.29718e-05	0.000303248	0.000387355	0.000199856	0.000382135	0.000518492
K00598	trans-aconitate 2-methyltransferase [EC:2.1.1.144]	2.57788e-06	1.10306e-06	4.33965e-06	0	2.72285e-06	3.99039e-06	8.23124e-06	2.43343e-06	2.20391e-06	1.16704e-06	4.63527e-06	1.36815e-06	8.25002e-06	7.10195e-07	1.26503e-06	8.76963e-06	2.68974e-06	2.25547e-06	3.23811e-06	2.48335e-06	3.29655e-07	6.84391e-07	3.02379e-06	7.7371e-07	9.92128e-07	0	7.9508e-07	6.57718e-07	1.64706e-06	6.91273e-08	2.22866e-06	2.9339e-06	1.68838e-06	2.89963e-06	7.05537e-07	1.32121e-06	2.19371e-06	4.29238e-06	1.13167e-05	7.56889e-06	5.38359e-06	3.1131e-06	0	4.5264e-08	3.58266e-06	0	5.93408e-06	1.04737e-06
K00600	glycine hydroxymethyltransferase [EC:2.1.2.1]	0.000773226	0.000604269	0.000679585	0.000872844	0.00084469	0.000846421	0.000843202	0.000673304	0.000840732	0.00085644	0.000789042	0.000820893	0.000833693	0.000799942	0.00079084	0.000857308	0.000880315	0.000847607	0.000918795	0.000806621	0.000773931	0.000844238	0.000819739	0.000650335	0.000868086	0.000793262	0.000718969	0.000852899	0.000794935	0.000828653	0.000798	0.000838834	0.000836625	0.000793781	0.000860003	0.00085002	0.000863493	0.000795411	0.000804138	0.000876218	0.000866455	0.000869172	0.000872918	0.000795071	0.000821695	0.000888533	0.000727788	0.000752011
K00602	phosphoribosylaminoimidazolecarboxamide formyltransferase / IMP cyclohydrolase [EC:2.1.2.3 3.5.4.10]	0.000867785	0.000810355	0.000933652	0.000788433	0.000751998	0.00082017	0.000874467	0.000806602	0.000708507	0.000774152	0.0010708	0.000799801	0.00085774	0.000750482	0.000929159	0.000813932	0.00086277	0.000853335	0.00066844	0.000764319	0.00095158	0.000916432	0.000804464	0.000862575	0.000785411	0.000834515	0.000692532	0.000914341	0.000874096	0.000885571	0.000862032	0.000726068	0.000685636	0.00080188	0.000852595	0.000842691	0.000791473	0.000867741	0.000849951	0.000796447	0.000748376	0.000784734	0.000816417	0.000911242	0.000888951	0.000699046	0.000790738	0.000726957
K00603	glutamate formiminotransferase / 5-formyltetrahydrofolate cyclo-ligase [EC:2.1.2.5 6.3.3.2]	0.000162397	0.000210302	0.000278231	0.000127055	0.000142641	8.73289e-05	0.000117672	0.000188031	4.87891e-05	6.57135e-05	0.000328062	6.9354e-05	0.000124968	0.000104669	0.000221726	5.32192e-05	8.80126e-05	8.18412e-05	5.88227e-05	0.000100148	0.000267109	0.000214538	0.000132975	0.000291028	0.000115247	0.000120848	0.000169668	0.000119968	0.000234397	0.000157209	0.000126476	9.69326e-05	8.2093e-05	6.02596e-05	9.15654e-05	6.3409e-05	0.000102421	0.000102635	4.74882e-05	6.63768e-05	0.00012459	0.000162378	0.000176301	0.000167052	7.07576e-05	5.78505e-05	0.000163541	6.86972e-05
K00604	methionyl-tRNA formyltransferase [EC:2.1.2.9]	0.000815097	0.000786159	0.000763962	0.000879113	0.000867591	0.00085503	0.000867189	0.000776676	0.00084278	0.000860906	0.000791983	0.000827039	0.000835831	0.000858347	0.000806523	0.000864144	0.000873667	0.000853826	0.000918795	0.000813365	0.000807732	0.000850334	0.000845645	0.000797602	0.000876031	0.000820129	0.000849253	0.000862097	0.000821082	0.00084651	0.000807746	0.000849886	0.000852458	0.000802855	0.000863156	0.000852439	0.000864196	0.000800036	0.000817902	0.000877668	0.000873848	0.000876956	0.000873732	0.000803316	0.000823649	0.000902862	0.000841997	0.000792879
K00605	aminomethyltransferase [EC:2.1.2.10]	0.000279928	0.000181652	0.000345021	0.00030962	0.000346024	0.000294818	0.000248295	0.000223225	0.000220365	0.000265434	0.000519921	0.000276223	0.000434429	0.000151663	0.000287002	0.000153751	0.000101609	5.17307e-05	0.000149947	0.000211913	0.000351984	0.000366389	0.000250786	0.000313135	0.000167051	0.00018933	0.000167229	0.000207634	0.000363842	0.000275882	0.000280857	0.000292504	0.000208343	9.94376e-05	0.000151468	0.000154485	0.000196771	0.000220234	0.000148315	0.000146708	0.000288177	0.000305874	0.000323433	0.000417097	0.000376895	0.000158755	0.000250198	0.000201061
K00606	3-methyl-2-oxobutanoate hydroxymethyltransferase [EC:2.1.2.11]	0.000426233	0.000364191	0.000365783	0.000360324	0.000384324	0.000415045	0.000332528	0.000291304	0.000510791	0.00044923	0.000620378	0.000342807	0.000351453	0.000178927	0.00032594	0.000166598	0.000211547	8.145e-05	9.29987e-05	0.000223002	0.000430994	0.000444842	0.000414911	0.00031426	0.000256631	0.000289594	0.000181359	0.000331943	0.000352776	0.000389285	0.000423911	0.000345761	0.000256612	0.000247662	0.00017938	0.000238621	0.000312127	0.000376041	0.000421939	0.000274967	0.000435057	0.000287879	0.000416592	0.000420451	0.000475561	0.00025478	0.000279861	0.000242768
K00609	aspartate carbamoyltransferase catalytic subunit [EC:2.1.3.2]	0.000809525	0.000786159	0.000765688	0.000868222	0.000863635	0.000854357	0.000864024	0.000776676	0.000840154	0.000858034	0.000791983	0.000829045	0.000833717	0.000862912	0.000806408	0.000860886	0.000870259	0.000853504	0.000905807	0.000811053	0.000808835	0.000839528	0.000840029	0.00080472	0.000867486	0.000827887	0.000852452	0.000859685	0.000822008	0.00084363	0.000807199	0.000846699	0.00084274	0.00081477	0.000859657	0.000852332	0.000861216	0.000817738	0.000817029	0.00087532	0.000870739	0.000871937	0.000864643	0.000797658	0.000828677	0.000890128	0.000844565	0.000798702
K00610	aspartate carbamoyltransferase regulatory subunit	0.000473656	0.000597088	0.000650907	0.000410706	0.000415324	0.000375007	0.000379485	0.000565396	0.000427391	0.000346185	0.000464708	0.000397297	0.000548506	0.000409036	0.000475832	0.000264977	0.000218857	0.000151068	0.000209483	0.000418619	0.00047195	0.000399261	0.000388269	0.000493138	0.000318513	0.00046434	0.000380744	0.000338538	0.000406168	0.000467239	0.000414142	0.000266239	0.000240273	0.000460567	0.000283861	0.000390586	0.000298206	0.000523585	0.000500979	0.000274733	0.000315468	0.00034261	0.000322657	0.000580384	0.000468484	0.00028696	0.000366459	0.000515014
K00611	ornithine carbamoyltransferase [EC:2.1.3.3]	0.000540285	0.00066524	0.000422305	0.000324313	0.000303036	0.000543712	0.000462086	0.000538528	0.000557514	0.000559585	0.000359073	0.000555243	0.000414754	0.000495141	0.000405107	0.000542378	0.000705543	0.000382837	0.000503305	0.000568726	0.000376438	0.000321373	0.000506921	0.000460618	0.000399137	0.000511922	0.000509438	0.000537293	0.000390259	0.000485088	0.000549494	0.000635387	0.000499058	0.000644582	0.000364304	0.000513996	0.000590286	0.000547775	0.000740621	0.000621262	0.000422754	0.000309179	0.000281748	0.000429898	0.00064015	0.000493084	0.00049906	0.000592998
K00612	carbamoyltransferase [EC:2.1.3.-]	0	1.10306e-06	0	0	0	0	0	0	0	0	2.60977e-06	1.36815e-06	0	0	0	0	0	0	0	0	0	0	0	0	0	0	3.9754e-07	0	0	0	3.36402e-07	0	0	1.02805e-06	0	0	0	1.26442e-06	0	0	0	0	0	0	0	0	0	0
K00613	glycine amidinotransferase [EC:2.1.4.1]	2.51839e-06	5.17727e-06	3.66569e-06	7.27495e-07	7.21811e-06	2.42113e-06	1.33498e-06	3.86259e-06	7.89736e-07	1.03238e-06	2.45396e-06	3.28357e-06	0	5.41101e-07	2.8032e-06	3.16681e-06	1.11869e-05	1.51438e-06	2.28779e-06	2.81161e-06	3.39351e-06	6.3036e-07	2.51982e-06	0	2.20829e-06	4.78908e-07	0	0	0	1.04063e-06	8.41004e-07	4.98258e-06	6.92237e-06	7.64448e-07	6.17345e-07	1.16052e-06	4.67715e-06	3.52707e-06	4.03724e-06	1.44085e-06	5.53524e-06	2.32595e-06	2.7834e-06	1.51553e-06	2.30023e-06	4.76038e-06	5.75694e-07	2.15759e-06
K00615		0.00176378	0.00212587	0.00182003	0.0011706	0.00128701	0.00149753	0.00126942	0.00203281	0.00170618	0.00153281	0.00111547	0.00151767	0.00140966	0.00142184	0.00137749	0.00152581	0.00147346	0.000990346	0.00112922	0.00186779	0.00129597	0.00102208	0.00149718	0.00162994	0.0011757	0.00168077	0.0016147	0.00132967	0.00133399	0.0014776	0.00157522	0.00150893	0.00141062	0.00198845	0.0011029	0.00147305	0.00152516	0.00179418	0.00216976	0.00155284	0.00118926	0.00120319	0.00086453	0.00155828	0.00183349	0.00135805	0.00144326	0.00211911
K00616	transaldolase [EC:2.2.1.2]	0.000330643	0.000530465	0.000482573	0.000267368	0.000285038	0.000277612	0.00028517	0.000482263	0.000362413	0.000274985	0.000417857	0.000451781	0.000426801	0.000369409	0.000447529	0.000241249	0.000294568	0.000223734	0.000270355	0.000461318	0.000361384	0.000359188	0.000306375	0.000418769	0.000306352	0.000374418	0.000350242	0.000275639	0.000390611	0.000394766	0.00044692	0.000360743	0.000323263	0.000450161	0.00027538	0.000374348	0.000321668	0.000430262	0.000468665	0.000315711	0.000254163	0.000267173	0.000280101	0.000438302	0.000366327	0.000256461	0.000309406	0.000437792
K00619	amino-acid N-acetyltransferase [EC:2.3.1.1]	2.89516e-06	0	7.72589e-07	2.35366e-07	2.2091e-06	1.05364e-06	4.54324e-06	0	9.36663e-07	0	3.44724e-06	1.59618e-06	1.5615e-06	8.79289e-07	0	0	0	0	4.22362e-07	0	0	2.6295e-06	1.00793e-06	8.00539e-07	0	0	2.94541e-06	7.01566e-07	0	6.50391e-07	1.09331e-06	0	1.38823e-06	0	0	6.42749e-07	0	0	1.87054e-07	5.33647e-07	4.17039e-07	3.87658e-07	1.13608e-07	0	5.49613e-07	1.11869e-06	5.09268e-07	2.76506e-06
K00620	glutamate N-acetyltransferase / amino-acid N-acetyltransferase [EC:2.3.1.35 2.3.1.1]	0.000486992	0.00064929	0.000386125	0.000252526	0.000266612	0.000467211	0.000330542	0.000512997	0.000506344	0.00050507	0.000305446	0.000580908	0.000250906	0.000340623	0.000286587	0.000401219	0.000344246	0.000248507	0.000210107	0.000413017	0.000315051	0.000196219	0.000412415	0.000401816	0.000288275	0.000447892	0.000364725	0.000342894	0.000277925	0.000327327	0.000516706	0.000455163	0.00035007	0.000565158	0.000268778	0.000385151	0.000376179	0.000484687	0.000633966	0.000415992	0.000387391	0.000198818	0.000212409	0.000349974	0.0004818	0.000311742	0.000371721	0.000517891
K00625	phosphate acetyltransferase [EC:2.3.1.8]	0.000777381	0.000735436	0.000761579	0.000829087	0.000822086	0.00082323	0.000772894	0.000751434	0.000821531	0.000833963	0.000761201	0.000777911	0.000817371	0.000833034	0.000815436	0.000848607	0.000815822	0.000776745	0.000854781	0.000784649	0.000771787	0.000832675	0.000774886	0.000773926	0.000845395	0.000780398	0.000801214	0.000801576	0.000768093	0.000782313	0.000781506	0.000799087	0.000867485	0.000768976	0.000844812	0.000829746	0.000798447	0.000775737	0.000793998	0.000825273	0.000804723	0.000849053	0.000792369	0.000757016	0.000666786	0.000833753	0.00083438	0.000793727
K00626	acetyl-CoA C-acetyltransferase [EC:2.3.1.9]	0.00060266	0.000588681	0.000410952	0.000469612	0.000467097	0.000573439	0.000528012	0.000436105	0.0006921	0.000687101	0.000360896	0.000619939	0.000526545	0.000662533	0.000485888	0.000591751	0.000860575	0.000336499	0.000852862	0.000723508	0.000463206	0.0005431	0.000649203	0.000449303	0.000595133	0.000416867	0.000661244	0.00062367	0.000438659	0.00050301	0.000755253	0.000760149	0.000753021	0.00058023	0.000431068	0.00054876	0.000777449	0.000514676	0.000616391	0.000715276	0.000595718	0.000479661	0.000422812	0.000346547	0.000408973	0.000684213	0.000598485	0.000458069
K00627	pyruvate dehydrogenase E2 component (dihydrolipoamide acetyltransferase) [EC:2.3.1.12]	0.000118702	0.000393591	0.00019135	7.83841e-05	0.00013282	0.000177684	0.000165188	0.000235335	0.000120466	0.000147787	0.00013905	0.000260478	8.57189e-05	0.000282567	0.000153893	0.00018417	0.000159668	0.000419468	0.000165003	6.72076e-05	0.000118947	0.000117001	6.9707e-05	0.000407967	0.000166891	0.000137703	0.00036617	0.000117439	0.000234329	0.000114496	0.000166186	0.000227819	0.000231439	8.90187e-05	0.000297521	0.000174714	5.35596e-05	6.53174e-05	0.000114498	0.000169655	8.90692e-05	0.000121748	0.000137561	5.17218e-05	6.40535e-05	0.000169644	0.000409909	0.000165597
K00631	glycerol-3-phosphate O-acyltransferase [EC:2.3.1.15]	8.32855e-07	0	0	0	2.4146e-06	1.7486e-06	9.21568e-08	8.88395e-07	4.77515e-07	3.14204e-07	6.23229e-07	5.01657e-06	4.59851e-06	4.05826e-07	0	5.78552e-07	0	0	0	0	3.29655e-07	0	2.15985e-06	1.67897e-07	9.92128e-07	0	0	0	7.20589e-07	6.91273e-08	1.05125e-06	0	0	0	4.70358e-07	5.71333e-07	0	3.32743e-07	0	1.33412e-07	0	3.1131e-06	0	4.5264e-08	0	0	3.40988e-06	1.04737e-06
K00632	acetyl-CoA acyltransferase [EC:2.3.1.16]	2.681e-05	2.24882e-05	1.05861e-05	0	4.8292e-06	1.57822e-05	1.63221e-05	1.321e-05	1.2364e-05	1.03687e-05	1.37812e-05	3.32279e-05	2.12427e-05	5.24192e-06	1.55254e-06	1.35807e-05	1.38919e-05	7.24971e-07	6.19464e-06	4.42437e-06	2.05884e-06	5.04288e-07	1.67028e-05	6.82665e-06	1.98426e-06	8.42879e-08	5.9631e-06	2.49933e-06	7.77207e-06	8.53239e-06	7.46286e-05	5.7636e-05	1.07738e-05	0	4.82117e-06	1.14267e-06	3.93212e-06	6.65486e-07	1.96406e-05	1.34301e-05	8.60616e-06	6.40126e-06	1.13608e-07	9.05279e-08	1.29872e-05	4.71278e-06	9.34396e-06	1.45794e-05
K00633	galactoside O-acetyltransferase [EC:2.3.1.18]	0.000196038	0.00029138	0.000218785	9.67354e-05	0.00010703	0.000167507	7.93453e-05	0.000194256	0.000266423	0.000239409	0.000144394	0.0002602	0.000101122	0.000239065	0.000120931	0.000176661	0.000110208	0.000456216	0.000102423	0.000122855	0.000154703	4.64546e-05	0.000132727	0.000311902	0.000109124	0.000183843	0.000217978	0.000121429	0.000183785	0.000154323	0.000239532	0.000227698	0.000230314	0.000205175	0.000308574	0.000157759	0.000124365	0.000150849	0.000147793	0.000191671	0.000117548	9.55271e-05	9.02427e-05	0.000152434	0.000169152	0.000127658	0.00023985	0.000144901
K00634	phosphate butyryltransferase [EC:2.3.1.19]	0.000221004	5.71279e-05	0.000260609	0.000134116	0.000124532	0.000109265	0.00014162	9.64295e-05	4.94448e-05	9.30942e-05	0.000342164	8.38268e-05	0.000139478	7.32008e-05	0.000233614	6.6975e-05	0.000170096	0.000139243	0.000127465	0.000165814	0.000271481	0.000239321	0.000168516	0.000151432	0.000113215	0.000129006	0.000100812	0.000137068	0.000215199	0.000186049	0.000152114	0.000167329	0.000101609	6.69024e-05	9.6291e-05	7.17201e-05	0.000157657	0.00011859	4.61555e-05	0.000108917	0.000123785	0.000167081	0.000206445	0.00016879	8.50272e-05	0.000126055	6.12007e-05	4.31936e-05
K00635	diacylglycerol O-acyltransferase / wax synthase [EC:2.3.1.20 2.3.1.75]	0	0	0	0	0	0	0	0	0	0	0	9.12103e-08	0	0	0	0	0	0	0	0	0	0	0	0	0	0	0	0	0	0	0	0	0	0	0	0	0	0	0	0	0	0	0	0	0	0	0	0
K00638	chloramphenicol O-acetyltransferase type B [EC:2.3.1.28]	2.22095e-06	3.34476e-06	2.11229e-05	8.75133e-06	0	2.69015e-06	4.2418e-06	4.24885e-06	8.65036e-06	0	1.75283e-06	0	3.26715e-06	6.42557e-07	1.01778e-05	1.17233e-06	1.02546e-05	0	1.02071e-06	1.87536e-05	2.55767e-06	2.73756e-06	0	4.50033e-06	2.40031e-06	8.81191e-07	3.7947e-06	4.82327e-07	1.28162e-05	5.0173e-07	0	9.20638e-06	3.50246e-05	3.585e-06	1.76384e-06	2.67812e-06	8.48509e-07	2.21274e-06	2.39896e-05	1.40527e-06	8.34077e-07	4.52948e-06	4.92302e-07	4.5264e-06	2.01525e-05	3.42747e-06	7.66116e-06	2.00048e-05
K00639	glycine C-acetyltransferase [EC:2.3.1.29]	0.000203455	9.8018e-05	0.000222955	0.000138324	0.000227238	0.000273409	0.000136372	0.000112318	0.000158453	0.000281879	0.000516104	0.000509368	0.000172368	7.20057e-05	0.000233811	0.000120882	5.54961e-05	4.73325e-05	2.191e-05	0.000102146	0.000242122	0.000243619	0.00013399	0.000241498	0.000122459	0.000144312	8.75672e-05	0.00011616	0.000315044	0.000172163	0.000257301	0.000301714	0.000221778	5.24438e-05	0.000129682	9.80907e-05	5.54015e-05	0.00011859	0.000108455	0.000141639	0.000228998	0.000186251	0.000256849	0.00020597	0.000153898	0.000117193	0.000192621	8.87895e-05
K00640	serine O-acetyltransferase [EC:2.3.1.30]	0.000833916	0.000687666	0.000909291	0.000676884	0.000696205	0.000709022	0.000686708	0.000778752	0.000675301	0.000692684	0.0010396	0.000739921	0.000765395	0.000523682	0.000737536	0.000574137	0.000623149	0.000413744	0.000406153	0.000677016	0.000896069	0.000775286	0.000771202	0.000796152	0.000505151	0.000691877	0.000552562	0.000731978	0.000752729	0.000770743	0.000819141	0.000675635	0.000496763	0.000696992	0.000478719	0.000542741	0.000718032	0.000788248	0.000751155	0.000563931	0.000723189	0.000650033	0.0007154	0.000911687	0.000886712	0.000519485	0.000601127	0.000689755
K00641	homoserine O-acetyltransferase/O-succinyltransferase [EC:2.3.1.31 2.3.1.46]	4.00365e-05	2.98655e-05	3.8738e-06	1.0021e-05	4.68705e-05	9.91319e-05	1.52274e-05	9.99135e-06	5.71585e-05	0.000111169	0.00010302	0.0001653	1.35812e-05	3.66359e-06	1.28133e-05	1.92344e-05	1.5842e-06	7.52359e-06	0	9.70506e-07	6.92076e-06	1.92591e-05	1.89265e-05	4.74049e-05	6.42227e-06	1.37236e-05	2.36898e-05	5.45161e-06	6.49905e-05	2.22248e-05	6.82929e-05	0.000144253	7.82089e-05	0	1.42774e-05	1.82112e-06	4.55298e-07	3.99291e-07	2.3122e-05	4.4186e-05	5.53649e-05	1.82403e-05	4.0293e-05	2.22953e-05	4.02573e-05	3.69248e-05	6.89429e-05	2.72598e-05
K00643	5-aminolevulinate synthase [EC:2.3.1.37]	0	0	5.26018e-07	0	0	2.24179e-06	0	0	4.40783e-07	0	2.02549e-06	0	4.80463e-07	3.04369e-07	0	0	0	0	0	0	0	5.04288e-07	8.6394e-07	0	0	0	3.9754e-07	6.57718e-07	9.26472e-07	0	0	0	0	0	0	0	0	0	0	0	6.44514e-07	0	0	0	0	0	2.5242e-06	0
K00645	[acyl-carrier-protein] S-malonyltransferase [EC:2.3.1.39]	0.000740388	0.000785812	0.000723113	0.000614968	0.000593675	0.000704785	0.000657381	0.000717183	0.00067228	0.000699787	0.000747909	0.000737299	0.000696761	0.000583501	0.000636851	0.000640169	0.000714559	0.000417794	0.000542963	0.000671321	0.000699407	0.000626422	0.000705267	0.000685862	0.000546796	0.000682117	0.000596689	0.000731046	0.000648449	0.000710913	0.000752796	0.000676318	0.000519987	0.000708743	0.000481357	0.000647072	0.000694412	0.00073971	0.000776766	0.000658633	0.000621956	0.000566391	0.000556102	0.000774985	0.000815792	0.000578013	0.000629034	0.000689482
K00647	3-oxoacyl-[acyl-carrier-protein] synthase I [EC:2.3.1.41]	1.74503e-06	0	0	8.55876e-08	4.8292e-06	5.78382e-06	6.51988e-07	4.90549e-06	9.55029e-07	3.14204e-07	4.2068e-06	5.01657e-06	8.58635e-06	8.11652e-07	2.01255e-07	1.1571e-06	0	2.57767e-07	0	0	5.77933e-06	4.35849e-06	8.83138e-06	5.57348e-07	4.19254e-06	3.67802e-06	0	0	6.38236e-06	4.41746e-06	4.87782e-06	0	0	0	2.70456e-06	3.35658e-06	0	1.86336e-06	0	1.33412e-07	4.17039e-07	6.05114e-06	6.28632e-06	3.48048e-06	2.48344e-06	0	8.81255e-06	2.22043e-06
K00648	3-oxoacyl-[acyl-carrier-protein] synthase III [EC:2.3.1.180]	0.00084274	0.000839177	0.00084644	0.000793055	0.000760796	0.000820103	0.000791336	0.00080496	0.000777318	0.000791579	0.000860959	0.000773503	0.000879385	0.000683174	0.000702654	0.000736665	0.000741686	0.000810406	0.000554024	0.000678886	0.000820036	0.000751485	0.000841517	0.00079744	0.00061983	0.000769765	0.000682729	0.000819772	0.000764168	0.000818051	0.00081074	0.000697369	0.000593165	0.00075828	0.000700625	0.000754446	0.000751531	0.000850139	0.00081526	0.000706163	0.000671081	0.000697378	0.000686326	0.000933803	0.000946976	0.000667449	0.000748933	0.000809679
K00651	homoserine O-succinyltransferase/O-acetyltransferase [EC:2.3.1.46 2.3.1.31]	0.000688702	0.000744337	0.000724138	0.000609184	0.000559635	0.000599645	0.000669263	0.000708321	0.000608482	0.000578775	0.00065675	0.000604002	0.000700645	0.000638716	0.000656597	0.000663561	0.000632971	0.000737669	0.000560562	0.000657171	0.00068045	0.000623237	0.000646203	0.000646495	0.000595045	0.00067279	0.000571951	0.000658694	0.000578363	0.000635691	0.000675957	0.000516105	0.000498095	0.000725804	0.00066111	0.000710149	0.000666183	0.000742205	0.000748672	0.000630269	0.000563824	0.000548956	0.000556992	0.000713933	0.000747545	0.000554203	0.000596891	0.000645339
K00652	8-amino-7-oxononanoate synthase [EC:2.3.1.47]	0.00047904	0.00026061	0.000629392	0.000598307	0.000601997	0.000443706	0.000443478	0.000365369	0.000312653	0.00040275	0.000894538	0.000276333	0.000559757	0.000206238	0.000495452	0.000222025	0.000119306	0.000120812	0.000116422	0.000216209	0.000675914	0.000650123	0.000456512	0.000508553	0.000311854	0.000354057	0.000246068	0.00039846	0.000585539	0.000486525	0.000407638	0.000312009	0.00024706	0.000138747	0.000253961	0.000225846	0.000285865	0.000374569	0.000174846	0.000193767	0.000468015	0.000535398	0.000586805	0.000663331	0.00046924	0.00026484	0.000357432	0.000286306
K00655	1-acyl-sn-glycerol-3-phosphate acyltransferase [EC:2.3.1.51]	0.00102848	0.00129908	0.000993142	0.000992595	0.000984442	0.00104452	0.000981222	0.0011635	0.00109823	0.00105948	0.000861593	0.00113179	0.000981748	0.00108225	0.0010046	0.000999731	0.00105878	0.00102289	0.00104185	0.00112297	0.000955757	0.000933398	0.00102909	0.00102658	0.00104944	0.00111369	0.00111655	0.00100638	0.00100234	0.00107804	0.00103483	0.00104688	0.00105702	0.0011697	0.00102425	0.00110096	0.0010285	0.00110285	0.00112785	0.00106103	0.00100102	0.000952498	0.000960188	0.00102014	0.00103165	0.00107441	0.00104004	0.00113012
K00656	formate C-acetyltransferase [EC:2.3.1.54]	0.000898353	0.00109279	0.000958334	0.000567489	0.000602164	0.000772734	0.000681078	0.0010255	0.000554416	0.00079232	0.000779758	0.00107855	0.000718522	0.000721727	0.000764477	0.000731732	0.000832602	0.00104181	0.000552827	0.000971162	0.000787194	0.000525177	0.000850817	0.000913378	0.000639344	0.000949702	0.000782476	0.000849951	0.000778322	0.000682388	0.000878117	0.000855619	0.000764881	0.00100953	0.000784606	0.000797395	0.000833974	0.000885637	0.00100225	0.000763248	0.000636429	0.000588378	0.000545319	0.000880375	0.000958254	0.000585896	0.000726599	0.00101333
K00657	diamine N-acetyltransferase [EC:2.3.1.57]	0.000352605	0.000338239	0.000453962	0.00056057	0.000560341	0.000330171	0.000415362	0.000361335	0.000332629	0.000313811	0.000443556	0.000119194	0.000414529	0.000389252	0.000411675	0.000306419	0.000221501	8.32992e-05	0.000411565	0.000293942	0.00046314	0.000561525	0.000364859	0.000494425	0.000425623	0.000321374	0.000465673	0.000331358	0.00047308	0.000400546	0.000285048	0.000282623	0.000377162	0.000158564	0.000276093	0.000267366	0.000296592	0.000260521	0.000168964	0.000281164	0.000479345	0.000554812	0.000573106	0.000417151	0.000266145	0.000442727	0.00044941	0.000308996
K00658		0.000156497	5.66414e-05	0.000196216	0.000128196	0.000166085	0.00018293	0.000118393	9.55863e-05	9.37802e-05	0.000164291	0.000407662	0.00019394	0.000136542	4.38911e-05	0.000212099	6.30521e-05	1.92356e-05	2.61634e-05	1.80384e-05	6.36395e-05	0.000237474	0.000225909	0.00011636	0.000184638	0.000115844	0.000107762	5.13007e-05	0.000110401	0.000226891	0.000127602	0.000169234	0.00016952	0.00013477	3.1316e-05	0.000105909	5.50622e-05	5.0745e-05	9.48317e-05	4.60361e-05	6.54696e-05	0.000173728	0.000168296	0.000215647	0.000173692	0.00010729	5.71565e-05	0.000124542	6.39806e-05
K00661	maltose O-acetyltransferase [EC:2.3.1.79]	0.00103935	0.000810467	0.00094214	0.000925694	0.00110706	0.00112503	0.00088947	0.00101255	0.00109052	0.0010587	0.00126208	0.00107717	0.000837961	0.000793499	0.00103812	0.000944604	0.000782761	0.00134654	0.000688661	0.000868063	0.00101527	0.000939678	0.000921151	0.000951738	0.00102016	0.00107456	0.000894844	0.000996563	0.0011205	0.00103991	0.000882625	0.000968731	0.00106982	0.000920356	0.00123304	0.00099329	0.000782326	0.000909883	0.000766213	0.000899933	0.000902509	0.00104914	0.00101675	0.00098578	0.00098799	0.000924077	0.00102471	0.00105715
K00662	aminoglycoside 3-N-acetyltransferase [EC:2.3.1.81]	4.29912e-05	0.000135581	4.8706e-05	0.000154892	2.07039e-05	7.07509e-05	0.000129063	3.63469e-05	5.87773e-05	8.99521e-05	2.14948e-05	4.72319e-05	8.8309e-05	0.000178969	9.97363e-05	0.000149617	0.000215638	7.60575e-05	0.000304628	0.000111618	0.000128836	0.000108134	0.000151333	8.86651e-05	0.000162101	7.73533e-05	0.000120888	0.000152306	5.47648e-05	9.22627e-05	4.17558e-05	0.000110919	0.00012974	3.65354e-05	9.98702e-05	0.000100233	0.000146916	3.87536e-05	3.36643e-05	0.000144245	0.000240897	6.59835e-05	0.000173063	4.49407e-05	4.23406e-05	0.000159607	6.25439e-05	3.91508e-05
K00663	aminoglycoside 6'-N-acetyltransferase [EC:2.3.1.82]	0	0	0	0	0	0	0	0	0	0	0	0	0	0	0	0	3.97348e-07	1.44994e-06	0	5.70886e-07	0	0	1.4399e-06	0	0	0	5.7824e-07	0	7.20589e-07	0	0	0	0	0	0	0	9.10595e-07	0	0	0	0	0	0	0	0	0	0	0
K00666	fatty-acyl-CoA synthase [EC:6.2.1.-]	0.000171072	5.62027e-05	0.000220681	0.000173422	0.000171	0.000101822	0.00016942	0.000129474	7.52453e-05	7.37257e-05	0.000341491	2.94609e-05	0.00014141	5.42961e-05	0.000213182	8.0845e-05	5.5751e-05	4.45686e-05	1.78448e-05	8.44198e-05	0.000238076	0.000246903	0.000155917	0.000171202	0.000130113	9.68161e-05	6.00646e-05	0.000110431	0.000206475	0.000146296	0.000101774	4.02567e-05	9.59317e-05	6.34097e-05	9.62029e-05	6.69709e-05	5.87885e-05	0.000122699	4.19729e-05	4.77464e-05	0.000146817	0.000183599	0.000264006	0.000168755	0.000419904	4.09474e-05	7.44638e-05	7.00273e-05
K00673	arginine N-succinyltransferase [EC:2.3.1.109]	1.66571e-06	0	0	0	4.8292e-06	3.49719e-06	1.84314e-07	1.77679e-06	9.55029e-07	6.28408e-07	0	0	8.33218e-06	8.11652e-07	0	1.1571e-06	0	0	0	0	6.59311e-07	0	4.3197e-06	3.35794e-07	1.98426e-06	0	0	0	1.44118e-06	1.38255e-07	2.10251e-06	0	0	0	9.40715e-07	1.14267e-06	0	6.65486e-07	0	2.66823e-07	0	6.2262e-06	0	9.05279e-08	0	0	6.81976e-06	2.09475e-06
K00674	2,3,4,5-tetrahydropyridine-2,6-dicarboxylate N-succinyltransferase [EC:2.3.1.117]	3.20451e-05	2.42851e-05	2.92269e-05	8.18003e-05	4.75599e-05	6.6839e-05	0.000173661	1.46199e-05	3.30587e-05	5.46378e-05	4.19414e-05	6.62757e-05	5.21163e-05	0.000116117	9.03061e-05	0.00012665	0.000300456	0.00014091	0.000197304	0.000102945	7.0348e-05	0.000121777	0.00011218	7.97782e-05	0.000111798	9.44982e-05	0.000151345	0.000234992	0.000140438	0.000161273	5.28991e-05	0.000116306	0.000108488	6.58282e-05	7.68153e-05	0.000117641	0.000151386	4.56606e-05	5.76982e-05	0.000157346	2.52972e-05	7.30548e-05	0.000114328	6.80423e-05	4.35416e-05	0.000173694	0.000119479	6.63511e-05
K00675	N-hydroxyarylamine O-acetyltransferase [EC:2.3.1.118]	8.32855e-07	1.10306e-06	0	0	2.4146e-06	1.7486e-06	9.21568e-08	8.88395e-07	4.77515e-07	3.14204e-07	2.60977e-06	1.36815e-06	4.16609e-06	4.05826e-07	0	7.03398e-06	1.98674e-07	7.24971e-07	0	2.85443e-07	3.29655e-07	0	2.8798e-06	1.67897e-07	9.92128e-07	0	6.8666e-07	0	1.4978e-05	6.91273e-08	1.38766e-06	0	0	1.02805e-06	9.40715e-07	5.71333e-07	4.55298e-07	1.59717e-06	0	1.33412e-07	0	3.1131e-06	0	1.36245e-05	0	0	3.40988e-06	1.04737e-06
K00677	UDP-N-acetylglucosamine acyltransferase [EC:2.3.1.129]	0.000476948	0.000258306	0.000629753	0.000594798	0.000599942	0.000441767	0.000435878	0.000365465	0.000310127	0.000395052	0.000881947	0.00024474	0.00055464	0.000203195	0.000490449	0.00021853	6.733e-05	6.26858e-05	7.76441e-05	0.000185552	0.000669069	0.000653041	0.000437337	0.000506996	0.000312766	0.000353185	0.000224953	0.000389406	0.000562712	0.000472402	0.000393961	0.000257239	0.000225393	0.000126595	0.000253675	0.000221391	0.000238742	0.000371191	0.000173872	0.000169958	0.000468631	0.000529063	0.000590497	0.000663695	0.000470482	0.00024831	0.000359668	0.000282169
K00680	uncharacterized N-acetyltransferase [EC:2.3.1.-]	0.000184933	0.000268678	0.00010522	5.2294e-05	8.88265e-05	0.000115564	6.15013e-05	0.000184159	0.000126535	0.000155138	0.000144719	0.000150881	8.74303e-05	0.000205196	0.00010426	0.00014176	0.000199316	0.000825782	8.48243e-05	9.93079e-05	0.000136638	0.000135149	0.000166116	0.000193817	0.00017047	0.000113501	0.000176923	0.000139721	0.00011478	7.38421e-05	0.000161391	0.000125618	0.000201778	0.000130813	0.000467844	0.000196646	0.000188196	0.000121948	7.76793e-05	0.000148117	0.000169223	9.37027e-05	0.000138602	8.69109e-05	8.59636e-05	0.000118414	0.000224712	7.76313e-05
K00681	gamma-glutamyltranspeptidase / glutathione hydrolase [EC:2.3.2.2 3.4.19.13]	9.74639e-06	8.56651e-06	1.40052e-05	9.50022e-06	1.60288e-05	2.72041e-05	1.44212e-05	1.64932e-05	1.47791e-05	2.26451e-05	2.87094e-05	4.54387e-05	2.24818e-05	1.33753e-05	8.46709e-06	9.21877e-06	5.48646e-05	5.79816e-05	4.56415e-05	4.20743e-05	1.62477e-05	3.74614e-06	4.11091e-05	1.98733e-05	7.80901e-06	1.62043e-05	2.80898e-05	2.19897e-05	4.46508e-05	1.91111e-05	4.60534e-05	7.88689e-05	3.37545e-05	1.71342e-05	4.60804e-06	1.21676e-05	5.42011e-05	8.76777e-06	2.40831e-06	2.87369e-05	7.592e-06	1.77029e-05	1.13608e-06	3.30346e-06	9.24164e-06	1.84822e-05	2.93161e-05	1.51345e-05
K00683	glutaminyl-peptide cyclotransferase [EC:2.3.2.5]	2.73256e-05	2.79797e-05	2.57519e-06	9.44331e-06	4.39935e-05	9.66211e-05	9.431e-06	9.02571e-06	5.49876e-05	0.000105782	9.79638e-05	0.000162628	1.28605e-05	2.20938e-06	1.13758e-05	1.74988e-05	1.62913e-07	6.79862e-06	0	0	6.92076e-06	1.36039e-05	1.63347e-05	4.66043e-05	6.42227e-06	1.36393e-05	1.91903e-05	4.5308e-06	6.37037e-05	8.47367e-06	4.50496e-05	0.000125972	7.30631e-05	0	1.3954e-05	0	0	0	2.28414e-05	3.30149e-05	5.25215e-05	1.79547e-05	3.80966e-05	2.22953e-05	3.97077e-05	2.76421e-05	6.54666e-05	2.38244e-05
K00684	leucyl/phenylalanyl-tRNA---protein transferase [EC:2.3.2.6]	3.16088e-05	3.06128e-05	3.46284e-06	9.44331e-06	4.83603e-05	0.00010236	1.5143e-05	1.08025e-05	5.78895e-05	0.000108206	0.00010108	0.000168283	1.79395e-05	2.91958e-06	1.16921e-05	1.88081e-05	1.43299e-05	9.53739e-06	0	0	9.45703e-06	4.5266e-05	2.98218e-05	4.67722e-05	8.53454e-06	1.66085e-05	2.48282e-05	1.17657e-05	7.53875e-05	1.65891e-05	4.72362e-05	0.000134268	7.53893e-05	3.03143e-07	1.44244e-05	5.71333e-07	8.19536e-06	3.32743e-07	2.54602e-05	3.71685e-05	5.49479e-05	2.10678e-05	6.92631e-05	4.22648e-05	3.97077e-05	4.72311e-05	7.38585e-05	2.68827e-05
K00685	arginyl-tRNA---protein transferase [EC:2.3.2.8]	0	0	5.26018e-07	0	0	2.24179e-06	0	0	4.40783e-07	0	2.02549e-06	0	4.80463e-07	3.04369e-07	0	0	0	0	0	0	0	5.04288e-07	8.6394e-07	0	0	0	3.9754e-07	6.57718e-07	9.26472e-07	0	0	0	0	0	0	0	0	0	0	0	6.44514e-07	0	0	0	0	0	2.5242e-06	0
K00686	protein-glutamine gamma-glutamyltransferase [EC:2.3.2.13]	2.73652e-06	0	5.22731e-06	1.88293e-06	3.23659e-06	5.82865e-07	6.15814e-06	0	3.96704e-06	9.42612e-07	0	0	0	1.45421e-06	1.58129e-06	0	2.79672e-06	1.27273e-06	2.63976e-06	3.28259e-06	3.84487e-06	2.16123e-07	1.72788e-06	1.2549e-06	0	1.45588e-06	1.4456e-06	0	3.60295e-07	3.79085e-06	0	0	0	1.34437e-06	5.87947e-07	0	1.44867e-06	9.3168e-07	1.43408e-06	2.31247e-06	4.2083e-06	6.12092e-07	0	6.46628e-07	0	2.66581e-06	0	2.26232e-06
K00687	penicillin-binding protein 2B	0	0	0	0	4.57233e-06	0	0	0	0	6.19431e-07	0	9.57708e-07	9.12879e-07	0	0	1.26672e-06	1.74222e-06	0	1.58386e-06	1.2274e-06	0	0	0	0	0	0	0	7.01566e-07	0	4.83148e-07	1.05125e-06	1.66929e-06	4.12716e-07	1.29165e-06	5.87947e-07	9.99832e-08	0	0	4.67634e-07	0	0	0	0	6.06214e-07	8.54954e-07	0	4.87126e-07	0
K00688	glycogen phosphorylase [EC:2.4.1.1]	0.00098499	0.00110874	0.000984561	0.000729798	0.000721713	0.000881001	0.000779254	0.00100722	0.000966297	0.000897578	0.000836789	0.00106575	0.000863852	0.000751553	0.000789512	0.000738758	0.000795491	0.000950279	0.000527855	0.000928351	0.000825946	0.000629366	0.0009216	0.000799885	0.000660851	0.000932597	0.000678447	0.000799635	0.000730416	0.000881862	0.000960085	0.000830281	0.000679622	0.00108332	0.000767908	0.000850412	0.000836775	0.00104832	0.00117707	0.000802385	0.000729397	0.000632366	0.000611373	0.000942229	0.00118147	0.000704747	0.000662852	0.00103659
K00689	dextransucrase [EC:2.4.1.5]	0	0	0	0	3.13384e-06	0	0	0	0	3.5909e-07	0	9.57708e-07	9.12879e-07	0	0	0	1.74222e-06	0	1.58386e-06	1.2274e-06	0	0	0	0	0	0	0	7.01566e-07	0	4.83148e-07	1.05125e-06	1.66929e-06	4.12716e-07	1.29165e-06	5.87947e-07	0	0	0	4.67634e-07	0	0	0	0	6.06214e-07	8.54954e-07	0	4.87126e-07	0
K00690	sucrose phosphorylase [EC:2.4.1.7]	6.36242e-05	0.000181439	2.38681e-05	8.28916e-05	7.31444e-05	0.000152173	0.000169004	0.000162547	4.18101e-05	8.40945e-05	3.08237e-05	7.17104e-05	8.9294e-05	0.00011752	0.000168896	0.000178727	0.000150228	0.000108391	0.000168839	0.000138699	5.36609e-05	0.00012736	8.72459e-05	3.47802e-05	0.000223109	0.000192818	0.000107643	0.000148524	0.000113905	0.000143941	5.74721e-05	9.06095e-05	0.000108441	0.000218639	0.000155703	0.000256734	8.09602e-05	0.000177091	0.000206377	0.000130592	4.34478e-05	7.64605e-05	9.4219e-05	0.000111463	5.13583e-05	0.000142637	0.000135436	0.000230401
K00691	maltose phosphorylase [EC:2.4.1.8]	7.89626e-05	1.22404e-05	7.63713e-05	0.000436796	0.000307836	0.000204989	0.000403337	6.45052e-05	0.000217967	0.00022523	6.78541e-05	0.000145161	0.000238982	0.000538193	0.000328707	0.00046286	0.000384877	0.000485892	0.000793336	0.00025717	0.000201137	0.000401467	0.000193475	0.000209049	0.000529733	0.000207923	0.000406611	0.000278544	0.000259464	0.000224664	0.000111391	0.000268288	0.000493167	0.000150517	0.000523104	0.000365146	0.000292094	0.000113898	0.000103628	0.000421723	0.000501697	0.000403083	0.000536287	9.80854e-05	1.05444e-05	0.000543683	0.000346524	0.000119065
K00692	levansucrase [EC:2.4.1.10]	7.74952e-05	7.61468e-06	5.79935e-05	0.000331566	0.000303109	0.000210414	0.000363761	6.34237e-05	0.000194826	0.000204412	5.14164e-05	8.61025e-05	0.000170228	0.000375761	0.000272672	0.000346035	0.000366599	7.71047e-05	0.000561107	0.000196998	0.000116015	0.000352443	0.000128583	0.000146823	0.000417942	0.000203555	0.000344992	0.000282315	0.000263993	0.000228678	9.00715e-05	0.000207232	0.00035063	0.000146115	0.000257293	0.000306127	0.000222268	0.000113798	0.000136892	0.000355266	0.000271416	0.00036195	0.00036152	6.59561e-05	3.25697e-06	0.000451808	0.000338685	0.000123758
K00694	cellulose synthase (UDP-forming) [EC:2.4.1.12]	2.49856e-06	1.54073e-07	0	0	8.68229e-06	5.24579e-06	2.33751e-06	2.66519e-06	2.02025e-06	5.47613e-06	5.8751e-06	2.18754e-05	1.45302e-05	2.97606e-06	0	2.86231e-06	0	0	0	4.37584e-07	6.59311e-07	0	6.47955e-06	5.0369e-07	2.97639e-06	0	0	0	2.16177e-06	1.38255e-07	5.26889e-05	3.19188e-05	3.78948e-06	0	1.41107e-06	1.714e-06	0	1.07043e-06	9.76731e-07	4.00235e-07	0	9.16424e-06	0	1.35792e-07	0	6.10757e-07	1.051e-05	3.14212e-06
K00697	trehalose 6-phosphate synthase [EC:2.4.1.15 2.4.1.347]	8.32855e-07	0	5.26018e-07	0	2.4146e-06	3.99039e-06	3.75259e-06	8.88395e-07	9.18297e-07	3.14204e-07	1.94759e-07	9.12103e-08	4.64655e-06	4.05826e-07	0	5.78552e-07	0	0	0	0	3.29655e-07	5.04288e-07	4.03172e-06	1.67897e-07	9.92128e-07	0	2.92734e-06	9.20805e-07	1.64706e-06	6.91273e-08	1.05125e-06	0	1.38823e-06	0	4.70358e-07	5.71333e-07	0	3.32743e-07	0	1.33412e-07	6.44514e-07	3.1131e-06	1.13608e-07	4.5264e-08	1.22136e-07	6.18849e-07	5.93408e-06	2.97454e-06
K00700	1,4-alpha-glucan branching enzyme [EC:2.4.1.18]	0.000970028	0.00113081	0.00100437	0.000686555	0.000703578	0.000817031	0.000728842	0.00105148	0.000772233	0.000830954	0.000801917	0.000831215	0.000796049	0.000776629	0.000744905	0.000693621	0.000684555	0.000874125	0.000487493	0.000827561	0.000818854	0.000630735	0.000868011	0.000932266	0.000618606	0.000877494	0.00073543	0.000764447	0.000731523	0.000803709	0.000874889	0.000756086	0.000630227	0.000950434	0.000746749	0.00075773	0.000776076	0.000926617	0.00100041	0.000720781	0.000752818	0.000609859	0.000642539	0.000920254	0.00119751	0.000606838	0.000755716	0.00100248
K00702	cellobiose phosphorylase [EC:2.4.1.20]	0.00012827	2.50886e-05	7.43165e-05	5.60813e-05	2.85257e-05	4.6405e-05	0.000121763	1.9284e-05	4.78708e-05	4.69286e-05	3.54201e-05	2.17272e-05	1.89783e-05	4.43365e-05	3.46254e-05	2.57303e-05	5.67138e-05	7.74011e-06	1.5293e-05	2.12678e-05	3.83149e-05	3.01582e-05	7.70226e-05	3.6338e-05	2.2923e-05	3.88778e-05	4.36752e-05	3.66678e-05	1.01912e-05	4.15507e-05	9.93436e-06	1.43827e-05	2.13802e-05	4.4371e-05	1.22954e-05	1.46493e-05	2.17231e-05	7.77177e-05	4.13285e-05	6.36313e-05	2.70317e-05	1.87198e-05	5.17674e-05	9.80046e-06	0.000191001	7.22864e-05	1.51598e-05	4.07428e-05
K00703	starch synthase [EC:2.4.1.21]	0.000745048	0.000780836	0.000711974	0.000583329	0.000571644	0.000602896	0.000644307	0.000731101	0.000613352	0.000575714	0.000658639	0.000592179	0.000690651	0.000542372	0.000580446	0.000619564	0.000602691	0.000815076	0.000436212	0.000637083	0.000747708	0.000584506	0.000750608	0.00064432	0.000524308	0.000701687	0.000519693	0.000698891	0.000548561	0.000668985	0.000674361	0.000533523	0.000432724	0.000764508	0.000623665	0.000636877	0.000726096	0.000779971	0.000723679	0.000580121	0.00056982	0.000542233	0.000579865	0.000759924	0.00095306	0.000474023	0.000504573	0.00069245
K00705	4-alpha-glucanotransferase [EC:2.4.1.25]	0.000764541	0.000813548	0.000704686	0.000540828	0.00058846	0.00069927	0.000596075	0.000826822	0.000808588	0.000677263	0.000729687	0.000700674	0.000586303	0.000484615	0.000600797	0.000549409	0.000409686	0.000402125	0.000303256	0.000615175	0.000678277	0.000524033	0.000683044	0.000659682	0.000522121	0.000728966	0.000516115	0.00058944	0.000594096	0.000684005	0.000705353	0.00059946	0.000495237	0.000781629	0.000466717	0.000599622	0.000555256	0.000757029	0.000720182	0.000505369	0.000606772	0.000459866	0.000492652	0.000737824	0.000765594	0.000447984	0.000544252	0.000875621
K00712	poly(glycerol-phosphate) alpha-glucosyltransferase [EC:2.4.1.52]	1.24532e-05	7.82817e-07	3.00817e-05	0.000115115	6.49887e-05	8.8999e-05	0.000225982	1.65319e-05	3.74886e-05	5.56141e-05	3.94114e-05	6.9484e-05	9.15762e-05	0.000254487	0.000190042	0.000255964	0.000275607	0.000424865	0.000311984	9.97195e-05	4.21263e-05	0.000183651	1.86227e-05	7.79335e-05	0.000243039	0.000111268	0.000163461	0.000198894	0.000148081	0.000130636	6.60167e-05	7.21032e-05	0.000195183	0.000109738	0.000339892	0.00027199	9.81787e-05	7.96254e-05	0.000106371	0.000240497	3.14675e-05	0.000131681	0.000158351	1.47512e-05	8.14242e-06	0.000233401	0.00021469	3.12955e-05
K00721	dolichol-phosphate mannosyltransferase [EC:2.4.1.83]	0.000528337	0.000495022	0.000686355	0.000559843	0.000527372	0.000398119	0.000447563	0.000583627	0.0003152	0.000371838	0.000544221	0.000145849	0.000529158	0.000395821	0.000421486	0.000254243	0.000124686	0.000136564	0.000119634	0.000270769	0.000548317	0.000475372	0.000468483	0.000579688	0.000307664	0.00043323	0.000395317	0.000393217	0.000475615	0.000480057	0.000401527	0.000201908	0.000201005	0.000322446	0.000280605	0.00031401	0.000269543	0.000462657	0.000247976	0.000213639	0.00039534	0.000423619	0.000397837	0.000638525	0.000522092	0.000282465	0.000425991	0.000549641
K00737	beta-1,4-mannosyl-glycoprotein beta-1,4-N-acetylglucosaminyltransferase [EC:2.4.1.144]	7.45207e-05	1.24539e-06	6.49304e-05	1.16399e-05	0	2.3763e-05	2.03477e-05	8.88395e-06	1.124e-05	1.90318e-05	9.97166e-06	0	4.42026e-06	2.63449e-05	2.17643e-05	6.30317e-06	1.93019e-05	0	7.98967e-06	8.16367e-06	2.57104e-05	0	2.44783e-05	1.60973e-05	2.01626e-06	3.247e-05	2.50811e-05	1.1532e-05	1.64706e-06	1.79322e-05	0	1.56812e-06	1.95102e-06	9.70059e-06	0	1.64258e-06	0	2.09295e-05	1.05997e-05	1.40883e-05	6.44514e-07	4.89674e-06	2.53725e-06	0	6.83963e-06	3.81068e-05	9.1004e-06	7.58298e-06
K00748	lipid-A-disaccharide synthase [EC:2.4.1.182]	0.000261685	0.000146745	0.000317751	0.00030425	0.00032568	0.00027713	0.00022579	0.000190934	0.00018849	0.00025274	0.000496928	0.000211802	0.00029065	0.000105636	0.000253191	0.000119902	3.47169e-05	3.5153e-05	4.02739e-05	9.46244e-05	0.000338176	0.000338581	0.000232116	0.000283688	0.000160458	0.000184265	0.000123843	0.000199873	0.000318857	0.000249699	0.000225865	0.000196778	0.000155841	6.39039e-05	0.000135505	0.000113999	0.00012144	0.000187725	9.92138e-05	0.000108748	0.000264671	0.000276106	0.00031726	0.000347342	0.00025596	0.000143498	0.000218336	0.00015904
K00752	hyaluronan synthase [EC:2.4.1.212]	0	1.10306e-06	0	0	0	0	0	0	0	0	2.60977e-06	1.36815e-06	0	0	0	0	0	0	0	0	0	0	0	0	0	0	3.9754e-07	0	0	0	3.36402e-07	0	0	1.02805e-06	0	0	0	1.26442e-06	0	0	0	0	0	0	0	0	0	0
K00754	L-malate glycosyltransferase [EC:2.4.1.-]	0.00024359	9.17793e-05	0.000219065	0.000309899	0.000510422	0.000347433	0.00023866	0.000188906	0.000236002	0.000298299	0.000490559	0.000511644	0.000305558	0.000364544	0.00041357	0.000328699	0.000149016	0.00196947	0.000150079	0.000181913	0.000333567	0.000409506	0.00023304	0.000306065	0.000500854	0.000325734	0.000241487	0.0002216	0.000471506	0.000277847	0.000211316	0.000268911	0.000582214	0.000204793	0.00118794	0.000472849	0.000165314	0.00023302	0.000101716	0.000271911	0.000204778	0.000590465	0.00053926	0.000215516	0.000143076	0.000327832	0.000365492	0.000159815
K00756	pyrimidine-nucleoside phosphorylase [EC:2.4.2.2]	0.00014924	0.00023016	0.000128135	0.000197386	0.000147034	0.000194475	0.000329443	0.000129155	0.000341555	0.000169022	0.000135888	0.000260839	0.000280999	0.000284399	0.000236614	0.000373123	0.000544581	0.000656763	0.000429049	0.000371663	0.000166717	0.000203858	0.0002342	0.000183085	0.000258705	0.000223734	0.000257028	0.000309128	0.000256221	0.000337442	0.000180532	0.000310904	0.000299406	0.0003023	0.000386884	0.000352023	0.000353035	0.000264195	0.00046421	0.000417395	0.00010898	0.000244714	0.000240584	0.000166507	0.000386846	0.000305355	0.000222233	0.000178158
K00757	uridine phosphorylase [EC:2.4.2.3]	0.000580292	0.000521608	0.000643674	0.000429172	0.000407682	0.000423855	0.000354099	0.000571199	0.000354457	0.000425589	0.00054417	0.000360414	0.000451693	0.000380307	0.00043387	0.00034975	0.000271384	0.000208658	0.000180164	0.000366718	0.000549181	0.000418559	0.000473691	0.000509138	0.000325786	0.000462874	0.000390285	0.000418155	0.000389028	0.000384677	0.000527015	0.000285866	0.000278343	0.000476298	0.000304902	0.000371723	0.000390073	0.000530356	0.000416025	0.00028666	0.000421547	0.000336703	0.000301166	0.000569169	0.000395548	0.000298646	0.000386453	0.000537826
K00758	thymidine phosphorylase [EC:2.4.2.4]	8.32855e-07	0	0	0	2.4146e-06	1.7486e-06	3.75259e-06	8.88395e-07	4.77515e-07	3.14204e-07	6.23229e-07	4.92535e-06	4.59851e-06	4.05826e-07	0	5.78552e-07	0	0	0	0	3.29655e-07	0	3.16778e-06	1.67897e-07	9.92128e-07	0	2.5298e-06	2.63087e-07	7.20589e-07	6.91273e-08	1.05125e-06	0	1.38823e-06	0	4.70358e-07	5.71333e-07	0	3.32743e-07	0	1.33412e-07	0	3.1131e-06	1.13608e-07	4.5264e-08	1.22136e-07	6.18849e-07	3.40988e-06	2.97454e-06
K00759	adenine phosphoribosyltransferase [EC:2.4.2.7]	0.000738554	0.000700589	0.000730631	0.000857366	0.000793235	0.00072875	0.000843051	0.000727847	0.000755836	0.000743611	0.000673803	0.000502513	0.000783116	0.000857389	0.000784998	0.000829913	0.000851344	0.000832512	0.000942957	0.000770049	0.000795395	0.000833237	0.000810688	0.000739206	0.000873049	0.000774383	0.000803554	0.000846933	0.000731411	0.000817224	0.000707295	0.000704515	0.000757258	0.000768772	0.000833356	0.00082348	0.00085685	0.000771237	0.000764774	0.000833944	0.000806332	0.000846637	0.000836999	0.000719025	0.000772888	0.000877719	0.00077653	0.000719765
K00760	hypoxanthine phosphoribosyltransferase [EC:2.4.2.8]	0.000884115	0.000802375	0.000810663	0.00118109	0.00115447	0.00104167	0.00117494	0.000837126	0.00103288	0.00105825	0.00084968	0.00094291	0.000983838	0.00117075	0.00102076	0.00113353	0.00119576	0.000980776	0.00142573	0.00101681	0.000930843	0.00115844	0.00101169	0.000923698	0.00122475	0.000989902	0.00116713	0.00109307	0.00106966	0.001054	0.000902958	0.00111175	0.00119015	0.00093384	0.0010759	0.001089	0.00111397	0.000890359	0.000911343	0.00119	0.00113784	0.00120839	0.00124309	0.000892247	0.000835354	0.00131453	0.00110797	0.000913337
K00761	uracil phosphoribosyltransferase [EC:2.4.2.9]	0.000781922	0.000758179	0.000760253	0.000866995	0.000821388	0.000758409	0.000856832	0.000767651	0.000787333	0.000755124	0.000694019	0.00066432	0.00082297	0.000856138	0.000795147	0.000846432	0.000872999	0.000847027	0.000918795	0.000813365	0.000799541	0.000834101	0.000828542	0.000750197	0.000869609	0.000805091	0.000829394	0.000857566	0.000752746	0.000832741	0.000762696	0.000723914	0.000779395	0.000802618	0.000849202	0.000852439	0.000864196	0.000800036	0.000793377	0.000844653	0.00082053	0.000858716	0.000835635	0.000776494	0.000785957	0.000873292	0.000775157	0.000768217
K00762	orotate phosphoribosyltransferase [EC:2.4.2.10]	0.00102607	0.00114649	0.00106736	0.000977724	0.000965742	0.00100579	0.000962252	0.00114903	0.000947668	0.000997069	0.000838842	0.000933914	0.000963514	0.00110817	0.00100423	0.00104657	0.000951206	0.00100746	0.00105714	0.00105588	0.000953425	0.00088088	0.000987355	0.00103811	0.00103293	0.00110663	0.00108919	0.00100283	0.000935449	0.000970209	0.000982632	0.000971163	0.000996702	0.00113406	0.00104139	0.00107528	0.00103444	0.00103334	0.00107817	0.00104681	0.00100922	0.00094906	0.000894409	0.000967337	0.00101351	0.00102551	0.00101932	0.00116009
K00763	nicotinate phosphoribosyltransferase [EC:6.3.4.21]	0.000675564	0.000665798	0.000638471	0.000693744	0.000664002	0.000657663	0.00074015	0.000670178	0.000688286	0.000661289	0.000603515	0.000641232	0.000667084	0.000798248	0.000751698	0.000789095	0.000857885	0.000837909	0.000898706	0.000783522	0.000694659	0.000723806	0.000710003	0.000650433	0.000824579	0.000727125	0.000753762	0.000767919	0.000668655	0.000716107	0.000678617	0.000676403	0.000747513	0.000773167	0.000817959	0.000797966	0.000795405	0.000707941	0.000742912	0.000803936	0.000726819	0.000751232	0.000733795	0.00061121	0.000637592	0.000786522	0.000681518	0.000662139
K00764	amidophosphoribosyltransferase [EC:2.4.2.14]	0.00120546	0.00131154	0.00133393	0.00101848	0.00102133	0.00101453	0.00100521	0.00125646	0.0010264	0.000994409	0.00120758	0.00104772	0.00110239	0.000915633	0.000999845	0.000946421	0.000775884	0.000938172	0.000575969	0.000980799	0.00118468	0.000932569	0.00109116	0.0011829	0.000834425	0.00109362	0.000885872	0.00101688	0.001004	0.00110602	0.00110931	0.000847854	0.000750505	0.00106781	0.000943366	0.00094162	0.000915417	0.00114196	0.00102608	0.000856274	0.000983545	0.000892013	0.000931852	0.00128143	0.00140973	0.000730508	0.000934122	0.00114597
K00765	ATP phosphoribosyltransferase [EC:2.4.2.17]	0.000674811	0.000584076	0.000620376	0.000542732	0.000534941	0.000630772	0.000533939	0.000586251	0.000619974	0.000649164	0.000708733	0.000672357	0.000631947	0.000408574	0.000515465	0.000442582	0.000402763	0.000224358	0.000282745	0.00054315	0.000570612	0.000531517	0.000595198	0.000489286	0.000409106	0.000555934	0.000344893	0.000520741	0.000487577	0.00055205	0.000688733	0.000557381	0.000400637	0.000586306	0.000362695	0.000479928	0.000502876	0.000658188	0.000690979	0.000472354	0.00059228	0.00045652	0.000489074	0.000714404	0.000774062	0.000414197	0.000427142	0.000582347
K00766	anthranilate phosphoribosyltransferase [EC:2.4.2.18]	0.00062476	0.000695011	0.000618935	0.000467686	0.000464721	0.000475259	0.000447697	0.000610578	0.000520449	0.000508609	0.000584594	0.000429236	0.000472583	0.000390283	0.000463953	0.000361674	0.000284359	0.000189334	0.000166542	0.000432684	0.000550172	0.000484558	0.000541738	0.000520253	0.000381033	0.000510284	0.000404686	0.000479509	0.000420477	0.000502068	0.000613786	0.000351359	0.000308833	0.000522	0.000311259	0.000406505	0.000392011	0.000604915	0.000519289	0.000351777	0.000486852	0.000363756	0.00041769	0.000596221	0.000608249	0.00031284	0.000416544	0.000543964
K00767	nicotinate-nucleotide pyrophosphorylase (carboxylating) [EC:2.4.2.19]	0.000553035	0.000562786	0.000453891	0.00050287	0.000524011	0.000588302	0.000474161	0.000537486	0.00058145	0.0006088	0.000700714	0.000658949	0.000611719	0.000288331	0.000475185	0.000409552	0.000430165	0.000273293	0.000301813	0.000530867	0.000528194	0.000520701	0.000548294	0.000397776	0.000381191	0.000467137	0.000297649	0.000463289	0.000486728	0.000516743	0.000615925	0.000537797	0.000355883	0.000563207	0.000354596	0.000466466	0.000536299	0.000614152	0.000614549	0.000450777	0.000573864	0.000436872	0.000468795	0.000676395	0.000712648	0.000380037	0.00039686	0.000532314
K00768	nicotinate-nucleotide--dimethylbenzimidazole phosphoribosyltransferase [EC:2.4.2.21]	0.000467103	0.000598567	0.000367714	0.00022685	0.000252497	0.0004685	0.00024623	0.000482907	0.000477212	0.000488101	0.000328308	0.000635276	0.000376519	0.000345899	0.000298821	0.000388054	0.000404185	0.000282831	0.000303845	0.000456533	0.000289356	0.000206314	0.00039906	0.000371916	0.000246837	0.00039032	0.000348615	0.000285464	0.000287961	0.000304125	0.000469662	0.000494813	0.000332993	0.000563412	0.000244687	0.000381463	0.000443895	0.000481052	0.000585371	0.000411154	0.000314608	0.000200208	0.000173347	0.000376051	0.000503886	0.000273956	0.000378917	0.000478353
K00769	xanthine phosphoribosyltransferase [EC:2.4.2.22]	8.32855e-07	0	5.26018e-07	0	2.4146e-06	3.99039e-06	9.21568e-08	8.88395e-07	9.18297e-07	3.14204e-07	2.64872e-06	4.92535e-06	5.07897e-06	7.10195e-07	0	5.78552e-07	0	0	0	0	3.29655e-07	5.04288e-07	3.02379e-06	1.67897e-07	9.92128e-07	0	3.9754e-07	6.57718e-07	1.64706e-06	6.91273e-08	1.05125e-06	0	0	0	4.70358e-07	5.71333e-07	0	3.32743e-07	0	1.33412e-07	6.44514e-07	3.1131e-06	0	4.5264e-08	0	0	5.93408e-06	1.04737e-06
K00772	5'-methylthioadenosine phosphorylase [EC:2.4.2.28]	4.44189e-06	6.04904e-06	1.32655e-05	3.65887e-06	1.79811e-05	1.09175e-05	4.80163e-06	1.4562e-05	5.85874e-06	2.82784e-06	1.7353e-05	5.72344e-05	0.000122734	3.11133e-05	2.8607e-05	1.02617e-05	4.33415e-05	6.7664e-07	8.1023e-05	8.10087e-05	4.98161e-06	2.46381e-05	6.09558e-06	9.36847e-06	2.40031e-06	1.83901e-06	1.37513e-05	6.2264e-06	6.43383e-06	7.22864e-06	1.38345e-05	6.6721e-05	3.51559e-05	1.98361e-05	6.02646e-06	2.70312e-05	6.23758e-05	1.81345e-05	1.18155e-05	2.03497e-05	8.34077e-06	1.99338e-05	9.84604e-07	5.2094e-05	0.000103429	2.92763e-06	2.59727e-05	1.6758e-05
K00773	queuine tRNA-ribosyltransferase [EC:2.4.2.29]	0.000741905	0.000778544	0.000728439	0.000616338	0.000609074	0.000715994	0.000681389	0.000723913	0.000671738	0.000696847	0.000764327	0.000770032	0.000719367	0.000633452	0.000665012	0.00068461	0.000728986	0.000813614	0.000548454	0.000671985	0.000714987	0.000635796	0.00071351	0.000701559	0.000601051	0.000697356	0.000605652	0.000732329	0.000667699	0.000715856	0.000752029	0.000680491	0.000585534	0.000732974	0.000708518	0.000708392	0.00070774	0.000745998	0.000777717	0.000682495	0.000620478	0.000587314	0.000595922	0.000747463	0.000824728	0.000592318	0.000659812	0.000692164
K00782	L-lactate dehydrogenase complex protein LldG	0.000134724	2.63845e-05	0.000208155	0.000165291	0.000160776	0.000123904	0.000209334	9.41312e-05	4.95513e-05	7.43092e-05	0.000337186	6.67203e-05	0.000170036	0.000168502	0.000290569	0.000171282	0.000145552	0.000423641	0.000126093	9.2612e-05	0.000253694	0.000299079	0.000106889	0.000174193	0.000230238	0.000154266	9.5012e-05	0.000188655	0.000237306	0.000179508	0.000116458	4.90417e-05	0.000157038	9.11275e-05	0.000348476	0.000202787	9.46605e-05	0.000139453	7.36367e-05	0.000137201	0.000129054	0.000222577	0.000261924	0.000156282	7.47677e-05	0.000120985	0.000160021	4.63986e-05
K00783	23S rRNA (pseudouridine1915-N3)-methyltransferase [EC:2.1.1.177]	0.000809247	0.000786159	0.000762828	0.000876438	0.000865125	0.00085503	0.000862602	0.000776676	0.000842027	0.000860502	0.000791983	0.000826947	0.000835831	0.000858347	0.000806523	0.000863931	0.000873162	0.000853826	0.000918795	0.000813365	0.000806461	0.000847705	0.000843869	0.000796801	0.000876031	0.00081873	0.000846055	0.000861833	0.000821082	0.000841214	0.000807746	0.000849886	0.00085107	0.000802618	0.000863156	0.000852439	0.000864196	0.000800036	0.000816219	0.000877668	0.000873051	0.00087667	0.000873618	0.000803316	0.000825542	0.000900315	0.000840624	0.000790114
K00784	ribonuclease Z [EC:3.1.26.11]	0.000759445	0.00094314	0.000887746	0.000837639	0.000817317	0.000694831	0.000726004	0.000943089	0.000666458	0.000708701	0.000585999	0.000730911	0.000733292	0.000944455	0.000862812	0.000732123	0.000607051	0.00078168	0.000761254	0.000779464	0.000706194	0.000756738	0.000681589	0.000869986	0.000873505	0.000908621	0.000930966	0.000712988	0.00079979	0.000780784	0.000765776	0.000613488	0.000781627	0.000840505	0.000866744	0.000856983	0.000585803	0.000809167	0.000707047	0.000727918	0.000667363	0.000786234	0.000747229	0.000792458	0.000569552	0.000837248	0.000831103	0.000918703
K00786	beta-1,6-galactosyltransferase [EC:2.4.1.-]	0	9.99871e-06	5.32594e-06	4.72144e-06	2.38891e-05	9.55002e-06	2.36852e-05	4.67373e-06	2.6447e-06	8.52839e-06	1.08286e-05	0.00015337	2.23415e-05	1.79804e-05	6.38267e-06	1.10838e-05	4.85498e-06	1.29e-05	5.10354e-06	3.62227e-05	7.74556e-06	0	6.19157e-06	6.40431e-06	2.97639e-06	4.06114e-06	1.807e-06	5.70022e-06	2.38824e-05	8.33765e-06	3.88544e-05	4.85611e-06	7.46641e-06	1.97175e-05	1.91083e-06	2.37103e-05	3.2976e-06	2.90817e-05	4.73869e-06	6.20204e-06	1.92103e-06	1.14257e-06	2.04116e-05	1.69336e-05	5.98468e-06	3.23706e-06	1.4407e-05	2.5979e-06
K00788	thiamine-phosphate pyrophosphorylase [EC:2.5.1.3]	0.000948423	0.000948418	0.000994706	0.0009408	0.00097227	0.00101006	0.000920739	0.00103637	0.000871682	0.000951876	0.00126206	0.00102842	0.00101693	0.000691493	0.00095359	0.000800395	0.000690571	0.000531209	0.000611087	0.000833881	0.000994456	0.00097381	0.00090976	0.000940801	0.000756413	0.000898957	0.000702417	0.000830091	0.000967357	0.00093506	0.00100378	0.000942704	0.000710221	0.000912369	0.00065979	0.000841976	0.000853663	0.00102338	0.000986375	0.000793553	0.000907836	0.000815318	0.000902674	0.00111458	0.00123936	0.000712153	0.000866449	0.00101423
K00789	S-adenosylmethionine synthetase [EC:2.5.1.6]	0.000828472	0.000800964	0.00078474	0.000901323	0.000872317	0.00088062	0.000890745	0.000832645	0.000871863	0.000880589	0.000819252	0.000885524	0.000849356	0.000868171	0.000826605	0.000880412	0.000933544	0.000914606	0.000966161	0.000864155	0.000831227	0.000850298	0.000880275	0.000819628	0.000888576	0.000843317	0.000880198	0.000892571	0.000878703	0.000862361	0.000837275	0.00091361	0.000882999	0.00083947	0.000874055	0.000871088	0.000918046	0.000829889	0.000840663	0.000914267	0.000879051	0.000887208	0.000875019	0.000818815	0.000833237	0.000921503	0.000845377	0.000827243
K00790	UDP-N-acetylglucosamine 1-carboxyvinyltransferase [EC:2.5.1.7]	0.00120998	0.0012141	0.00102898	0.00112043	0.00109146	0.00119194	0.0011956	0.0012127	0.00111156	0.00121328	0.0010268	0.00118447	0.00118482	0.00128049	0.00112643	0.0012916	0.00138078	0.00147838	0.00133875	0.00125249	0.00107253	0.00113621	0.0011827	0.00117792	0.00120225	0.00116917	0.00124456	0.00121251	0.00112921	0.00112274	0.00124074	0.00127267	0.00118173	0.00127913	0.00132517	0.00129185	0.00131661	0.00120446	0.00125849	0.00132565	0.00119827	0.0011206	0.00111719	0.00111992	0.00131771	0.0012668	0.00125516	0.00120315
K00791	tRNA dimethylallyltransferase [EC:2.5.1.75]	0.00102959	0.000901046	0.00107671	0.00117311	0.00114152	0.00102715	0.00108111	0.000956963	0.000973748	0.0010062	0.00118545	0.000867183	0.00110763	0.000959372	0.00104598	0.000964051	0.000906035	0.000881858	0.000956359	0.000904593	0.00113852	0.00116642	0.00105557	0.00102954	0.00102866	0.000988972	0.000951882	0.00105678	0.00107351	0.0010704	0.000982801	0.000912548	0.000925293	0.000866759	0.000983413	0.000964045	0.000985471	0.000987029	0.000892498	0.000941456	0.0010802	0.00113138	0.00114956	0.00112763	0.00104096	0.00100813	0.000985854	0.000924701
K00793	riboflavin synthase [EC:2.5.1.9]	0.000460073	0.000606298	0.000574217	0.000453379	0.000476464	0.000459466	0.000414651	0.000583161	0.000504764	0.000464917	0.000604294	0.000475172	0.00056437	0.000407728	0.000463972	0.000429451	0.000263493	0.000265593	0.000296903	0.000421295	0.000513917	0.000449164	0.00045098	0.000548342	0.000351091	0.000457356	0.000394558	0.000365245	0.000490897	0.000507917	0.000518577	0.000501624	0.000336085	0.000495	0.000332739	0.000418831	0.000414818	0.000528659	0.000532162	0.000417478	0.000385268	0.000365992	0.000419337	0.000554243	0.000688933	0.000308838	0.000434339	0.000549868
K00794	6,7-dimethyl-8-ribityllumazine synthase [EC:2.5.1.78]	0.000463285	0.000606298	0.000579445	0.000480574	0.000483554	0.000462694	0.000428863	0.00058429	0.000514167	0.000471976	0.000604294	0.000477487	0.000569318	0.000418888	0.00046932	0.000436332	0.000271318	0.000271513	0.000321012	0.000432249	0.00051823	0.000461123	0.0004625	0.000551047	0.000366293	0.000461455	0.000408219	0.000370989	0.000494655	0.000518918	0.000519124	0.000510629	0.000354244	0.000497689	0.000346673	0.000427651	0.000423758	0.000530414	0.000533596	0.000429111	0.000393457	0.000375132	0.000433728	0.000556021	0.000688933	0.000328593	0.000440406	0.000552549
K00795	farnesyl diphosphate synthase [EC:2.5.1.1 2.5.1.10]	2.37959e-06	0	7.26563e-06	5.13526e-07	2.67147e-06	3.99039e-06	5.22796e-07	8.88395e-07	6.39135e-06	1.66079e-06	2.64872e-06	5.01657e-06	5.75162e-06	5.78302e-06	5.17513e-07	5.78552e-07	0	0	0	0	3.29655e-07	5.04288e-07	3.02379e-06	5.27404e-06	9.92128e-07	0	4.01154e-06	6.57718e-07	5.66177e-06	6.91273e-08	1.51381e-06	8.59937e-07	0	0	4.70358e-07	9.28415e-07	0	3.32743e-07	8.10565e-07	1.33412e-07	6.44514e-07	4.58212e-06	0	3.11675e-06	4.47833e-07	0	5.93408e-06	2.51369e-06
K00796	dihydropteroate synthase [EC:2.5.1.15]	0.000467886	0.000349486	0.000503895	0.000501008	0.000496808	0.000485336	0.000493092	0.000463285	0.000495759	0.000481965	0.000617193	0.000618729	0.000604344	0.000374856	0.000515681	0.000472023	0.000402045	0.000246308	0.000401631	0.000467855	0.000455241	0.000535614	0.000406991	0.000381614	0.000380647	0.000452815	0.00035269	0.000445882	0.000496714	0.000501747	0.000569836	0.000496768	0.000355626	0.00045484	0.000369133	0.000460764	0.000404284	0.000481587	0.000396523	0.000458942	0.000400622	0.000419774	0.000470593	0.000600376	0.000666256	0.000428236	0.000410499	0.000498651
K00797	spermidine synthase [EC:2.5.1.16]	0.000286254	0.000380772	0.000207021	0.000146205	0.000185	0.000271806	0.000203332	0.000360283	0.000198251	0.00022019	0.000194158	0.000266285	0.000272528	0.00022613	0.000184359	0.000320556	0.000318031	0.00026136	0.000258248	0.000346666	0.000224527	0.000148369	0.000289252	0.000287778	0.000179687	0.000273754	0.000281395	0.00020933	0.00016221	0.000177514	0.00025555	0.000304523	0.000175999	0.000398554	0.000173702	0.000258537	0.000378946	0.000332832	0.000332672	0.000234549	0.000231523	0.000173754	0.00012353	0.000279914	0.000389492	0.000159366	0.000282016	0.000370089
K00798	cob(I)alamin adenosyltransferase [EC:2.5.1.17]	0.000262488	0.000152394	0.000333202	0.000316318	0.000323702	0.000280706	0.000240275	0.000193329	0.0002034	0.000261731	0.000513005	0.00023888	0.000291649	0.000109677	0.000258294	0.000130662	9.5878e-05	9.34085e-05	8.27829e-05	0.000128935	0.000349975	0.000335772	0.00025225	0.000286333	0.000159658	0.000187052	0.00014512	0.000210068	0.000344566	0.000265908	0.000241657	0.000251548	0.000179334	7.69786e-05	0.00013682	0.000119089	0.000169578	0.000192051	0.000118067	0.00013383	0.000265401	0.000279002	0.000317639	0.000348651	0.000255533	0.000163265	0.000215701	0.000163512
K00799	glutathione S-transferase [EC:2.5.1.18]	4.99713e-06	0	1.57806e-06	0	1.44876e-05	1.72169e-05	5.52941e-07	5.33037e-06	4.18744e-06	1.57102e-06	7.94617e-06	1.52321e-05	2.77352e-05	3.34806e-06	0	3.47131e-06	0	0	0	0	1.97793e-06	1.51286e-06	1.55509e-05	8.39484e-07	5.95277e-06	0	1.19262e-06	1.97315e-06	7.10295e-06	4.14764e-07	6.30753e-06	0	0	0	2.82215e-06	3.428e-06	0	1.99646e-06	0	6.67058e-07	1.93354e-06	1.86786e-05	0	2.2632e-07	0	0	2.80319e-05	6.28424e-06
K00800	3-phosphoshikimate 1-carboxyvinyltransferase [EC:2.5.1.19]	0.000734528	0.000778544	0.000713678	0.000569222	0.000569413	0.000667616	0.000579156	0.00071333	0.00065429	0.000674	0.000738424	0.000725567	0.000668198	0.000500104	0.000572205	0.000553949	0.00060078	0.000409354	0.000429137	0.000637703	0.0006859	0.00055122	0.000705591	0.000662657	0.000476011	0.000635442	0.000539263	0.000644151	0.000587817	0.000651895	0.00073235	0.000653479	0.000476052	0.000667851	0.000446558	0.000555989	0.00066312	0.000698117	0.000724313	0.000573027	0.000609255	0.000509089	0.000510072	0.000737319	0.000817563	0.000496159	0.000554814	0.00067771
K00801	farnesyl-diphosphate farnesyltransferase [EC:2.5.1.21]	2.73256e-05	2.79797e-05	2.57519e-06	9.44331e-06	4.39935e-05	9.68901e-05	1.05334e-05	9.64372e-06	5.58178e-05	0.000110854	9.90467e-05	0.000164297	1.31008e-05	2.20938e-06	1.13758e-05	1.74988e-05	1.62913e-07	6.79862e-06	0	2.56899e-07	6.92076e-06	1.36039e-05	1.63347e-05	4.66043e-05	6.42227e-06	1.37236e-05	1.91903e-05	4.5308e-06	6.37037e-05	8.47367e-06	6.6409e-05	0.000141168	7.53574e-05	0	1.3954e-05	0	0	0	2.28414e-05	3.30149e-05	5.25215e-05	1.79547e-05	3.80966e-05	2.22953e-05	3.97077e-05	2.76421e-05	6.54666e-05	2.38244e-05
K00803	alkyldihydroxyacetonephosphate synthase [EC:2.5.1.26]	0	1.10306e-06	0	0	0	0	0	0	0	0	2.60977e-06	1.36815e-06	0	0	0	0	0	0	0	0	0	0	0	0	0	0	3.9754e-07	0	0	0	3.36402e-07	0	0	1.02805e-06	0	0	0	1.26442e-06	0	0	0	0	0	0	0	0	0	0
K00805	heptaprenyl diphosphate synthase component 1 [EC:2.5.1.30]	0.000550111	0.000638657	0.000449203	0.000577046	0.00054778	0.000580321	0.000645468	0.000592028	0.00066516	0.000605433	0.000294218	0.000594817	0.000545109	0.000755992	0.000551161	0.000751693	0.000823728	0.000826042	0.00088153	0.000722359	0.000474838	0.000486368	0.000609006	0.000521021	0.000715357	0.000638172	0.000731392	0.000658727	0.000499857	0.000599543	0.000531464	0.000609378	0.000687187	0.000749252	0.000729701	0.00074388	0.000735513	0.000623607	0.000713841	0.000773358	0.000615565	0.00060694	0.000548387	0.000445001	0.00058031	0.000737157	0.00062789	0.000636918
K00806	undecaprenyl diphosphate synthase [EC:2.5.1.31]	0.000814611	0.00079125	0.000774137	0.000884312	0.000872882	0.000863739	0.000888699	0.000781466	0.000862759	0.000873183	0.000814637	0.000861444	0.000846257	0.000864654	0.000823702	0.000868369	0.000943279	0.000914643	0.000962923	0.000869321	0.000823354	0.000881816	0.000877155	0.00080617	0.000879743	0.000825425	0.000880614	0.000878825	0.000865372	0.000870055	0.000825039	0.000922159	0.000912139	0.000819014	0.000866882	0.000861321	0.000920219	0.000806547	0.000828458	0.000904679	0.000879809	0.000888249	0.000905088	0.000825241	0.000845817	0.000938902	0.000848211	0.000815513
K00812	aspartate aminotransferase [EC:2.6.1.1]	0.000645453	0.000345812	0.000672065	0.000674609	0.000673434	0.000629663	0.000565429	0.000465217	0.000458607	0.000584203	0.0010685	0.000508965	0.000759211	0.000301066	0.000577262	0.000444813	0.0004591	0.000340591	0.000382457	0.00045207	0.000841114	0.00078819	0.000677345	0.000603217	0.000381319	0.000463363	0.000378774	0.00057247	0.000710638	0.000591131	0.000624966	0.000622598	0.000370988	0.000358395	0.000328983	0.00037691	0.000678663	0.000536947	0.000324816	0.000415239	0.000623646	0.00063834	0.000685303	0.00084521	0.0005984	0.000372615	0.000474697	0.000398983
K00813	aspartate aminotransferase [EC:2.6.1.1]	3.92632e-06	4.12758e-06	4.99717e-06	5.94834e-06	8.06579e-06	4.75259e-06	2.84825e-06	1.22444e-05	2.24065e-06	5.52101e-06	2.06445e-06	8.66498e-06	4.98288e-06	1.75858e-06	1.9263e-06	3.50176e-06	2.17013e-06	1.28884e-07	1.02071e-06	4.90962e-06	4.20795e-06	0	9.79132e-06	1.10293e-05	4.6086e-06	7.66253e-06	2.31296e-06	9.64653e-06	4.88971e-06	5.52275e-07	2.60711e-06	2.98449e-06	1.31319e-06	4.9821e-06	1.94023e-06	5.10629e-06	7.28476e-06	4.12601e-06	0	4.15355e-06	2.16102e-06	5.64308e-06	0	1.21728e-06	8.26455e-06	1.95176e-06	8.19257e-06	4.31518e-06
K00817	histidinol-phosphate aminotransferase [EC:2.6.1.9]	0.00084161	0.000801459	0.000896963	0.00066662	0.000681461	0.000724109	0.000658634	0.000783783	0.000668638	0.000717504	0.00102323	0.000741465	0.000763954	0.000514071	0.000752443	0.000563035	0.000490501	0.000356475	0.000389857	0.000669402	0.000877073	0.000738941	0.000739092	0.000774949	0.00054738	0.000707171	0.000527228	0.000651429	0.000706971	0.0006985	0.000833184	0.00067692	0.000505435	0.000697915	0.000483658	0.000578385	0.000657409	0.000798538	0.000737968	0.00056271	0.000719847	0.000623142	0.000659978	0.000874283	0.000846957	0.000473499	0.000591481	0.000673856
K00818	acetylornithine aminotransferase [EC:2.6.1.11]	0.000261576	0.000156451	0.000325887	0.000307138	0.000342415	0.000285447	0.00025412	0.000204463	0.000190262	0.000263122	0.000514651	0.000287905	0.000407176	0.000138068	0.000274107	0.000136562	8.4309e-05	4.02439e-05	0.000122934	0.000159541	0.000345169	0.000355142	0.000245423	0.000294479	0.000163235	0.00019186	0.000144117	0.00021192	0.000334246	0.000255483	0.000290562	0.000290536	0.000173381	8.18223e-05	0.000142288	0.000141174	0.000188369	0.000206808	0.000107522	0.000130574	0.000273523	0.000290468	0.000321407	0.000403169	0.000340947	0.000154899	0.000236558	0.000171462
K00819	ornithine--oxo-acid transaminase [EC:2.6.1.13]	5.11611e-06	3.61163e-06	1.77531e-06	3.72306e-06	1.87517e-06	9.16892e-06	7.24335e-06	8.55563e-06	1.14493e-05	1.37576e-05	1.36565e-05	1.06351e-05	8.28798e-06	3.68625e-06	2.30006e-06	1.2789e-06	4.58479e-07	1.35328e-06	1.93582e-07	2.21218e-06	2.52424e-06	6.6638e-06	8.44741e-06	9.6281e-06	1.42418e-06	3.32937e-06	2.04191e-06	5.15213e-06	1.16066e-05	5.9836e-06	5.26973e-05	3.25916e-05	7.87162e-06	1.21257e-06	3.02793e-06	5.32053e-06	4.42881e-06	4.12601e-06	8.10565e-07	2.57929e-06	3.1657e-06	1.75466e-06	5.83188e-06	9.67921e-06	2.01525e-06	2.38019e-06	4.8934e-06	9.59393e-06
K00820	glutamine---fructose-6-phosphate transaminase (isomerizing) [EC:2.6.1.16]	0.000898958	0.000786521	0.000975312	0.00101765	0.000957094	0.000820349	0.0009885	0.000855582	0.000816915	0.000804836	0.000986742	0.000673213	0.000930858	0.000889618	0.00101056	0.000910149	0.000936881	0.000873561	0.000934088	0.000909288	0.00102595	0.00109752	0.00094479	0.000882113	0.000980711	0.000894302	0.000871913	0.000964796	0.000933382	0.000960756	0.000843075	0.000780965	0.000899258	0.000838231	0.000935983	0.000901002	0.00092433	0.000888362	0.000856783	0.000879174	0.000938495	0.00101149	0.00109989	0.00095951	0.00105028	0.000938779	0.000828807	0.000812646
K00821	acetylornithine/N-succinyldiaminopimelate aminotransferase [EC:2.6.1.11 2.6.1.17]	0.0004593	0.000625145	0.000389073	0.000244067	0.000241409	0.000379244	0.000324622	0.000513579	0.00045037	0.000394786	0.000216449	0.000475772	0.00035942	0.00037044	0.000293138	0.000390858	0.000375428	0.000239324	0.00028886	0.000470755	0.000312003	0.000199842	0.000395492	0.000362704	0.000281636	0.000431822	0.000343203	0.000342057	0.000217772	0.00032052	0.000456896	0.000366982	0.000259311	0.000592672	0.000257932	0.000408539	0.000436279	0.000516481	0.000611889	0.000398471	0.000337239	0.000197452	0.000191297	0.000390265	0.000527832	0.000276578	0.000334862	0.000482651
K00822	beta-alanine--pyruvate transaminase [EC:2.6.1.18]	0	0	5.26018e-07	0	0	2.24179e-06	0	0	4.40783e-07	0	2.02549e-06	0	4.80463e-07	3.04369e-07	0	0	0	0	0	0	0	5.04288e-07	8.6394e-07	0	0	0	3.9754e-07	6.57718e-07	9.26472e-07	0	0	0	0	0	0	0	0	0	0	0	6.44514e-07	0	0	0	0	0	2.5242e-06	0
K00823	4-aminobutyrate aminotransferase [EC:2.6.1.19]	1.56953e-05	2.41072e-06	3.12981e-05	0.000102363	6.65813e-05	9.36508e-05	0.000219615	1.88881e-05	3.9867e-05	6.19655e-05	5.5703e-05	9.73373e-05	9.5478e-05	0.000242904	0.000175653	0.000237777	0.000305255	0.000484007	0.000297017	0.000111308	5.28288e-05	0.000171872	4.00052e-05	8.11089e-05	0.000220829	0.000121564	0.0001733	0.000188042	0.000172813	0.000139123	7.78433e-05	0.000122169	0.000195802	0.000120282	0.00032989	0.000260876	0.000132761	8.38346e-05	0.000103168	0.000237402	2.5373e-05	0.00013358	0.000144642	1.40892e-05	7.85743e-06	0.000215752	0.00020415	4.21986e-05
K00824	D-alanine transaminase [EC:2.6.1.21]	3.613e-05	0.000199915	9.41244e-05	5.04967e-06	2.34781e-05	1.40784e-05	1.61102e-05	0.000108075	2.44366e-05	1.11677e-05	7.89281e-06	1.12312e-05	1.57111e-05	5.90477e-05	2.87507e-05	8.4225e-06	3.12377e-05	9.60184e-06	1.90767e-05	5.68126e-05	3.65095e-05	3.8506e-05	2.9326e-05	0.000165776	1.31217e-05	2.69798e-05	0.000130863	9.55884e-06	6.24854e-05	2.29681e-05	4.70016e-05	4.70638e-05	5.13764e-05	1.43136e-05	7.52572e-06	1.07411e-05	2.35927e-05	6.0283e-06	2.70083e-05	1.12066e-05	1.17529e-05	1.68529e-05	3.11665e-05	3.5605e-05	2.91906e-05	3.01727e-05	0.000126933	5.48404e-05
K00826	branched-chain amino acid aminotransferase [EC:2.6.1.42]	0.000736868	0.000781213	0.000709404	0.000570506	0.000586983	0.000681067	0.000590094	0.000719471	0.000657486	0.000683246	0.000761289	0.000791877	0.000691164	0.000527125	0.000583619	0.000577517	0.000610255	0.000780019	0.00041446	0.00063081	0.000703753	0.000583296	0.000725749	0.000663176	0.000499406	0.000641879	0.000535125	0.000653293	0.000607478	0.000665609	0.000831546	0.000730874	0.000531656	0.000684419	0.000621855	0.000600035	0.000675827	0.00071522	0.000725778	0.00058096	0.000611265	0.000545325	0.000568713	0.000757809	0.000821838	0.000512772	0.000569029	0.000677144
K00831	phosphoserine aminotransferase [EC:2.6.1.52]	0.000689762	0.000737265	0.000704413	0.000549743	0.00051607	0.000547714	0.000552689	0.000690418	0.00058243	0.000543687	0.000618665	0.000482544	0.000535414	0.000495511	0.00054861	0.000540203	0.000402524	0.000652477	0.000277712	0.000507713	0.000653628	0.000520344	0.000613733	0.000608091	0.000495256	0.000620579	0.000465745	0.0005423	0.000486822	0.000561806	0.000620537	0.000364567	0.000408611	0.000642216	0.000585272	0.000568353	0.000499482	0.000688517	0.000687232	0.000479167	0.000543303	0.000477841	0.000497102	0.000650988	0.000662599	0.000432016	0.00048359	0.000625261
K00832	aromatic-amino-acid transaminase [EC:2.6.1.57]	6.89088e-06	6.43155e-06	5.6547e-06	9.50022e-06	1.36142e-05	1.18254e-05	1.07289e-05	1.46006e-05	5.97811e-06	1.48798e-05	1.86287e-05	4.07596e-05	1.45681e-05	5.96902e-06	7.02956e-06	7.57447e-06	5.46812e-05	5.76594e-05	4.25089e-05	3.86775e-05	1.37783e-05	0	3.35257e-05	1.48104e-05	6.08079e-06	1.04498e-05	2.35362e-05	1.93588e-05	3.36361e-05	1.68492e-05	1.87228e-05	5.77549e-05	2.29808e-05	1.71342e-05	3.63792e-06	1.12392e-05	5.44081e-05	8.43503e-06	1.19247e-06	2.80965e-05	3.00457e-06	1.49163e-05	0	2.61642e-06	8.26455e-06	1.84822e-05	1.28867e-05	9.56251e-06
K00833	adenosylmethionine---8-amino-7-oxononanoate aminotransferase [EC:2.6.1.62]	0.000389687	0.000422226	0.000521657	0.000487557	0.000505208	0.000391181	0.000361808	0.000406138	0.000302821	0.000358268	0.000601426	0.000270769	0.00046501	0.000231078	0.000325732	0.000243157	0.000107844	0.000154934	0.000149542	0.000182755	0.000522905	0.000446067	0.000405444	0.000537827	0.000235732	0.000321146	0.000352898	0.000320893	0.00047812	0.000377649	0.000337751	0.000309143	0.000223598	0.00016835	0.000196725	0.000216633	0.000296557	0.000312945	0.000178223	0.000192427	0.000359604	0.000403391	0.000414821	0.000532853	0.000408274	0.00024245	0.000418921	0.000324661
K00835	valine--pyruvate aminotransferase [EC:2.6.1.66]	2.81584e-05	2.79797e-05	2.57519e-06	9.44331e-06	4.64081e-05	9.83697e-05	9.52316e-06	9.9141e-06	5.54652e-05	0.000106096	9.8587e-05	0.000167644	1.74591e-05	2.61521e-06	1.13758e-05	1.80773e-05	1.62913e-07	6.79862e-06	0	0	7.25041e-06	1.36039e-05	1.84946e-05	4.67722e-05	7.4144e-06	1.36393e-05	1.91903e-05	4.5308e-06	6.44243e-05	8.5428e-06	4.61009e-05	0.000125972	7.30631e-05	0	1.44244e-05	5.71333e-07	0	3.32743e-07	2.28414e-05	3.31484e-05	5.25215e-05	2.10678e-05	3.80966e-05	2.23406e-05	3.97077e-05	2.76421e-05	6.88765e-05	2.48717e-05
K00836	diaminobutyrate-2-oxoglutarate transaminase [EC:2.6.1.76]	8.32855e-07	2.97115e-05	0	0	7.14105e-06	1.7486e-06	9.21568e-08	2.46047e-05	5.95057e-06	3.14204e-07	0	0	4.16609e-06	9.36781e-06	1.66754e-06	5.78552e-07	0	0	1.72112e-05	2.51475e-05	4.87663e-06	0	2.15985e-06	1.67897e-07	1.46579e-05	9.84636e-06	0	9.77808e-06	7.20589e-07	1.24823e-05	1.05125e-06	5.05845e-06	4.53988e-06	5.5093e-06	1.29642e-05	1.689e-05	2.45033e-05	5.78972e-06	1.5619e-05	1.48621e-05	4.11731e-05	3.1131e-06	1.31407e-05	4.5264e-08	2.62186e-05	0	3.40988e-06	1.04737e-06
K00839	(S)-ureidoglycine---glyoxylate transaminase [EC:2.6.1.112]	8.32855e-07	1.4233e-07	0	0	3.85309e-06	2.01761e-06	3.34779e-06	1.50641e-06	1.89537e-06	1.00545e-05	6.53611e-06	2.3286e-05	6.61645e-06	1.82622e-06	0	1.70521e-06	0	0	0	6.85063e-07	3.29655e-07	0	2.15985e-06	1.67897e-07	9.92128e-07	8.42879e-08	0	0	7.20589e-07	6.91273e-08	7.19458e-05	4.71144e-05	6.08381e-06	0	4.70358e-07	5.71333e-07	0	3.32743e-07	0	1.33412e-07	0	3.1131e-06	0	4.5264e-08	0	0	3.40988e-06	1.04737e-06
K00840	succinylornithine aminotransferase [EC:2.6.1.81]	1.66571e-06	0	0	0	4.8292e-06	3.49719e-06	1.84314e-07	1.77679e-06	9.55029e-07	6.28408e-07	0	0	8.33218e-06	8.11652e-07	0	1.1571e-06	0	0	0	0	6.59311e-07	0	4.3197e-06	3.35794e-07	1.98426e-06	0	0	0	1.44118e-06	1.38255e-07	2.10251e-06	0	0	0	9.40715e-07	1.14267e-06	0	6.65486e-07	0	2.66823e-07	0	6.2262e-06	0	9.05279e-08	0	0	6.81976e-06	2.09475e-06
K00841	aminotransferase [EC:2.6.1.-]	0.000102679	1.2703e-05	0.000128118	0.000633819	0.000402827	0.000357924	0.000814063	8.96506e-05	0.000289469	0.000332688	0.000122651	0.0002395	0.000372599	0.000908407	0.00062714	0.000856519	0.000871614	0.00058344	0.00130812	0.000418274	0.000257506	0.000731488	0.000222033	0.000325105	0.000892307	0.000386621	0.000679757	0.000628779	0.000504876	0.000461778	0.000261331	0.000419189	0.000747228	0.000314742	0.000796242	0.000754545	0.00045803	0.00023831	0.000304897	0.000806554	0.000556254	0.000585119	0.000761004	0.000124072	1.13994e-05	0.0009218	0.000701461	0.000183081
K00842		0	0	0	0	0	0	0	0	0	0	0	0	0	0	0	0	0	0	0	0	0	0	0	4.50033e-06	0	0	0	0	6.22795e-06	0	0	0	0	0	0	0	0	0	0	0	0	0	0	0	0	0	0	0
K00844	hexokinase [EC:2.7.1.1]	0.000119336	2.30575e-05	0.00019032	0.00011503	0.000117545	6.67829e-05	9.41162e-05	7.62282e-05	2.40961e-05	4.84772e-05	0.00029358	1.33623e-05	0.000109017	3.67441e-05	0.000196066	4.26302e-05	1.81558e-05	1.79748e-05	1.43251e-05	5.87156e-05	0.00022225	0.000204705	8.6826e-05	0.000124862	0.00010659	8.93068e-05	2.63641e-05	0.000100653	0.000148493	0.000112183	8.73383e-05	2.10937e-05	4.61491e-05	3.01035e-05	8.6487e-05	5.05451e-05	4.61506e-05	9.25025e-05	2.17606e-05	2.91015e-05	0.000113757	0.000145923	0.000170469	0.000143006	6.49154e-05	2.65153e-05	4.74948e-05	1.92717e-05
K00845	glucokinase [EC:2.7.1.2]	0.00126756	0.00118985	0.00151011	0.00143452	0.00137045	0.00124129	0.00132467	0.00120662	0.00115436	0.00122907	0.00161829	0.00115944	0.00147028	0.00134884	0.00142925	0.00127246	0.00112462	0.00100112	0.00139781	0.0012456	0.00154719	0.00157843	0.00129126	0.00151265	0.00129544	0.00122461	0.00128309	0.00128718	0.0014657	0.0012974	0.00123109	0.00128979	0.00132258	0.00102904	0.00120133	0.00115352	0.00126291	0.00117582	0.00108136	0.00119118	0.00152384	0.00139881	0.00158154	0.00149084	0.00134125	0.00124355	0.00131297	0.00112758
K00847	fructokinase [EC:2.7.1.4]	0.00113313	0.000906926	0.00126624	0.00127466	0.00126762	0.00108119	0.0011634	0.000995415	0.000995796	0.00104566	0.00144165	0.000979018	0.00124537	0.000969129	0.00124314	0.00100958	0.000884089	0.000855373	0.000929055	0.000984046	0.00134086	0.0014261	0.00112329	0.00114096	0.00112598	0.00105358	0.000958324	0.00113211	0.00123497	0.00114521	0.00109773	0.000886231	0.000980203	0.00088334	0.00107479	0.00100864	0.000972247	0.00107564	0.000916121	0.000914071	0.00114938	0.00127905	0.00136031	0.00131377	0.00111384	0.00104163	0.00103915	0.000944507
K00848	rhamnulokinase [EC:2.7.1.5]	0.000501389	0.00044845	0.000729579	0.000526977	0.000526743	0.000414372	0.000424272	0.000529416	0.00038672	0.000385777	0.000747966	0.000512245	0.000657091	0.000349295	0.0006241	0.000322196	0.00021357	0.000169248	0.000222312	0.000495588	0.000651789	0.000590593	0.00042375	0.000430036	0.000416646	0.000501551	0.000255501	0.000415261	0.000525811	0.000513268	0.000530232	0.000265253	0.000254962	0.000457081	0.000363226	0.000438259	0.00032807	0.000592953	0.000389838	0.0002561	0.000410799	0.000490787	0.000484113	0.000721915	0.0005243	0.000243378	0.000290511	0.000442536
K00849	galactokinase [EC:2.7.1.6]	0.000673284	0.000738807	0.000739091	0.00082806	0.000813057	0.000718359	0.000840166	0.000697667	0.000730573	0.000706744	0.000652545	0.000623583	0.000669303	0.000808785	0.000746305	0.000822435	0.000618493	0.000756599	0.000753502	0.000635063	0.000715631	0.000764011	0.000691192	0.000752967	0.000839674	0.000776194	0.000790101	0.000748816	0.000773034	0.000807171	0.000580021	0.000595484	0.000767795	0.000673097	0.00083869	0.000779299	0.000606767	0.000684258	0.000703823	0.000769489	0.000738528	0.000799149	0.000870835	0.000714283	0.000726103	0.000844154	0.000756971	0.000752545
K00850		0.00208293	0.00237697	0.00207099	0.0016182	0.00167745	0.00190192	0.00162813	0.00219239	0.00194754	0.00192267	0.00191731	0.00199238	0.00170665	0.00169053	0.00183006	0.00171565	0.00141605	0.00140312	0.00129144	0.00185018	0.00188292	0.00154026	0.00181296	0.00203537	0.00163567	0.00203231	0.00171338	0.00166661	0.00172722	0.00179926	0.00186118	0.00172254	0.00166126	0.00212154	0.00162136	0.00172275	0.00160236	0.00202277	0.0020457	0.00166982	0.00176793	0.0015727	0.00159622	0.00198567	0.00214723	0.0014617	0.00172056	0.0020837
K00851	gluconokinase [EC:2.7.1.12]	7.8328e-05	7.86375e-06	5.98017e-05	0.000360666	0.000306089	0.000217767	0.000390794	6.49301e-05	0.000205978	0.000221684	5.88484e-05	0.000119878	0.000187174	0.000415126	0.000295241	0.000384512	0.000390028	0.000102898	0.0006296	0.000221233	0.000119019	0.000375568	0.000145334	0.000154131	0.000469149	0.000210727	0.000381349	0.00030608	0.00028139	0.00024365	0.000167517	0.000266386	0.000402713	0.00015455	0.000315676	0.000343828	0.000239611	0.000115994	0.00014001	0.000392328	0.00028006	0.000382528	0.000392952	7.31142e-05	3.3791e-06	0.000499221	0.00036406	0.000127738
K00852	ribokinase [EC:2.7.1.15]	0.00064931	0.000596577	0.000904719	0.000926999	0.000767008	0.000673198	0.000973412	0.000692726	0.000676605	0.000603263	0.000802058	0.000639161	0.000874318	0.001132	0.00113172	0.00112459	0.00102303	0.00124603	0.00133907	0.000922373	0.000945435	0.00103463	0.000693084	0.000874108	0.00111055	0.000844572	0.000952677	0.000860328	0.000962682	0.00088192	0.0006795	0.000711428	0.0010335	0.000771375	0.00121501	0.00101921	0.000811258	0.000723516	0.000859394	0.000986597	0.000922328	0.000995326	0.00107153	0.000728694	0.000522173	0.00102373	0.000849591	0.000692261
K00853	L-ribulokinase [EC:2.7.1.16]	6.22658e-06	6.04904e-06	2.15668e-05	5.26364e-06	3.46264e-05	1.77101e-05	1.4777e-05	2.07035e-05	1.11665e-05	4.48863e-06	2.57082e-05	8.49168e-05	0.000147344	8.09622e-05	5.38789e-05	4.75935e-05	5.55065e-05	0.000378886	8.56338e-05	8.19792e-05	1.92196e-05	3.01492e-05	1.25751e-05	2.76891e-05	4.29496e-05	2.12252e-05	2.07443e-05	9.2519e-06	3.99927e-05	1.07355e-05	1.70514e-05	7.17289e-05	8.8415e-05	4.01204e-05	0.000201607	8.48429e-05	6.875e-05	3.46053e-05	1.37173e-05	3.67772e-05	6.90009e-06	5.53449e-05	3.63167e-05	6.1192e-05	0.000110737	1.38051e-05	4.89783e-05	2.1911e-05
K00854	xylulokinase [EC:2.7.1.17]	0.000635676	0.000705635	0.000779806	0.000413852	0.00046955	0.000567352	0.000574644	0.000767042	0.000699729	0.000543932	0.000580217	0.000841793	0.000949775	0.000645742	0.000774569	0.000742861	0.000721044	0.000377201	0.000698516	0.000944357	0.000555178	0.000565892	0.00054619	0.000553606	0.000543662	0.000689615	0.000523036	0.000538704	0.000516122	0.000593847	0.000691963	0.000670631	0.000587963	0.000848334	0.000488827	0.000739885	0.000711692	0.000782672	0.000861834	0.000606184	0.000476359	0.000474181	0.000370381	0.000754443	0.000961253	0.000496047	0.000574897	0.000805095
K00855	phosphoribulokinase [EC:2.7.1.19]	8.32855e-07	0	5.26018e-07	0	2.4146e-06	3.99039e-06	9.21568e-08	8.88395e-07	9.18297e-07	3.14204e-07	2.64872e-06	4.92535e-06	5.07897e-06	7.10195e-07	0	5.78552e-07	0	0	0	0	3.29655e-07	5.04288e-07	3.02379e-06	1.67897e-07	9.92128e-07	0	3.9754e-07	6.57718e-07	1.64706e-06	6.91273e-08	1.05125e-06	0	0	0	4.70358e-07	5.71333e-07	0	3.32743e-07	0	1.33412e-07	6.44514e-07	3.1131e-06	0	4.5264e-08	0	0	5.93408e-06	1.04737e-06
K00856	adenosine kinase [EC:2.7.1.20]	0	0	0	2.43925e-06	0	0	0	0	1.10196e-06	0	0	0	0	0	0	2.13151e-07	0	2.85477e-07	0	0	1.27048e-06	0	1.24791e-06	0	0	0	1.46367e-06	1.90738e-06	0	2.6759e-06	0	0	0	2.37243e-07	0	1.37477e-06	0	3.19433e-06	8.10565e-07	0	3.79126e-07	4.48867e-07	0	2.02071e-06	0	0	0	1.61295e-06
K00857	thymidine kinase [EC:2.7.1.21]	0.000362986	0.000166787	0.000390297	0.000663261	0.000607991	0.000403242	0.000608418	0.000269097	0.000369707	0.000401173	0.000498637	0.000240477	0.000484581	0.000520142	0.000509082	0.000571818	0.000546583	0.000623	0.000648536	0.000367367	0.000525329	0.000681779	0.000471987	0.000423134	0.000612591	0.000427318	0.000511959	0.000589491	0.000561352	0.000539996	0.000366026	0.000415914	0.000527894	0.000250706	0.000614765	0.000472405	0.00047353	0.000323165	0.000220359	0.000516072	0.000498721	0.000684463	0.000720872	0.00044346	0.000307203	0.00062572	0.000474586	0.000315605
K00858	NAD+ kinase [EC:2.7.1.23]	0.000809247	0.000786301	0.000762828	0.000878878	0.000865382	0.00085503	0.000866263	0.000776676	0.000842321	0.000861221	0.000791983	0.000826947	0.000835831	0.000858347	0.000806523	0.000864144	0.000873361	0.000854551	0.000918795	0.000814335	0.000807732	0.000847705	0.000845597	0.000796801	0.000876031	0.00081873	0.000849308	0.000862097	0.000821442	0.00084389	0.000807746	0.000849886	0.000852458	0.000802855	0.000863156	0.000852439	0.000864652	0.000800036	0.000817029	0.000877668	0.000873582	0.00087667	0.000873732	0.000803316	0.000825665	0.000900934	0.000840624	0.000792041
K00859	dephospho-CoA kinase [EC:2.7.1.24]	0.000804092	0.000786159	0.000757995	0.000878735	0.000865073	0.000852788	0.000853258	0.000774011	0.000836187	0.000858662	0.000791983	0.000824576	0.000831603	0.000846521	0.000803361	0.00085507	0.000868873	0.00085157	0.000914747	0.000810653	0.000801391	0.000846624	0.000844877	0.000794465	0.000876031	0.000817198	0.00084732	0.000861044	0.000816089	0.000839492	0.000806905	0.000846952	0.000850319	0.000800984	0.000861451	0.000851689	0.000861975	0.000796276	0.000801878	0.000869545	0.000867074	0.00087667	0.000873732	0.000798789	0.000822082	0.000897697	0.000839812	0.000779514
K00860	adenylylsulfate kinase [EC:2.7.1.25]	0.000120169	2.31999e-05	0.00019032	0.000115172	0.000119959	6.88005e-05	9.56123e-05	7.77346e-05	2.51467e-05	5.55692e-05	0.000295286	1.99568e-05	0.000113856	4.89754e-05	0.000196526	4.32087e-05	2.08406e-05	1.84143e-05	1.43251e-05	5.99145e-05	0.000223605	0.000204705	8.84578e-05	0.00012503	0.000107582	8.97359e-05	2.56232e-05	9.87454e-05	0.000149574	0.000115982	0.00011138	3.62893e-05	4.87811e-05	3.01035e-05	8.69574e-05	4.97416e-05	4.66337e-05	8.96409e-05	2.55952e-05	3.85677e-05	0.000114199	0.000148587	0.000170469	0.00014103	6.49154e-05	3.05616e-05	5.17164e-05	2.1304e-05
K00863	triose/dihydroxyacetone kinase / FAD-AMP lyase (cyclizing) [EC:2.7.1.28 2.7.1.29 4.6.1.15]	5.26483e-06	3.72728e-06	8.44917e-06	8.2592e-06	2.11663e-05	1.56365e-05	2.11289e-05	7.6093e-06	1.26512e-05	9.94231e-06	3.05869e-05	6.13731e-05	3.15765e-05	5.01364e-05	3.01164e-05	4.31706e-05	6.75186e-05	0.000438736	4.65214e-05	3.62227e-05	2.6015e-05	8.64493e-06	3.03579e-05	2.55471e-05	4.07413e-05	2.28631e-05	2.71863e-05	1.3834e-05	5.40185e-05	2.36133e-05	1.99003e-05	5.85642e-05	7.63025e-05	3.29767e-05	0.000197954	6.46231e-05	6.11548e-05	2.0447e-05	3.063e-06	4.54667e-05	1.82928e-06	4.2134e-05	3.53321e-05	5.92554e-06	8.1017e-06	2.98595e-05	3.2106e-05	9.10167e-06
K00864	glycerol kinase [EC:2.7.1.30]	0.000483155	0.000623751	0.000476244	0.000424892	0.000297073	0.000474183	0.000545852	0.000529725	0.000543495	0.000489577	0.000310659	0.000692614	0.000653113	0.00073893	0.000546461	0.000737566	0.000914507	0.000857419	0.000935249	0.000811483	0.000461514	0.000422665	0.000548002	0.000498531	0.000542326	0.000525734	0.000627715	0.000590258	0.000418559	0.000509667	0.000611547	0.000709776	0.000675613	0.000718081	0.000666005	0.000677022	0.000769743	0.000605196	0.000780528	0.000736171	0.000557208	0.000389396	0.00040115	0.000497388	0.000544422	0.000612843	0.000541152	0.000594384
K00865	glycerate 2-kinase [EC:2.7.1.165]	0.000584644	0.000634538	0.000723349	0.000802804	0.000765082	0.000587035	0.000769853	0.000655597	0.000620951	0.000591716	0.000550386	0.000530256	0.000747019	0.000804023	0.000726936	0.000721046	0.00064454	0.000686744	0.000765187	0.000647994	0.000649678	0.000732523	0.000637348	0.000689378	0.000772508	0.000690687	0.000747167	0.000703835	0.000680841	0.000742294	0.000594083	0.000543006	0.000661852	0.00060087	0.000770145	0.000719238	0.000578808	0.000647889	0.000616464	0.000666193	0.000612437	0.000772494	0.000775802	0.000674347	0.000713042	0.000763434	0.000695114	0.000659196
K00867	type I pantothenate kinase [EC:2.7.1.33]	7.97954e-05	1.23827e-05	7.63713e-05	0.000436796	0.000313384	0.000206738	0.000409243	6.53936e-05	0.000219032	0.000230572	7.39305e-05	0.000172661	0.000246704	0.000540019	0.000328707	0.000463439	0.000386773	0.000486697	0.00079492	0.000259082	0.000201466	0.000401467	0.000196642	0.000209217	0.000530725	0.000207923	0.000409141	0.000279508	0.000260184	0.000225216	0.000163113	0.000301876	0.000498758	0.000151809	0.000524162	0.000365717	0.000292011	0.000114231	0.000104095	0.000421857	0.000501697	0.00040587	0.000536401	9.87369e-05	1.15215e-05	0.000544302	0.000350421	0.00012204
K00868	pyridoxine kinase [EC:2.7.1.35]	0.000653038	0.000717108	0.000658575	0.000510979	0.000667059	0.000555751	0.00054738	0.000724351	0.000616548	0.000550928	0.000570269	0.000688661	0.00047378	0.000589699	0.0005963	0.000589147	0.000488005	0.00111511	0.000418886	0.000613569	0.000602372	0.000526035	0.000573212	0.000680978	0.000624953	0.000635002	0.000683308	0.000533026	0.000597291	0.000573616	0.000643273	0.000494374	0.000629082	0.000706673	0.000830233	0.000648502	0.000544301	0.000657098	0.000677755	0.000551838	0.000473519	0.000675528	0.000560675	0.000504218	0.000526407	0.000542957	0.000658564	0.000623784
K00869	mevalonate kinase [EC:2.7.1.36]	7.4719e-05	7.86375e-06	5.08594e-05	0.000322922	0.000300541	0.000187952	0.000302076	6.39644e-05	0.000191579	0.000198882	6.03675e-05	0.000130184	0.000175945	0.000381037	0.000252777	0.000338045	0.000290461	0.000466301	0.000530099	0.000191632	0.000124039	0.000308282	0.000142262	0.000140592	0.000434008	0.000187701	0.000325585	0.000231363	0.000236868	0.000196901	0.000150664	0.000246961	0.000405077	0.000138629	0.000459547	0.000320939	0.000208733	0.000101919	9.37762e-05	0.000328299	0.000268687	0.000373254	0.000380265	6.35312e-05	1.13994e-05	0.000430386	0.000301797	0.000115337
K00872	homoserine kinase [EC:2.7.1.39]	6.16908e-05	5.35518e-05	5.93908e-05	0.000110964	0.000106204	9.71704e-05	0.000240393	7.04536e-05	7.48019e-05	9.02686e-05	9.57845e-05	0.000209526	0.000227533	0.000236478	0.000162279	0.000264044	0.000298408	0.000549262	0.000351572	0.000201237	0.000120666	0.000174096	0.000126147	0.000114613	0.00020461	0.000163488	0.000185226	0.000221026	0.000164835	0.000147039	0.000160621	0.000241363	0.000201174	0.000188496	0.000333557	0.000277303	0.000277249	0.000123206	0.00011342	0.000276307	6.75318e-05	0.000142813	0.000166587	0.000123915	0.00014925	0.000235254	0.000169653	0.000105523
K00873	pyruvate kinase [EC:2.7.1.40]	0.000822524	0.000811574	0.000774433	0.000902471	0.000893432	0.000883444	0.000937238	0.000790118	0.000858125	0.000896344	0.000822843	0.000895344	0.00084891	0.000887606	0.000813926	0.000883259	0.000947049	0.000919396	0.000962764	0.000851215	0.000845571	0.000910687	0.000913416	0.000827455	0.000897682	0.000866362	0.000890588	0.000941615	0.000885703	0.000887065	0.000881008	0.000958681	0.000892491	0.000826791	0.000872555	0.000867588	0.000927324	0.000811449	0.000826764	0.000908044	0.000881256	0.000901788	0.000975903	0.00088524	0.00084486	0.000953001	0.000866456	0.000808307
K00874	2-dehydro-3-deoxygluconokinase [EC:2.7.1.45]	0.000791004	0.000786924	0.000877966	0.000679444	0.000527462	0.000656889	0.000569128	0.000863655	0.000757262	0.000652606	0.00062128	0.000433987	0.000745026	0.000774403	0.000721651	0.000601076	0.000579736	0.000395072	0.000619543	0.000733536	0.000767337	0.000553384	0.00071965	0.00071552	0.000599758	0.000754518	0.000612202	0.00068874	0.000526558	0.000693583	0.000722336	0.000566605	0.000516129	0.000869606	0.000555147	0.000621203	0.000682278	0.000862123	0.0007544	0.00056279	0.000761269	0.000543561	0.000492217	0.000842031	0.000705754	0.000501359	0.000566697	0.00083549
K00876	uridine kinase [EC:2.7.1.48]	0.00102439	0.000863257	0.00107585	0.00115906	0.00109941	0.000936283	0.00105682	0.000975718	0.000946811	0.000914762	0.0011068	0.000907254	0.00112372	0.000971891	0.00105255	0.000982095	0.000974293	0.000935748	0.00099211	0.000958643	0.00113079	0.0011687	0.00105849	0.000987903	0.00101147	0.000983609	0.000956679	0.00105958	0.00104846	0.00105663	0.000999817	0.000856117	0.000856757	0.000899202	0.000955774	0.000977454	0.0010215	0.00101063	0.000891544	0.000949941	0.000976275	0.00111059	0.00109645	0.00110038	0.000971248	0.001008	0.000903928	0.000912136
K00878	hydroxyethylthiazole kinase [EC:2.7.1.50]	0.00039634	0.000598825	0.000332027	0.000259509	0.000281767	0.000482803	0.000389653	0.000477229	0.000495774	0.000514743	0.000325944	0.000683918	0.000403559	0.000427566	0.000363596	0.000505077	0.000544117	0.000325918	0.000458905	0.000516761	0.000301826	0.000297599	0.000383593	0.000404018	0.000369981	0.000433918	0.000441441	0.000419123	0.000355928	0.000363508	0.000565831	0.000580701	0.000428618	0.000619012	0.000327565	0.000498588	0.000497902	0.000507264	0.000652181	0.000522603	0.000351737	0.000265027	0.000217957	0.00040274	0.000359725	0.00039656	0.000474933	0.00051589
K00879	L-fuculokinase [EC:2.7.1.51]	3.28383e-05	7.42548e-05	3.79992e-05	1.98636e-05	6.96807e-05	0.000114555	2.66411e-05	4.0332e-05	6.3087e-05	0.000119024	0.000106728	0.000326419	6.25745e-05	1.73264e-05	3.32407e-05	6.48182e-05	4.57204e-05	2.90633e-05	2.99877e-05	8.86871e-05	1.34189e-05	1.45404e-05	2.651e-05	6.14848e-05	1.83598e-05	5.03812e-05	5.89624e-05	1.90006e-05	9.69537e-05	1.78899e-05	0.000115316	0.00014398	0.000107806	4.7119e-05	3.42676e-05	5.30268e-05	1.91639e-05	3.82155e-05	7.47488e-05	5.18082e-05	5.76586e-05	4.0818e-05	3.85889e-05	7.40304e-05	5.24302e-05	4.71359e-05	8.06118e-05	6.84843e-05
K00880	L-xylulokinase [EC:2.7.1.53]	8.32855e-07	0	0	0	2.4146e-06	1.7486e-06	9.21568e-08	8.88395e-07	4.77515e-07	0	0	0	4.16609e-06	4.05826e-07	0	7.03398e-06	0	0	0	0	3.29655e-07	0	2.15985e-06	4.50033e-06	9.92128e-07	0	0	0	1.47721e-05	6.91273e-08	1.05125e-06	0	0	0	9.40715e-07	5.71333e-07	0	3.32743e-07	0	0	0	3.1131e-06	0	0	0	0	3.40988e-06	1.04737e-06
K00881	allose kinase [EC:2.7.1.55]	0	0	0	0	0	0	0	0	0	0	0	0	0	0	0	0	0	0	0	0	0	0	0	0	0	0	0	0	0	0	0	0	0	0	0	0	0	0	0	0	0	0	0	0	0	0	0	0
K00882	1-phosphofructokinase [EC:2.7.1.56]	0.000553997	0.000611946	0.000449581	0.000792919	0.000999927	0.000699472	0.000665994	0.000650701	0.000830141	0.000706391	0.000212315	0.000565205	0.000590571	0.000778008	0.000589515	0.00080207	0.000674493	0.000860677	0.000940766	0.000788634	0.00046574	0.000581192	0.000652875	0.000549035	0.000948955	0.000799928	0.000937769	0.000651799	0.000692409	0.000715141	0.00048917	0.000730477	0.000903	0.00079931	0.000834179	0.000844978	0.000772764	0.000625975	0.000725511	0.000850123	0.000523741	0.0010578	0.000737374	0.000462182	0.000584361	0.000978381	0.000755775	0.000795867
K00883	2-dehydro-3-deoxygalactonokinase [EC:2.7.1.58]	3.21244e-06	0	6.41085e-06	0	4.8292e-06	6.18734e-06	1.84314e-07	1.77679e-06	9.55029e-07	1.34659e-06	0	0	9.00483e-06	5.88447e-06	5.17513e-07	1.1571e-06	0	0	0	0	6.59311e-07	0	4.3197e-06	1.68762e-06	1.98426e-06	0	2.85506e-06	0	7.30883e-06	1.38255e-07	2.56506e-06	8.59937e-07	0	0	9.40715e-07	1.49975e-06	0	6.65486e-07	8.10565e-07	0	0	6.2262e-06	0	0	4.47833e-07	0	1.00525e-05	4.9436e-06
K00884	N-acetylglucosamine kinase [EC:2.7.1.59]	8.32855e-07	0	0	0	2.4146e-06	1.7486e-06	9.21568e-08	8.88395e-07	4.77515e-07	3.14204e-07	6.23229e-07	4.92535e-06	4.59851e-06	4.05826e-07	0	5.78552e-07	0	0	0	0	3.29655e-07	0	2.15985e-06	1.67897e-07	9.92128e-07	0	0	0	7.20589e-07	6.91273e-08	1.05125e-06	0	0	0	4.70358e-07	5.71333e-07	0	3.32743e-07	0	1.33412e-07	0	3.1131e-06	0	4.5264e-08	0	0	3.40988e-06	1.04737e-06
K00885	N-acylmannosamine kinase [EC:2.7.1.60]	0	0	0	0	0	0	0	0	0	3.14204e-07	0	0	0	0	0	0	0	0	0	0	0	0	0	1.67897e-07	0	0	0	0	0	0	0	0	0	0	0	0	0	0	0	1.33412e-07	0	0	0	4.5264e-08	0	0	0	0
K00886	polyphosphate glucokinase [EC:2.7.1.63]	2.08214e-07	2.75765e-07	5.58895e-07	1.4122e-06	6.0365e-07	2.64531e-06	2.09937e-05	3.57289e-07	4.13234e-07	1.81789e-06	7.98512e-07	6.27071e-07	4.08393e-07	3.72007e-07	5.03138e-07	5.32877e-07	2.44522e-07	1.2244e-06	0	3.78212e-07	8.69274e-07	2.9717e-07	8.81939e-06	3.19134e-06	1.44819e-06	3.35236e-07	1.17274e-05	7.13624e-06	3.80883e-06	1.30078e-06	3.25889e-07	1.44166e-06	8.4044e-06	2.17472e-07	1.18324e-06	1.16945e-06	7.03642e-07	1.99646e-07	5.45573e-07	1.68988e-07	0	9.69146e-07	9.278e-07	2.2632e-06	2.64629e-07	5.45064e-06	3.40988e-06	8.94456e-06
K00887	undecaprenol kinase [EC:2.7.1.66]	1.04702e-05	5.47972e-06	2.19613e-05	6.69723e-05	5.01929e-05	5.19198e-05	0.000124007	2.25575e-05	2.29795e-05	4.04336e-05	3.67627e-05	7.8377e-05	5.98656e-05	0.000157494	0.000112818	0.000163718	0.000148929	0.000428808	0.000160321	5.61895e-05	3.51722e-05	9.8066e-05	2.24144e-05	5.82446e-05	0.000162517	7.4679e-05	8.86333e-05	0.000113413	8.80148e-05	6.92388e-05	9.8471e-05	8.05508e-05	0.000139916	7.43097e-05	0.000309378	0.000183766	6.03063e-05	5.61337e-05	5.4682e-05	0.000137147	1.80464e-05	8.82637e-05	0.000102569	1.08714e-05	1.6407e-05	0.000124341	0.000125767	2.22671e-05
K00891	shikimate kinase [EC:2.7.1.71]	0.00096859	0.00111623	0.000946984	0.000698666	0.000688974	0.000849739	0.00072377	0.00098766	0.000931889	0.000871701	0.000796904	0.000993608	0.000816142	0.000698001	0.000741546	0.000735021	0.000725757	0.000476144	0.000483569	0.000879404	0.000758084	0.000597029	0.000839873	0.000737308	0.000621094	0.000855558	0.000624011	0.000742315	0.000659103	0.000875934	0.000932351	0.000754775	0.000572165	0.000977565	0.000591789	0.000769462	0.000719895	0.00100099	0.00115358	0.000750707	0.000755813	0.000570646	0.00058138	0.000908216	0.00114794	0.000632916	0.000632362	0.00095916
K00892	inosine kinase [EC:2.7.1.73]	8.32855e-07	0	0	0	2.4146e-06	1.7486e-06	9.21568e-08	8.88395e-07	4.77515e-07	3.14204e-07	6.23229e-07	4.92535e-06	4.59851e-06	4.05826e-07	0	5.78552e-07	0	0	0	0	3.29655e-07	0	2.15985e-06	1.67897e-07	9.92128e-07	0	0	0	7.20589e-07	6.91273e-08	1.05125e-06	0	0	0	4.70358e-07	5.71333e-07	0	3.32743e-07	0	1.33412e-07	0	3.1131e-06	0	4.5264e-08	0	0	3.40988e-06	1.04737e-06
K00895	diphosphate-dependent phosphofructokinase [EC:2.7.1.90]	0.000223433	0.000117485	0.000313877	0.000301076	0.000280762	0.000175129	0.00021799	0.000190522	0.000132455	0.00014992	0.000394913	4.35187e-05	0.000271798	0.000102006	0.000241125	0.000102982	3.28729e-05	2.85155e-05	3.85845e-05	9.5709e-05	0.00033467	0.000320403	0.000219237	0.000236635	0.000156244	0.000177905	0.000105249	0.000204331	0.000254432	0.000226513	0.000175055	6.41791e-05	7.38105e-05	6.8886e-05	0.000123991	0.000116141	0.000121523	0.000190786	7.54683e-05	6.6777e-05	0.000207486	0.000258629	0.000275831	0.000325486	0.000222746	0.000107192	0.00014523	0.00013509
K00897	kanamycin kinase [EC:2.7.1.95]	6.33069e-05	3.37145e-06	9.43545e-06	0.000135571	0.000245506	0.000122491	8.59771e-05	5.19615e-05	0.000137937	0.000123594	1.44316e-05	1.73186e-05	4.55238e-05	5.69847e-05	6.23172e-05	5.05015e-05	4.2883e-05	1.90103e-05	8.405e-05	6.68579e-05	1.60481e-05	0.000107278	7.64467e-05	3.27031e-05	0.000166398	9.94501e-05	0.000157263	8.273e-05	0.000134853	9.38794e-05	2.27386e-05	9.15327e-05	0.000160096	5.61277e-05	7.93802e-05	9.34754e-05	6.60182e-05	4.22583e-05	2.95389e-05	9.28101e-05	1.59612e-05	0.000253763	0.000108098	2.48952e-05	3.39946e-06	0.000183251	0.000132941	0.000101239
K00899	5-methylthioribose kinase [EC:2.7.1.100]	1.76486e-05	1.99736e-05	3.13967e-05	0.000113874	1.28436e-05	2.52425e-05	0.000114814	8.57494e-06	5.19514e-05	3.69414e-05	1.6431e-05	4.04367e-05	7.79652e-05	0.000167538	7.6707e-05	0.000142902	0.000106978	2.07135e-05	0.000272846	7.16556e-05	7.79625e-05	9.31852e-05	5.97078e-05	8.10007e-05	9.67165e-05	1.96161e-05	8.9338e-05	4.91973e-05	3.52059e-05	3.43355e-05	3.91067e-05	7.97718e-05	0.00010443	1.7266e-05	6.61735e-05	4.52781e-05	8.59271e-05	2.21996e-05	4.06009e-05	0.000109887	0.000238129	3.26159e-05	0.000156022	3.72264e-05	6.43251e-06	0.000123619	5.24028e-05	2.04866e-05
K00901	diacylglycerol kinase (ATP) [EC:2.7.1.107]	0.000134704	0.000183802	0.00018423	0.000222699	0.000238557	0.000149808	0.000202019	0.000170852	0.000143851	0.000147979	0.000146566	0.000285454	0.000329944	0.00013339	9.20239e-05	0.000120681	0.000277548	0.000159803	0.000199865	0.00024162	0.000181414	0.000173691	0.000242491	0.000156208	7.04251e-05	0.000151191	0.000164347	0.0002311	0.000192822	0.000236319	0.000165941	0.000200163	9.54781e-05	0.00010873	7.96815e-05	0.00016225	0.00029464	0.000162628	0.000111577	0.00014702	0.000177791	0.000181956	0.000181517	0.000310275	0.000333177	0.000202935	0.000137347	0.000161411
K00906	isocitrate dehydrogenase kinase/phosphatase [EC:2.7.11.5 3.1.3.-]	8.32855e-07	0	0	0	2.4146e-06	1.7486e-06	9.21568e-08	8.88395e-07	4.77515e-07	3.14204e-07	6.23229e-07	4.92535e-06	4.59851e-06	4.05826e-07	0	5.78552e-07	0	0	0	0	3.29655e-07	0	2.15985e-06	1.67897e-07	9.92128e-07	0	0	0	7.20589e-07	6.91273e-08	1.05125e-06	0	0	0	4.70358e-07	5.71333e-07	0	3.32743e-07	0	1.33412e-07	0	3.1131e-06	0	4.5264e-08	0	0	3.40988e-06	1.04737e-06
K00912	tetraacyldisaccharide 4'-kinase [EC:2.7.1.130]	0.000261685	0.000146745	0.000317751	0.00030425	0.00032568	0.00027713	0.00022579	0.000190934	0.00018849	0.000251393	0.000496928	0.000211391	0.00029065	0.000105095	0.000253191	0.000119902	3.42584e-05	3.5153e-05	3.75638e-05	9.12276e-05	0.000338176	0.000338581	0.000232116	0.000281828	0.000160458	0.000184188	0.000123843	0.000199873	0.000318857	0.000249699	0.000225865	0.000196778	0.000155841	6.39039e-05	0.000135505	0.000113999	0.000121275	0.000187725	9.92138e-05	0.000108748	0.000264519	0.000276106	0.000316806	0.000347342	0.000255431	0.000143498	0.000218336	0.00015904
K00917	tagatose 6-phosphate kinase [EC:2.7.1.144]	4.82858e-06	6.08747e-06	1.5797e-05	2.25951e-05	6.88418e-06	8.77661e-06	1.42757e-05	4.41301e-06	9.19216e-06	1.54656e-05	2.24394e-05	5.61477e-05	8.7204e-06	6.20575e-06	5.10326e-06	1.23886e-05	6.26129e-05	5.94557e-05	4.40928e-05	3.73097e-05	1.2128e-05	0	2.15745e-05	4.37051e-06	1.92025e-07	2.78725e-06	2.12232e-05	1.08962e-05	2.60699e-05	1.72818e-05	6.56509e-05	8.83585e-05	2.64513e-05	1.52231e-05	2.28564e-06	5.66155e-06	4.76821e-05	5.55414e-06	2.02978e-05	2.88792e-05	1.22268e-06	6.33515e-06	4.92302e-07	1.96009e-06	8.54954e-07	2.05687e-05	5.28443e-06	9.62535e-06
K00918	ADP-dependent phosphofructokinase/glucokinase [EC:2.7.1.146 2.7.1.147]	0	3.00673e-06	1.94298e-05	0	0	0	1.31991e-05	3.84327e-06	7.44445e-06	8.39373e-06	1.09065e-06	2.89593e-06	0	2.09677e-06	6.22454e-06	1.57275e-05	1.10341e-05	4.47871e-06	0	4.16747e-06	1.97258e-06	0	4.94366e-06	0	0	1.34861e-05	9.21569e-07	2.45548e-06	0	5.9836e-06	2.10251e-06	5.5643e-07	4.45245e-06	9.3579e-07	4.70358e-07	0	1.01407e-06	1.33097e-06	1.45434e-05	3.94899e-06	2.2558e-06	0	0	0	4.58011e-06	1.12107e-05	0	1.73864e-06
K00919	4-diphosphocytidyl-2-C-methyl-D-erythritol kinase [EC:2.7.1.148]	0.000742897	0.000787297	0.00073153	0.000621088	0.000608612	0.000715994	0.00068505	0.000723913	0.000670857	0.000702233	0.00076534	0.000768162	0.000718454	0.000629799	0.000662367	0.000677668	0.000727947	0.000796215	0.000546413	0.000672356	0.000716391	0.000635364	0.000714518	0.000710819	0.000587802	0.000701838	0.000608868	0.000735617	0.00066353	0.000718978	0.000756192	0.000679884	0.000580131	0.000729521	0.000677063	0.000701643	0.000708526	0.000747729	0.000778933	0.000680325	0.000623397	0.000598699	0.000592249	0.000759507	0.000823181	0.000592937	0.000658704	0.000695976
K00924	kinase [EC:2.7.1.-]	6.54386e-06	4.51899e-06	2.83721e-05	0.000118154	2.83073e-05	2.85604e-05	0.000114852	6.41189e-06	2.85407e-05	3.64477e-05	2.80453e-05	6.85901e-05	8.82129e-05	0.00020413	0.000100685	0.000160777	0.000109026	0.000397187	0.000269854	6.84207e-05	9.32129e-05	0.00010183	5.63961e-05	8.12222e-05	0.000135282	3.90023e-05	8.64107e-05	5.20036e-05	4.29265e-05	3.50096e-05	3.49858e-05	7.2437e-05	0.000147602	3.40048e-05	0.000258109	0.000100769	8.96523e-05	2.81168e-05	1.24079e-05	0.000113916	0.000233011	6.21885e-05	0.000191354	3.51604e-05	7.28746e-06	0.000124674	7.10761e-05	1.00548e-05
K00925	acetate kinase [EC:2.7.2.1]	0.000863343	0.000782731	0.000812805	0.00104848	0.001117	0.000907219	0.000982083	0.000848002	0.000944417	0.000894373	0.000742631	0.000747948	0.000915123	0.00101982	0.000923002	0.000995257	0.000969662	0.00165854	0.0010165	0.000907782	0.000873312	0.00099396	0.000937879	0.000833648	0.00115553	0.000984739	0.00100547	0.000999677	0.000942106	0.000955256	0.000793477	0.000838488	0.00108756	0.000916257	0.00137103	0.00108815	0.000960533	0.000885027	0.000855869	0.000987973	0.000843657	0.00120128	0.00107296	0.000847098	0.000840267	0.0010977	0.000974569	0.000898447
K00926	carbamate kinase [EC:2.7.2.2]	0.000240417	0.000351935	0.000351791	0.000185418	0.000162164	0.000249421	0.000279661	0.000337455	0.000351932	0.000244666	0.000100338	0.000403261	0.000340504	0.000368512	0.000348991	0.000327022	0.000390359	0.000166679	0.000338611	0.000458455	0.000138822	0.000178932	0.000180563	0.000150891	0.000272835	0.000352772	0.000289481	0.000245	0.000213655	0.00029752	0.000346904	0.000321826	0.000376394	0.000485425	0.000255794	0.000412459	0.000239287	0.000411065	0.000589317	0.000341706	0.000139923	0.000163755	0.000113211	0.000307835	0.000335875	0.000308242	0.000226646	0.000456383
K00927	phosphoglycerate kinase [EC:2.7.2.3]	0.000809247	0.000786159	0.000762828	0.000881317	0.000865382	0.00085503	0.000866263	0.000776676	0.000841219	0.000860906	0.000791983	0.000826947	0.000835831	0.000858347	0.000806523	0.000864357	0.000873162	0.00085354	0.000918795	0.000813365	0.000809002	0.000847705	0.000843629	0.000796801	0.000876031	0.00081873	0.000848422	0.000860189	0.000816449	0.000846566	0.000807746	0.000849886	0.000852458	0.000803093	0.000863156	0.000851064	0.000864196	0.000796842	0.00081784	0.000877668	0.00087381	0.000876221	0.000873732	0.000796769	0.000825665	0.000900934	0.000840624	0.000790428
K00928	aspartate kinase [EC:2.7.2.4]	0.000868003	0.00110133	0.000911987	0.000829622	0.000771405	0.000861811	0.000923542	0.00103382	0.000771695	0.000825909	0.000851341	0.00114202	0.00101074	0.000959634	0.000891525	0.000951212	0.00100947	0.0010239	0.00100322	0.00102619	0.000908208	0.000812396	0.000929363	0.0010426	0.000840514	0.000977486	0.000958279	0.000959625	0.000864085	0.000897854	0.000953397	0.00099019	0.000857873	0.000983997	0.000893993	0.000957968	0.000981291	0.000917533	0.00090437	0.000879411	0.000927484	0.000742643	0.000851465	0.00103661	0.00102849	0.000855643	0.000919996	0.00101334
K00929	butyrate kinase [EC:2.7.2.7]	0.000215928	6.79806e-05	0.000271031	0.000134244	0.000141948	0.000105812	0.000141939	0.000101219	6.54746e-05	9.5114e-05	0.000354559	0.000245333	0.000165856	8.61534e-05	0.000259519	8.11039e-05	0.00018061	0.000153194	0.000134575	0.000236575	0.000271782	0.000244796	0.000164869	0.00015762	0.000120416	0.000131834	0.000113895	0.000140313	0.000246493	0.000189951	0.000181499	0.000179853	0.000176558	9.17075e-05	9.78785e-05	0.000102965	0.000162169	0.000142614	8.1758e-05	0.000127417	0.000120941	0.00017667	0.000206634	0.000177843	0.000121342	0.00013191	7.33346e-05	7.52432e-05
K00930	acetylglutamate kinase [EC:2.7.2.8]	0.000719706	0.00077197	0.000706478	0.000548082	0.000561347	0.000648482	0.000550001	0.000706648	0.00063957	0.000653509	0.000710681	0.000682527	0.000644727	0.000473134	0.000545912	0.000513488	0.000418963	0.000277216	0.000328272	0.0005665	0.000647844	0.000536217	0.0006305	0.000643293	0.000441287	0.000613959	0.000477346	0.000542709	0.000533644	0.000571042	0.000705805	0.000578424	0.000425081	0.000645695	0.000394091	0.00052286	0.00055983	0.000689016	0.000714423	0.000507237	0.000602839	0.000471659	0.000491308	0.000730954	0.000779945	0.000429835	0.000537144	0.000650133
K00931	glutamate 5-kinase [EC:2.7.2.11]	0.000717088	0.000768038	0.000709437	0.000608763	0.000604245	0.00069686	0.000657765	0.000716941	0.000661477	0.000664551	0.000735657	0.000724571	0.000706034	0.000618927	0.000655467	0.000652782	0.000536777	0.000680928	0.000489543	0.000627798	0.000676095	0.000634067	0.000637651	0.000690676	0.000589466	0.000667665	0.000563594	0.000642112	0.000612497	0.00062233	0.000705639	0.000599093	0.000568795	0.000710291	0.000661372	0.000681405	0.00060923	0.000736033	0.00076036	0.000621829	0.000614686	0.000561474	0.000587136	0.000723437	0.000801502	0.00053254	0.000660033	0.000680569
K00932	propionate kinase [EC:2.7.2.15]	8.32855e-07	0	0	0	2.4146e-06	1.7486e-06	9.21568e-08	8.88395e-07	4.77515e-07	3.14204e-07	0	0	4.16609e-06	4.05826e-07	0	5.78552e-07	0	0	0	0	3.29655e-07	0	2.15985e-06	1.67897e-07	9.92128e-07	0	0	0	7.20589e-07	6.91273e-08	1.05125e-06	0	0	0	4.70358e-07	5.71333e-07	0	3.32743e-07	0	1.33412e-07	0	3.1131e-06	0	4.5264e-08	0	0	3.40988e-06	1.04737e-06
K00936	two-component system, sensor histidine kinase PdtaS [EC:2.7.13.3]	0.000805113	0.000800507	0.000827495	0.000648369	0.0006105	0.000747155	0.000718393	0.000713079	0.000816045	0.000745291	0.000772866	0.000779514	0.00069113	0.000593579	0.000661562	0.000597005	0.0008906	0.00050516	0.00054064	0.000725834	0.000714791	0.000653887	0.000786837	0.000716266	0.000525946	0.000745861	0.000660314	0.000784848	0.000736901	0.000791251	0.000711673	0.000746079	0.000567181	0.000732058	0.000490956	0.000603133	0.000737562	0.000753127	0.000801831	0.00067015	0.000581409	0.000572683	0.000604746	0.00086856	0.000816565	0.00065775	0.000643825	0.000689084
K00937	polyphosphate kinase [EC:2.7.4.1]	0.000819946	0.000769746	0.000904097	0.000781479	0.000666768	0.000714346	0.000823285	0.000729234	0.000662711	0.000743078	0.00100866	0.000667558	0.000719271	0.000731459	0.000858044	0.000743962	0.000565691	0.000316007	0.000651818	0.000636041	0.000927968	0.000871785	0.000732997	0.000810843	0.000734557	0.000736176	0.000632549	0.00075035	0.000722129	0.000753021	0.000805107	0.000602401	0.000618007	0.000674507	0.000604944	0.000670057	0.000619805	0.000781594	0.000740345	0.00067144	0.000928603	0.000623723	0.000827512	0.000812268	0.000736363	0.000651692	0.000673717	0.000651892
K00938	phosphomevalonate kinase [EC:2.7.4.2]	7.4719e-05	7.86375e-06	5.08594e-05	0.000322922	0.000300541	0.000187952	0.000302076	6.39644e-05	0.000191579	0.000198882	6.03675e-05	0.000130184	0.000175945	0.000381037	0.000252777	0.000338045	0.000290461	0.000466301	0.000530099	0.000191632	0.000124039	0.000308282	0.000142262	0.000140592	0.000434008	0.000187701	0.000325585	0.000231363	0.000236868	0.000196901	0.000150664	0.000246961	0.000405077	0.000138629	0.000459547	0.000320939	0.000208733	0.000101919	9.37762e-05	0.000328299	0.000268687	0.000373254	0.000380265	6.35312e-05	1.13994e-05	0.000430386	0.000301797	0.000115337
K00939	adenylate kinase [EC:2.7.4.3]	0.000809247	0.000786159	0.000762828	0.000878878	0.000865382	0.00085503	0.000866263	0.000776676	0.000842321	0.000860906	0.000791983	0.000826947	0.000835831	0.000858347	0.000806523	0.000864144	0.000873162	0.000853826	0.000918795	0.000813365	0.000807732	0.000847705	0.000844877	0.000796801	0.000876031	0.00081873	0.000849018	0.000862097	0.000816449	0.00084389	0.000807746	0.000849886	0.000852458	0.000802855	0.000863156	0.000852439	0.000864196	0.000800036	0.000817029	0.000877668	0.00087343	0.00087667	0.000873732	0.000798789	0.000825665	0.000900934	0.000840624	0.000792041
K00940	nucleoside-diphosphate kinase [EC:2.7.4.6]	0.000172599	6.88997e-05	0.000214939	0.000207108	0.000220927	0.00024366	0.000240953	0.000133024	0.000116462	0.000200023	0.000449496	0.000275289	0.00020926	0.000202941	0.000334261	0.000279647	0.000174354	0.000486319	0.000224204	0.000134822	0.000306882	0.00032529	0.000153821	0.000233406	0.000290923	0.000211877	0.000146909	0.000239884	0.000311767	0.000200724	0.000252431	0.000244841	0.000279952	0.000155407	0.000409613	0.000272858	0.000162624	0.000172935	0.000104366	0.000236574	0.000192893	0.000262008	0.000316096	0.000184058	0.00012561	0.000184259	0.000245637	9.86696e-05
K00941	hydroxymethylpyrimidine/phosphomethylpyrimidine kinase [EC:2.7.1.49 2.7.4.7]	0.00077287	0.000732118	0.000756088	0.000900061	0.000827634	0.000844314	0.000921148	0.000737732	0.000835002	0.000854016	0.000760724	0.000604771	0.000695416	0.000870894	0.000829193	0.000886784	0.000818756	0.000430153	0.000948043	0.000730308	0.000761794	0.000904086	0.000757631	0.000779763	0.000914972	0.000788166	0.000866781	0.000807078	0.00080703	0.000818432	0.00076209	0.000789109	0.000837263	0.000785267	0.000710458	0.00083795	0.000787458	0.000775014	0.000835657	0.000916846	0.000864294	0.00083314	0.000891871	0.000719012	0.000685798	0.000958939	0.000886502	0.000762568
K00942	guanylate kinase [EC:2.7.4.8]	0.000881151	0.000800641	0.000813326	0.0012048	0.0011633	0.00104975	0.00119017	0.00084516	0.00103619	0.0010536	0.000846282	0.000942009	0.00101221	0.00124757	0.0010614	0.00121633	0.00117791	0.00132725	0.00145224	0.00101034	0.000933977	0.00118714	0.000996066	0.000942024	0.00131285	0.00101292	0.0011913	0.00110227	0.00106541	0.00104601	0.000897817	0.00106572	0.00126368	0.000966685	0.00132691	0.00118045	0.00108113	0.000946576	0.000930695	0.00121689	0.00114504	0.00124992	0.00128516	0.000883538	0.000833766	0.00135714	0.00114616	0.000918103
K00943	dTMP kinase [EC:2.7.4.9]	0.000361221	0.000207387	0.000147066	0.000472964	0.000476579	0.00050271	0.000530515	0.000231665	0.00043988	0.000528523	0.000340908	0.00051654	0.000429504	0.000498213	0.000371575	0.000613966	0.000724559	0.000714401	0.000812703	0.000477989	0.000347646	0.000502844	0.00048549	0.000326496	0.000561302	0.000362465	0.000512094	0.000550141	0.000427833	0.00041448	0.000422986	0.000668199	0.000633403	0.000379964	0.000587151	0.000502462	0.000653283	0.000309492	0.000372291	0.000648562	0.000570057	0.000557444	0.00058654	0.000304089	0.000444996	0.000658127	0.000500625	0.000327217
K00945	CMP/dCMP kinase [EC:2.7.4.25]	0.00110954	0.00131242	0.0011222	0.00104025	0.0010311	0.00108383	0.00105796	0.00120478	0.00130936	0.00108547	0.00087856	0.00113004	0.00103215	0.00116977	0.001055	0.00111559	0.00104058	0.00105593	0.00106139	0.00112064	0.00100195	0.000919755	0.00106791	0.00106237	0.00109013	0.00119397	0.00117007	0.0010266	0.000963964	0.00114985	0.00106008	0.000999734	0.0010565	0.00130102	0.00107909	0.00117093	0.00103806	0.00119744	0.00128136	0.00113846	0.00102702	0.000986571	0.000937239	0.00103008	0.0012002	0.00112209	0.00105633	0.00125295
K00946	thiamine-monophosphate kinase [EC:2.7.4.16]	0.000271858	0.000148489	0.000317751	0.000307031	0.000326091	0.000278184	0.000230506	0.000191282	0.000189114	0.000251393	0.000502323	0.000213899	0.000292212	0.000107124	0.000254629	0.000121851	3.5481e-05	3.5153e-05	3.79861e-05	9.12276e-05	0.000339447	0.000341103	0.000233124	0.000281828	0.000160458	0.000184188	0.000128035	0.000200575	0.000318857	0.000265735	0.000227211	0.000199864	0.000158692	6.41412e-05	0.000135828	0.000116463	0.000121275	0.000188124	0.000100492	0.000120453	0.00026668	0.000276208	0.000319002	0.000347342	0.000256082	0.0001529	0.000218778	0.000161638
K00948	ribose-phosphate pyrophosphokinase [EC:2.7.6.1]	0.00107914	0.00112532	0.00110387	0.00129999	0.00127313	0.00118466	0.00125659	0.0011754	0.00109569	0.00119573	0.000899074	0.00118271	0.0011274	0.00146631	0.00122218	0.00132757	0.00126461	0.00142823	0.00151158	0.00121276	0.0010358	0.00121107	0.00112046	0.00117945	0.00142065	0.00123922	0.00141396	0.00121	0.00119399	0.00115504	0.00108501	0.00116577	0.00138614	0.00120326	0.0014587	0.00134945	0.0011662	0.00110405	0.0010448	0.0013114	0.00122778	0.00131586	0.00129313	0.00105954	0.000993113	0.00144385	0.00132478	0.001217
K00949	thiamine pyrophosphokinase [EC:2.7.6.2]	0.000672015	0.000665798	0.000637271	0.000690941	0.000659122	0.000653313	0.000734632	0.00066929	0.000679048	0.000660975	0.000600866	0.000636215	0.000662005	0.000793683	0.000751698	0.000787938	0.000843351	0.000836991	0.00089575	0.000781153	0.00069316	0.000720492	0.000705059	0.000649464	0.000823587	0.00072701	0.000749299	0.000765858	0.000660317	0.000707081	0.000677565	0.000676403	0.000744661	0.00077003	0.000817166	0.000792931	0.000793046	0.000705745	0.000733746	0.0008006	0.000725303	0.000746038	0.000733113	0.000606638	0.000636513	0.000784332	0.000674676	0.000658326
K00950	2-amino-4-hydroxy-6-hydroxymethyldihydropteridine diphosphokinase [EC:2.7.6.3]	0.000489967	0.000264186	0.000645304	0.000656978	0.000626837	0.000495805	0.000558033	0.000378753	0.00034487	0.000441545	0.000928711	0.000328168	0.000606362	0.000314188	0.000576098	0.000328801	0.000247298	0.000145054	0.000264266	0.000265904	0.000692715	0.000744587	0.000474079	0.000550549	0.000410091	0.000403277	0.000328323	0.000501064	0.000660712	0.000555708	0.000510587	0.00038778	0.000323437	0.00018439	0.00032622	0.000336088	0.000333216	0.000413633	0.000227969	0.000306633	0.000486118	0.000587202	0.000652149	0.000682103	0.000471378	0.000377494	0.000457536	0.00031335
K00951	GTP pyrophosphokinase [EC:2.7.6.5]	0.00101182	0.000872829	0.00107413	0.00116405	0.00109768	0.000927283	0.00107217	0.000949463	0.00091865	0.000900601	0.001092	0.000703217	0.00109385	0.000958871	0.00103522	0.000948105	0.000907294	0.000875591	0.000956359	0.000905316	0.00113419	0.00115731	0.00104024	0.000981618	0.00102292	0.000976866	0.00093392	0.00105225	0.00101176	0.00107644	0.000934934	0.000784603	0.000845214	0.000866759	0.000970223	0.000966973	0.000985927	0.000988099	0.00087029	0.000918972	0.00102735	0.00111343	0.00111611	0.00110636	0.00100249	0.000989568	0.000921354	0.00090161
K00952	nicotinamide-nucleotide adenylyltransferase [EC:2.7.7.1]	2.22095e-06	3.34476e-06	3.4635e-05	8.75133e-06	0	0	1.46202e-05	1.81542e-06	5.34449e-06	0	0	2.78191e-06	1.2492e-06	4.83609e-06	5.00263e-06	1.53012e-05	3.01526e-05	4.47871e-06	1.02071e-06	3.62513e-06	4.53025e-06	0	4.94366e-06	0	0	1.34861e-05	0	2.93781e-06	0	5.0173e-07	7.14853e-07	1.51754e-07	1.22877e-05	4.9821e-06	1.11416e-05	1.24265e-05	4.65645e-06	1.44743e-06	2.57978e-05	2.7216e-06	8.34077e-07	0	4.92302e-07	1.06694e-05	6.26966e-06	1.11869e-05	0	2.15759e-06
K00954	pantetheine-phosphate adenylyltransferase [EC:2.7.7.3]	0.000809247	0.000786159	0.000762828	0.000878878	0.000865382	0.00085503	0.000866263	0.000776676	0.000842321	0.000860906	0.000791983	0.000826947	0.000835831	0.000858347	0.000806523	0.000864144	0.000873162	0.000853826	0.000918795	0.000813365	0.000807732	0.000847705	0.000844877	0.000796801	0.000876031	0.00081873	0.000849018	0.000862097	0.000823038	0.00084389	0.000807746	0.000849886	0.000852458	0.000802855	0.000863156	0.000852439	0.000864196	0.000800036	0.000817029	0.000877668	0.00087343	0.00087667	0.000873732	0.000803316	0.000825665	0.000900934	0.000840624	0.000792041
K00955	bifunctional enzyme CysN/CysC [EC:2.7.7.4 2.7.1.25]	0	0	5.26018e-07	0	0	2.24179e-06	0	0	1.54274e-06	0	2.02549e-06	0	4.80463e-07	3.04369e-07	0	0	0	2.85477e-07	0	0	0	5.04288e-07	2.11185e-06	0	0	0	1.42753e-06	2.5651e-06	9.26472e-07	0	0	0	0	0	0	1.37477e-06	0	3.19433e-06	0	0	6.44514e-07	4.48867e-07	0	2.02071e-06	0	0	2.5242e-06	1.61295e-06
K00956	sulfate adenylyltransferase subunit 1 [EC:2.7.7.4]	0.000120169	2.32116e-05	0.00019032	0.00011503	0.000119959	7.38221e-05	0.000114664	7.96659e-05	2.62266e-05	4.89709e-05	0.000294625	2.86706e-05	0.000114672	4.02275e-05	0.000200608	4.32087e-05	1.86448e-05	1.76893e-05	1.54162e-05	6.52046e-05	0.00022258	0.000204885	8.78339e-05	0.00012503	0.000107582	9.09543e-05	2.88036e-05	9.87454e-05	0.000149213	0.000112252	8.83895e-05	2.61522e-05	4.61491e-05	5.30896e-05	8.71926e-05	4.97416e-05	4.78063e-05	0.000135565	2.27373e-05	3.11561e-05	0.000113833	0.000148628	0.000170583	0.00014103	6.49154e-05	3.24101e-05	5.69862e-05	1.87061e-05
K00957	sulfate adenylyltransferase subunit 2 [EC:2.7.7.4]	0.000158956	5.95532e-05	0.000220248	0.000127255	0.000167857	0.000182414	0.000133526	0.000114687	0.000127386	0.00015996	0.000400613	0.000212505	0.000142235	4.90315e-05	0.000235157	7.50495e-05	2.64185e-05	3.28286e-05	3.1114e-05	8.9924e-05	0.000229668	0.000221118	0.00010796	0.00017951	0.000117269	0.000122141	5.98297e-05	0.000110095	0.000222285	0.000126226	0.000148283	0.000154755	0.000137109	7.09751e-05	0.00010585	6.7328e-05	6.00579e-05	0.000154165	0.000170936	9.17428e-05	0.000172648	0.000169725	0.000208679	0.000168337	0.000111992	7.69516e-05	0.00012666	7.67376e-05
K00958	sulfate adenylyltransferase [EC:2.7.7.4]	0	1.4233e-07	0	0	0	2.69015e-07	1.10244e-06	6.18014e-07	8.30141e-07	5.38635e-06	1.08286e-06	1.76036e-06	2.40231e-07	0	0	0	1.98674e-07	7.24971e-07	0	9.70506e-07	0	0	7.1995e-07	0	0	8.42879e-08	2.8912e-07	0	3.60295e-07	0	2.29909e-05	1.51956e-05	2.29433e-06	0	0	0	4.55298e-07	0	0	0	0	0	0	0	0	0	0	0
K00960	DNA-directed RNA polymerase subunit 13 [EC:2.7.7.6]	0	0	0	0	0	0	0	0	0	0	0	0	0	0	0	0	1.98674e-07	7.24971e-07	0	2.85443e-07	0	0	7.1995e-07	0	0	0	2.8912e-07	0	3.60295e-07	0	0	0	0	0	0	0	4.55298e-07	0	0	0	0	0	0	0	0	0	0	0
K00962	polyribonucleotide nucleotidyltransferase [EC:2.7.7.8]	0.000734528	0.000778437	0.000711968	0.000555956	0.000569413	0.000667347	0.000567442	0.00071333	0.00065216	0.000672384	0.000738152	0.000721007	0.000663249	0.000478731	0.000553747	0.000525235	0.000584443	0.000386107	0.00039028	0.000623645	0.000683693	0.000539423	0.000702615	0.00065621	0.000442023	0.000630423	0.000523433	0.000631435	0.000588846	0.000647472	0.000729112	0.000651709	0.00045369	0.000665518	0.00040305	0.000530636	0.000655463	0.000698117	0.000723721	0.000549368	0.000604744	0.000503417	0.000493466	0.000744917	0.00081512	0.000470548	0.000539314	0.000676704
K00963	UTP--glucose-1-phosphate uridylyltransferase [EC:2.7.7.9]	0.000288118	0.000179855	0.000136661	0.000548795	0.000461501	0.000488576	0.000582047	0.00017419	0.000426544	0.000554468	0.000362127	0.000600442	0.000464035	0.00063293	0.000413441	0.000661126	0.00086817	0.000742454	0.0010587	0.000544511	0.000384026	0.000627565	0.000517696	0.000358101	0.000612797	0.000336268	0.000595099	0.000576998	0.000494873	0.000435975	0.000543954	0.000851109	0.000738845	0.000321971	0.000616909	0.000495222	0.00072086	0.000270229	0.000310935	0.000689	0.000779799	0.000577257	0.000764128	0.000371686	0.000251288	0.000796158	0.000548164	0.000258373
K00965	UDPglucose--hexose-1-phosphate uridylyltransferase [EC:2.7.7.12]	0.000398144	0.000578496	0.000352679	0.000511443	0.000488507	0.000448728	0.000619205	0.000500012	0.000538059	0.000448977	0.000158471	0.000467066	0.000386542	0.000661925	0.000491192	0.000691548	0.0006148	0.000774284	0.000754681	0.000569383	0.000384145	0.000418766	0.000475683	0.000471653	0.000677088	0.000598049	0.000695975	0.000548504	0.000476799	0.000565625	0.000409987	0.000484519	0.000632377	0.000623546	0.000699282	0.000670487	0.000517122	0.00049595	0.00059011	0.000654485	0.000469507	0.000516944	0.000546739	0.000343284	0.000449421	0.000705064	0.000542732	0.000596971
K00966	mannose-1-phosphate guanylyltransferase [EC:2.7.7.13]	2.78015e-05	3.0168e-05	2.57519e-06	9.44331e-06	4.42504e-05	0.000101015	9.81858e-06	9.41197e-06	5.52448e-05	0.000105782	9.88597e-05	0.000165227	1.37734e-05	2.20938e-06	1.22958e-05	1.76815e-05	7.13087e-07	7.12083e-06	0	0	7.05449e-06	1.40361e-05	1.83026e-05	4.81189e-05	6.83833e-06	1.39458e-05	1.92987e-05	4.5308e-06	6.47846e-05	9.36564e-06	4.9507e-05	0.000131031	8.15425e-05	3.03143e-07	1.44979e-05	0	0	0	2.34649e-05	3.73197e-05	5.48341e-05	1.79547e-05	3.87782e-05	2.29824e-05	3.97077e-05	2.76421e-05	6.62194e-05	2.38244e-05
K00968	choline-phosphate cytidylyltransferase [EC:2.7.7.15]	3.24417e-05	3.43134e-05	4.44913e-06	1.31664e-05	4.58687e-05	0.000105252	1.44695e-05	2.01886e-05	6.47767e-05	0.000117161	0.000110545	0.000172821	2.05239e-05	5.89563e-06	1.54728e-05	3.38353e-05	6.47463e-06	1.59332e-05	1.93582e-07	3.49668e-06	9.5453e-06	2.02677e-05	2.40622e-05	5.62324e-05	7.84646e-06	2.09379e-05	2.18647e-05	9.68293e-06	7.495e-05	2.04409e-05	5.54991e-05	0.000128729	7.79031e-05	2.14836e-06	2.3861e-05	1.11053e-05	4.98758e-06	5.45698e-06	3.02768e-05	3.95432e-05	5.77913e-05	1.97094e-05	4.39285e-05	3.19745e-05	4.24354e-05	3.3902e-05	7.036e-05	3.51569e-05
K00969	nicotinate-nucleotide adenylyltransferase [EC:2.7.7.18]	0.000817536	0.000791354	0.000769567	0.000879391	0.000867282	0.000864109	0.000870698	0.000791006	0.000851908	0.000862253	0.000796346	0.000831668	0.000849044	0.000868137	0.000821229	0.00092675	0.000875424	0.000903382	0.000963724	0.000829792	0.000845311	0.000849002	0.000861052	0.000803314	0.000900002	0.00085076	0.000862463	0.000880688	0.000820464	0.000845191	0.000815987	0.000863114	0.000863714	0.000854416	0.000891642	0.000894111	0.000920798	0.000825274	0.000831386	0.000910131	0.00087343	0.000883934	0.000874603	0.000801861	0.000826418	0.000901743	0.000840624	0.000817262
K00970	poly(A) polymerase [EC:2.7.7.19]	0.000261893	0.000147021	0.000318309	0.000308101	0.000326027	0.000279775	0.000246784	0.000191292	0.000188609	0.000253211	0.000497726	0.000212018	0.000291058	0.000105467	0.000253694	0.000120649	3.4503e-05	3.63774e-05	3.75638e-05	9.16058e-05	0.000340316	0.000338698	0.000240839	0.000285019	0.000161906	0.000184523	0.000136004	0.000207009	0.000322665	0.000253675	0.000226191	0.00019822	0.000164245	6.43587e-05	0.000136688	0.000115168	0.000121978	0.000187925	0.00010057	0.000108917	0.000264823	0.000277034	0.00031762	0.000349605	0.000256225	0.000148948	0.000221745	0.000167985
K00971	mannose-1-phosphate guanylyltransferase [EC:2.7.7.13]	0.000502906	0.000218204	0.000660041	0.000474419	0.000493122	0.000389085	0.000445868	0.000316613	0.000262746	0.000354385	0.000845099	0.000290345	0.000551878	0.000258835	0.000515839	0.000208878	0.000179153	8.28194e-05	0.000165891	0.000283923	0.00061061	0.000663064	0.000420539	0.000456032	0.000298388	0.000316932	0.000230925	0.000352409	0.000520673	0.000432607	0.000346098	0.000309674	0.000259383	0.000156844	0.000247237	0.000214366	0.000276297	0.000352999	0.000162402	0.000208294	0.000421838	0.00046919	0.000607283	0.000595324	0.00062874	0.000270918	0.000312727	0.000247543
K00972	UDP-N-acetylglucosamine/UDP-N-acetylgalactosamine diphosphorylase [EC:2.7.7.23 2.7.7.83]	0.000111999	0.000133684	4.57636e-05	4.91701e-05	1.77756e-05	7.06164e-05	7.65031e-05	3.63856e-05	1.86231e-05	6.30203e-05	1.54639e-05	1.20854e-05	1.05702e-05	3.55098e-05	3.51622e-05	2.20154e-05	3.55321e-05	2.06214e-06	1.0559e-06	1.41009e-05	2.83183e-05	1.09142e-05	7.82346e-05	2.84732e-05	5.70314e-05	6.82923e-05	2.85506e-05	1.92492e-05	6.27942e-06	6.05236e-05	0	1.36578e-05	1.18937e-05	6.91167e-05	1.41107e-05	4.95988e-05	2.40066e-06	9.53308e-05	0.00014905	4.68542e-05	8.30286e-06	1.31804e-05	4.54433e-05	0	0.000167897	5.46254e-05	6.53191e-06	1.05156e-05
K00973	glucose-1-phosphate thymidylyltransferase [EC:2.7.7.24]	0.000898333	0.000780403	0.000936973	0.000990783	0.000973628	0.000921734	0.00098266	0.000824978	0.000839737	0.00089392	0.00105775	0.000747031	0.000919744	0.000878232	0.00100407	0.0008992	0.000896606	0.000420761	0.000908597	0.000834973	0.000998312	0.00109527	0.00088445	0.000905496	0.000959002	0.000910338	0.000865995	0.00099125	0.000971711	0.00095349	0.000805214	0.000757107	0.000814464	0.000813716	0.000740194	0.00087623	0.00086459	0.000886865	0.000847355	0.000884267	0.000971596	0.000991978	0.00102379	0.000932727	0.000870183	0.000884451	0.000922306	0.000787988
K00974	tRNA nucleotidyltransferase (CCA-adding enzyme) [EC:2.7.7.72 3.1.3.- 3.1.4.-]	0.000550904	0.000642802	0.000455088	0.000575462	0.000550452	0.000584401	0.000640586	0.00059114	0.000660379	0.000608054	0.000297256	0.000619855	0.000555185	0.000755924	0.000572351	0.000747363	0.000835603	0.000819124	0.00088102	0.000759266	0.000474466	0.000516931	0.000611141	0.00051777	0.000722349	0.000639686	0.000722357	0.000660787	0.000503924	0.000592328	0.000582605	0.000672558	0.000760138	0.00074742	0.000732376	0.000745698	0.000742425	0.000617135	0.000726404	0.000774114	0.000610352	0.000613195	0.00057641	0.000459616	0.000614243	0.000751176	0.000639448	0.000655938
K00975	glucose-1-phosphate adenylyltransferase [EC:2.7.7.27]	0.000978466	0.00137719	0.000888149	0.00056104	0.000571644	0.000832937	0.000703972	0.00112117	0.0012561	0.000867225	0.000520325	0.0013902	0.000883461	0.000898893	0.000710996	0.000947318	0.00120841	0.00151065	0.000757699	0.00126021	0.000736677	0.000422413	0.000961517	0.00077206	0.000662934	0.00103159	0.000867703	0.000901162	0.000593405	0.000931183	0.00110245	0.000916448	0.000781747	0.00138268	0.000978182	0.00106077	0.00110945	0.00113821	0.0013562	0.000971494	0.000709579	0.000561892	0.000419138	0.000880995	0.00117593	0.00071708	0.000704295	0.00113567
K00978	glucose-1-phosphate cytidylyltransferase [EC:2.7.7.33]	0.000137619	0.000202495	0.000243678	2.49342e-05	2.75367e-05	3.60031e-05	4.35376e-05	0.000121111	5.84283e-05	4.06221e-05	2.20401e-05	2.15334e-05	2.79149e-05	0.000193861	6.59686e-05	2.85774e-05	5.45797e-05	9.52128e-06	3.78718e-05	9.00952e-05	7.53373e-05	8.28473e-06	5.40922e-05	0.000220083	1.5714e-05	7.58399e-05	0.000172821	1.87011e-05	5.90369e-05	8.04694e-05	3.46494e-05	3.41446e-05	6.71853e-05	4.99396e-05	1.35816e-05	2.2157e-05	1.27003e-05	6.58222e-05	9.85719e-05	3.86239e-05	2.02772e-05	2.28106e-05	6.66501e-06	2.00051e-05	4.56179e-05	7.52059e-05	0.000136683	8.26176e-05
K00979	3-deoxy-manno-octulosonate cytidylyltransferase (CMP-KDO synthetase) [EC:2.7.7.38]	0.000297537	0.000358071	0.000400434	0.000308914	0.000350494	0.000284236	0.000233133	0.00031923	0.000202705	0.000255388	0.000500862	0.000217229	0.00029238	0.000172631	0.00026991	0.000123952	4.12884e-05	3.75374e-05	5.74852e-05	0.000126137	0.000378113	0.00034393	0.000251698	0.000436159	0.000181725	0.000220394	0.000244695	0.000211975	0.000362401	0.000280825	0.000236672	0.000211447	0.00016901	7.82703e-05	0.000149704	0.000131424	0.000145944	0.000198207	0.000133008	0.000124651	0.000313028	0.00028439	0.000333544	0.000359567	0.000287247	0.000152447	0.000328758	0.000192116
K00980	glycerol-3-phosphate cytidylyltransferase [EC:2.7.7.39]	0.000100894	4.86948e-05	4.89526e-05	0.000319627	0.000297099	0.000176182	0.000284937	6.66779e-05	0.000193581	0.000201999	4.87209e-05	7.93005e-05	0.000135106	0.000241568	0.000151128	0.000202417	0.000157762	6.59965e-05	0.000381199	0.000149251	0.000122651	0.000236619	0.000187979	0.000154829	0.000323978	0.000161074	0.000253052	0.000192185	0.000188408	0.000165478	9.45057e-05	0.000196098	0.000295538	9.47521e-05	0.00020426	0.000165329	0.000176386	7.24631e-05	5.04265e-05	0.000214028	0.000282487	0.000317798	0.000370022	0.000107866	0.000183306	0.000322016	0.000210283	0.000127696
K00981	phosphatidate cytidylyltransferase [EC:2.7.7.41]	0.000809287	0.000786301	0.000762828	0.00087892	0.000865382	0.000856173	0.000866543	0.000778241	0.000842321	0.000861221	0.000794398	0.000831873	0.000836263	0.000858347	0.000806624	0.000862013	0.000873162	0.000852537	0.000918795	0.00081405	0.000810457	0.000849884	0.000847133	0.000796996	0.000877135	0.00081988	0.000849018	0.000862097	0.000814288	0.000846064	0.000809133	0.000849886	0.00085227	0.000802855	0.000862891	0.000852582	0.000864196	0.000800635	0.000817029	0.000877668	0.000873639	0.00087667	0.000876875	0.000795981	0.000826906	0.000900934	0.00084162	0.000792104
K00982	[glutamine synthetase] adenylyltransferase / [glutamine synthetase]-adenylyl-L-tyrosine phosphorylase [EC:2.7.7.42 2.7.7.89]	3.75776e-06	2.75765e-07	1.8575e-06	1.64756e-06	5.22735e-06	6.6357e-06	2.15165e-05	1.24568e-06	1.79068e-06	2.1321e-06	3.44724e-06	5.64364e-06	5.48736e-06	1.0822e-06	5.03138e-07	1.11143e-06	2.44522e-07	1.2244e-06	0	3.78212e-07	1.19893e-06	3.43096e-06	1.18432e-05	4.15977e-06	2.44032e-06	3.35236e-07	1.23599e-05	7.79396e-06	5.45589e-06	1.89022e-06	1.37714e-06	1.44166e-06	8.4044e-06	2.17472e-07	1.6536e-06	1.74078e-06	7.03642e-07	5.32388e-07	5.45573e-07	3.024e-07	1.06155e-06	4.36789e-06	9.278e-07	2.30846e-06	6.92105e-07	5.64105e-06	9.85323e-06	1.08298e-05
K00983	N-acylneuraminate cytidylyltransferase [EC:2.7.7.43]	7.81297e-05	1.39946e-06	6.62454e-05	2.19318e-05	0	2.6767e-05	2.36636e-05	1.00138e-05	1.91252e-05	1.9447e-05	1.2419e-05	1.56973e-06	4.90072e-06	2.69874e-05	2.17643e-05	6.30317e-06	1.98063e-05	1.9252e-06	7.98967e-06	9.10792e-06	2.57104e-05	5.04288e-07	2.61102e-05	2.13549e-05	2.01626e-06	3.38684e-05	2.54787e-05	1.21897e-05	8.80148e-06	2.00321e-05	0	1.56812e-06	3.19555e-06	1.02542e-05	0	1.64258e-06	0	2.18253e-05	1.24493e-05	1.40883e-05	1.28903e-06	4.89674e-06	2.53725e-06	0	6.83963e-06	4.04551e-05	1.27685e-05	8.00193e-06
K00984	streptomycin 3"-adenylyltransferase [EC:2.7.7.47]	0	1.48379e-05	2.49859e-06	8.55876e-07	0	8.02561e-06	1.6192e-06	1.74589e-05	8.50711e-06	6.32897e-06	9.61331e-06	2.03673e-05	1.02339e-05	2.02913e-06	8.97023e-06	2.37511e-06	5.92966e-06	3.02877e-06	1.90767e-05	3.5766e-05	1.63825e-06	1.44082e-06	0	5.53886e-06	4.51258e-06	8.12995e-06	2.20454e-06	2.14855e-06	8.49266e-06	0	3.95356e-05	2.02035e-05	7.66901e-06	8.8307e-06	5.82068e-06	1.03911e-05	1.24586e-05	8.68459e-06	0	2.77496e-06	2.00937e-06	4.03981e-06	0	5.17302e-06	4.3969e-06	0	3.23274e-06	6.82887e-06
K00986	RNA-directed DNA polymerase [EC:2.7.7.49]	0.000135279	4.43181e-05	0.000195646	0.000126156	0.000127075	9.50295e-05	0.000119201	0.000106086	5.63284e-05	7.84388e-05	0.00032739	4.23216e-05	0.000132007	4.75831e-05	0.000207092	5.24655e-05	5.94647e-05	2.49229e-05	1.49058e-05	6.60087e-05	0.000231511	0.000284598	0.000125895	0.000158052	0.000111998	0.000100092	4.29162e-05	0.000127356	0.000205857	0.00015182	0.000117467	4.53996e-05	6.15134e-05	3.68253e-05	9.46301e-05	6.4025e-05	7.649e-05	0.000103749	4.09336e-05	6.01064e-05	0.000130666	0.000150738	0.00024706	0.000208154	7.11444e-05	7.71182e-05	6.4367e-05	5.38768e-05
K00989	ribonuclease PH [EC:2.7.7.56]	0.000189465	0.000107871	3.53691e-05	7.21362e-05	0.000109637	0.000264554	0.000103575	9.95551e-05	0.000176855	0.000265263	0.000227615	0.000312315	0.000201861	6.40978e-05	7.54181e-05	0.00022462	0.000220171	0.000104552	0.000177304	0.00016515	0.000144629	0.000149717	0.000199934	0.000116365	7.3511e-05	9.7841e-05	0.00010683	0.000150336	0.000113373	6.26925e-05	0.000216331	0.000310327	0.000160859	0.000169635	8.47649e-05	0.000127255	0.000285223	0.000149634	0.000161931	0.000187701	0.000205196	0.000112198	0.000117376	0.000186685	0.000157345	9.86194e-05	0.000175911	0.000119198
K00990	[protein-PII] uridylyltransferase [EC:2.7.7.59]	3.75776e-06	2.75765e-07	1.8575e-06	1.64756e-06	5.22735e-06	6.6357e-06	2.15165e-05	1.24568e-06	1.79068e-06	2.1321e-06	3.44724e-06	5.64364e-06	5.48736e-06	1.0822e-06	5.03138e-07	1.11143e-06	2.44522e-07	1.2244e-06	0	3.78212e-07	1.19893e-06	3.43096e-06	1.18432e-05	4.15977e-06	2.44032e-06	3.35236e-07	1.23599e-05	7.79396e-06	5.45589e-06	1.89022e-06	1.37714e-06	1.44166e-06	8.4044e-06	2.17472e-07	1.6536e-06	1.74078e-06	7.03642e-07	5.32388e-07	5.45573e-07	3.024e-07	1.06155e-06	4.36789e-06	9.278e-07	2.30846e-06	6.92105e-07	5.64105e-06	9.85323e-06	1.08298e-05
K00991	2-C-methyl-D-erythritol 4-phosphate cytidylyltransferase [EC:2.7.7.60]	0.000897609	0.00111202	0.000900316	0.00066886	0.000642673	0.000729243	0.000664741	0.000942932	0.000864038	0.000801376	0.000761141	0.000746302	0.000713962	0.000646207	0.000631685	0.000577791	0.00070051	0.000405738	0.000473485	0.000765532	0.00078201	0.000602261	0.000810175	0.000861537	0.000509455	0.000715796	0.000689677	0.000716368	0.000681133	0.000802538	0.000784568	0.000676972	0.000501388	0.000811607	0.000497857	0.000609569	0.000771005	0.000829375	0.000863227	0.000689189	0.000762505	0.000533817	0.000597683	0.000841406	0.00111315	0.000566978	0.000676676	0.000762108
K00992	N-acetyl-alpha-D-muramate 1-phosphate uridylyltransferase [EC:2.7.7.99]	0	0	5.26018e-07	0	0	2.24179e-06	0	0	4.40783e-07	0	2.02549e-06	9.12103e-08	4.80463e-07	3.04369e-07	0	0	0	0	0	0	0	5.04288e-07	8.6394e-07	0	0	0	3.9754e-07	6.57718e-07	9.26472e-07	0	0	0	0	0	0	0	0	0	0	0	6.44514e-07	0	0	0	0	0	2.5242e-06	0
K00995	CDP-diacylglycerol---glycerol-3-phosphate 3-phosphatidyltransferase [EC:2.7.8.5]	0.000703177	0.000699865	0.000645649	0.000707339	0.00071104	0.000749464	0.000773568	0.000670697	0.000744336	0.00077174	0.000689611	0.000798406	0.000672978	0.000794235	0.0007628	0.000805299	0.000853891	0.000844981	0.000896559	0.000784523	0.000704372	0.000730557	0.000727165	0.00070263	0.000829729	0.000744547	0.000783939	0.000776889	0.000720752	0.000724097	0.000724896	0.000804853	0.000831763	0.000770037	0.000830921	0.000788191	0.000788245	0.000702273	0.000764813	0.000833206	0.000782109	0.000779052	0.000765851	0.000638557	0.000674877	0.000817107	0.000745162	0.000688917
K00996	undecaprenyl-phosphate galactose phosphotransferase [EC:2.7.8.6]	8.32855e-07	3.66501e-06	7.00262e-06	5.5204e-06	9.96665e-06	9.7742e-06	2.34759e-05	8.88395e-07	1.68967e-06	3.50113e-06	3.1551e-06	2.82752e-06	4.16609e-06	3.92298e-06	2.58757e-07	3.86716e-06	2.17013e-06	1.80437e-06	1.54866e-06	9.13418e-07	7.04981e-06	0	7.43948e-06	1.79096e-05	3.96851e-06	3.71633e-06	2.27682e-06	5.70022e-06	1.17868e-05	4.1573e-06	2.60711e-06	3.94559e-06	5.40283e-06	3.69044e-06	2.38119e-06	3.07091e-06	8.19536e-06	2.42902e-06	9.04092e-07	2.73049e-06	2.84345e-06	5.72469e-06	2.04116e-05	1.35032e-05	6.79892e-06	1.95176e-06	1.53223e-05	1.42443e-06
K00997	holo-[acyl-carrier protein] synthase [EC:2.7.8.7]	0.000229194	0.000271703	0.000267754	0.000394138	0.000432706	0.000356187	0.000439521	0.000244528	0.000346948	0.000371242	0.000241153	0.000456478	0.000367188	0.00057647	0.000355187	0.000425906	0.000561524	0.000625541	0.000706937	0.000393241	0.000250054	0.000412	0.000336268	0.000447009	0.000489421	0.000325684	0.000583688	0.000422522	0.000468392	0.0003762	0.000282118	0.000571532	0.000615131	0.000241796	0.000517935	0.000403961	0.000424599	0.000192101	0.000348271	0.000498785	0.000381631	0.000485666	0.00049607	0.000228393	0.000256235	0.000579152	0.000540658	0.000305243
K00998	CDP-diacylglycerol---serine O-phosphatidyltransferase [EC:2.7.8.8]	8.32855e-07	0	0	0	2.4146e-06	1.7486e-06	9.21568e-08	8.88395e-07	4.77515e-07	3.14204e-07	6.23229e-07	4.92535e-06	4.59851e-06	4.05826e-07	0	5.78552e-07	0	0	0	0	3.29655e-07	0	2.15985e-06	1.67897e-07	9.92128e-07	0	0	0	7.20589e-07	6.91273e-08	1.05125e-06	0	0	0	4.70358e-07	5.71333e-07	0	3.32743e-07	0	1.33412e-07	0	3.1131e-06	0	4.5264e-08	0	0	3.40988e-06	1.04737e-06
K01000	phospho-N-acetylmuramoyl-pentapeptide-transferase [EC:2.7.8.13]	0.000815355	0.00078913	0.000763617	0.000879969	0.000867976	0.000858504	0.000888441	0.000776676	0.000845002	0.00086241	0.000794943	0.000828794	0.000840756	0.000858736	0.00080924	0.000868164	0.000874538	0.000854664	0.000919516	0.00081522	0.000811376	0.000854405	0.000854164	0.00079929	0.000883696	0.000819094	0.000849018	0.000868718	0.000825714	0.000851676	0.000807746	0.000853705	0.000852702	0.000803567	0.00086977	0.000856295	0.000867115	0.000801616	0.000830575	0.0008787	0.000882264	0.00087667	0.000874603	0.000809156	0.000827578	0.000900934	0.000843857	0.000808192
K01002	phosphoglycerol transferase [EC:2.7.8.20]	8.01127e-06	5.21107e-05	3.94349e-05	2.80513e-05	4.10482e-05	3.70792e-05	6.39775e-05	3.01861e-05	8.09938e-06	2.27125e-05	1.50744e-05	0.000166208	3.74141e-05	1.45421e-05	2.221e-05	3.25207e-05	3.62045e-05	2.31024e-05	9.08077e-06	5.90867e-05	1.83002e-05	0	2.47663e-05	2.21503e-05	1.47859e-05	5.16455e-05	3.8724e-05	2.95535e-05	4.64265e-05	1.4768e-05	5.30673e-05	1.52765e-05	4.24347e-05	4.76199e-05	2.08427e-05	4.87775e-05	1.40314e-05	3.4023e-05	3.42308e-05	1.2176e-05	1.29851e-05	2.55157e-05	4.13155e-05	8.77442e-05	2.0295e-05	1.50666e-05	2.46663e-05	3.71189e-05
K01006	pyruvate, orthophosphate dikinase [EC:2.7.9.1]	0.000733011	0.000775884	0.00071141	0.000555057	0.000563261	0.000658559	0.000543816	0.000711698	0.000650424	0.000663878	0.000730381	0.000689779	0.000654206	0.000475991	0.000552323	0.00052394	0.000581799	0.00038355	0.000385986	0.000617415	0.000682361	0.000538694	0.000688948	0.000652894	0.000439166	0.000629705	0.000512067	0.000623597	0.000582258	0.000644727	0.000670975	0.000611621	0.000432604	0.000664009	0.000400309	0.000528895	0.000654139	0.000697584	0.000722084	0.000548426	0.000602128	0.000500803	0.000491403	0.00073784	0.000818357	0.000465097	0.000531255	0.000666713
K01007	pyruvate, water dikinase [EC:2.7.9.2]	6.38522e-06	4.99331e-06	1.22299e-05	5.77288e-05	2.71257e-05	4.46564e-05	0.000106654	6.60502e-06	3.11733e-05	3.02982e-05	1.38213e-05	2.43837e-05	4.21226e-05	9.81422e-05	7.25094e-05	0.00010688	0.000123132	2.55583e-05	0.000135684	4.46812e-05	1.28004e-05	8.82864e-05	2.23184e-05	3.50022e-05	9.43162e-05	4.54388e-05	7.99778e-05	8.88358e-05	8.10148e-05	6.3696e-05	2.88044e-05	4.1884e-05	8.61515e-05	4.38372e-05	7.27291e-05	9.8412e-05	4.52814e-05	4.54251e-05	6.98748e-05	0.000104123	1.88805e-05	5.31414e-05	6.46809e-05	2.51021e-05	5.29257e-07	0.000100864	9.53141e-05	2.02771e-05
K01008	selenide, water dikinase [EC:2.7.9.3]	0.000265611	0.000356837	0.000268253	7.2835e-05	0.000127152	0.000232171	0.000140179	0.000364628	0.000220193	0.000199452	0.000151402	0.0003788	0.00016243	0.000197384	0.00019447	0.000209535	0.000266682	0.000243945	0.000150229	0.000279967	0.000190976	0.000117805	0.000240655	0.000234747	0.000156564	0.000279462	0.000267662	0.000187077	0.000146408	0.000171457	0.000270688	0.000253643	0.000210404	0.00039808	0.000130135	0.00024786	0.000292115	0.000321308	0.000490467	0.000177277	0.000168777	8.12874e-05	5.52325e-05	0.000209553	0.000114136	0.000153756	0.000219812	0.000388858
K01011	thiosulfate/3-mercaptopyruvate sulfurtransferase [EC:2.8.1.1 2.8.1.2]	8.80447e-06	8.27295e-06	1.19176e-05	9.28625e-06	1.80581e-05	1.7598e-05	3.03937e-05	1.85404e-05	2.31841e-05	2.15903e-05	4.27107e-05	7.24894e-05	2.71663e-05	1.04838e-05	2.20662e-05	1.0216e-05	0.000117753	0.0001284	8.51763e-05	9.09279e-05	2.63698e-05	9.94167e-06	5.88439e-05	1.96785e-05	6.35282e-06	9.44407e-06	6.89731e-05	2.17485e-05	7.75663e-05	4.54055e-05	3.47881e-05	0.000120846	8.63766e-05	3.60872e-05	8.21656e-06	1.85147e-05	9.85927e-05	1.66871e-05	1.07868e-05	5.2831e-05	1.41035e-05	3.04446e-05	5.85082e-06	6.23349e-06	2.73585e-05	4.12725e-05	1.97065e-05	4.03867e-05
K01012	biotin synthase [EC:2.8.1.6]	0.000812341	0.00114684	0.000845314	0.000587987	0.000665239	0.00078559	0.000638429	0.000984483	0.000855571	0.000738275	0.000772245	0.00095778	0.000736784	0.000592886	0.00070152	0.000627064	0.000561672	0.000497664	0.000440902	0.000776938	0.000726497	0.000545628	0.0007464	0.000801183	0.000565119	0.000826213	0.00070201	0.000591522	0.0006686	0.000756886	0.000755195	0.000712672	0.000534349	0.000924423	0.000477852	0.000726735	0.000691445	0.000889624	0.00102584	0.000647642	0.000644789	0.000525778	0.000510489	0.000839183	0.000836107	0.000538895	0.00068126	0.000929006
K01026	propionate CoA-transferase [EC:2.8.3.1]	0.000271471	0.000114576	6.99604e-05	0.00013878	5.30698e-05	0.000219785	0.000163692	0.000106414	0.000213853	0.000305406	0.000213417	0.000198565	0.000150659	0.000183366	0.000145968	0.000228345	0.000343859	0.000118476	0.000347181	0.000215138	0.000245766	0.000224408	0.000305931	0.000114758	0.000179863	0.00011965	0.000152547	0.000250678	5.39927e-05	6.12431e-05	0.000351413	0.000318834	0.00027183	0.00021887	0.000116237	0.000145547	0.000391184	0.000195087	0.000139105	0.000222922	0.00046841	5.93031e-05	0.00017276	0.000139914	8.32969e-05	0.000167613	0.000152293	0.000123464
K01027	3-oxoacid CoA-transferase [EC:2.8.3.5]	0	0	0	0	0	0	0	0	0	0	0	0	0	0	0	0	0	0	0	0	0	0	0	0	0	0	0	0	0	0	0	0	0	0	0	0	0	0	0	0	0	0	0	0	2.44272e-06	0	0	0
K01028	3-oxoacid CoA-transferase subunit A [EC:2.8.3.5]	8.32855e-07	0	0	0	2.4146e-06	2.01761e-06	1.19459e-06	1.50641e-06	1.30766e-06	5.38635e-06	1.08286e-06	1.76036e-06	4.40632e-06	4.05826e-07	0	5.78552e-07	0	0	0	2.56899e-07	3.29655e-07	0	2.15985e-06	1.67897e-07	9.92128e-07	8.42879e-08	0	0	5.35295e-06	6.91273e-08	2.24107e-05	1.51956e-05	2.29433e-06	0	4.70358e-07	5.71333e-07	0	3.32743e-07	0	1.33412e-07	0	3.72519e-06	0	4.57166e-06	2.44272e-06	0	3.40988e-06	3.3097e-06
K01029	3-oxoacid CoA-transferase subunit B [EC:2.8.3.5]	2.59771e-05	2.23459e-05	1.00601e-05	0	2.4146e-06	1.17918e-05	1.03241e-05	1.23217e-05	1.08579e-05	5.38635e-06	5.05595e-06	1.76036e-06	1.33429e-05	3.11133e-06	1.55254e-06	1.30022e-05	1.36932e-05	0	6.19464e-06	3.45386e-06	1.39953e-06	0	1.19512e-05	6.65875e-06	9.92128e-07	8.42879e-08	2.74664e-06	1.57852e-06	5.76471e-06	8.39414e-06	2.24107e-05	2.57172e-05	5.59605e-06	0	4.35081e-06	5.71333e-07	3.47682e-06	3.32743e-07	1.96406e-05	1.32967e-05	7.96165e-06	3.1131e-06	0	4.5264e-08	1.04223e-05	4.09393e-06	3.40988e-06	1.16049e-05
K01031	3-oxoadipate CoA-transferase, alpha subunit [EC:2.8.3.6]	8.32855e-07	0	0	0	2.4146e-06	1.7486e-06	9.21568e-08	8.88395e-07	4.77515e-07	3.14204e-07	0	9.12103e-08	4.16609e-06	4.05826e-07	0	5.78552e-07	0	0	0	0	3.29655e-07	0	2.15985e-06	1.67897e-07	9.92128e-07	0	0	0	7.20589e-07	6.91273e-08	1.05125e-06	0	0	0	4.70358e-07	5.71333e-07	0	3.32743e-07	0	1.33412e-07	0	3.1131e-06	0	4.5264e-08	0	0	3.40988e-06	1.04737e-06
K01032	3-oxoadipate CoA-transferase, beta subunit [EC:2.8.3.6]	8.32855e-07	0	0	0	2.4146e-06	1.7486e-06	9.21568e-08	8.88395e-07	4.77515e-07	3.14204e-07	0	9.12103e-08	4.16609e-06	4.05826e-07	0	5.78552e-07	0	0	0	0	3.29655e-07	0	2.15985e-06	1.67897e-07	9.92128e-07	0	0	0	7.20589e-07	6.91273e-08	1.05125e-06	0	0	0	4.70358e-07	5.71333e-07	0	3.32743e-07	0	1.33412e-07	0	3.1131e-06	0	4.5264e-08	0	0	3.40988e-06	1.04737e-06
K01034	acetate CoA/acetoacetate CoA-transferase alpha subunit [EC:2.8.3.8 2.8.3.9]	0.000237274	8.91728e-05	2.12051e-05	5.56319e-06	3.30338e-05	0.000176283	3.56139e-05	6.9797e-05	0.000168223	0.000258927	0.000206993	0.000174094	6.08506e-05	1.12786e-05	5.02419e-05	2.1003e-05	0.000289804	0.000105685	6.78506e-05	0.000130971	0.00012505	0.000121786	0.000241495	1.772e-05	5.04385e-05	4.56974e-05	5.87365e-05	0.000181771	4.05846e-05	3.38018e-05	0.000280317	0.000250785	0.000147283	0.000149015	1.78368e-05	5.2518e-05	0.000290418	0.000140939	3.75847e-05	0.000110545	0.000215012	1.89851e-05	5.79402e-06	8.71938e-05	3.52567e-05	6.74584e-05	9.71298e-05	6.06324e-05
K01035	acetate CoA/acetoacetate CoA-transferase beta subunit [EC:2.8.3.8 2.8.3.9]	0.000249847	0.000100346	2.62352e-05	5.56319e-06	3.30338e-05	0.00018117	4.01786e-05	7.52046e-05	0.000172998	0.000258927	0.00020898	0.000174094	6.53189e-05	1.26313e-05	5.10182e-05	2.72148e-05	0.000296651	0.000105685	7.0948e-05	0.000132569	0.000125585	0.000121786	0.000246391	2.09655e-05	5.04385e-05	4.56974e-05	6.01098e-05	0.000182561	4.31067e-05	3.79643e-05	0.000280317	0.000256046	0.000148934	0.000149015	1.97771e-05	5.2518e-05	0.000292156	0.000140939	4.7405e-05	0.000117127	0.000218993	1.89851e-05	5.79402e-06	8.71938e-05	3.92464e-05	6.95054e-05	9.71298e-05	6.59112e-05
K01039	glutaconate CoA-transferase, subunit A [EC:2.8.3.12]	3.85493e-05	0.000181768	8.83382e-05	6.50466e-06	2.3324e-05	6.54603e-06	1.60413e-05	0.000103015	2.01537e-05	3.77045e-06	2.5642e-06	5.68559e-06	1.72967e-06	5.98255e-05	1.65317e-05	4.93292e-06	9.16957e-06	2.80322e-06	2.63976e-06	9.80011e-06	3.70779e-05	3.38593e-06	1.83347e-05	0.00015353	6.49684e-06	2.58994e-05	0.000122009	2.85011e-06	4.10736e-05	2.03294e-05	9.41924e-06	9.61106e-06	9.87404e-06	1.02014e-05	2.11661e-06	0	9.93377e-07	5.42936e-06	2.05862e-05	3.48649e-06	1.11842e-05	8.89574e-06	0	1.11543e-05	3.82694e-06	1.22261e-05	0.000109706	3.61134e-05
K01040	glutaconate CoA-transferase, subunit B [EC:2.8.3.12]	3.85493e-05	0.000181768	8.83382e-05	6.50466e-06	2.3324e-05	6.54603e-06	1.60413e-05	0.000103015	2.01537e-05	3.77045e-06	2.5642e-06	5.68559e-06	1.72967e-06	5.98255e-05	1.65317e-05	4.93292e-06	9.16957e-06	2.80322e-06	2.63976e-06	9.80011e-06	3.70779e-05	3.38593e-06	1.83347e-05	0.00015353	6.49684e-06	2.58994e-05	0.000122009	2.85011e-06	4.10736e-05	2.03294e-05	9.41924e-06	9.61106e-06	9.87404e-06	1.02014e-05	2.11661e-06	0	9.93377e-07	5.42936e-06	2.05862e-05	3.48649e-06	1.11842e-05	8.89574e-06	0	1.11543e-05	3.82694e-06	1.22261e-05	0.000109706	3.61134e-05
K01042	L-seryl-tRNA(Ser) seleniumtransferase [EC:2.9.1.1]	4.72447e-05	0.000198625	0.000132409	2.81797e-05	4.84204e-05	1.79007e-05	3.40756e-05	0.000120155	3.01293e-05	2.8303e-05	3.48066e-05	0.0002001	4.42708e-05	7.73267e-05	4.17317e-05	3.70684e-05	0.00010195	7.69839e-05	4.59582e-05	9.95791e-05	5.10187e-05	1.0464e-05	4.87646e-05	0.000165052	1.22896e-05	4.22301e-05	0.000150062	1.54125e-05	9.22097e-05	4.34543e-05	6.98138e-05	7.594e-05	8.1155e-05	3.83674e-05	1.6514e-05	4.51371e-05	5.47392e-05	2.73821e-05	6.13561e-05	3.61368e-05	1.13643e-05	2.67823e-05	2.17749e-06	2.4137e-05	3.41371e-05	4.37041e-05	0.000123324	6.15331e-05
K01046	triacylglycerol lipase [EC:3.1.1.3]	6.22262e-05	0.000187289	9.48477e-05	9.73559e-06	2.46854e-05	7.0168e-06	3.17209e-05	0.000112131	2.0053e-05	1.24559e-05	1.29242e-05	1.65136e-05	1.5591e-05	8.98735e-05	2.86021e-05	2.70397e-05	2.05704e-05	6.60529e-06	7.93688e-06	3.21409e-05	4.42995e-05	1.26072e-05	3.71734e-05	0.000200373	1.65621e-05	3.76115e-05	0.000134621	8.94497e-06	6.04266e-05	4.4877e-05	3.87808e-05	4.7207e-05	6.16755e-05	1.6317e-05	9.61294e-06	8.46286e-06	4.54594e-06	1.82842e-05	8.94066e-05	2.64806e-05	1.8653e-05	1.42821e-05	3.02955e-06	1.48927e-05	2.69921e-05	2.06443e-05	0.000119877	6.91056e-05
K01048	lysophospholipase [EC:3.1.1.5]	3.49105e-05	0.000137014	3.8613e-05	2.96488e-05	1.22657e-05	5.51032e-05	9.85578e-05	3.09297e-05	2.60583e-05	5.51877e-05	9.6729e-06	2.43495e-05	1.56732e-05	3.76968e-05	3.38109e-05	3.95395e-05	5.02596e-05	1.52244e-05	8.55282e-06	2.54495e-05	3.4237e-05	3.1455e-05	6.31036e-05	1.33119e-05	5.57912e-05	6.00264e-05	2.90204e-05	3.52427e-05	2.61471e-05	5.86727e-05	1.52537e-05	3.15395e-05	4.03775e-05	6.8662e-05	2.23787e-05	5.9374e-05	1.48042e-05	8.84986e-05	0.000203977	5.15976e-05	7.85435e-06	5.22482e-06	5.63686e-05	3.45186e-05	1.07073e-05	6.21149e-05	2.01342e-05	3.33697e-05
K01051	pectinesterase [EC:3.1.1.11]	0.000362054	7.20309e-05	0.00057096	0.000345046	0.000356488	0.000200954	0.00028931	0.000228009	7.62187e-05	0.000145925	0.00087972	4.03455e-05	0.000333523	0.000118484	0.000588096	0.000142141	5.87158e-05	5.32245e-05	4.79028e-05	0.000178183	0.000664355	0.000611935	0.000256638	0.000383691	0.000319657	0.000266081	8.2363e-05	0.000296236	0.000452015	0.000336935	0.000266977	6.76821e-05	0.000144338	9.46994e-05	0.00025905	0.000148439	0.000138452	0.000276482	9.13548e-05	0.00010085	0.000344133	0.000439535	0.000509173	0.000423304	0.000196721	8.45839e-05	0.000148012	5.73122e-05
K01053	gluconolactonase [EC:3.1.1.17]	0	0	0	0	0	0	9.21568e-08	0	0	0	0	0	1.78252e-07	0	0	0	0	0	0	0	3.29655e-07	0	0	0	0	0	0	0	0	6.91273e-08	0	0	0	0	0	0	0	0	0	0	0	1.75058e-07	0	0	0	0	0	0
K01055	3-oxoadipate enol-lactonase [EC:3.1.1.24]	8.32855e-07	0	0	0	2.4146e-06	1.7486e-06	9.21568e-08	8.88395e-07	4.77515e-07	3.14204e-07	0	9.12103e-08	4.16609e-06	4.05826e-07	0	5.78552e-07	0	0	0	0	3.29655e-07	0	2.15985e-06	1.67897e-07	9.92128e-07	0	0	0	7.20589e-07	6.91273e-08	1.05125e-06	0	0	0	4.70358e-07	5.71333e-07	0	3.32743e-07	0	1.33412e-07	0	3.1131e-06	0	4.5264e-08	0	0	3.40988e-06	1.04737e-06
K01056	peptidyl-tRNA hydrolase, PTH1 family [EC:3.1.1.29]	0.000809247	0.000786159	0.000762828	0.000878878	0.000865382	0.00085503	0.000866263	0.000776676	0.000842321	0.000860906	0.000791983	0.000826947	0.000835831	0.000858347	0.000806523	0.000864144	0.000873162	0.000853826	0.000918795	0.000813365	0.000808835	0.000847705	0.000844877	0.000796801	0.000876639	0.000823864	0.000849018	0.000862097	0.000828545	0.00084389	0.000807746	0.000849886	0.000852458	0.000802855	0.000863156	0.000852439	0.000864196	0.000800036	0.000817029	0.000877668	0.00087343	0.00087667	0.000873732	0.000803316	0.000825665	0.000900934	0.000842794	0.000795099
K01057	6-phosphogluconolactonase [EC:3.1.1.31]	0.000220548	0.000115163	0.000314436	0.00029808	0.000276741	0.00017477	0.00023584	0.000180644	0.00013184	0.000147115	0.00039353	4.08622e-05	0.000272206	0.000101397	0.000239961	0.000100653	3.31174e-05	2.92566e-05	3.75638e-05	9.16058e-05	0.000332932	0.000319007	0.000219513	0.000235932	0.000154076	0.000170578	0.000115025	0.000201821	0.000256234	0.000230489	0.000175381	6.41032e-05	8.12394e-05	6.43587e-05	0.00012144	0.000112776	0.000121978	0.000187193	7.68244e-05	6.39576e-05	0.000207145	0.000255681	0.000276759	0.000326578	0.00021556	0.000112643	0.00014864	0.000141605
K01058	phospholipase A1/A2 [EC:3.1.1.32 3.1.1.4]	0.000101836	9.18298e-05	0.000123557	0.000179199	0.000161008	0.00010709	0.000120822	0.000104946	0.00010891	9.71339e-05	9.97751e-05	3.18894e-05	0.000167235	6.46869e-05	4.33921e-05	5.78552e-05	1.47172e-05	1.03429e-05	2.32387e-05	3.2512e-05	0.000108872	0.000114005	0.000127275	0.000108046	4.70301e-05	8.09355e-05	7.75293e-05	9.59392e-05	0.000104653	0.000114399	8.8768e-05	4.15678e-05	2.66858e-05	3.38005e-05	3.42406e-05	6.30073e-05	7.51241e-05	9.80177e-05	5.37077e-05	3.48205e-05	9.30091e-05	0.000112351	0.000105362	0.000183374	0.00015038	8.06765e-05	0.000101145	0.000116049
K01060	cephalosporin-C deacetylase [EC:3.1.1.41]	6.54386e-06	5.67542e-06	2.83721e-05	0.000118154	3.28797e-05	2.58703e-05	0.000114852	6.41189e-06	2.96426e-05	3.68068e-05	3.06551e-05	7.0916e-05	8.91258e-05	0.00020413	0.000100685	0.000164035	0.000111319	0.000398891	0.000271438	6.96481e-05	9.32129e-05	0.00010183	5.7644e-05	9.02229e-05	0.000135282	3.96919e-05	8.78382e-05	5.46125e-05	6.46472e-05	3.54928e-05	3.63734e-05	7.41063e-05	0.000148203	3.66276e-05	0.000260681	0.000103108	8.96523e-05	3.25755e-05	1.28755e-05	0.00011758	0.000233011	6.26374e-05	0.000191354	4.68401e-05	1.05851e-05	0.000124674	6.83305e-05	8.81888e-06
K01061	carboxymethylenebutenolidase [EC:3.1.1.45]	1.66571e-06	0	5.26018e-07	0	4.8292e-06	5.73898e-06	3.84475e-06	1.77679e-06	1.39581e-06	6.28408e-07	2.02549e-06	0	8.81265e-06	1.11602e-06	0	1.1571e-06	0	0	0	0	6.59311e-07	5.04288e-07	6.19157e-06	3.35794e-07	1.98426e-06	0	2.92734e-06	9.20805e-07	2.36765e-06	1.38255e-07	2.10251e-06	0	1.38823e-06	0	9.40715e-07	1.14267e-06	0	6.65486e-07	0	2.66823e-07	6.44514e-07	6.2262e-06	1.13608e-07	9.05279e-08	1.22136e-07	6.18849e-07	9.34396e-06	4.02191e-06
K01066	acetyl esterase [EC:3.1.1.-]	8.32855e-07	1.4233e-06	4.2739e-07	0	2.4146e-06	4.43874e-06	2.91284e-06	8.88395e-07	7.92197e-06	3.14204e-07	0	9.12103e-08	4.16609e-06	4.05826e-07	0	5.78552e-07	1.98674e-07	7.24971e-07	0	5.42342e-07	3.29655e-07	0	2.8798e-06	4.66822e-06	9.92128e-07	0	2.8912e-07	0	1.97647e-05	6.91273e-08	1.05125e-06	0	1.24453e-06	0	4.70358e-07	5.71333e-07	4.55298e-07	3.32743e-07	0	1.33412e-07	0	3.1131e-06	0	4.57166e-06	0	0	7.30689e-06	3.89623e-06
K01067	acetyl-CoA hydrolase [EC:3.1.2.1]	2.71669e-06	0	7.72589e-07	2.35366e-07	2.2091e-06	0	4.30639e-07	0	4.59149e-07	0	0	0	0	0	0	0	0	0	0	0	0	2.6295e-06	0	8.00539e-07	0	0	2.3491e-07	0	0	5.20313e-07	0	0	0	0	0	0	0	0	0	0	4.17039e-07	2.85643e-07	0	0	4.27477e-07	1.90415e-07	5.09268e-07	8.37898e-07
K01069	hydroxyacylglutathione hydrolase [EC:3.1.2.6]	8.32855e-07	0	5.26018e-07	0	2.4146e-06	3.99039e-06	2.24535e-06	8.88395e-07	1.50601e-06	4.66817e-06	8.10198e-06	2.67246e-05	7.2891e-06	2.13059e-06	0	5.78552e-07	0	0	0	0	3.29655e-07	6.84391e-07	3.11978e-06	1.67897e-07	9.92128e-07	0	3.9754e-07	6.57718e-07	1.64706e-06	6.91273e-08	5.06705e-05	3.19188e-05	3.78948e-06	0	4.70358e-07	5.71333e-07	0	3.32743e-07	0	1.33412e-07	7.20339e-07	3.15391e-06	1.13608e-07	4.5264e-08	0	0	5.93408e-06	1.04737e-06
K01070	S-formylglutathione hydrolase [EC:3.1.2.12]	8.32855e-07	0	5.26018e-07	0	2.4146e-06	3.99039e-06	2.24535e-06	8.88395e-07	1.50601e-06	4.66817e-06	8.10198e-06	2.66334e-05	7.2891e-06	2.13059e-06	0	5.78552e-07	0	0	0	0	3.29655e-07	5.04288e-07	3.02379e-06	1.67897e-07	9.92128e-07	0	3.9754e-07	6.57718e-07	1.64706e-06	6.91273e-08	5.05864e-05	3.19188e-05	3.78948e-06	0	4.70358e-07	5.71333e-07	0	3.32743e-07	0	1.33412e-07	6.44514e-07	3.1131e-06	0	4.5264e-08	0	0	5.93408e-06	1.04737e-06
K01071	medium-chain acyl-[acyl-carrier-protein] hydrolase [EC:3.1.2.21]	7.4719e-05	7.72142e-06	5.08594e-05	0.000322922	0.000300541	0.000187683	0.000308122	6.33464e-05	0.000194581	0.000193496	5.96352e-05	0.000128515	0.000175705	0.000381679	0.000253534	0.000340176	0.000290737	0.000467719	0.00053024	0.000190947	0.000124039	0.000308282	0.000142262	0.000140592	0.000434008	0.000188307	0.000325585	0.000231363	0.000236868	0.000197533	0.000129809	0.000234919	0.000405847	0.000138629	0.000460958	0.000322367	0.000209451	0.000101919	0.00010102	0.000334181	0.00027062	0.000373254	0.000381174	6.35312e-05	1.46156e-05	0.000432608	0.000301797	0.000115839
K01073	acyl-CoA hydrolase [EC:3.1.2.20]	2.30027e-06	0	2.86022e-06	4.27938e-06	1.64398e-05	8.56364e-06	1.03353e-05	5.25312e-06	7.34638e-07	0	1.40227e-05	2.93697e-05	2.1813e-05	4.66023e-05	2.49844e-05	4.29347e-05	1.29138e-05	0.000386442	5.03314e-06	1.25595e-06	1.72183e-05	8.64493e-06	5.90359e-06	1.27654e-05	4.40377e-05	2.00758e-05	5.67398e-06	4.1217e-06	1.87353e-05	6.76407e-06	2.22866e-06	2.32689e-06	5.49663e-05	2.12991e-05	0.000202901	6.3775e-05	6.82947e-06	1.6138e-05	2.08876e-06	2.05988e-05	0	3.43996e-05	3.64682e-05	0	7.28746e-06	1.13773e-05	2.26292e-05	3.47728e-06
K01077	alkaline phosphatase [EC:3.1.3.1]	0.000635855	0.000232927	0.000901089	0.000659246	0.000701535	0.000498641	0.000556353	0.000445266	0.00027845	0.000412221	0.00139655	0.000322011	0.000645039	0.000270942	0.000872037	0.000304978	0.00012166	0.000475758	9.02182e-05	0.000277422	0.00102659	0.000984196	0.000507664	0.000684001	0.000529002	0.000480927	0.000215476	0.000514789	0.000808754	0.000600966	0.000562761	0.000323108	0.000359015	0.000184212	0.00059869	0.000326749	0.000283444	0.000480106	0.000180769	0.000230562	0.000610187	0.000749212	0.000908894	0.000804084	0.000469414	0.000254129	0.000390291	0.000227057
K01079	phosphoserine phosphatase [EC:3.1.3.3]	0.000221857	0.000117298	0.000314962	0.000295641	0.000282547	0.000183154	0.000236319	0.000181918	0.000133015	0.000147788	0.000397075	4.9436e-05	0.000279111	0.000102107	0.000240881	0.000101201	3.48597e-05	2.95788e-05	3.91476e-05	9.28332e-05	0.000332125	0.000320124	0.0002246	0.000237614	0.000155484	0.000170884	0.000115097	0.00020318	0.000258962	0.000229258	0.000181941	7.0831e-05	9.01315e-05	6.54131e-05	0.000122999	0.000113347	0.000121978	0.000187526	7.7105e-05	6.47314e-05	0.000209799	0.000258835	0.000277554	0.000327916	0.000216944	0.000112643	0.000155814	0.000142652
K01081	5'-nucleotidase [EC:3.1.3.5]	0.000263133	0.000153613	0.000361624	0.000469712	0.000357892	0.000331067	0.000439941	0.000206037	0.000234974	0.000322718	0.000521779	0.00026101	0.000385219	0.00035505	0.000398037	0.000340757	0.000349096	0.000129061	0.000424729	0.000217736	0.000456034	0.000503123	0.0003427	0.000401373	0.000336577	0.000266101	0.000302862	0.000414991	0.000428335	0.000375062	0.000278428	0.000301994	0.000298303	0.000129594	0.000259326	0.000251904	0.000295447	0.000237703	0.000159507	0.000299127	0.000505681	0.000349056	0.000519293	0.000399229	0.000299827	0.000351288	0.000342663	0.000200349
K01082	3'(2'), 5'-bisphosphate nucleotidase [EC:3.1.3.7]	0.000130163	2.48011e-05	0.000190846	0.000115372	0.00012037	7.07733e-05	9.48113e-05	7.74642e-05	2.40594e-05	4.87914e-05	0.000298176	1.91998e-05	0.000114096	3.86042e-05	0.000197503	4.49444e-05	1.93784e-05	1.76893e-05	1.43251e-05	5.87156e-05	0.00022258	0.000207731	8.86018e-05	0.00012503	0.000107582	8.93068e-05	2.67797e-05	9.94031e-05	0.00015014	0.000125483	8.86418e-05	2.41794e-05	4.76124e-05	3.01035e-05	8.72808e-05	5.15628e-05	4.61506e-05	9.00402e-05	2.20411e-05	4.0406e-05	0.000116183	0.000148587	0.000172552	0.00014103	6.49154e-05	3.49888e-05	5.38717e-05	1.93764e-05
K01085	glucose-1-phosphatase [EC:3.1.3.10]	8.32855e-07	0	0	0	2.4146e-06	1.7486e-06	9.21568e-08	8.88395e-07	4.77515e-07	3.14204e-07	0	0	4.16609e-06	4.05826e-07	0	5.78552e-07	0	0	0	0	3.29655e-07	0	2.15985e-06	1.67897e-07	9.92128e-07	0	0	0	7.20589e-07	6.91273e-08	1.05125e-06	0	0	0	4.70358e-07	5.71333e-07	0	3.32743e-07	0	1.33412e-07	0	3.1131e-06	0	4.5264e-08	0	0	3.40988e-06	1.04737e-06
K01087	trehalose 6-phosphate phosphatase [EC:3.1.3.12]	8.32855e-07	0	5.26018e-07	0	2.4146e-06	3.99039e-06	9.21568e-08	8.88395e-07	9.18297e-07	3.14204e-07	1.94759e-07	9.12103e-08	4.64655e-06	4.05826e-07	0	5.78552e-07	0	0	0	0	3.29655e-07	5.04288e-07	3.02379e-06	1.67897e-07	9.92128e-07	0	3.9754e-07	6.57718e-07	1.64706e-06	6.91273e-08	1.05125e-06	0	0	0	4.70358e-07	5.71333e-07	0	3.32743e-07	0	1.33412e-07	6.44514e-07	3.1131e-06	0	4.5264e-08	0	0	5.93408e-06	1.04737e-06
K01089	imidazoleglycerol-phosphate dehydratase / histidinol-phosphatase [EC:4.2.1.19 3.1.3.15]	0.000221173	0.000114887	0.000313877	0.000294229	0.000278552	0.000173873	0.000214938	0.000181175	0.000131904	0.000145611	0.000393355	4.51605e-05	0.000276396	0.000101431	0.000239458	0.000100485	3.28729e-05	2.80322e-05	3.75638e-05	9.12276e-05	0.000331122	0.00031871	0.000212853	0.000232908	0.00015362	0.000170242	0.000102863	0.000194685	0.000253146	0.000226582	0.000176106	6.26616e-05	7.2835e-05	6.39039e-05	0.000120728	0.000112178	0.000121275	0.000187326	7.54683e-05	6.3922e-05	0.000206766	0.000257825	0.000275831	0.00032436	0.000215296	0.000107192	0.00014864	0.000133708
K01090	protein phosphatase [EC:3.1.3.16]	0.000646276	0.000703426	0.000458732	0.000617301	0.000626131	0.000744061	0.000742427	0.000742145	0.000740427	0.000748107	0.000423837	0.000830668	0.000609643	0.000779693	0.00063174	0.000833694	0.000848084	0.000907425	0.000892248	0.000772666	0.000501201	0.000553345	0.000688492	0.000597148	0.000812023	0.000792639	0.00077232	0.000748026	0.000594572	0.000661052	0.000647303	0.000823747	0.000796094	0.000873745	0.000818538	0.000843994	0.000773365	0.000700332	0.000767037	0.000821519	0.000707402	0.000649042	0.000662582	0.00053885	0.00081511	0.000796154	0.000734371	0.000872312
K01091	phosphoglycolate phosphatase [EC:3.1.3.18]	0.00187378	0.00217713	0.00177351	0.00127832	0.00136947	0.00177085	0.00131148	0.00183888	0.00192099	0.00185023	0.0017763	0.00194593	0.00138024	0.00120675	0.00133651	0.00123376	0.00121828	0.0008215	0.000742468	0.00144842	0.00153981	0.00124483	0.00165507	0.00164511	0.0011056	0.0016006	0.00128484	0.00140357	0.00137363	0.00151191	0.00172816	0.00155857	0.00120986	0.0017548	0.00100034	0.00130022	0.0013991	0.00178643	0.00195756	0.00133385	0.00158111	0.0010807	0.00118183	0.00172869	0.00195187	0.00119017	0.0014315	0.00174341
K01092	myo-inositol-1(or 4)-monophosphatase [EC:3.1.3.25]	0.000344504	0.000401876	0.000542114	0.000390715	0.000429469	0.00039877	0.000399526	0.000466906	0.000244341	0.000328634	0.000552946	0.000485274	0.000440815	0.000385182	0.000490485	0.000381442	0.000245097	0.000564345	0.000238379	0.000332786	0.000417221	0.000447192	0.000288212	0.000500116	0.000402514	0.000437625	0.000404723	0.000357671	0.000488736	0.000387999	0.000410802	0.000357252	0.000438995	0.000311948	0.000530495	0.000439946	0.000218874	0.000356781	0.000255648	0.000268673	0.000326412	0.000420859	0.000418561	0.000460956	0.000356926	0.000308651	0.000514633	0.000470173
K01093	4-phytase / acid phosphatase [EC:3.1.3.26 3.1.3.2]	8.32855e-07	0	0	0	2.4146e-06	1.7486e-06	9.21568e-08	8.88395e-07	4.77515e-07	3.14204e-07	0	0	4.16609e-06	4.05826e-07	0	5.78552e-07	0	0	0	0	3.29655e-07	0	2.15985e-06	1.67897e-07	9.92128e-07	0	0	0	7.20589e-07	6.91273e-08	1.05125e-06	0	0	0	4.70358e-07	5.71333e-07	0	3.32743e-07	0	1.33412e-07	0	3.1131e-06	0	4.5264e-08	0	0	3.40988e-06	1.04737e-06
K01095	phosphatidylglycerophosphatase A [EC:3.1.3.27]	0.000122886	2.30575e-05	0.000191619	0.000115265	0.000122169	7.07733e-05	9.4639e-05	7.71166e-05	2.43716e-05	4.87914e-05	0.000296229	1.83789e-05	0.000114096	3.74543e-05	0.000196066	4.32087e-05	1.81558e-05	1.76893e-05	1.43251e-05	5.87156e-05	0.00022258	0.000208019	8.86978e-05	0.000125831	0.000107582	8.93068e-05	2.59666e-05	9.94031e-05	0.00015014	0.000112773	8.83895e-05	2.10937e-05	4.61491e-05	3.01035e-05	8.69574e-05	4.97416e-05	4.61506e-05	8.96409e-05	2.17606e-05	2.92349e-05	0.000114894	0.000148913	0.000170583	0.00014103	6.53429e-05	2.67057e-05	5.39381e-05	1.9544e-05
K01096	phosphatidylglycerophosphatase B [EC:3.1.3.27 3.1.3.81 3.1.3.4 3.6.1.27]	8.32855e-07	0	0	0	2.4146e-06	1.7486e-06	9.21568e-08	8.88395e-07	4.77515e-07	3.14204e-07	6.23229e-07	4.92535e-06	4.59851e-06	4.05826e-07	0	5.78552e-07	0	0	0	0	3.29655e-07	0	2.15985e-06	1.67897e-07	9.92128e-07	0	0	0	7.20589e-07	6.91273e-08	1.05125e-06	0	0	0	4.70358e-07	5.71333e-07	0	3.32743e-07	0	1.33412e-07	0	3.1131e-06	0	4.5264e-08	0	0	3.40988e-06	1.04737e-06
K01101	4-nitrophenyl phosphatase [EC:3.1.3.41]	8.05886e-05	1.65815e-05	5.58566e-05	0.000331738	0.000306783	0.000194856	0.000310082	7.47024e-05	0.000194991	0.000205615	6.64713e-05	0.000133623	0.000180894	0.000383607	0.0002566	0.000352889	0.00039663	0.000520867	0.000546325	0.000217693	0.000153393	0.000308282	0.00019909	0.000158074	0.000437625	0.000202636	0.000351823	0.000318971	0.000264559	0.000253132	0.000139535	0.000251595	0.000408298	0.000149067	0.000462634	0.000329545	0.00026192	0.000110271	9.58649e-05	0.000350215	0.000270999	0.000378191	0.000380265	7.08462e-05	5.30885e-05	0.000453331	0.000307244	0.000137499
K01104	protein-tyrosine phosphatase [EC:3.1.3.48]	0.00180067	0.00181574	0.00175419	0.00276037	0.00259749	0.00215854	0.00251525	0.00197989	0.00217931	0.00221928	0.00161379	0.00186347	0.0021752	0.00279962	0.00230475	0.00269772	0.00213184	0.00221899	0.00332655	0.00217994	0.00195504	0.00244742	0.00202843	0.00217009	0.0028903	0.0021755	0.00267552	0.00215845	0.00223696	0.00211615	0.00176215	0.00218049	0.00273853	0.00201143	0.00265787	0.00244046	0.00214609	0.001902	0.00186827	0.00255462	0.00265249	0.00269065	0.00278626	0.00182915	0.00173682	0.00287208	0.00250225	0.00212747
K01114	phospholipase C [EC:3.1.4.3]	2.13171e-06	2.30397e-06	1.64381e-07	3.55189e-06	2.31185e-06	5.32425e-06	7.8807e-06	1.46778e-06	4.36191e-06	9.04459e-06	1.65643e-05	3.20034e-05	5.59739e-06	3.80462e-06	5.10326e-06	3.49415e-06	5.29848e-05	5.82554e-05	4.14882e-05	3.40533e-05	9.57037e-06	0	2.35424e-05	3.61324e-06	1.92025e-07	2.78725e-06	2.25423e-05	1.16197e-05	3.10625e-05	1.62969e-05	1.50645e-05	5.47704e-05	2.16676e-05	1.24552e-05	1.22734e-06	6.93633e-06	4.72889e-05	7.17061e-06	9.74237e-07	2.74739e-05	3.88604e-07	6.78402e-06	0	5.88027e-06	0	1.65304e-05	1.28424e-06	5.81292e-06
K01117	sphingomyelin phosphodiesterase [EC:3.1.4.12]	0	0	0	0	0	0	0	0	0	0	0	0	0	0	0	0	1.98674e-07	7.24971e-07	0	2.85443e-07	0	0	7.1995e-07	0	0	0	2.8912e-07	0	3.60295e-07	0	0	0	0	0	0	0	4.55298e-07	0	0	0	0	0	0	0	0	0	0	0
K01118	FMN-dependent NADH-azoreductase [EC:1.7.1.17]	0.000152789	7.71787e-05	1.66025e-05	3.14962e-05	5.06552e-05	0.0001426	6.56027e-05	7.69427e-05	0.000113377	0.000168225	0.000149431	0.000181832	9.94279e-05	7.56189e-05	6.99506e-05	0.00013916	0.000346335	0.000623277	0.000167361	0.000157165	0.000175233	7.55531e-05	0.000241255	4.53719e-05	0.000102749	0.000103318	0.000117256	0.000213254	0.000106544	0.000117562	0.000205678	0.000246493	0.000163385	0.0001841	0.000239045	0.000146736	0.000328145	0.000143063	0.000108398	0.000164541	0.000118174	6.89248e-05	5.19947e-05	7.25832e-05	6.48951e-05	9.4803e-05	8.63763e-05	0.000102684
K01119	2',3'-cyclic-nucleotide 2'-phosphodiesterase / 3'-nucleotidase [EC:3.1.4.16 3.1.3.6]	0.000205755	5.06458e-05	0.000230265	0.000381122	0.000380942	0.000221197	0.00029663	0.000136176	0.000216449	0.000226667	0.000335797	9.9997e-05	0.000243869	0.000280544	0.000344218	0.000267553	0.000292418	0.00013681	0.000413105	0.000225852	0.000345448	0.000449717	0.000282508	0.000234769	0.000403812	0.000220911	0.000309033	0.000317481	0.000345986	0.000308113	0.000208603	0.000258474	0.00034287	0.000114615	0.000283368	0.000210208	0.000258899	0.00015706	9.51894e-05	0.000266352	0.000373761	0.000447043	0.000485845	0.000224284	0.000112915	0.000386249	0.000238906	0.000147198
K01126	glycerophosphoryl diester phosphodiesterase [EC:3.1.4.46]	0.00105089	0.000775697	0.00142995	0.00133916	0.00127455	0.000896099	0.00119403	0.000984902	0.000847889	0.00085968	0.00156108	0.000525015	0.0012583	0.00104185	0.0014183	0.000978074	0.000811884	0.00121416	0.000912732	0.000938998	0.00145122	0.00151303	0.00104534	0.0011913	0.00120702	0.00104781	0.00092559	0.0011047	0.0012958	0.00122577	0.00103404	0.000810072	0.00103199	0.000767045	0.00130801	0.00100942	0.000862727	0.00103155	0.000819879	0.000869556	0.00104532	0.00135778	0.00146679	0.00127063	0.00113011	0.000976025	0.000981647	0.000864177
K01129	dGTPase [EC:3.1.5.1]	0.000699519	0.000819082	0.000750779	0.000577738	0.000572264	0.000652204	0.000584211	0.000728462	0.000644415	0.000662686	0.000727341	0.000670426	0.000653231	0.000454161	0.000562659	0.000542413	0.000476028	0.000288417	0.000330542	0.000591383	0.000659496	0.000535731	0.000639403	0.00061462	0.000460601	0.000652742	0.000480635	0.000586162	0.000541416	0.000553258	0.000638178	0.000538038	0.000466629	0.000663212	0.000408261	0.000539097	0.000566535	0.000701319	0.000757118	0.00050456	0.000605189	0.000491858	0.000510129	0.000775152	0.000821939	0.00043788	0.000545558	0.000659852
K01130	arylsulfatase [EC:3.1.6.1]	0.00026691	7.40947e-05	0.000383215	0.000239588	0.000281498	0.000236912	0.000198315	0.000165499	0.000101453	0.000203051	0.00069268	0.000189353	0.000235061	7.65431e-05	0.000403708	0.000103338	3.64744e-05	4.2435e-05	2.86502e-05	0.000117431	0.0004572	0.00042784	0.000194162	0.000296887	0.000222802	0.000195931	6.98586e-05	0.000202022	0.000366763	0.000237258	0.000223553	0.00016816	0.000165361	6.02069e-05	0.00018928	0.000101126	9.23013e-05	0.000180147	6.63625e-05	9.13514e-05	0.000280452	0.000312015	0.00038551	0.000307746	0.000172022	8.06727e-05	0.000169092	6.31637e-05
K01133	choline-sulfatase [EC:3.1.6.6]	0.000238633	4.6115e-05	0.00038064	0.000230017	0.00023509	0.000135113	0.000187953	0.000150892	4.59883e-05	9.69544e-05	0.000583381	2.67246e-05	0.000218034	7.32685e-05	0.000392031	8.52603e-05	3.63115e-05	3.52497e-05	2.86502e-05	0.000117431	0.000441775	0.000406996	0.0001689	0.00024953	0.000212075	0.000176775	5.06682e-05	0.000197491	0.000294309	0.000222192	0.000173289	4.21875e-05	9.22983e-05	6.02069e-05	0.000172033	9.72337e-05	9.23013e-05	0.000178017	4.35211e-05	5.82031e-05	0.000227305	0.000290948	0.0003377	0.000280253	0.000128589	5.30306e-05	9.72259e-05	3.81034e-05
K01134	arylsulfatase A [EC:3.1.6.8]	2.73256e-05	2.79797e-05	2.57519e-06	9.44331e-06	4.39935e-05	9.66211e-05	9.431e-06	9.02571e-06	5.49876e-05	0.000105782	9.79638e-05	0.000162628	1.28605e-05	2.20938e-06	1.13758e-05	1.74988e-05	1.62913e-07	6.79862e-06	0	0	6.92076e-06	1.36039e-05	1.63347e-05	4.66043e-05	6.42227e-06	1.36393e-05	1.91903e-05	4.5308e-06	6.37037e-05	8.47367e-06	4.50496e-05	0.000125972	7.30631e-05	0	1.3954e-05	0	0	0	2.28414e-05	3.30149e-05	5.25215e-05	1.79547e-05	3.80966e-05	2.22953e-05	3.97077e-05	2.76421e-05	6.54666e-05	2.38244e-05
K01135	arylsulfatase B [EC:3.1.6.12]	2.73256e-05	2.79797e-05	2.57519e-06	9.44331e-06	4.39935e-05	9.66211e-05	9.431e-06	9.02571e-06	5.49876e-05	0.000105782	9.79638e-05	0.000162628	1.28605e-05	2.20938e-06	1.13758e-05	1.74988e-05	1.62913e-07	6.79862e-06	0	0	6.92076e-06	1.36039e-05	1.63347e-05	4.66043e-05	6.42227e-06	1.36393e-05	1.91903e-05	4.5308e-06	6.37037e-05	8.47367e-06	4.50496e-05	0.000125972	7.30631e-05	0	1.3954e-05	0	0	0	2.28414e-05	3.30149e-05	5.25215e-05	1.79547e-05	3.80966e-05	2.22953e-05	3.97077e-05	2.76421e-05	6.54666e-05	2.38244e-05
K01138	uncharacterized sulfatase [EC:3.1.6.-]	4.79883e-06	2.85835e-06	7.167e-06	0	0	5.38029e-06	4.58631e-06	0	2.38636e-05	1.52613e-06	4.21848e-07	2.58581e-07	2.97887e-06	1.22762e-05	5.17513e-07	1.25454e-05	1.73916e-05	0	4.92755e-06	2.03606e-06	0	0	0	1.08181e-05	0	0	9.21569e-06	0	2.38309e-05	4.45983e-06	5.76088e-06	5.26079e-06	7.13511e-06	4.08585e-06	0	1.82112e-06	0	8.82334e-06	3.27135e-05	9.74795e-06	1.13738e-06	1.75466e-06	0	1.35792e-05	4.47833e-07	6.41842e-06	9.57999e-06	1.02643e-05
K01139	GTP diphosphokinase / guanosine-3',5'-bis(diphosphate) 3'-diphosphatase [EC:2.7.6.5 3.1.7.2]	8.32855e-07	0	0	0	2.4146e-06	1.7486e-06	9.21568e-08	8.88395e-07	4.77515e-07	3.14204e-07	6.23229e-07	5.01657e-06	4.59851e-06	4.05826e-07	0	5.78552e-07	0	0	0	0	3.29655e-07	0	2.15985e-06	1.67897e-07	9.92128e-07	0	0	0	7.20589e-07	6.91273e-08	1.05125e-06	0	0	0	4.70358e-07	5.71333e-07	0	3.32743e-07	0	1.33412e-07	0	3.1131e-06	0	4.5264e-08	0	0	3.40988e-06	1.04737e-06
K01141	exodeoxyribonuclease I [EC:3.1.11.1]	8.32855e-07	0	0	0	2.4146e-06	1.7486e-06	9.21568e-08	8.88395e-07	4.77515e-07	3.14204e-07	6.23229e-07	4.92535e-06	4.59851e-06	4.05826e-07	0	5.78552e-07	0	0	0	0	3.29655e-07	0	2.15985e-06	1.67897e-07	9.92128e-07	0	0	0	7.20589e-07	6.91273e-08	1.05125e-06	0	0	0	4.70358e-07	5.71333e-07	0	3.32743e-07	0	1.33412e-07	0	3.1131e-06	0	4.5264e-08	0	0	3.40988e-06	1.04737e-06
K01142	exodeoxyribonuclease III [EC:3.1.11.2]	0.000863244	0.000791888	0.000808411	0.00116784	0.00114054	0.00103	0.00113575	0.000833804	0.00102131	0.00103659	0.000827554	0.000891885	0.00097603	0.00115259	0.00100526	0.00112075	0.00112215	0.000910035	0.00137236	0.000974426	0.000911878	0.00111916	0.000969476	0.000915281	0.00121489	0.000978391	0.00113704	0.00106603	0.00102846	0.00100279	0.000858755	0.00100903	0.00114901	0.000901179	0.00106203	0.0010713	0.00104696	0.000866401	0.000890432	0.00113647	0.00113207	0.00119777	0.00118324	0.000863654	0.000828311	0.00126246	0.00109225	0.000903314
K01143	exodeoxyribonuclease (lambda-induced) [EC:3.1.11.3]	0	0	0	0	0	0	0	0	0	0	0	0	0	0	0	0	0	0	0	0	0	0	0	0	0	0	0	0	0	0	0	0	0	0	0	0	0	0	0	0	0	0	0	0	0	0	0	0
K01144	protein Xni	0.000230334	0.000116631	0.000313877	0.000294571	0.000276549	0.000172125	0.000215449	0.000180634	0.000131574	0.000145297	0.000395419	4.11472e-05	0.000271798	0.000102175	0.000240895	0.000101642	3.40955e-05	2.80322e-05	3.75638e-05	9.12276e-05	0.000330792	0.000321231	0.000210693	0.00023274	0.000152628	0.000170242	0.000103911	0.000194685	0.000252425	0.000239744	0.000175307	6.57472e-05	7.42983e-05	6.39039e-05	0.000120581	0.000113427	0.000121275	0.000187392	7.57489e-05	7.49596e-05	0.000208548	0.000254712	0.000277914	0.000324314	0.000215296	0.000115665	0.000145673	0.000133331
K01146		8.32855e-07	0	0	0	2.4146e-06	1.7486e-06	9.21568e-08	8.88395e-07	4.77515e-07	3.14204e-07	6.23229e-07	4.92535e-06	4.59851e-06	4.05826e-07	0	5.78552e-07	0	0	0	0	3.29655e-07	0	2.15985e-06	1.67897e-07	9.92128e-07	0	0	0	7.20589e-07	6.91273e-08	1.05125e-06	0	0	0	4.70358e-07	5.71333e-07	0	3.32743e-07	0	1.33412e-07	0	3.1131e-06	0	4.5264e-08	0	0	3.40988e-06	1.04737e-06
K01147	exoribonuclease II [EC:3.1.13.1]	8.32855e-07	0	0	0	2.4146e-06	1.7486e-06	9.21568e-08	8.88395e-07	4.77515e-07	3.14204e-07	6.23229e-07	4.92535e-06	4.59851e-06	4.05826e-07	0	5.78552e-07	0	0	0	0	3.29655e-07	0	2.15985e-06	1.67897e-07	9.92128e-07	0	0	0	7.20589e-07	6.91273e-08	1.05125e-06	0	0	0	4.70358e-07	5.71333e-07	0	3.32743e-07	0	1.33412e-07	0	3.1131e-06	0	4.5264e-08	0	0	3.40988e-06	1.04737e-06
K01150	deoxyribonuclease I [EC:3.1.21.1]	8.32855e-07	0	0	0	2.4146e-06	1.7486e-06	9.21568e-08	8.88395e-07	4.77515e-07	3.14204e-07	6.23229e-07	4.92535e-06	4.59851e-06	4.05826e-07	0	5.78552e-07	0	0	0	0	3.29655e-07	0	2.15985e-06	1.67897e-07	9.92128e-07	0	0	0	7.20589e-07	6.91273e-08	1.05125e-06	0	0	0	4.70358e-07	5.71333e-07	0	3.32743e-07	0	1.33412e-07	0	3.1131e-06	0	4.5264e-08	0	0	3.40988e-06	1.04737e-06
K01151	deoxyribonuclease IV [EC:3.1.21.2]	0.000717048	0.0007677	0.000642353	0.000533617	0.000567448	0.000662998	0.00051794	0.000713977	0.000642625	0.000655619	0.000731549	0.000725442	0.00067663	0.000476972	0.00057599	0.000573087	0.000586858	0.000789175	0.00039248	0.000620998	0.000698287	0.000536785	0.000677333	0.000656264	0.000490229	0.000646218	0.000515248	0.000627061	0.000589309	0.000640485	0.00068026	0.000617952	0.00050229	0.000677268	0.000637839	0.00060074	0.000660748	0.000707949	0.000712955	0.000564414	0.000598962	0.000529216	0.000494072	0.000732995	0.000660231	0.000472135	0.000554769	0.000664304
K01153	type I restriction enzyme, R subunit [EC:3.1.21.3]	0.000721907	0.000603178	0.000789504	0.00114105	0.000690422	0.000640659	0.00120351	0.000542568	0.00080254	0.000647307	0.000728839	0.000602802	0.00100539	0.0010506	0.000799788	0.00104934	0.00101354	0.000725764	0.00133646	0.000761655	0.000951036	0.00109904	0.000857124	0.000803628	0.000860095	0.000693793	0.000741755	0.000857993	0.000732016	0.000883306	0.000629943	0.000615658	0.00073541	0.000540821	0.000816232	0.000784361	0.000912954	0.000683462	0.000876082	0.000981047	0.00125568	0.00072388	0.00130076	0.000919692	0.000930067	0.00105474	0.000652461	0.000561915
K01154	type I restriction enzyme, S subunit [EC:3.1.21.3]	0.00166309	0.00123922	0.00225118	0.00234305	0.00172438	0.00134306	0.00215964	0.00144068	0.00120617	0.00127719	0.00241892	0.00100016	0.0020577	0.00178352	0.0021278	0.00165992	0.00134956	0.000599393	0.00190589	0.00139144	0.00243771	0.00243676	0.00165226	0.00196294	0.00175906	0.00159288	0.0013761	0.00181074	0.00181151	0.0018187	0.00146617	0.000972127	0.00120279	0.00106156	0.00138137	0.00139205	0.00146134	0.00157596	0.0012238	0.00144151	0.00232992	0.00180043	0.00245089	0.00214117	0.00165959	0.00155158	0.00136586	0.00116015
K01155	type II restriction enzyme [EC:3.1.21.4]	0.000119376	2.30575e-05	0.00019032	0.000115073	0.000117545	6.79262e-05	0.000105851	7.77925e-05	2.75489e-05	5.71851e-05	0.000307369	5.66872e-05	0.000113437	4.02275e-05	0.000196166	4.26302e-05	1.84308e-05	1.78182e-05	1.43251e-05	5.87156e-05	0.000224975	0.000206884	8.78339e-05	0.000129557	0.000107694	9.11458e-05	2.53341e-05	9.87454e-05	0.000157191	0.000114989	0.000187796	8.49314e-05	5.37281e-05	3.01035e-05	8.7369e-05	5.02773e-05	4.61506e-05	9.02731e-05	2.17606e-05	2.91015e-05	0.000115899	0.000145474	0.000174521	0.000142703	6.93734e-05	2.65153e-05	4.84912e-05	1.79729e-05
K01156	type III restriction enzyme [EC:3.1.21.5]	7.85263e-05	7.56959e-05	3.75718e-05	9.70208e-05	0.000128196	0.000170354	0.000178608	5.37931e-05	0.000120658	0.000154978	0.000155632	0.000269321	0.000103524	0.000216773	0.000139283	0.00019347	0.000174476	0.00078959	0.000143251	7.65701e-05	6.34904e-05	0.000128636	6.02036e-05	0.000130358	0.000189342	0.000120455	0.000116407	0.000111015	0.000161035	0.000107798	0.000127026	0.000201208	0.000249731	0.000118463	0.000479858	0.000227783	8.85898e-05	0.000104648	0.000123066	0.000211051	0.00012846	0.000137598	0.000213261	2.9873e-05	0.000265253	0.000156157	0.00020339	7.34908e-05
K01159	crossover junction endodeoxyribonuclease RuvC [EC:3.1.21.10]	0.0004744	0.000284059	0.000373952	0.000411384	0.000429264	0.000454377	0.000396733	0.000325304	0.000355669	0.000447726	0.00066965	0.00040991	0.000501958	0.000197843	0.000338447	0.000355579	0.0003461	0.000211526	0.000289054	0.000335374	0.000508462	0.000477288	0.000468583	0.000370114	0.000261551	0.000283514	0.000237205	0.000374969	0.000397633	0.000365598	0.000423712	0.000452234	0.000278499	0.000280197	0.000232634	0.000274222	0.000496868	0.000370883	0.000302669	0.000351498	0.00049881	0.000393811	0.000427119	0.000500653	0.000595316	0.000284854	0.000328027	0.000289888
K01160	crossover junction endodeoxyribonuclease RusA [EC:3.1.21.10]	8.32855e-07	0	0	0	2.4146e-06	1.7486e-06	0	8.88395e-07	4.77515e-07	0	0	0	3.98784e-06	4.05826e-07	0	5.78552e-07	0	0	0	0	0	0	2.15985e-06	0	9.92128e-07	0	0	0	7.20589e-07	0	1.05125e-06	0	0	0	4.70358e-07	5.71333e-07	0	3.32743e-07	0	0	0	2.93804e-06	0	0	0	0	3.40988e-06	1.04737e-06
K01163	uncharacterized protein	0.000644352	0.000601589	0.000706171	0.000504746	0.000498872	0.000495985	0.000456779	0.000662743	0.00057029	0.000494333	0.000612618	0.000497081	0.000616938	0.000452865	0.000529246	0.000472776	0.000463532	0.000316631	0.000359183	0.000601623	0.000611281	0.000515562	0.000561213	0.000573013	0.000364639	0.000528399	0.000462971	0.000474368	0.000489731	0.000512828	0.000583772	0.000438863	0.000398162	0.000600929	0.000351137	0.000462538	0.000586775	0.00061464	0.000546015	0.00045413	0.000526954	0.000448143	0.000440544	0.000684163	0.000760776	0.000390232	0.000460407	0.000613248
K01166	ribonuclease T2 [EC:4.6.1.19]	0	0	0	0	0	0	0	0	0	0	6.23229e-07	5.01657e-06	4.32416e-07	0	0	0	0	0	0	0	0	0	0	0	0	0	0	0	0	0	0	0	0	0	0	0	0	0	0	0	0	0	0	0	0	0	0	0
K01169	ribonuclease I (enterobacter ribonuclease) [EC:4.6.1.21]	8.32855e-07	0	0	0	2.4146e-06	1.7486e-06	9.21568e-08	8.88395e-07	4.77515e-07	3.14204e-07	0	0	4.16609e-06	4.05826e-07	0	5.78552e-07	0	0	0	0	3.29655e-07	0	2.15985e-06	1.67897e-07	9.92128e-07	0	0	0	7.20589e-07	6.91273e-08	1.05125e-06	0	0	0	4.70358e-07	5.71333e-07	0	3.32743e-07	0	1.33412e-07	0	3.1131e-06	0	4.5264e-08	0	0	3.40988e-06	1.04737e-06
K01173	endonuclease G, mitochondrial	0.000559698	0.000247922	0.000814326	0.000696298	0.000666481	0.000391484	0.000513774	0.00041938	0.000266416	0.000333101	0.00105244	8.02422e-05	0.000636997	0.000232352	0.000671617	0.000241622	8.46046e-05	7.22393e-05	8.90655e-05	0.000240571	0.000873135	0.000826726	0.000486998	0.000570698	0.000406789	0.000419792	0.000228603	0.00047781	0.000625703	0.000562124	0.000418231	0.000145102	0.000186716	0.000155486	0.000319446	0.000261349	0.000280753	0.000454244	0.000171357	0.000162691	0.000522625	0.000651388	0.000706169	0.00076682	0.000488993	0.000244612	0.000326618	0.000264336
K01174	micrococcal nuclease [EC:3.1.31.1]	4.75917e-07	5.23064e-06	2.00544e-06	1.53844e-05	7.55205e-06	9.32584e-06	2.55886e-05	2.36583e-06	3.23975e-06	1.35579e-05	5.32082e-06	7.47696e-06	4.80463e-07	3.14515e-06	0	3.42868e-06	0	3.88617e-06	1.54866e-06	1.44862e-06	7.82346e-06	0	6.52755e-06	9.49829e-06	3.58446e-06	9.0188e-06	3.30681e-06	7.60761e-06	1.69853e-05	3.60503e-06	4.56981e-05	3.19593e-05	9.96334e-06	4.24401e-06	1.91083e-06	3.97433e-06	1.15894e-06	6.11415e-06	9.04092e-07	1.56536e-06	1.55442e-06	3.06046e-06	2.04116e-05	1.60647e-05	5.98468e-06	0	1.06282e-05	5.09023e-06
K01175	esterase [EC:3.1.-.-]	8.32855e-07	0	0	0	2.4146e-06	1.7486e-06	9.21568e-08	8.88395e-07	4.77515e-07	3.14204e-07	6.23229e-07	4.92535e-06	4.59851e-06	4.05826e-07	0	5.78552e-07	0	0	0	0	3.29655e-07	0	2.15985e-06	1.67897e-07	9.92128e-07	0	0	0	7.20589e-07	6.91273e-08	1.05125e-06	0	0	0	4.70358e-07	5.71333e-07	0	3.32743e-07	0	1.33412e-07	0	3.1131e-06	0	4.5264e-08	0	0	3.40988e-06	1.04737e-06
K01176	alpha-amylase [EC:3.2.1.1]	0.000159422	0.000184374	0.000207755	0.000154792	0.000216676	0.000196493	0.000246338	0.000193793	0.000107762	0.000181225	0.000418829	0.000236098	0.000158389	0.000125564	0.000243969	0.00010384	5.15736e-05	0.000416319	8.9787e-05	0.00016717	0.000279278	0.000260192	0.000185583	0.000225925	0.000230843	0.000192224	0.000123183	0.000237769	0.000271594	0.000196947	0.000197576	0.000224131	0.000250193	7.65173e-05	0.000357749	0.000181586	0.000171482	0.000131891	0.000116883	0.000144716	0.000337112	0.000220509	0.0003345	0.00021692	0.000221202	0.000119779	0.000173941	0.000103257
K01179	endoglucanase [EC:3.2.1.4]	0.000894625	0.000835497	0.000458852	0.00056659	0.000604395	0.000830157	0.000807612	0.000539913	0.000775728	0.000872882	0.000948477	0.000796699	0.000548277	0.000328093	0.000440466	0.000834547	0.0006581	0.000383497	0.000429489	0.000518207	0.000709168	0.000640968	0.000880066	0.000673373	0.000517107	0.000434791	0.000387366	0.000591661	0.000513266	0.000578987	0.000627809	0.00082327	0.000519022	0.000614854	0.000417384	0.000475563	0.000766644	0.000623294	0.000842886	0.000748142	0.000854227	0.000484596	0.00080533	0.000521778	0.00200059	0.000417003	0.00056945	0.000512899
K01181	endo-1,4-beta-xylanase [EC:3.2.1.8]	0.000158639	5.35397e-05	0.000191306	0.000193407	0.000170178	8.54346e-05	0.000201432	0.000118678	4.37106e-05	6.56911e-05	0.000329948	2.11763e-05	0.000121485	3.72007e-05	0.00019894	9.06195e-05	4.65814e-05	3.46749e-05	1.51346e-05	6.02616e-05	0.000230441	0.000232999	0.00016614	0.00016199	0.000129169	8.96708e-05	3.19116e-05	0.000116811	0.000168824	0.000138366	8.91885e-05	3.05525e-05	5.50229e-05	5.18902e-05	9.38805e-05	6.2668e-05	5.07032e-05	0.000122328	4.5444e-05	6.55137e-05	0.000138779	0.000164734	0.000290572	0.000154423	0.000544972	3.44018e-05	5.00482e-05	4.6252e-05
K01182	oligo-1,6-glucosidase [EC:3.2.1.10]	0.000250144	0.000350646	0.00026919	0.000208826	0.000166954	0.000292464	0.000315271	0.000400261	0.000441943	0.000263292	8.831e-05	0.000472781	0.000244435	0.000341221	0.000322109	0.000348821	0.000399957	0.000298245	0.000273022	0.000400795	0.000168996	0.000181607	0.000233348	0.000147483	0.000344117	0.000437234	0.000256883	0.000381641	0.000260236	0.000421856	0.00029884	0.000216375	0.00025691	0.000546192	0.000332638	0.000466234	0.00022122	0.000449938	0.000422325	0.000305142	0.000146141	0.00016856	0.000165527	0.000334307	0.000236456	0.000301982	0.000229901	0.000534391
K01183	chitinase [EC:3.2.1.14]	8.32855e-07	2.07447e-07	4.2739e-07	0	2.4146e-06	7.12889e-06	2.91284e-06	8.88395e-07	9.02392e-06	4.93749e-07	4.21848e-07	2.58581e-07	4.16609e-06	7.44014e-07	0	5.78552e-07	7.48848e-07	1.01045e-06	0	7.23027e-07	3.29655e-07	0	4.12771e-06	1.67897e-07	9.92128e-07	0	1.31911e-06	1.90738e-06	1.08088e-06	6.91273e-08	1.05125e-06	0	1.24453e-06	3.03143e-07	6.61441e-07	1.9461e-06	4.55298e-07	3.59928e-06	9.76731e-07	3.79779e-06	0	3.56197e-06	5.68041e-07	2.06598e-06	0	6.10757e-07	1.01557e-05	8.35803e-06
K01185	lysozyme [EC:3.2.1.17]	3.17278e-06	1.06748e-07	4.56978e-06	1.48067e-05	1.88544e-05	1.19039e-05	1.74805e-05	7.70586e-06	3.3426e-06	2.24431e-06	1.73336e-05	4.28688e-05	3.21492e-05	6.55409e-05	3.59528e-05	6.12961e-05	2.33213e-05	0.000390421	3.85405e-05	1.4472e-05	2.20689e-05	2.17744e-05	1.19512e-05	1.76664e-05	6.23601e-05	2.60909e-05	1.85759e-05	1.51275e-05	3.20148e-05	1.56124e-05	7.90544e-06	4.09735e-06	6.72727e-05	2.42515e-05	0.000214366	8.4093e-05	1.24172e-05	1.89331e-05	4.61399e-06	3.75154e-05	2.74866e-06	4.35348e-05	4.93817e-05	7.78944e-06	8.52918e-06	3.42271e-05	3.77523e-05	5.59297e-06
K01186	sialidase-1 [EC:3.2.1.18]	0.000610066	0.00030913	0.000823355	0.000734078	0.000766618	0.000605575	0.000561295	0.000450227	0.000386511	0.000550849	0.00126445	0.000416888	0.000671439	0.000242233	0.000695533	0.000279451	8.57098e-05	9.04522e-05	9.23916e-05	0.000242605	0.000904496	0.00086438	0.000539442	0.000683617	0.000427346	0.000459465	0.000269966	0.000498426	0.000781085	0.000582435	0.000521639	0.000400309	0.000340478	0.000162234	0.000355145	0.000270669	0.000285968	0.000462687	0.000218941	0.000221695	0.000630929	0.00069199	0.000815858	0.000840307	0.000583431	0.000293803	0.000473272	0.000321516
K01187	alpha-glucosidase [EC:3.2.1.20]	0.00149489	0.000986506	0.00187217	0.00172142	0.00183278	0.00136054	0.00143118	0.00126714	0.00127015	0.001343	0.002323	0.00106907	0.00146554	0.00123892	0.0018681	0.00101847	0.000813397	0.000842771	0.000958444	0.0011248	0.00195089	0.00202252	0.00133742	0.00161123	0.00157485	0.00139987	0.00119977	0.00142154	0.00190294	0.00166507	0.0013104	0.000984226	0.00127051	0.000961854	0.00141038	0.00119545	0.000954815	0.00131736	0.000939035	0.00107368	0.00146477	0.00186098	0.00193865	0.00167303	0.00110733	0.00129032	0.00129951	0.00102904
K01190	beta-galactosidase [EC:3.2.1.23]	0.00261011	0.00212188	0.00324462	0.00290645	0.00311713	0.00265305	0.00266102	0.00238692	0.00218629	0.00252179	0.00402	0.00252088	0.00272602	0.00190658	0.00299478	0.00179933	0.0012389	0.00120927	0.00133391	0.00181288	0.0031872	0.00316195	0.00228855	0.00273151	0.00241776	0.00245523	0.00196817	0.00233616	0.00312163	0.00275684	0.00234544	0.00193415	0.00201502	0.00181021	0.00210789	0.00205736	0.00151181	0.0024311	0.0018791	0.00175925	0.00246448	0.00290441	0.00309258	0.00310009	0.00239243	0.00198011	0.00238466	0.00213566
K01191	alpha-mannosidase [EC:3.2.1.24]	0.000214599	9.5794e-05	0.000283902	0.000175447	0.000135886	0.000120205	0.00012551	0.000134592	5.01453e-05	0.000157102	0.000320989	4.71028e-05	0.00015812	0.000138054	0.000245229	0.000103348	8.19864e-05	2.29735e-05	7.26462e-05	0.000149791	0.000261189	0.000216033	0.000130119	0.000177071	0.000123536	0.00012442	8.67902e-05	0.000149477	0.000238	0.000144437	0.000212101	7.58262e-05	0.000121457	0.000135795	0.000147751	9.46984e-05	9.31982e-05	0.000197078	0.000127466	0.000132694	0.000156282	0.00015947	0.000170355	0.000248952	0.000159245	9.75716e-05	9.84654e-05	8.24915e-05
K01192	beta-mannosidase [EC:3.2.1.25]	0.000614419	0.000193554	0.000856506	0.000540735	0.000532227	0.000386014	0.000439532	0.000490442	0.000127659	0.000324012	0.00119731	0.000116563	0.000508402	0.000249318	0.00088663	0.000271204	0.00012328	0.000152018	9.85862e-05	0.000321054	0.000940844	0.000859315	0.000432342	0.000540997	0.000513402	0.000494818	0.000177194	0.000489375	0.000689913	0.00051555	0.00047091	0.000166297	0.000236117	0.00032781	0.000452609	0.000312081	0.000253794	0.000525024	0.000184648	0.000215783	0.000522309	0.000616448	0.000707173	0.000726148	0.000366307	0.000201713	0.000269853	0.000312201
K01193	beta-fructofuranosidase [EC:3.2.1.26]	0.000492624	0.000780976	0.00050672	0.000557995	0.0005471	0.000557578	0.000534289	0.000714105	0.000520449	0.000571842	0.000176853	0.000672076	0.000473997	0.000731411	0.000591791	0.000703827	0.000458438	0.00117078	0.000659746	0.000650503	0.000468858	0.000454733	0.00054487	0.00046996	0.00080184	0.000817686	0.0006655	0.000555388	0.000516611	0.000493309	0.000575478	0.000515767	0.000724463	0.000847727	0.000976536	0.000848948	0.000519695	0.000636321	0.00055371	0.000610844	0.00044577	0.000547795	0.000607955	0.000593816	0.000363437	0.000673665	0.000551832	0.000825854
K01194	alpha,alpha-trehalase [EC:3.2.1.28]	1.66571e-06	0	0	0	4.8292e-06	3.49719e-06	1.84314e-07	1.77679e-06	9.55029e-07	6.28408e-07	0	0	8.33218e-06	8.11652e-07	0	1.1571e-06	0	0	0	0	6.59311e-07	0	4.3197e-06	3.35794e-07	1.98426e-06	0	0	0	1.44118e-06	1.38255e-07	2.10251e-06	0	0	0	9.40715e-07	1.14267e-06	0	6.65486e-07	0	2.66823e-07	0	6.2262e-06	0	9.05279e-08	0	0	6.81976e-06	2.09475e-06
K01195	beta-glucuronidase [EC:3.2.1.31]	0.000215184	0.000114573	0.000312003	0.000290463	0.000276883	0.000168	0.00021063	0.00017202	0.000122651	0.000148013	0.000379389	3.51246e-05	0.000266537	0.000104661	0.000237057	0.000111173	3.60364e-05	2.7275e-05	4.22978e-05	9.34015e-05	0.000325443	0.000309633	0.00020071	0.000236548	0.000150996	0.000165327	0.000107471	0.000189532	0.000254973	0.000220213	0.000191978	8.00576e-05	7.79245e-05	6.67772e-05	0.000116289	0.000106964	0.000117384	0.000191164	9.6096e-05	7.11707e-05	0.000204681	0.000252957	0.000266761	0.000312917	0.000212039	0.000111317	0.0001492	0.000131801
[truncated: 4,460 more rows]
[truncated: 32 more columns]
